# Supplementary material
Source: publisher site journal article supplement (https://www.dovepress.com/get_supplementary_file.php?f=503118.xlsx)
Supplement: Supplementary file 1 [file get_supplementary_file.php]

## Sheet: Table 1
Supplementary Table 1: STROBE-MR checklist of recommended items to address in reports of Mendelian randomization studies1 2
Item No.	Section	Checklist item	Page No.	Relevant text from manuscript
1	TITLE and ABSTRACT	Indicate Mendelian randomization (MR) as the study’s design in the title and/or the abstract if that is a main purpose of the study
	INTRODUCTION
2	Background	Explain the scientific background and rationale for the reported study. What is the exposure? Is a potential causal relationship between exposure and outcome plausible? Justify why MR is a helpful method to address the study question
3	Objectives	State specific objectives clearly, including pre-specified causal hypotheses (if any). State that MR is a method that, under specific assumptions, intends to estimate causal effects
	METHODS
4	Study design and data sources	Present key elements of the study design early in the article. Consider including a table listing sources of data for all phases of the study. For each data source contributing to the analysis, describe the following:
	a)	Setting: Describe the study design and the underlying population, if possible. Describe the setting, locations, and relevant dates, including periods of recruitment, exposure, follow-up, and data collection, when available.
	b)	Participants: Give the eligibility criteria, and the sources and methods of selection of participants. Report the sample size, and whether any power or sample size calculations were carried out prior to the main analysis
	c)	Describe measurement, quality control and selection of genetic variants
	d)	For each exposure, outcome, and other relevant variables, describe methods of assessment and diagnostic criteria for diseases
	e)	Provide details of ethics committee approval and participant informed consent, if relevant
5	Assumptions	Explicitly state the three core IV assumptions for the main analysis (relevance, independence and exclusion restriction) as well assumptions for any additional or sensitivity analysis
6	Statistical methods: main analysis	Describe statistical methods and statistics used
	a)	Describe how quantitative variables were handled in the analyses (i.e., scale, units, model)
	b)	Describe how genetic variants were handled in the analyses and, if applicable, how their weights were selected
	c)	Describe the MR estimator (e.g. two-stage least squares, Wald ratio) and related statistics. Detail the included covariates and, in case of two-sample MR, whether the same covariate set was used for adjustment in the two samples
	d)	Explain how missing data were addressed
	e)	If applicable, indicate how multiple testing was addressed
7	Assessment of assumptions	Describe any methods or prior knowledge used to assess the assumptions or justify their validity
8	Sensitivity analyses and additional analyses	Describe any sensitivity analyses or additional analyses performed (e.g. comparison of effect estimates from different approaches, independent replication, bias analytic techniques, validation of instruments, simulations)
9	Software and pre-registration
	a)	Name statistical software and package(s), including version and settings used
	b)	State whether the study protocol and details were pre-registered (as well as when and where)
	RESULTS
10	Descriptive data
	a)	Report the numbers of individuals at each stage of included studies and reasons for exclusion. Consider use of a flow diagram
	b)	Report summary statistics for phenotypic exposure(s), outcome(s), and other relevant variables (e.g. means, SDs, proportions)
	c)	If the data sources include meta-analyses of previous studies, provide the assessments of heterogeneity across these studies
	d)	For two-sample MR:
		i. Provide justification of the similarity of the genetic variant-exposure associations between the exposure and outcome samples
		ii. Provide information on the number of individuals who overlap between the exposure and outcome studies
11	Main results
	a)	Report the associations between genetic variant and exposure, and between genetic variant and outcome, preferably on an interpretable scale
	b)	Report MR estimates of the relationship between exposure and outcome, and the measures of uncertainty from the MR analysis, on an interpretable scale, such as odds ratio or relative risk per SD difference
	c)	If relevant, consider translating estimates of relative risk into absolute risk for a meaningful time period
	d)	Consider plots to visualize results (e.g. forest plot, scatterplot of associations between genetic variants and outcome versus between genetic variants and exposure)
12	Assessment of assumptions
	a)	Report the assessment of the validity of the assumptions
	b)	Report any additional statistics (e.g., assessments of heterogeneity across genetic variants, such as I2, Q statistic or E-value)
13	Sensitivity analyses and additional analyses
	a)	Report any sensitivity analyses to assess the robustness of the main results to violations of the assumptions
	b)	Report results from other sensitivity analyses or additional analyses
	c)	Report any assessment of direction of causal relationship (e.g., bidirectional MR)
	d)	When relevant, report and compare with estimates from non-MR analyses
	e)	Consider additional plots to visualize results (e.g., leave-one-out analyses)
	DISCUSSION
14	Key results	Summarize key results with reference to study objectives
15	Limitations	Discuss limitations of the study, taking into account the validity of the IV assumptions, other sources of potential bias, and imprecision. Discuss both direction and magnitude of any potential bias and any efforts to address them
16	Interpretation
	a)	Meaning: Give a cautious overall interpretation of results in the context of their limitations and in comparison with other studies
	b)	Mechanism: Discuss underlying biological mechanisms that could drive a potential causal relationship between the investigated exposure and the outcome, and whether the gene-environment equivalence assumption is reasonable. Use causal language carefully, clarifying that IV estimates may provide causal effects only under certain assumptions
	c)	Clinical relevance: Discuss whether the results have clinical or public policy relevance, and to what extent they inform effect sizes of possible interventions
17	Generalizability	Discuss the generalizability of the study results (a) to other populations, (b) across other exposure periods/timings, and (c) across other levels of exposure
	OTHER INFORMATION
18	Funding	Describe sources of funding and the role of funders in the present study and, if applicable, sources of funding for the databases and original study or studies on which the present study is based
19	Data and data sharing	Provide the data used to perform all analyses or report where and how the data can be accessed, and reference these sources in the article. Provide the statistical code needed to reproduce the results in the article, or report whether the code is publicly accessible and if so, where
20	Conflicts of Interest	All authors should declare all potential conflicts of interest
This checklist is copyrighted by the Equator Network under the Creative Commons Attribution 3.0 Unported (CC BY 3.0) license.
1. Skrivankova VW, Richmond RC, Woolf BAR, Yarmolinsky J, Davies NM, Swanson SA, et al. Strengthening the Reporting of Observational Studies in Epidemiology using Mendelian Randomization (STROBE-MR) Statement. JAMA. 2021;under review.
2. Skrivankova VW, Richmond RC, Woolf BAR, Davies NM, Swanson SA, VanderWeele TJ, et al. Strengthening the Reporting of Observational Studies in Epidemiology using Mendelian Randomisation (STROBE-MR): Explanation and Elaboration. BMJ. 2021;375:n2233.

## Sheet: Table 2
Supplementary Table 2: Detailed information about the data.
ID	Type	Descriptive
GCST90199621-GCST90201020	GWAS	Summary statistics for 1400 plasma metabolite traits (N = 8,299)
GCST90001001-GCST90002000	GWAS	Summary statistics for 731 immune cells traits (N = 3,629)
GCST002318	GWAS	Summary statistics for RA traits (N = 58,284)
GSM4819747	scRNA-seq	scRNA-seq for PBMC from RA patient
GSM4104139, GSM4104140	scRNA-seq	scRNA-seq for PBMC from CT group
GSE93272	Bulk RNA-seq	Gene expression from the whole blood of RA (n=232) and CT (n=43)
GSE68689	Bulk RNA-seq	Gene expression from the whole blood of RA (n=10) and CT (n=5)

## Sheet: Table 3
Supplementary Table 3: The primer sequence for PCR analysis.
Gene	Forward Primer	Reverse Primer
β-actin	CATGTACGTTGCTATCCAGGC	CTCCTTAATGTCACGCACGAT
PFN1	TCAAGTTTTTACGTGAATGGGCT	CGAAGATCCATGCTAAATTCCCC
SRP14	AAGTATGACGGTCGAACCAAAC	TCGGTAGCTCTTAACAGACACT
S100A11	TGGCAAAAATCTCCAGCCCT	GAAGGGACAGCCTTGAGGAA
SAP18	CACTGTTGCTACGGGTCTTCA	GCTGGACGGTACATTTCCCC

## Sheet: Table 4
Supplementary Table 4: The results of horizontal pleiotropy analysis.
Outcome	Exposure	Egger_intercept	se	pval
RA	Adenosine 5'-diphosphate (ADP) to N-palmitoyl-sphingosine (d18:1 to 16:0) ratio	0.00226921	0.0147251	0.879726
RA	1-palmitoyl-2-stearoyl-gpc (16:0/18:0) levels	-0.019574	0.0103312	0.07269
RA	Mannitol/sorbitol levels	0.0480499	0.02061	0.0364685
RA	Maltose to sucrose ratio	0.0112328	0.0181921	0.547599
RA	Octadecanedioylcarnitine (C18-DC) levels	0.00119224	0.00989826	0.905627
RA	Cysteine to alanine ratio	-0.000561085	0.0147171	0.969932
RA	Cysteinylglycine to glutamate ratio	-0.00458779	0.0204884	0.82534
RA	Benzoate to linoleoyl-arachidonoyl-glycerol (18:2 to 20:4) [1] ratio	0.0159262	0.0174054	0.386934
RA	Tryptophan betaine levels	0.00879446	0.00806824	0.285001
RA	Pimeloylcarnitine/3-methyladipoylcarnitine (C7-DC) levels	-0.0111243	0.00973449	0.264406
RA	X-22509 levels	-0.0021233	0.0277914	0.940359
RA	Phosphate to tyrosine ratio	0.00439943	0.0113849	0.702585
RA	Argininate levels	0.00486024	0.016132	0.766856
RA	Ximenoylcarnitine (C26:1) levels	0.000559255	0.0104408	0.957708
RA	5alpha-pregnan-diol disulfate levels	-0.00524207	0.0159712	0.746753
RA	Spermidine to histidine ratio	0.00802372	0.01903	0.684392
RA	Aspartate to mannose ratio	-0.0107119	0.0170381	0.539
RA	X-16580 levels	-0.00516078	0.0332378	0.879422
RA	X-14939 levels	-0.0196661	0.0139284	0.179807
RA	Paraxanthine to 5-acetylamino-6-formylamino-3-methyluracil ratio	0.014978	0.0170944	0.393889
RA	N6-acetyllysine levels	-0.0164054	0.0091524	0.0963472
RA	X-17346 levels	0.032799	0.0177277	0.0855079
RA	Creatinine levels	-0.00922526	0.0191908	0.637657
RA	2-methoxyresorcinol sulfate levels	0.00496716	0.0173586	0.778954
RA	Cys-gly,oxidized levels	0.00952323	0.00863058	0.283621
RA	Taurolithocholate 3-sulfate levels	0.0154387	0.0116919	0.206475
RA	S-adenosylhomocysteine (SAH) levels	-0.0032655	0.0122363	0.792301
RA	Gamma-glutamyl-alpha-lysine levels	-0.0138341	0.0110807	0.224413
RA	Serine levels	0.00701208	0.0110898	0.531549
RA	Pipecolate levels	-0.0279159	0.0175802	0.131869
RA	Adenosine 5'-diphosphate (ADP) to phosphate ratio	0.0511204	0.0195005	0.021126
RA	Isoursodeoxycholate levels	0.00212267	0.0170134	0.902961
RA	Etiocholanolone glucuronide levels	0.0032165	0.00887361	0.721215
RA	Lactosyl-N-palmitoyl-sphingosine (d18:1/16:0) levels	0.00758659	0.0169738	0.66129
RA	1-palmitoyl-2-linoleoyl-GPI (16:0/18:2) levels	0.0273071	0.0164584	0.11784
RA	5alpha-pregnan-3beta,20alpha-diol disulfate levels	-0.0203422	0.00934052	0.0415599
RA	X-24418 levels	-0.00529889	0.00989604	0.597707
RA	Oleate/vaccenate (18:1) levels	0.0152472	0.0243119	0.54142
RA	10-nonadecenoate (19:1n9) levels	0.0324429	0.0232344	0.200141
RA	3beta-hydroxy-5-cholestenoate levels	0.0134362	0.0117544	0.266508
RA	Docosapentaenoate (n6 DPA; 22:5n6) levels	-0.00152959	0.025108	0.952917
RA	Gamma-glutamylisoleucine levels	-0.00336356	0.0195334	0.867094
RA	N-acetyl-isoputreanine levels	-0.0012206	0.009012	0.893347
RA	(2,4 or 2,5)-dimethylphenol sulfate levels	0.000279384	0.0190445	0.988502
RA	X-17367 levels	0.012029	0.0141791	0.414316
RA	N-acetylneuraminate levels	0.00358385	0.0106412	0.738619
RA	X-16124 levels	-0.000323155	0.0172285	0.98532
RA	Adenosine 5'-monophosphate (AMP) to isoleucine ratio	-0.00327403	0.0264942	0.904367
RA	1-linolenoyl-GPC (18:3) levels	-0.00190259	0.0189881	0.921136
RA	X-18901 levels	0.0158682	0.012962	0.236657
RA	Glutamate to cysteine ratio	-0.0352389	0.0189737	0.0773575
RA	X-12730 levels	0.017595	0.0174264	0.339023
RA	Glucose to fructose ratio	-0.0475932	0.0222591	0.0612059
RA	Isobutyrylcarnitine (c4) levels	0.00524194	0.00866288	0.552269
RA	Hydroxyasparagine levels	-0.00232501	0.0152413	0.880663
RA	X-23593 levels	0.0161565	0.0132163	0.241714
RA	2-aminophenol sulfate levels	0.0296668	0.0147336	0.056449
RA	Phosphate to N-palmitoyl-sphingosine (d18:1 to 16:0) ratio	-0.0171455	0.0165591	0.313475
RA	Glycosyl-N-(2-hydroxynervonoyl)-sphingosine (d18:1/24:1(2OH)) levels	0.00455676	0.00933966	0.630244
RA	3-hydroxyhexanoate levels	-0.051899	0.0227179	0.0431931
RA	Succinimide levels	-0.00691909	0.0182209	0.712948
RA	Glycine to serine ratio	0.0154539	0.0068558	0.0340172
RA	6-hydroxyindole sulfate levels	-0.00989126	0.0211212	0.650697
RA	1-stearoyl-2-docosahexaenoyl-gpc (18:0/22:6) levels	0.00155276	0.0100228	0.878178
RA	Glycocholate levels	-0.00671825	0.0103724	0.523326
RA	21-hydroxypregnenolone disulfate levels	0.00714042	0.0116413	0.544766
RA	Glycoursodeoxycholic acid sulfate (1) levels	0.0136887	0.0199127	0.500571
RA	Adenosine 5'-diphosphate (ADP) to EDTA ratio	0.0101898	0.0133865	0.455418
RA	X-17654 levels	-0.00770443	0.011281	0.503331
RA	Cholate levels	-0.0116835	0.0407916	0.778752
RA	Arginine to citrulline ratio	0.0114774	0.0109478	0.303434
RA	4-ethylphenylsulfate levels	0.0615658	0.0388325	0.147333
RA	Hypotaurine to taurine ratio	-0.0355255	0.0203651	0.101533
RA	Mannose to trans-4-hydroxyproline ratio	0.00340277	0.019569	0.86428
RA	Aspartate to glutamate ratio	-0.00446686	0.0148528	0.767057
RA	Adenosine 5'-monophosphate (AMP) to asparagine ratio	-0.013904	0.0178135	0.446471
RA	Phosphate to glucose ratio	0.00189165	0.0181718	0.918811
RA	Phosphate to N-acetylneuraminate ratio	-0.000727439	0.0143735	0.960165
RA	3-hydroxyisobutyrate to adenosine 5'-diphosphate (ADP) ratio	0.00822211	0.014209	0.571409
RA	X-18779 levels	0.0286876	0.0191731	0.162719
RA	Sphingadienine levels	-0.0280847	0.0174623	0.133744
RA	Isovalerate (i5:0) levels	-0.0310653	0.0155598	0.0738168
RA	Methionine to phosphate ratio	0.0250094	0.0302823	0.446479
RA	tryptophan to tyrosine ratio	-0.00288061	0.0178087	0.873812
RA	Hydroquinone sulfate levels	-0.137248	0.110891	0.255733
RA	Dibutyl sulfosuccinate levels	0.0139757	0.017012	0.42058
RA	Sulfate of piperine metabolite C16H19NO3 (2) levels	-0.0213841	0.0236241	0.377325
RA	Glucuronate levels	0.00958922	0.0205936	0.650556
RA	Glycerophosphorylcholine (GPC) levels	0.023801	0.0169397	0.173973
RA	Hippurate levels	0.0241676	0.0192948	0.232436
RA	Mannose to N-acetylglucosamine to N-acetylgalactosamine ratio	-0.00253445	0.0128475	0.845606
RA	Sphingosine to phosphate ratio	-0.0150459	0.0212398	0.492239
RA	Glyco-beta-muricholate levels	-0.00851936	0.0113403	0.462779
RA	Salicylate levels	0.00365644	0.0174325	0.837382
RA	3-Hydroxybutyrate levels	-0.0215626	0.0323292	0.523559
RA	Palmitate (16:0) levels	0.0255836	0.0166418	0.145043
RA	Bilirubin degradation product,C17H20N2O5 (1) levels	-0.000494895	0.0120731	0.967977
RA	3-methyl catechol sulfate (2) levels	0.00458803	0.0152705	0.767096
RA	N-palmitoyl-sphingadienine (d18:2/16:0) levels	-0.0262518	0.0272199	0.352428
RA	Arachidonate (20:4n6) to oleate to vaccenate (18:1) ratio	-0.00654336	0.0094035	0.497916
RA	4-methylcatechol sulfate levels	0.0419742	0.0291169	0.171416
RA	3-methoxycatechol sulfate (1) levels	0.0057943	0.0145396	0.695516
RA	N6,N6-dimethyllysine levels	0.0106982	0.00994672	0.295596
RA	Hexanoylcarnitine levels (Biocrates platform)	-0.0191261	0.0107018	0.0941285
RA	N-palmitoyl-sphinganine (d18:0/16:0) levels	-0.0139468	0.0195402	0.485664
RA	Acetoacetate levels	-0.0184034	0.0194581	0.380766
RA	Hexadecanedioate (C16-DC) levels	0.00400493	0.00701032	0.57574
RA	Glycochenodeoxycholate levels	-0.025437	0.0166433	0.139495
RA	4-acetamidobutanoate levels	-0.0239656	0.00999118	0.0309472
RA	Citraconate/glutaconate levels	0.0237092	0.011943	0.0670714
RA	Fructose to maltose ratio	-0.023445	0.0170206	0.188581
RA	Glycosyl-N-tricosanoyl-sphingadienine (d18:2/23:0) levels	-0.0127184	0.0190225	0.513284
RA	Gamma-glutamylhistidine levels	0.044754	0.0261465	0.114972
RA	Phosphate to alanine ratio	-0.0136209	0.0125121	0.294705
RA	Methionine sulfone levels	-0.0109453	0.00986608	0.277419
RA	1-oleoyl-GPE (18:1) levels	-0.0126328	0.023824	0.602077
RA	Phosphocholine levels	0.00778494	0.0130299	0.556899
RA	X-21383 levels	-0.0445832	0.0172869	0.0201822
RA	2,2'-Methylenebis(6-tert-butyl-p-cresol) levels	0.0260638	0.0204589	0.228936
RA	X-24456 levels	0.00160817	0.0228489	0.944884
RA	X-24243 levels	0.0173723	0.0158479	0.288282
RA	X-13553 levels	0.0112085	0.0138523	0.431971
RA	1-oleoyl-GPC (18:1) levels	-0.0362866	0.0232413	0.146744
RA	Trans 3,4-methyleneheptanoate levels	-0.016492	0.0179327	0.384643
RA	4-hydroxyhippurate levels	-0.0402546	0.0270125	0.170354
RA	3-phosphoglycerate to phosphate ratio	0.00640241	0.0130287	0.62942
RA	Alpha-ketoglutarate to pyruvate ratio	-0.025688	0.0247424	0.326256
RA	X-12714 levels	-0.0120425	0.0214604	0.592198
RA	Dihydrocaffeate sulfate (2) levels	-0.00870915	0.0201042	0.669747
RA	Adenosine 5'-diphosphate (ADP) to citrate ratio	0.00364925	0.0183896	0.845053
RA	N,N,N-trimethyl-5-aminovalerate levels	-0.0017673	0.014016	0.900501
RA	2'-o-methylcytidine levels	0.00842913	0.00783832	0.303354
RA	Adenosine 3',5'-cyclic monophosphate (camp) levels	0.00517297	0.0155118	0.742074
RA	Dopamine 4-sulfate levels	0.00498169	0.0128057	0.703556
RA	Sphingomyelin (d18:1/20:2,d18:2/20:1,d16:1/22:2) levels	0.0290579	0.0135256	0.0463885
RA	N-formylmethionine levels	-0.0293183	0.0170296	0.107152
RA	1-stearoyl-GPG (18:0) levels	-0.0136979	0.0113069	0.238571
RA	N-acetylcitrulline levels	-0.025435	0.00966889	0.0233823
RA	Serine to alpha-ketobutyrate ratio	-0.00500164	0.0217963	0.823128
RA	X-21310 levels	0.00465052	0.0175939	0.795674
RA	Glucose to N-palmitoyl-sphinganine (d18:0 to 16:0) ratio	0.0275423	0.0211885	0.210996
RA	Isobutyrylglycine levels	-0.001276	0.0126003	0.920216
RA	Benzoate levels	0.020676	0.0176792	0.275862
RA	2-hydroxyglutarate levels	0.00319385	0.017853	0.859912
RA	X-12026 levels	-0.0204523	0.0140519	0.162754
RA	1-oleoyl-2-arachidonoyl-GPE (18:1/20:4) levels	-0.000181805	0.0102413	0.986022
RA	N-lactoyl phenylalanine levels	-0.00889618	0.0253113	0.732528
RA	P-cresol glucuronide levels	0.0221362	0.0162391	0.194359
RA	Alpha-ketoglutarate to succinate ratio	-0.000427852	0.0194655	0.982798
RA	3-hydroxypyridine glucuronide levels	0.0125715	0.0196034	0.531009
RA	Aspartate to phosphate ratio	-0.000269134	0.0157999	0.986668
RA	Adenosine 5'-diphosphate (ADP) to fructose ratio	0.00811891	0.0150973	0.597322
RA	Adenosine 5'-monophosphate (AMP) to cysteine ratio	0.000378614	0.0197463	0.984902
RA	X-11381 levels	0.0343466	0.0130343	0.0168096
RA	3-hydroxydodecanedioate levels	-0.0133538	0.0187739	0.488582
RA	Arginine levels	-0.00123913	0.0213795	0.95442
RA	Linolenoylcarnitine (C18:3) levels	0.00522676	0.0189311	0.78601
RA	3-carboxy-4-methyl-5-propyl-2-furanpropanoate (cmpf) levels	0.0295176	0.0222698	0.21189
RA	Taurodeoxycholate levels	-0.00145871	0.0170365	0.933071
RA	2-hydroxy-4-(methylthio)butanoic acid levels	-0.00430708	0.0129138	0.74239
RA	3-methoxycatechol sulfate (2) levels	0.0299866	0.0214756	0.200146
RA	Adenosine 5'-diphosphate (ADP) to choline ratio	0.0227929	0.0214426	0.305786
RA	3-hydroxyisobutyrate to phosphate ratio	0.0079758	0.0190221	0.683075
RA	Phenylpyruvate to citrate ratio	0.0076538	0.0144604	0.602153
RA	Phosphate to threonine ratio	-0.00827022	0.0195407	0.67688
RA	Pro-hydroxy-pro levels	0.0092992	0.0132205	0.48992
RA	3-aminoisobutyrate levels	0.00605373	0.00555431	0.288099
RA	1-stearoyl-2-oleoyl-GPS (18:0/18:1) levels	-0.0146723	0.0375241	0.703992
RA	Bilirubin degradation product,C17H20N2O5 (2) levels	-0.00101796	0.0110615	0.927981
RA	2-butenoylglycine levels	0.0214508	0.0153097	0.175781
RA	X-12844 levels	-1.7362e-05	0.0104389	0.998686
RA	Glycine to phosphate ratio	0.00257721	0.0072287	0.725377
RA	Sphingomyelin (d17:1/16:0,d18:1/15:0,d16:1/17:0) levels	-0.000565513	0.00975495	0.954294
RA	N-delta-acetylornithine levels	0.0247279	0.0115739	0.0474706
RA	Adenosine 5'-diphosphate (ADP) to glycerol 3-phosphate ratio	0.0152967	0.012413	0.23369
RA	1-dihomo-linolenylglycerol (20:3) levels	-0.0186452	0.0183236	0.327455
RA	Adenosine 5'-diphosphate (ADP) to glutamine ratio	0.0406826	0.0188602	0.0476327
RA	Uridine to pseudouridine ratio	0.0191265	0.0184529	0.313694
RA	X-21733 levels	-0.02428	0.020536	0.249703
RA	X-12680 levels	0.0165455	0.0222152	0.470739
RA	X-23641 levels	-0.0124813	0.0164413	0.458805
RA	Glycosyl ceramide (d18:1/23:1,d17:1/24:1) levels	0.024371	0.0199051	0.24102
RA	N2-acetyl,N6-methyllysine levels	0.0132455	0.00933574	0.170632
RA	2,4-di-tert-butylphenol levels	0.00640373	0.0188266	0.742508
RA	Adenosine 5'-diphosphate (ADP) to mannitol to sorbitol ratio	-0.0346838	0.0217846	0.142442
RA	1-linoleoyl-GPI (18:2) levels	0.028053	0.0122481	0.0359168
RA	Urate levels	0.0141361	0.0119805	0.249137
RA	X-16964 levels	0.022153	0.0183225	0.248171
RA	Kynurenine levels	0.00343337	0.0190478	0.85897
RA	2-furoylcarnitine levels	0.00710403	0.0162052	0.6689
RA	Spermidine to ergothioneine ratio	-0.00658519	0.0245279	0.791563
RA	1-palmitoyl-GPC (16:0) levels	0.033956	0.0173061	0.0645696
RA	3-ethylcatechol sulfate (2) levels	0.0122139	0.0183265	0.516771
RA	Iminodiacetate (IDA) levels	0.0407241	0.0214522	0.0819564
RA	Isoleucine to phosphate ratio	-0.019836	0.0201332	0.336887
RA	Linoleoyl-arachidonoyl-glycerol (18:2/20:4) [1] levels	-0.0301927	0.0077997	0.00150785
RA	Octadecenedioylcarnitine (C18:1-DC) levels	0.0139091	0.0159147	0.399284
RA	N-lactoyl valine levels	0.0304109	0.0313211	0.354476
RA	Stearate (18:0) levels	0.0429053	0.024475	0.107383
RA	Cytidine levels	-0.00608918	0.0150196	0.689477
RA	Indoleacetoylcarnitine levels	-0.0132932	0.0124278	0.297527
RA	Stearoylcarnitine levels	0.00361878	0.019515	0.855218
RA	X-26054 levels	-0.00637316	0.00851876	0.46136
RA	Sphingomyelin (d18:1/14:0,d16:1/16:0) levels	-0.0113141	0.00992901	0.267961
RA	Erythritol levels in elite athletes	-0.0111084	0.0137861	0.431502
RA	X-17690 levels	-0.0113925	0.0196554	0.566653
RA	Epiandrosterone sulfate levels	-0.0030105	0.010488	0.778285
RA	X-12216 levels	0.0250264	0.0202385	0.233056
RA	Galactonate levels	0.0117185	0.0260176	0.663072
RA	Adenosine 5'-diphosphate (ADP) to 5-oxoproline ratio	0.0102081	0.0169184	0.557494
RA	Bilirubin (Z,Z) to etiocholanolone glucuronide ratio	-0.000563099	0.00960942	0.953757
RA	1-stearoyl-2-arachidonoyl-GPI (18:0/20:4) levels	-0.0141346	0.0177562	0.436985
RA	X-11843 levels	0.00931678	0.0143919	0.528664
RA	Arachidonoylcarnitine (C20:4) levels	0.0126782	0.00730611	0.0940936
RA	Adenosine 5'-monophosphate (AMP) to proline ratio	-0.0242811	0.0160314	0.153805
RA	Succinylcarnitine levels	0.00035771	0.00999548	0.971775
RA	X-18887 levels	0.00950399	0.0160918	0.567888
RA	Threonate levels	0.0254064	0.0188621	0.196763
RA	1-(1-enyl-palmitoyl)-2-oleoyl-gpc (p-16:0/18:1) levels	-0.0151451	0.0217562	0.495757
RA	(N(1) + N(8))-acetylspermidine levels	-0.00838741	0.00963059	0.392801
RA	Glucuronide of piperine metabolite C17H21NO3 (3) levels	0.0182761	0.0189163	0.35675
RA	Leucine to N-palmitoyl-sphingosine (d18:1 to 16:0) ratio	0.0012935	0.0349255	0.970945
RA	1-(1-enyl-palmitoyl)-2-arachidonoyl-gpc (p-16:0/20:4) levels	-0.00671782	0.00572762	0.250725
RA	X-18345 levels	0.00498674	0.014958	0.742316
RA	X-24947 levels	0.0134921	0.0101374	0.194767
RA	Adenosine 5'-diphosphate (ADP) to gluconate ratio	0.00676249	0.0173431	0.701168
RA	Dihomo-linoleoylcarnitine (C20:2) levels	0.027029	0.0114364	0.0289178
RA	Histidine to trans-urocanate ratio	-0.0113251	0.0137054	0.418876
RA	Kynurenate levels	0.0162268	0.0121165	0.194813
RA	Cortisone levels	-0.0432084	0.0249008	0.113356
RA	Phosphate levels (UKB data field 30810)	0.00542371	0.0140303	0.703368
RA	Spermidine to N-acetylputrescine ratio	0.0178159	0.0126772	0.187526
RA	Glucose-to-mannose ratio	0.0113348	0.0101916	0.278638
RA	4-methylguaiacol sulfate levels	-0.000209755	0.0243151	0.993287
RA	Furaneol sulfate levels	0.0248021	0.0285346	0.413548
RA	1-(1-enyl-palmitoyl)-2-palmitoyl-GPC (P-16:0/16:0) levels	0.00388142	0.00820963	0.640309
RA	N-acetylkynurenine (2) levels	-0.0100841	0.0124797	0.434793
RA	Linoleate (18:2n6) levels	0.0156494	0.032582	0.643867
RA	3-methylglutaconate levels	0.00624494	0.0076021	0.423448
RA	Cholesterol to taurocholate ratio	0.0253321	0.0150942	0.119125
RA	Alpha-ketobutyrate to pyruvate ratio	0.0656272	0.0279037	0.046542
RA	3,4-dihydroxybutyrate levels	-0.00294307	0.0188172	0.877456
RA	Behenoylcarnitine (C22) levels	0.00259767	0.017268	0.88193
RA	Propyl 4-hydroxybenzoate sulfate levels	-0.000372876	0.0142323	0.979324
RA	Phosphoethanolamine to choline ratio	0.0168321	0.0226658	0.471999
RA	X-11849 levels	0.0171625	0.0169235	0.32064
RA	Pantothenate levels	0.00264761	0.0170332	0.878206
RA	Ornithine to glutamate ratio	-0.0461619	0.0272471	0.116
RA	1-oleoyl-2-docosahexaenoyl-GPC (18:1/22:6) levels	0.0175146	0.0171	0.316372
RA	X-24588 levels	-0.0156731	0.0119969	0.203298
RA	3b-hydroxy-5-cholenoic acid levels	0.028834	0.014614	0.0617984
RA	Palmitoylcholine levels	-0.00782923	0.0148348	0.60593
RA	3-bromo-5-chloro-2,6-dihydroxybenzoic acid levels	-0.00571569	0.0113432	0.620133
RA	2,3-dihydroxy-2-methylbutyrate levels	0.00368414	0.0153249	0.815405
RA	Androstenediol (3beta,17beta) disulfate (2) levels	0.00324206	0.0113091	0.777309
RA	X-21807 levels	-0.0137359	0.0160761	0.409601
RA	2'-o-methyluridine levels	0.00404288	0.00901309	0.669496
RA	Paraxanthine to linoleate (18:2n6) ratio	0.0303888	0.0241815	0.234895
RA	Picolinoylglycine levels	0.0232963	0.0188115	0.233428
RA	Catechol sulfate levels	-0.011167	0.0151799	0.470931
RA	Sphingomyelin (d18:2/24:1,d18:1/24:2) levels	-0.00759547	0.018326	0.682215
RA	Plasma free proline levels	0.0187593	0.0150155	0.224672
RA	Alpha-ketoglutarate to kynurenine ratio	-0.0251879	0.0221089	0.270391
RA	5-dodecenoylcarnitine (C12:1) levels	-0.00695462	0.0189547	0.718495
RA	1-(1-enyl-palmitoyl)-GPE (p-16:0) levels	0.01994	0.0209834	0.353904
RA	Theobromine levels	-0.00238207	0.0167798	0.88878
RA	3-ethylcatechol sulfate (1) levels	0.0433362	0.0218711	0.0690968
RA	Arachidonoylcholine levels	-0.00362568	0.015131	0.813869
RA	Hypotaurine to cysteine ratio	-0.0112047	0.0149103	0.46033
RA	Umbelliferone sulfate levels	-0.0249002	0.0143504	0.103206
RA	X-22520 levels	0.00621406	0.0184288	0.740354
RA	Pristanate levels	-0.0485855	0.0381918	0.2504
RA	X-17328 levels	0.00202866	0.0201724	0.92143
RA	Glycine conjugate of C10H14O2 (1) levels	-0.00505685	0.0114537	0.664411
RA	Inosine 5'-monophosphate (IMP) to urate ratio	-0.00628458	0.0205848	0.76497
RA	Pyridoxal levels	-0.012731	0.0116424	0.285028
RA	Beta-hydroxyisovalerate levels	-0.01794	0.0119391	0.147825
RA	2,3-dihydroxyisovalerate levels	-0.00865169	0.0281858	0.7631
RA	Dopamine 3-o-sulfate levels	0.0101936	0.0128874	0.439852
RA	Alpha-ketobutyrate to 3-methyl-2-oxobutyrate ratio	-0.00986972	0.020809	0.642117
RA	1-linoleoyl-GPE (18:2) levels	0.0219412	0.00829363	0.0141629
RA	10-undecenoate (11:1n1) levels	-0.00226296	0.0136099	0.87071
RA	Margarate (17:0) levels	0.0107775	0.0158193	0.507647
RA	Octadecanedioate levels	-0.00996945	0.0179372	0.584514
RA	Alpha-ketoglutarate levels	-0.0217356	0.0158167	0.18722
RA	Eicosenedioate (C20:1-DC) levels	0.0118548	0.0200895	0.56607
RA	Alpha-ketobutyrate levels	-0.0183652	0.0154712	0.258174
RA	Nisinate (24:6n3) levels	-0.0133746	0.0228132	0.567737
RA	Carnitine C18:2 levels	0.000869776	0.0138451	0.950565
RA	X-25265 levels	0.00298903	0.0141226	0.834422
RA	1-oleoylglycerol (18:1) levels	-0.0302454	0.0217759	0.181798
RA	X-17357 levels	-0.0122422	0.0112672	0.290165
RA	Alpha-ketoglutarate to alpha-ketobutyrate ratio	0.0198501	0.0183376	0.29871
RA	Glucose to N-stearoyl-sphingosine (d18:1 to 18:0) ratio	0.01636	0.0255594	0.534153
RA	Phytanate levels	0.00134124	0.0113155	0.907459
RA	1-arachidonoyl-gpc (20:4n6) levels	-0.00963003	0.00700756	0.183208
RA	Butyrate/isobutyrate (4:0) levels	0.0207469	0.0212807	0.346147
RA	X-21258 levels	0.0119218	0.0157523	0.460877
RA	4-allylphenol sulfate levels	-3.49912e-05	0.0187025	0.998528
RA	9-hydroxystearate levels	0.00809249	0.01967	0.685374
RA	Phosphate to linoleoyl-arachidonoyl-glycerol (18:2 to 20:4) [2] ratio	0.019862	0.0128517	0.135881
RA	Pyrraline levels	0.0302782	0.0264248	0.271076
RA	1,2-dilinoleoyl-GPE (18:2/18:2) levels	0.0189356	0.0107245	0.09541
RA	Vanillic acid glycine levels	-0.0144093	0.0152739	0.359508
RA	Hexanoylglutamine levels	0.00353925	0.00911634	0.701752
RA	Taurochenodeoxycholic acid 3-sulfate levels	0.0166815	0.0128985	0.206118
RA	Pregnenediol disulfate (C21H34O8S2) levels	0.00128737	0.0079553	0.87292
RA	1-palmitoleoylglycerol (16:1) levels	0.000204742	0.0120517	0.986599
RA	Gamma-glutamylglycine levels	0.00461356	0.00756788	0.54973
RA	5,6-dihydrouridine levels	0.00424298	0.00954889	0.661135
RA	Hydroxy-cmpf levels	-0.0375901	0.0193366	0.0722733
RA	Alpha-ketobutyrate to 4-methyl-2-oxopentanoate ratio	0.0222485	0.0402467	0.591454
RA	Adenosine 5'-monophosphate (AMP) to citrate ratio	-0.0161809	0.0157066	0.321704
RA	N-acetylglutamate levels	-0.00061508	0.0220211	0.978085
RA	EDTA levels	0.0356886	0.0229278	0.153999
RA	Arachidonate (20:4n6) to paraxanthine ratio	-0.0620431	0.0195773	0.00808258
RA	X-12812 levels	-0.00222432	0.0218464	0.921135
RA	X-12544 levels	0.0245298	0.0178004	0.198239
RA	3-(3-hydroxyphenyl)propionate levels	0.00433017	0.0174219	0.807595
RA	Thymol sulfate levels	-0.000235975	0.023315	0.992067
RA	4-hydroxyphenylacetoylcarnitine levels	-0.00510052	0.0184542	0.785581
RA	1-methylxanthine levels	0.0175529	0.0102489	0.102238
RA	X-25433 levels	0.0111261	0.00948281	0.253226
RA	X-12007 levels	-0.0342514	0.0256798	0.224034
RA	Retinol (Vitamin A) levels	-0.0148665	0.0158424	0.361182
RA	Sarcosine levels	-0.0218146	0.0195056	0.283648
RA	Propionylcarnitine (c3) levels	-0.00810214	0.01351	0.556173
RA	X-21742 levels	0.00392243	0.0162522	0.812785
RA	1-palmitoyl-2-docosahexaenoyl-GPE (16:0/22:6) levels	0.00726488	0.00982398	0.471016
RA	1-palmitoyl-2-linoleoyl-GPE (16:0/18:2) levels	0.0111089	0.00780599	0.170113
RA	Alpha-ketobutyrate to 3-methyl-2-oxovalerate ratio	0.00896295	0.0296984	0.767579
RA	1-linoleoyl-2-arachidonoyl-GPC (18:2/20:4n6) levels	-0.0089684	0.00963635	0.363692
RA	Tetrahydrocortisol glucuronide levels	-0.00901724	0.0189165	0.63932
RA	Myristoleate (14:1n5) levels	0.0226441	0.030569	0.480017
RA	N-acetylasparagine levels	0.00281552	0.0069521	0.690537
RA	Palmitoyl dihydrosphingomyelin (d18:0/16:0) levels	0.0148873	0.0144034	0.310844
RA	2,3-dihydroxy-5-methylthio-4-pentenoate (dmtpa) levels	0.00559096	0.0189239	0.770556
RA	X-12306 levels	-0.014974	0.0202786	0.470335
RA	Caffeine levels	0.0194035	0.0169201	0.26736
RA	X-12830 levels	6.10399e-05	0.0120327	0.996008
RA	Dihomo-linolenate (20:3n3 or n6) levels	-0.0148355	0.0196673	0.464103
RA	1-oleoyl-2-linoleoyl-GPE (18:1/18:2) levels	-0.00225924	0.00690832	0.746479
RA	Quinolinate levels	0.024175	0.0193105	0.229772
RA	X-19438 levels	0.020284	0.0124151	0.124576
RA	Theophylline levels	0.0231199	0.0129045	0.0910116
RA	X-13507 levels	0.00645323	0.0315951	0.842704
RA	Carnitine to propionylcarnitine (C3) ratio	0.0231987	0.012773	0.0860274
RA	N-acetyl leucine levels	0.00258233	0.022186	0.909265
RA	Pregnenolone sulfate levels	-0.00684693	0.0130223	0.603864
RA	Deoxycholic acid glucuronide levels	0.00213161	0.0109538	0.847669
RA	Hexanoylglycine levels	0.0222353	0.0215052	0.315644
RA	3-hydroxyisobutyrate levels	0.0195498	0.0257499	0.469499
RA	X-24328 levels	0.00752817	0.0126901	0.557788
RA	Adenosine 5'-diphosphate (ADP) to phosphoethanolamine ratio	0.0101211	0.0175994	0.573761
RA	Histidine to phosphate ratio	0.00740185	0.0114191	0.52388
RA	X-24295 levels	-0.0119367	0.0145914	0.426127
RA	1-(1-enyl-oleoyl)-GPE (p-18:1) levels	-0.0196077	0.0172416	0.275971
RA	Adenosine 5'-monophosphate (AMP) to valine ratio	0.0201904	0.0371387	0.596639
RA	X-18921 levels	0.0235815	0.0113398	0.0673154
RA	Eicosanedioate (C20-DC) levels	0.0071093	0.0213299	0.746539
RA	Spermidine to ornithine ratio	-0.0100384	0.0143881	0.501272
RA	Bilirubin (z,z) levels	0.00682268	0.00775016	0.388198
RA	Ornithine levels	0.000426791	0.0140279	0.97603
RA	Alpha-ketoglutarate to aspartate ratio	0.00380526	0.0132981	0.777859
RA	N-acetylarginine levels	0.00136005	0.00635374	0.832312
RA	3-hydroxy-2-methylpyridine sulfate levels	0.0301906	0.0319987	0.362634
RA	X-24585 levels	0.0138552	0.0223508	0.547951
RA	Phenylalanine levels	-0.0270852	0.0205694	0.212509
RA	Octadecadienedioate (C18:2-DC) levels	0.00710215	0.00724786	0.337333
RA	X-24306 levels	0.0154501	0.0177274	0.397196
RA	C-glycosyltryptophan levels	-0.00839237	0.0170522	0.627273
RA	Nicotinamide levels	0.0111465	0.0160833	0.497122
RA	Trans-urocanate levels	0.00710634	0.0142763	0.626373
RA	Glycerol to sulfate ratio	0.000788724	0.0157235	0.960614
RA	X-15461 levels	0.0128915	0.017788	0.476615
RA	3-hydroxydecanoate levels	0.00854037	0.0183674	0.65191
RA	X-26111 levels	0.00144097	0.0147066	0.923883
RA	X-12411 levels	-0.00979636	0.0172303	0.583564
RA	Cortolone glucuronide (1) levels	0.00922226	0.0177659	0.610015
RA	2-hydroxyarachidate levels	-0.020613	0.0184439	0.278432
RA	Glycine to pyridoxal ratio	0.0160956	0.0232417	0.506078
RA	Xanthurenate levels	-0.00468093	0.0160923	0.774137
RA	N-carbamoylalanine levels	-0.0246473	0.0152013	0.12447
RA	Xylose levels	0.00736307	0.012298	0.556078
RA	N-stearoyl-sphingadienine (d18:2/18:0) levels	0.0156478	0.0164066	0.362697
RA	Caffeine to theophylline ratio	0.0234131	0.0161883	0.167399
RA	Arginine to phosphate ratio	-0.00360035	0.015969	0.824477
RA	Caffeine to theobromine ratio	0.0296354	0.0207244	0.174662
RA	1-stearoyl-2-linoleoyl-GPE (18:0/18:2) levels	0.00331444	0.0103577	0.752133
RA	Sphingosine 1-phosphate levels	-0.00204642	0.0220396	0.927437
RA	Acetylcarnitine levels (Biocrates platform)	0.0111599	0.0193058	0.576008
RA	Linoleoyl-arachidonoyl-glycerol (18:2/20:4) [2] levels	-0.00507141	0.01268	0.692225
RA	Ribitol levels	0.00816889	0.0101783	0.429784
RA	Adenosine 5'-monophosphate (AMP) to tryptophan ratio	0.0115807	0.0165854	0.492682
RA	5-oxoproline to citrate ratio	0.0129622	0.00834784	0.142789
RA	Homoarginine levels	0.00289625	0.0102727	0.780889
RA	3-phenylpropionate hydrocinnamate levels	-0.0308808	0.0212364	0.16651
RA	1,3-dimethylurate levels	0.00461009	0.019459	0.81502
RA	1-stearoyl-2-arachidonoyl-gpc (18:0/20:4) levels	-0.00561992	0.00751498	0.461274
RA	Campesterol levels	0.0250761	0.0103309	0.0282734
RA	1-(1-enyl-stearoyl)-2-linoleoyl-GPE (p-18:0/18:2) levels	6.23482e-05	0.016479	0.997028
RA	Phosphate to citrate ratio	-0.00634184	0.0147245	0.670378
RA	Phenol glucuronide levels	0.0153734	0.0177384	0.40073
RA	Threonine to alpha-ketobutyrate ratio	0.0012455	0.0165357	0.940892
RA	X-16397 levels	0.0255279	0.0386221	0.523568
RA	3-(3-amino-3-carboxypropyl)uridine levels	0.000432986	0.0245414	0.986356
RA	Carboxyethyl-gaba levels	0.02034	0.0161387	0.228156
RA	2-hydroxy-3-methylvalerate levels	-0.0270287	0.0164656	0.120195
RA	2-methoxyhydroquinone sulfate (1) levels	0.0226156	0.0251922	0.384513
RA	1-palmitoyl-GPE (16:0) levels	-0.0195947	0.0150352	0.212139
RA	Sulfate of piperine metabolite C16H19NO3 (3) levels	-0.0127199	0.0224104	0.57696
RA	X-12851 levels	-0.0321744	0.0173879	0.081715
RA	Maltotriose levels	0.0261788	0.0143556	0.0839852
RA	Adenosine 5'-monophosphate (AMP) to phosphate ratio	-0.013698	0.0192414	0.490136
RA	Dodecadienoate (12:2) levels	-0.0118599	0.0118451	0.329289
RA	X-12849 levels	-0.00853917	0.0148936	0.572501
RA	Uridine to cytidine ratio	0.0231681	0.0211602	0.299233
RA	X-17351 levels	-0.0131882	0.018878	0.498117
RA	X-21283 levels	0.000933387	0.0127453	0.943064
RA	Glutamine conjugate of C6H10O2 (1) levels	0.034555	0.0209175	0.124447
RA	Phenylpyruvate to 4-hydroxyphenylpyruvate ratio	0.0053463	0.0189246	0.780779
RA	Pyruvate to 3-methyl-2-oxobutyrate ratio	-0.0193729	0.0184102	0.310492
RA	N-acetyl-3-methylhistidine levels	-0.00289713	0.0147318	0.846299
RA	Homocitrulline levels	0.00507989	0.0102596	0.627236
RA	1-stearoyl-gpc (18:0) levels	0.0186599	0.0160067	0.254296
RA	Alpha-ketoglutarate to trans-4-hydroxyproline ratio	0.0219316	0.0253153	0.411532
RA	N-acetylisoleucine levels	0.0305723	0.0203468	0.156851
RA	Phosphate to phosphoethanolamine ratio	0.00391393	0.0307919	0.901991
RA	X-12740 levels	-0.0220501	0.033147	0.530634
RA	X-21736 levels	-0.00453083	0.0130697	0.732462
RA	Dimethylglycine levels	-0.00852188	0.00817182	0.305945
RA	Ethylparaben sulfate levels	0.0208959	0.0195091	0.307069
RA	4-hydroxy-2-oxoglutaric acid levels	0.0228602	0.014374	0.127432
RA	Tauro-beta-muricholate levels	-0.00663965	0.0138612	0.638841
RA	1-stearoyl-2-arachidonoyl-GPE (18:0/20:4) levels	0.01344	0.00970456	0.179963
RA	4-vinylguaiacol sulfate levels	-0.0100029	0.0168741	0.562147
RA	Adenosine 5'-monophosphate (AMP) to acetoacetate ratio	-0.0185531	0.0150812	0.234455
RA	Catechol glucuronide levels	0.0245009	0.0388492	0.540083
RA	Succinate to acetoacetate ratio	0.0882164	0.0625666	0.217617
RA	Dihydroorotate levels	0.00601282	0.0121291	0.625485
RA	Alpha-ketoglutarate to ornithine ratio	-0.0122866	0.0165572	0.472319
RA	X-11315 levels	0.00873907	0.0127792	0.503854
RA	N-palmitoyl-heptadecasphingosine (d17:1/16:0) levels	-0.00353519	0.0147412	0.812798
RA	Trigonelline levels	0.00189141	0.0103783	0.857426
RA	X-24970 levels	-0.00430798	0.0226414	0.851648
RA	Methionine sulfoxide levels	0.0105157	0.0200248	0.605564
RA	2-hydroxystearate levels	0.0405815	0.0176419	0.0386379
RA	1-stearoyl-2-oleoyl-GPE (18:0/18:1) levels	-0.0202506	0.00988754	0.0532597
RA	X-12462 levels	-0.00264628	0.0252298	0.919884
RA	Mannonate levels	0.0265353	0.012192	0.0471325
RA	Oleoylcholine levels	0.00178378	0.0225559	0.938171
RA	5-methyluridine (ribothymidine) levels	-0.0151551	0.00948388	0.126545
RA	1-(1-enyl-stearoyl)-GPE (p-18:0) levels	0.00334736	0.024563	0.893036
RA	Levulinoylcarnitine levels	0.0262279	0.0199106	0.214521
RA	16a-hydroxy DHEA 3-sulfate levels	-0.007441	0.0103527	0.480218
RA	X-12193 levels	0.00501749	0.0149027	0.740731
RA	Chiro-inositol levels	-0.0143734	0.0217656	0.527566
RA	3-hydroxyhexanoylcarnitine (1) levels	0.0136589	0.0278868	0.63311
RA	Phenylacetylcarnitine levels	-0.010819	0.0149551	0.479856
RA	Cortisol to taurocholate ratio	-0.0197699	0.0168791	0.271565
RA	Blood sugar levels	-0.0103113	0.0216324	0.641516
RA	Butyrylglycine levels	0.00743837	0.00840585	0.388553
RA	Tetradecadienedioate (C14:2-DC) levels	-0.00441698	0.00972631	0.654396
RA	Spermidine to 5-methylthioadenosine (MTA) ratio	-0.0259087	0.0265279	0.348016
RA	Spermidine to adenosine 5'-diphosphate (ADP) ratio	-0.0254317	0.0175261	0.16307
RA	4-hydroxyphenylacetylglutamine levels	-0.0220554	0.0268734	0.423869
RA	Bilirubin (E,E) levels	-0.00570129	0.00977366	0.56653
RA	5alpha-pregnan-3beta,20alpha-diol monosulfate (2) levels	-0.00797627	0.0107778	0.467087
RA	Vanillic alcohol sulfate levels	-0.00116981	0.0144836	0.936471
RA	Phosphate to mannose ratio	0.0182385	0.0184767	0.338282
RA	Adenosine 5'-monophosphate (AMP) to EDTA ratio	0.0212333	0.0184395	0.282772
RA	X-23648 levels	-0.00555534	0.0221896	0.807379
RA	X-17438 levels	-0.0184459	0.0165877	0.284862
RA	Eicosenoate (20:1) levels	0.0340049	0.0273108	0.233532
RA	Inosine to theophylline ratio	0.0269272	0.0197611	0.193105
RA	S-methylmethionine levels	0.00707749	0.018977	0.714079
RA	X-23974 levels	-0.0137044	0.027289	0.626405
RA	3-hydroxypyridine sulfate levels	-0.00444974	0.0144233	0.761236
RA	5-acetylamino-6-amino-3-methyluracil levels	-0.0216215	0.00786025	0.0113847
RA	Taurine to cysteine ratio	-0.0227707	0.0236509	0.349153
RA	Methyl indole-3-acetate levels	0.0249164	0.0178682	0.18846
RA	2R,3R-dihydroxybutyrate levels	-0.0024221	0.0123151	0.845971
RA	Docosadienoate (22:2n6) levels	-0.0310395	0.0191372	0.12564
RA	Adenosine 5'-diphosphate (ADP) to glutamate ratio	0.0131373	0.0115156	0.265684
RA	Phosphate to urate ratio	-0.00695016	0.00946553	0.46912
RA	Adenosine 5'-monophosphate (AMP) to leucine ratio	0.0226441	0.0370361	0.556057
RA	Mannose to fructose ratio	-0.0293112	0.0187076	0.143138
RA	Ursodeoxycholate levels	0.0157897	0.0232245	0.508514
RA	Spermidine to carnitine ratio	-0.00733267	0.0163447	0.661694
RA	5-dodecenoate (12:1n7) levels	-0.017432	0.0207821	0.421181
RA	Alpha-tocopherol levels	-0.0106332	0.0120226	0.38697
RA	Undecenoylcarnitine (C11:1) levels	0.0250563	0.0096332	0.0156679
RA	Sulfate levels	0.0212551	0.0136015	0.131214
RA	5-hydroxy-2-methylpyridine sulfate levels	0.00782617	0.0168208	0.648424
RA	Threonine to pyruvate ratio	-0.0046589	0.0186875	0.8058
RA	Gamma-glutamylleucine levels	0.0192272	0.0399555	0.647409
RA	Leucine to phosphate ratio	-0.0110807	0.0161102	0.499888
RA	Dihydroferulic acid sulfate levels	-0.00319395	0.0150898	0.83542
RA	Laurylcarnitine levels	0.00414469	0.0187953	0.828095
RA	Alanine to pyruvate ratio	0.00905349	0.0350323	0.800845
RA	Serine to alpha-tocopherol ratio	-0.0122026	0.0110792	0.282627
RA	Oleoylcarnitine levels	0.0150889	0.0140814	0.30086
RA	X-23654 levels	-0.00634424	0.0100442	0.532939
RA	Androstenediol (3beta,17beta) disulfate (1) levels	-0.00530006	0.0112746	0.643378
RA	Glycosyl ceramide (d18:1/20:0,d16:1/22:0) levels	-0.0159507	0.00931457	0.0987173
RA	5-methylthioadenosine (mta) levels	-0.00347605	0.0183086	0.851333
RA	N-methyl-2-pyridone-5-carboxamide levels	-0.00111522	0.0141511	0.938386
RA	Cysteine levels	0.0441408	0.0297051	0.175594
RA	Taurine levels	-0.00418686	0.0253421	0.872427
RA	Carnitine to acetylcarnitine (C2) ratio	0.00118741	0.0135771	0.931547
RA	N-stearoyl-sphingosine (d18:1/18:0) levels	0.0233908	0.0152496	0.145884
RA	3-hydroxymyristate levels	-0.0142112	0.0201237	0.491655
RA	X-23655 levels	0.042188	0.0249532	0.110282
RA	Salicylate to citrate ratio	-0.0126381	0.0171864	0.47625
RA	Acisoga levels	0.00640254	0.0140847	0.65485
RA	Beta-hydroxyisovaleroylcarnitine levels	-0.00518829	0.0117092	0.661507
RA	X-12410 levels	-0.00831274	0.0164203	0.619587
RA	Arginine to ornithine ratio	0.00759652	0.0140886	0.595422
RA	N-palmitoyl-sphingosine (d18:1 to 16:0) to N-stearoyl-sphingosine (d18:1 to 18:0) ratio	-0.00819323	0.011351	0.480225
RA	Androsterone glucuronide to etiocholanolone glucuronide ratio	-0.0015359	0.00746676	0.838628
RA	2-aminobutyrate levels	-0.0124621	0.0238832	0.61131
RA	10-heptadecenoate (17:1n7) levels	0.0444256	0.0224857	0.071637
RA	X-07765 levels	0.00382277	0.0185869	0.839357
RA	Theophylline to EDTA ratio	0.0165695	0.0235512	0.50808
RA	Succinate to proline ratio	-0.01566	0.015266	0.329155
RA	X-11308 levels	0.0102792	0.0109106	0.356838
RA	Glutamine to asparagine ratio	-0.00832388	0.0133709	0.541396
RA	2-o-methylascorbic acid levels	-0.00312254	0.0212709	0.885018
RA	Lysine levels	0.0131571	0.0143173	0.36656
RA	Adenosine 5'-monophosphate (AMP) to tyrosine ratio	-0.00278921	0.0207209	0.895153
RA	X-24757 levels	0.00461449	0.0172916	0.792983
RA	Palmitoleoylcarnitine (C16:1) levels	-0.0186795	0.0157551	0.260753
RA	Stearidonate (18:4n3) levels	-0.0184634	0.0164208	0.279759
RA	X-11795 levels	-0.00408004	0.0226755	0.865954
RA	X-11847 levels	-0.00607417	0.0166167	0.721066
RA	2-naphthol sulfate levels	0.0027667	0.0167663	0.871679
RA	1-(1-enyl-palmitoyl)-2-linoleoyl-GPC (p-16:0/18:2) levels	0.0111382	0.017506	0.53361
RA	X-16935 levels	0.0302192	0.0132678	0.0389665
RA	Glutamine degradant levels	-0.00333088	0.0109676	0.764344
RA	Inosine 5'-monophosphate (IMP) to phosphate ratio	-0.00250371	0.0182731	0.892969
RA	Urea levels	-0.0144545	0.0147644	0.340549
RA	Succinoyltaurine levels	0.00517262	0.00843464	0.547823
RA	2-acetamidophenol sulfate levels	-0.00671146	0.0254289	0.795971
RA	X-21364 levels	0.00522106	0.016232	0.750752
RA	1,5-anhydroglucitol (1,5-ag) levels	-0.00550225	0.0135883	0.68983
RA	2-hydroxyhippurate (salicylurate) levels	0.0241837	0.019894	0.244229
RA	Glutamine levels	-0.0167519	0.0111691	0.150088
RA	Pyruvate to N-acetylneuraminate ratio	0.00304458	0.0159338	0.850493
RA	Proline to glutamate ratio	0.020115	0.02027	0.340616
RA	Indole-3-carboxylate levels	-0.0386743	0.0216151	0.111371
RA	Phosphate to serine ratio	-0.0289149	0.0278086	0.316066
RA	Orotidine levels	0.0124446	0.0191571	0.52415
RA	X-18888 levels	-0.0238422	0.0274585	0.400976
RA	X-21607 levels	-0.00785528	0.0128341	0.547391
RA	N-oleoylserine levels	0.0118705	0.0138802	0.406835
RA	5alpha-androstan-3beta,17alpha-diol disulfate levels	-0.0145715	0.0176003	0.418
RA	Adenosine 5'-monophosphate (AMP) to flavin adenine dinucleotide (FAD) ratio	0.00612807	0.0304112	0.846033
RA	Hydroxypalmitoyl sphingomyelin (d18:1/16:0(OH)) levels	0.0163728	0.00763281	0.0432454
RA	Stearoylcholine levels	0.0214723	0.0191916	0.29218
RA	1-methyl-5-imidazoleacetate levels	-0.0170783	0.0111499	0.142077
RA	3-methoxytyrosine levels	0.0171997	0.0126659	0.191259
RA	Histidine to pyruvate ratio	-0.0175301	0.0221784	0.443466
RA	Dodecanedioate levels	-0.0251197	0.0148077	0.108045
RA	1-methylhistidine levels	-0.00525121	0.0132363	0.695073
RA	N-stearoyl-sphinganine (d18:0/18:0) levels	0.0233384	0.0202048	0.291972
RA	Cerotoylcarnitine (C26) levels	0.0130927	0.00982282	0.193316
RA	Methylsuccinoylcarnitine levels	-0.0101016	0.00865597	0.253409
RA	X-21312 levels	-0.00756627	0.0207291	0.719608
RA	5alpha-androstan-3beta,17beta-diol disulfate levels	0.0221003	0.0109008	0.0543619
RA	Bilirubin degradation product,C17H18N2O4 (3) levels	-0.00293125	0.00812336	0.722938
RA	Glutarate (C5-DC) to salicylate ratio	0.0142172	0.0324983	0.674946
RA	X-23678 levels	0.0485562	0.0180901	0.0178012
RA	Prolylglycine levels	-0.00313551	0.0113735	0.785362
RA	Glucuronate to androsterone glucuronide ratio	-0.0377459	0.0147275	0.0208496
RA	Proline to trans-4-hydroxyproline ratio	-0.00697987	0.0150087	0.647794
RA	Arachidoylcarnitine (C20) levels	0.0263242	0.0149072	0.089629
RA	X-21319 levels	0.0125507	0.0261385	0.645754
RA	4-hydroxyphenylpyruvate levels	0.0164108	0.0204188	0.435
RA	5alpha-androstan-3alpha,17beta-diol disulfate levels	0.0254726	0.0154591	0.115028
RA	X-13695 levels	0.0228923	0.0227283	0.34014
RA	Inosine 5'-monophosphate (IMP) levels	-0.0179524	0.0201461	0.387928
RA	Salicylate to taurocholate ratio	-0.00322238	0.0163941	0.846649
RA	1-stearoyl-GPI (18:0) levels	-0.0160322	0.0218351	0.476905
RA	Thyroxine to taurocholate ratio	-0.0189036	0.0220183	0.408913
RA	X-24811 levels	0.0273366	0.0131898	0.0507144
RA	Plasma free asparagine levels	0.0246008	0.0183265	0.199442
RA	Glycosyl ceramide (d18:2/24:1,d18:1/24:2) levels	-0.000938004	0.00826651	0.910497
RA	N-acetyl-2-aminoadipate levels	0.0192245	0.00921474	0.0506709
RA	1-palmitoyl-2-arachidonoyl-GPI (16:0/20:4) levels	0.0021475	0.0202965	0.916845
RA	1,3,7-trimethylurate levels	0.0275785	0.0189119	0.164119
RA	X-12013 levels	-0.0171127	0.0145326	0.255204
RA	Bilirubin degradation product,C17H18N2O4 (2) levels	-0.00613808	0.00788172	0.445229
RA	X-15523 levels	-0.00440096	0.0149623	0.770496
RA	5-(galactosylhydroxy)-L-lysine levels	0.0376024	0.0402579	0.386333
RA	Sphingomyelin (d18:1/22:2,d18:2/22:1,d16:1/24:2) levels	-0.0130138	0.0282665	0.653464
RA	1-palmitoyl-2-docosahexaenoyl-gpc (16:0/22:6) levels	-0.032183	0.021315	0.153313
RA	N-acetylglucosaminylasparagine levels	0.000924987	0.00741246	0.901937
RA	Glucose to mannitol to sorbitol ratio	-0.04298	0.0184238	0.0321998
RA	Alanine to asparagine ratio	0.0082823	0.00847292	0.336405
RA	Threonine levels	0.0043175	0.0204091	0.834407
RA	Glycerol 3-phosphate levels	-0.0213629	0.0189918	0.273347
RA	3-methyl-2-oxovalerate levels	0.0123998	0.0260342	0.643188
RA	Glutarylcarnitine (c5-dc) levels	-0.0252094	0.0104113	0.0217206
RA	N-methylproline levels	0.00200832	0.0138737	0.886711
RA	Cholesterol levels	0.0184897	0.0136647	0.200968
RA	X-24241 levels	0.0131636	0.0155848	0.409398
RA	3,5-dichloro-2,6-dihydroxybenzoic acid levels	-0.00436002	0.0140714	0.761991
RA	Glycocholenate sulfate levels	0.00282817	0.00991196	0.778061
RA	X-13723 levels	0.0177517	0.0267804	0.522402
RA	Tetradecanedioate (C14-DC) levels	0.00203143	0.00977869	0.839228
RA	Sphingomyelin (d18:0/20:0,d16:0/22:0) levels	-0.0146394	0.0072684	0.0540595
RA	Adenosine 5'-diphosphate (ADP) to glucose ratio	0.0435867	0.0175806	0.0265072
RA	N2,N5-diacetylornithine levels	0.0028388	0.0256376	0.913209
RA	17alpha-hydroxypregnanolone glucuronide levels	-0.00311688	0.0130289	0.813249
RA	1H-indole-7-acetic acid levels	-9.27451e-05	0.0151137	0.995171
RA	Glutamate levels	-0.0485874	0.0186001	0.0188666
RA	Succinate to trans-4-hydroxyproline ratio	0.0018142	0.0185402	0.923665
RA	Phenylacetate levels	0.00231344	0.0162956	0.889129
RA	Cysteine-glutathione disulfide levels	0.00399435	0.0120459	0.7445
RA	X-15486 levels	0.00990577	0.0153156	0.533922
RA	Bilirubin degradation product,C17H18N2O4 (1) levels	0.00146179	0.008071	0.857797
RA	Cysteinylglycine disulfide levels	0.0189612	0.0149816	0.231796
RA	Retinol (Vitamin A) to oleoyl-linoleoyl-glycerol (18:1 to 18:2) [2] ratio	0.00979156	0.0204491	0.636786
RA	2-ketocaprylate levels	0.00156836	0.0170156	0.927526
RA	Cholate to phosphate ratio	0.0178006	0.0395295	0.663136
RA	N-acetylaspartate (naa) levels	-0.00990459	0.016826	0.566185
RA	Sphingomyelin (d17:2/16:0,d18:2/15:0) levels	0.00722352	0.0133132	0.592872
RA	S-1-pyrroline-5-carboxylate levels	0.0308693	0.0230499	0.207508
RA	X-23276 levels	0.0154577	0.0182085	0.411284
RA	Glycosyl-N-behenoyl-sphingadienine (d18:2/22:0) levels	-0.0120297	0.00841543	0.1683
RA	N-acetylhistidine levels	-0.000395429	0.00871619	0.964343
RA	4-methyl-2-oxopentanoate to 3-methyl-2-oxobutyrate ratio	-0.00611289	0.0200883	0.765715
RA	Spermidine to taurocholate ratio	-0.0325381	0.0195761	0.127467
RA	Adenosine 5'-diphosphate (ADP) to uridine ratio	-0.00310424	0.0258057	0.906634
RA	3-methyl catechol sulfate (1) levels	-0.00462914	0.0180063	0.800199
RA	3-hydroxylaurate levels	-0.0422471	0.0447515	0.398605
RA	N-acetylglucosamine/n-acetylgalactosamine levels	0.0059396	0.0114893	0.614574
RA	Phenylalanine to phosphate ratio	0.0472955	0.0169517	0.0137335
RA	X-17335 levels	-0.00070686	0.0322798	0.983141
RA	N-acetyltaurine levels	-0.00245699	0.011723	0.837009
RA	Androstenediol (3beta,17beta) monosulfate (2) levels	-0.00100566	0.0172768	0.95416
RA	N,N-dimethylalanine levels	0.0151039	0.0206206	0.474479
RA	Cortisone to cortisol ratio	-0.00545343	0.015728	0.735978
RA	Bilirubin degradation product,C16H18N2O5 (3) levels	0.00675882	0.00806232	0.412273
RA	Citrate levels	0.00924986	0.0202293	0.65328
RA	Pyridoxate levels	0.0103892	0.0172793	0.55886
RA	Taurochenodeoxycholate levels	0.0082103	0.0249276	0.746755
RA	3-hydroxy-2-ethylpropionate levels	0.010342	0.0160762	0.527328
RA	Glycerol levels	0.0156371	0.0260225	0.558234
RA	1-(1-enyl-palmitoyl)-2-arachidonoyl-GPE (p-16:0/20:4) levels	-0.0342787	0.0155776	0.0438521
RA	Nonanoylcarnitine (C9) levels	-0.00164223	0.0104034	0.876676
RA	Gamma-tocopherol/beta-tocopherol levels	-0.0246897	0.0152553	0.127868
RA	Isoleucine levels	-0.0297578	0.0271722	0.291932
RA	Choline phosphate to phosphoethanolamine ratio	-0.0142372	0.0136396	0.313104
RA	1-myristoyl-2-arachidonoyl-GPC (14:0/20:4) levels	-0.0249012	0.00822687	0.00801789
RA	1-oleoyl-GPI (18:1) levels	0.00317828	0.0146882	0.830881
RA	Citrulline to dimethylarginine (SDMA + ADMA) ratio	-0.00144888	0.0163413	0.930328
RA	3-ureidopropionate levels	-0.00463076	0.017394	0.793945
RA	Cis-4-decenoate (10:1n6) levels	0.00941049	0.00837128	0.277537
RA	Octadecenedioate (C18:1-DC) levels	0.00207669	0.0117558	0.862145
RA	Adenosine 5'-monophosphate (AMP) levels	0.0125607	0.0206032	0.557171
RA	Ceramide (d18:1/24:1) levels	0.0125607	0.0131808	0.350969
RA	Creatine levels	0.0170549	0.017631	0.346944
RA	Bilirubin (Z,Z) to androsterone glucuronide ratio	-0.00573319	0.00707931	0.424855
RA	Tartarate levels	-0.0169658	0.0145149	0.261979
RA	Homovanillate (hva) levels	-0.0263426	0.0155246	0.105238
RA	X-24728 levels	0.00581055	0.0155351	0.712133
RA	Formiminoglutamate levels	-0.012611	0.0175244	0.480517
RA	N-acetylputrescine to (N(1) + N(8))-acetylspermidine ratio	-0.0166859	0.00744711	0.0379049
RA	Imidazole propionate levels	-0.00568946	0.0182542	0.758678
RA	Uridine to 2'-deoxyuridine ratio	-0.021291	0.0150048	0.169926
RA	Alpha-ketoglutarate to alanine ratio	0.00726224	0.0153965	0.645615
RA	Alpha-hydroxyisocaproate levels	0.00393182	0.0160392	0.809284
RA	X-21467 levels	0.0152955	0.00955467	0.124348
RA	Creatine to carnitine ratio	0.0325819	0.0217528	0.160014
RA	Adenosine 5'-monophosphate (AMP) to threonine ratio	-0.00446185	0.0216354	0.839581
RA	Adrenate (22:4n6) levels	-0.0192002	0.0198664	0.349135
RA	Histidine betaine (hercynine) levels	-0.0146858	0.0239193	0.552943
RA	Cystine levels	0.0142945	0.0196114	0.480055
RA	Gamma-glutamylthreonine levels	0.0189508	0.0167427	0.268425
RA	Docosatrienoate (22:3n6) levels	0.00189384	0.0301108	0.951393
RA	Glutamate to kynurenine ratio	5.41259e-05	0.0151066	0.997179
RA	3-methyladipate levels	-0.00389446	0.016011	0.81135
RA	Phosphate to sulfate ratio	-0.0110994	0.01632	0.504637
RA	3-(3-hydroxyphenyl)propionate sulfate levels	0.0225645	0.0183596	0.242617
RA	Indoleacetylglutamine levels	0.0143717	0.0157892	0.378109
RA	Fructose to sucrose ratio	-0.00230176	0.0142613	0.873799
RA	Maltose levels in coronary artery disease	0.0183469	0.019416	0.360716
RA	5-hydroxyhexanoate levels	-0.0289396	0.0174841	0.12012
RA	Gamma-glutamylvaline levels	-0.00850614	0.019689	0.670854
RA	2-hydroxypalmitate levels	0.0136588	0.0208543	0.525951
RA	N-acetylmethionine levels	-0.015095	0.0274393	0.59934
RA	Adenosine 5'-diphosphate (ADP) to oxalate (ethanedioate) ratio	0.0173987	0.0162151	0.299194
RA	X-24801 levels	-0.00335427	0.0106097	0.754513
RA	X-14056 levels	-0.00151449	0.0263241	0.955068
RA	1-linoleoylglycerol (18:2) levels	-0.0183576	0.0196286	0.365512
RA	Caprate (10:0) levels	-0.00126177	0.014733	0.934149
RA	X-24494 levels	-0.0035574	0.0121012	0.771808
RA	N-formylanthranilic acid levels	0.00327703	0.0116058	0.780887
RA	3-methoxytyramine sulfate levels	-0.00223224	0.0128624	0.865114
RA	Cinnamoylglycine levels	0.0189226	0.0123784	0.140597
RA	Cholesterol to benzoate ratio	-0.0244142	0.034721	0.513343
RA	Cholesterol to linoleoyl-arachidonoyl-glycerol (18:2 to 20:4) [1] ratio	0.0105406	0.0156366	0.509871
RA	X-21834 levels	0.0341085	0.0178416	0.0765974
RA	Sphingomyelin (d18:1/17:0,d17:1/18:0,d19:1/16:0) levels	-0.00342193	0.0132664	0.798851
RA	Glucuronide of piperine metabolite C17H21NO3 (5) levels	-0.0114367	0.0183679	0.544284
RA	1-palmitoleoyl-2-linolenoyl-GPC (16:1/18:3) levels	0.0186611	0.0126297	0.15894
RA	Docosahexaenoylcarnitine (C22:6) levels	0.0112269	0.0182469	0.544684
RA	N-methyltaurine levels	0.0142366	0.0169895	0.413677
RA	Caproate (6:0) levels	-0.0101278	0.0278443	0.722386
RA	Sphingomyelin (d18:2/23:1) levels	-0.00277201	0.0249293	0.91304
RA	Phosphate to glutamate ratio	0.0242545	0.0196844	0.235687
RA	1-(1-enyl-palmitoyl)-2-palmitoleoyl-GPC (P-16:0/16:1) levels	-0.00684334	0.0070507	0.339778
RA	Methyl glucopyranoside (alpha + beta) levels	-0.0133908	0.00858528	0.136229
RA	Trans-4-hydroxyproline levels	0.0201039	0.0136562	0.161651
RA	Glycocholate glucuronide (1) levels	-0.0226876	0.01815	0.235125
RA	Adenosine 5'-diphosphate (ADP) to aspartate ratio	0.0230329	0.0163524	0.178109
RA	Salicyluric glucuronide levels	-0.0381712	0.0204426	0.0988255
RA	Adenosine 5'-diphosphate (ADP) to Adenosine 5'-monophosphate (AMP) ratio	0.00452462	0.0127586	0.72815
RA	Sphingomyelin (d18:1/20:1,d18:2/20:0) levels	-0.00589054	0.0129192	0.654552
RA	1-oleoyl-GPG (18:1) levels	0.000729801	0.0100602	0.942928
RA	Linoleoylcholine levels	-0.00885351	0.0266767	0.745268
RA	S-adenosylhomocysteine (SAH) to leucine ratio	0.0209793	0.0131433	0.127853
RA	Taurocholate to oxalate (ethanedioate) ratio	-0.0313129	0.0218311	0.171999
RA	Sphingomyelin (d18:2/23:0,d18:1/23:1,d17:1/24:1) levels	-0.0145951	0.0186566	0.444207
RA	Choline to taurocholate ratio	0.0169233	0.0180279	0.36638
RA	Taurodeoxycholic acid 3-sulfate levels	0.0123645	0.00912302	0.193056
RA	Sphingomyelin (d18:2/16:0,d18:1/16:1) levels	-0.0291871	0.0211343	0.188917
RA	N-lactoyl tyrosine levels	-0.0199238	0.0155712	0.216957
RA	Salicylate to caprylate (8:0) ratio	0.00965119	0.0133078	0.481165
RA	N-acetylalliin levels	-0.0219684	0.0194806	0.274251
RA	Plasma lactate levels	-0.0470154	0.0217939	0.0519638
RA	Pentadecanoate (15:0) levels	0.00952589	0.01846	0.616049
RA	2-hydroxysebacate levels	0.0181459	0.0291147	0.547067
RA	Arachidonate (20:4n6) to pyruvate ratio	0.0294887	0.0322612	0.387404
RA	Docosapentaenoate n3 DPA; 22:5n3 levels	-0.0259309	0.0133716	0.0703139
RA	(R)-3-hydroxybutyrylcarnitine levels	0.0408477	0.0199516	0.0613899
RA	1,7-dimethyluric acid levels	-0.017599	0.0129193	0.186913
RA	Palmitate (16:0) to myristate (14:0) ratio	-0.0258297	0.0192863	0.205295
RA	Pseudouridine levels	-0.00200697	0.0174513	0.909967
RA	Hexadecenedioate (C16:1-DC) levels	0.00182958	0.0076897	0.813958
RA	Cholate to adenosine 5'-monophosphate (AMP) ratio	0.0141425	0.0260174	0.596686
RA	Thyroxine levels	-0.0138568	0.021727	0.533918
RA	Glycine conjugate of C10H12O2 levels	-0.00119771	0.0163838	0.942577
RA	Gamma-glutamylcitrulline levels	0.0100723	0.016479	0.548297
RA	2,6-dihydroxybenzoic acid levels	0.00731727	0.0219876	0.743361
RA	2-hydroxybutyrate/2-hydroxyisobutyrate levels	-0.0201531	0.0238701	0.420386
RA	Glycerol to carnitine ratio	0.0050836	0.0194147	0.796261
RA	Indolelactate levels	-0.0155654	0.0123048	0.221174
RA	Linolenate [alpha or gamma; (18:3n3 or 6)] levels	0.00218434	0.0214224	0.92102
RA	Serine to threonine ratio	0.0239789	0.012313	0.0734096
RA	Serine to pyruvate ratio	-0.0105575	0.0190086	0.590823
RA	X-12906 levels	-0.0162933	0.0148604	0.290185
RA	3-hydroxyoleoylcarnitine levels	0.01456	0.0163606	0.383578
RA	Ergothioneine levels	-0.0283251	0.018197	0.139128
RA	N-palmitoylglycine levels	-0.00159437	0.0110659	0.887132
RA	4-hydroxyglutamate levels	0.0211497	0.0142862	0.159456
RA	Fructosyllysine levels	0.00628313	0.0145892	0.672118
RA	4-allylcatechol sulfate levels	-0.012404	0.0179855	0.502529
RA	Suberate (C8-DC) levels	-0.0220224	0.0178237	0.240261
RA	Inosine to EDTA ratio	0.0321322	0.0128759	0.0225165
RA	X-13684 levels	0.0111408	0.0125776	0.385322
RA	X-24337 levels	-0.0156932	0.0139634	0.274374
RA	Glycodeoxycholate levels	0.00125472	0.0127772	0.923395
RA	N-acetylvaline levels	0.00272544	0.0191185	0.889473
RA	1-(1-enyl-stearoyl)-2-oleoyl-GPE (p-18:0/18:1) levels	-0.0276441	0.0201656	0.195515
RA	2-palmitoyl-GPC (16:0) levels	-0.019138	0.0166692	0.288643
RA	X-23644 levels	0.0183479	0.0205735	0.39344
RA	1-linoleoyl-2-linolenoyl-GPC (18:2/18:3) levels	0.0149298	0.0108056	0.187307
RA	12,13-DiHOME levels	0.0178436	0.0141772	0.222663
RA	Andro steroid monosulfate C19H28O6S (1) levels	0.00915754	0.0095196	0.343756
RA	X-12816 levels	0.000724328	0.013406	0.957422
RA	Bilirubin degradation product,C16H18N2O5 (4) levels	0.00814446	0.00785923	0.316484
RA	Octanoylcarnitine (c8) levels	-0.0163363	0.0105284	0.138151
RA	(S)-3-hydroxybutyrylcarnitine levels	-0.0123944	0.0181242	0.504492
RA	Histidine to alanine ratio	-0.00425033	0.0229361	0.855056
RA	X-25217 levels	0.010706	0.0220827	0.635874
RA	Palmitoleate (16:1n7) levels	0.0518988	0.019415	0.0166635
RA	Gamma-glutamylalanine levels	0.0113813	0.0254928	0.664784
RA	3-hydroxyoctanoylcarnitine (1) levels	0.00958248	0.022651	0.683403
RA	X-12104 levels	-0.00795458	0.0192657	0.689351
RA	Dihomo-linoleate (20:2n6) levels	-0.00354348	0.0233678	0.882217
RA	Allantoin levels	-0.00119171	0.0206553	0.954627
RA	Taurine to glutamate ratio	0.0197045	0.0233454	0.416625
RA	Glycerate levels	-0.00650419	0.016131	0.691543
RA	Ceramide (d18:1/17:0,d17:1/18:0) levels	-0.00860698	0.0143528	0.559031
RA	1-stearoyl-2-oleoyl-GPI (18:0/18:1) levels	-0.0112133	0.0242782	0.652439
RA	Decanoylcarnitine (C10) levels	0.00151517	0.0103117	0.885138
RA	3-(4-hydroxyphenyl)lactate levels	-0.0121195	0.0147371	0.42056
RA	Glutamate to glutamine ratio	-0.0112299	0.0134997	0.417728
RA	Aconitate [cis or trans] levels	0.000273447	0.0142337	0.98491
RA	Glycochenodeoxycholate 3-sulfate levels	-0.0169588	0.00953369	0.0890915
RA	Orotate levels	-0.0284981	0.00840586	0.00276039
RA	Cholesterol to oleoyl-linoleoyl-glycerol (18:1 to 18:2) [2] ratio	-0.015566	0.0187171	0.41416
RA	N-methylhydroxyproline levels	0.0284052	0.0264415	0.323996
RA	Lignoceroylcarnitine (C24) levels	0.0217426	0.0129645	0.110807
RA	Alpha-tocopherol to glycerol ratio	0.00452557	0.0164131	0.786785
RA	Carnitine C14 levels	-0.0325073	0.0202683	0.128302
RA	3-phosphoglycerate to glycerate ratio	0.0227355	0.0187954	0.249712
RA	Sphingomyelin (d17:1/14:0,d16:1/15:0) levels	0.00671995	0.0131602	0.616179
RA	Histidine levels	-0.021377	0.0189314	0.276556
RA	Laurate (12:0) levels	0.0110851	0.0228605	0.637258
RA	1-stearoyl-2-linoleoyl-GPI (18:0/18:2) levels	0.010193	0.00997557	0.319078
RA	Sphingomyelin (d18:1/24:1,d18:2/24:0) levels	0.00478204	0.0284187	0.868618
RA	X-12822 levels	0.00959135	0.0105337	0.37795
RA	3-methylcytidine levels	0.0132722	0.00972112	0.193698
RA	X-21471 levels	0.000701364	0.0113548	0.951687
RA	Pregnenetriol disulfate levels	0.0114664	0.0104314	0.293235
RA	Adenosine 5'-diphosphate (ADP) to 2'-deoxyuridine ratio	0.0249279	0.0169529	0.158712
RA	Adenosine 5'-diphosphate (ADP) to tyrosine ratio	-0.00727878	0.0144992	0.623461
RA	Adenosine 5'-diphosphate (ADP) to pantothenate ratio	0.0264899	0.0257197	0.32992
RA	Indolebutyrate levels	-0.0201496	0.020056	0.330011
RA	Glycerol to glycerol 3-phosphate ratio	0.0176616	0.0215397	0.425078
RA	Methionine levels	0.0233692	0.0502365	0.651766
RA	Pyruvate levels	-0.0283103	0.025979	0.295618
RA	X-12701 levels	-0.0111298	0.0207592	0.606444
RA	Carnitine to ergothioneine ratio	0.0175076	0.0145873	0.24998
RA	Margaroylcarnitine (C17) levels	-0.0573563	0.0307023	0.0801665
RA	Phenylacetylglutamine levels	-0.0320995	0.0182456	0.103972
RA	1-lignoceroyl-GPC (24:0) levels	0.0195498	0.0191168	0.326646
RA	Cytosine levels	0.0324156	0.0236344	0.203426
RA	X-11444 levels	-0.000279503	0.00741066	0.970141
RA	Arachidonate (20:4n6) to linoleate (18:2n6) ratio	-0.011562	0.0108025	0.302586
RA	X-12101 levels	0.0227541	0.0138644	0.118115
RA	5alpha-pregnan-3beta,20beta-diol monosulfate (1) levels	-0.0119584	0.00790391	0.143346
RA	Glucuronide of C12H22O4 (1) levels	-0.00599895	0.0256787	0.819574
RA	Nonadecanoate (19:0) levels	-0.00971486	0.016195	0.556995
RA	Picolinate levels	-0.00751255	0.00902403	0.417378
RA	X-19141 levels	-0.00124049	0.012623	0.9225
RA	X-17676 levels	0.0223383	0.0119481	0.0825985
RA	X-11858 levels	0.0266913	0.0116781	0.0339395
RA	3-hydroxysebacate levels	0.021101	0.0245026	0.404746
RA	Bilirubin (Z,Z) to taurocholate ratio	0.0428398	0.0204329	0.0654778
RA	Deoxycarnitine levels	-0.000157982	0.00830774	0.984979
RA	Indolepropionate levels	0.0251922	0.0194482	0.219566
RA	X-26109 levels	0.0108256	0.00998674	0.287613
RA	Isovalerylcarnitine (C5) levels	0.00330893	0.0135854	0.810048
RA	3-methylglutarylcarnitine (2) levels	0.00564187	0.00855583	0.515426
RA	X-12407 levels	0.026046	0.018965	0.189818
RA	N2-acetyl,N6,N6-dimethyllysine levels	0.00285102	0.00726206	0.698577
RA	X-25371 levels	-0.0107799	0.0103631	0.309051
RA	N-acetyl-2-aminooctanoate levels	0.00279288	0.0100533	0.784013
RA	Succinate levels	0.0288418	0.0193196	0.159337
RA	phosphate to asparagine ratio	-0.00283853	0.0150117	0.851757
RA	Glycolithocholate sulfate levels	-0.00324731	0.0147697	0.829151
RA	Anthranilate levels	-0.0399784	0.0189157	0.0496434
RA	N-acetylthreonine levels	0.00177092	0.01714	0.918791
RA	Theophylline to theobromine ratio	-0.0258012	0.0266139	0.353147
RA	4-vinylphenol sulfate levels	-0.0104474	0.0190765	0.592549
RA	N-lactoyl isoleucine levels	0.0024191	0.0241787	0.922281
RA	Cortisol to 4-cholesten-3-one ratio	-0.0267974	0.0198033	0.203153
RA	1-methyl-4-imidazoleacetate levels	5.00589e-05	0.00990526	0.996013
RA	Arachidonate (20:4n6) to caffeine ratio	-0.00360732	0.0188162	0.850929
RA	Guanidinoacetate levels	0.00939474	0.0139465	0.509605
RA	Docosahexaenoate DHA; 22:6n3 levels	0.0123487	0.0268375	0.651616
RA	Glucose to N-palmitoyl-sphingosine (d18:1 to 16:0) ratio	-0.0476503	0.0178462	0.0174763
RA	X-13844 levels	-0.00087973	0.0200203	0.965619
RA	Tartronate (hydroxymalonate) levels	0.0184138	0.0184346	0.334811
RA	Uridine levels	0.0528272	0.0224688	0.03841
RA	Adenosine 5'-diphosphate (ADP) to glycerate ratio	0.0328545	0.0170465	0.0760742
RA	Serotonin levels	0.00883634	0.0188985	0.64847
RA	3-hydroxyoctanoate levels	0.0187899	0.0335073	0.583818
RA	X-18913 levels	-0.0170276	0.0190001	0.389343
RA	X-12729 levels	-0.0236283	0.0196709	0.252852
RA	Sulfate of piperine metabolite C18H21NO3 (1) levels	0.0157354	0.0208803	0.466915
RA	3-methylxanthine levels	-0.00198705	0.0182866	0.915013
RA	X-12839 levels	0.00813797	0.0143897	0.578323
RA	X-12707 levels	0.0161407	0.0156083	0.314069
RA	X-21796 levels	-0.000941927	0.0164047	0.95473
RA	Spermidine to choline ratio	-0.0181373	0.0130259	0.191308
RA	(2 or 3)-decenoate (10:1n7 or n8) levels	0.0119823	0.0200962	0.557698
RA	Carotene diol (3) levels	-0.0114001	0.0127682	0.383105
RA	Adenosine 5'-monophosphate (AMP) to urate ratio	0.0189351	0.0197576	0.350572
RA	Branched-chain,straight-chain,or cyclopropyl 12:1 fatty acid levels	-0.0140715	0.0200016	0.493268
RA	Leucine levels	-0.0186274	0.024048	0.453573
RA	Glycerophosphoethanolamine levels	0.0248047	0.021267	0.262959
RA	Phosphate to fructose ratio	0.00744131	0.0166077	0.664698
RA	Inosine levels	0.000318645	0.0164948	0.984905
RA	X-25420 levels	0.00927603	0.0247215	0.714631
RA	1-palmitoyl-2-linoleoyl-gpc (16:0/18:2) levels	0.00829343	0.00890072	0.359713
RA	Citrulline levels	0.00754254	0.026099	0.775713
RA	3-acetylphenol sulfate levels	0.0221437	0.0171687	0.216661
RA	Androstenediol (3beta,17beta) monosulfate (1) levels	-0.000594925	0.0128858	0.963633
RA	Androstenediol (3alpha,17alpha) monosulfate (3) levels	0.00247819	0.00683923	0.720713
RA	Adenosine 5'-monophosphate (AMP) to inosine 5'-monophosphate (IMP) ratio	-0.0141487	0.0122897	0.267645
RA	X-18886 levels	0.0360248	0.0284566	0.234226
RA	Ceramide (d18:1/14:0,d16:1/16:0) levels	-0.019446	0.0122072	0.124812
RA	Glycerol to mannitol to sorbitol ratio	-0.00839517	0.0112718	0.46551
RA	X-11880 levels	0.0308047	0.0213989	0.180555
RA	Aspartate to citrate ratio	0.0386298	0.0183217	0.052221
RA	Palmitoyl-sphingosine-phosphoethanolamine (d18:1/16:0) levels	0.0144452	0.0199561	0.477146
RA	Cortisone to 4-cholesten-3-one ratio	-0.0060287	0.0131719	0.65166
RA	Eugenol sulfate levels	-0.0394652	0.0199386	0.0693561
RA	X-17354 levels	0.00535537	0.0262834	0.842632
RA	X-23665 levels	-0.00940159	0.019794	0.647503
RA	4-hydroxycoumarin levels	-0.0201177	0.015694	0.218151
RA	1,2-dipalmitoyl-gpc (16:0/16:0) levels	-0.0163841	0.0099781	0.113109
RA	X-21355 levels	-0.0208561	0.0251733	0.431409
RA	Sphingomyelin (d18:2/24:2) levels	-0.000446609	0.0167269	0.979029
RA	3-methyl-2-oxovalerate to 4-methyl-2-oxopentanoate ratio	-0.0159608	0.0157604	0.326266
RA	Deoxycholic acid 12-sulfate levels	-0.000302832	0.0117773	0.979769
RA	X-24307 levels	0.0329875	0.0350187	0.37079
RA	X-24334 levels	-0.022114	0.0211108	0.315499
RA	X-17146 levels	0.0215201	0.0320277	0.516857
RA	Sphingomyelin (d18:2/18:1) levels	0.00085157	0.050974	0.987137
RA	3-methyl-2-oxobutyrate levels	0.00512556	0.026266	0.848086
RA	Arginine to glutamate ratio	-0.00757797	0.0151654	0.622489
RA	2-piperidinone levels	-0.0042067	0.019408	0.831323
RA	Bilirubin degradation product,C16H18N2O5 (2) levels	0.00591342	0.00785378	0.46314
RA	Tyramine O-sulfate levels	0.011181	0.0185704	0.558323
RA	Myo-inositol levels	-0.000805783	0.0115404	0.944966
RA	4-methoxyphenol sulfate levels	0.0063709	0.0153441	0.684765
RA	Phosphate to 5-oxoproline ratio	0.00167098	0.00846619	0.846374
RA	Lignoceroyl sphingomyelin (d18:1/24:0) levels	0.00565101	0.0155339	0.721454
RA	Behenoyl sphingomyelin (d18:1/22:0) levels	0.0324864	0.018844	0.106715
RA	N4-acetylcytidine levels	0.00214245	0.0105055	0.839879
RA	Caffeine to linoleate (18:2n6) ratio	0.0216313	0.0270828	0.454904
RA	Cis-3,4-methyleneheptanoylcarnitine levels	0.0206292	0.0131696	0.143226
RA	2-methoxyhydroquinone sulfate (2) levels	-0.068642	0.023057	0.0206006
RA	N-acetyl-L-alanine levels	-0.00563531	0.0133563	0.676422
RA	3-methyl-2-oxovalerate to 3-methyl-2-oxobutyrate ratio	-0.000540353	0.013642	0.968927
RA	Glutamine conjugate of C7H12O2 levels	0.0349486	0.0163955	0.0463142
RA	Carnitine levels	0.00507422	0.0111445	0.653347
RA	X-25172 levels	0.00405701	0.0153099	0.794025
RA	3,7-dimethylurate levels	0.00915741	0.0123623	0.465481
RA	Glutamine to alanine ratio	-0.00348757	0.0146201	0.813402
RA	Glycodeoxycholate 3-sulfate levels	0.00190791	0.00901643	0.834456
RA	1-palmitoyl-2-dihomo-linolenoyl-GPC (16:0/20:3n3 or 6) levels	0.0127109	0.00904789	0.180437
RA	X-12112 levels	-0.00060832	0.00656126	0.926727
RA	Betaine levels	-0.0105886	0.0172841	0.550694
RA	Aspartate to citrulline ratio	-0.060199	0.0245571	0.0341765
RA	Hexadecadienoate (16:2n6) levels	-0.00110236	0.0231431	0.963177
RA	Quinate levels	0.0131112	0.0172534	0.461971
RA	3-hydroxy-3-methylglutarate levels	0.00702809	0.0225231	0.759609
RA	2-hydroxyoctanoate levels	-0.0122503	0.0169349	0.482264
RA	Oxalate (ethanedioate) levels	-0.0112496	0.0150211	0.464772
RA	5-methylthioadenosine (MTA) to phosphate ratio	0.014707	0.013328	0.283603
RA	Cytidine to N-acetylglucosamine to N-acetylgalactosamine ratio	-0.0219104	0.0159012	0.188441
RA	4-acetylphenol sulfate levels	0.0082699	0.0177316	0.649286
RA	N-acetylproline levels	-0.0306321	0.0192226	0.133358
RA	Tridecenedioate (C13:1-DC) levels	-0.0351833	0.0252041	0.186119
RA	Sphingomyelin (d18:1/22:1,d18:2/22:0,d16:1/24:1) levels	0.00639313	0.0172922	0.716445
RA	Bilirubin degradation product,C16H18N2O5 (1) levels	0.00729408	0.0135498	0.599455
RA	1-linoleoyl-gpc (18:2) levels	0.00245264	0.0149102	0.871175
RA	7-alpha-hydroxy-3-oxo-4-cholestenoate (7-hoca) levels	0.000877015	0.0148524	0.95353
RA	X-24546 levels	0.0049055	0.00887763	0.588699
RA	N-acetylserine levels	0.000768036	0.0147138	0.958945
RA	Phosphate to valine ratio	-0.00825048	0.0137088	0.554043
RA	Cortisol levels (plasma)	-0.0403217	0.0178944	0.0396347
RA	Phosphate to glutamine ratio	-0.0222474	0.0118078	0.0734685
RA	Ethyl beta-glucopyranoside levels	-6.34329e-05	0.00996472	0.995046
RA	N6,n6,n6-trimethyllysine levels	-0.0122391	0.0164972	0.468904
RA	1-(1-enyl-palmitoyl)-2-oleoyl-GPE (p-16:0/18:1) levels	-0.0431692	0.0154831	0.0107201
RA	Ceramide (d18:1/16:0) levels	-0.00809352	0.0187297	0.670518
RA	Glutamate to 5-oxoproline ratio	-0.0404259	0.0197645	0.0587727
RA	Ferulic acid 4-sulfate levels	0.00134588	0.0113485	0.906625
RA	Erythronate levels	0.00628714	0.0163433	0.7078
RA	Phosphate to linoleoyl-arachidonoyl-glycerol (18:2 to 20:4) [1] ratio	0.0207875	0.00931049	0.0371608
RA	X-25109 levels	0.0194812	0.0135314	0.16403
RA	1-stearoyl-2-docosahexaenoyl-GPE (18:0/22:6) levels	0.0222047	0.0111939	0.0588475
RA	Phosphate to glycerol ratio	0.0145098	0.0285317	0.6233
RA	X-18922 levels	0.019716	0.0126494	0.1375
RA	Thioproline levels	0.0152226	0.0135716	0.279647
RA	3-carboxy-4-methyl-5-pentyl-2-furanpropionate (3-CMPFP) levels	-0.0182045	0.0134622	0.190028
RA	Docosatrienoate (22:3n3) levels	-0.01087	0.0160466	0.506767
RA	5alpha-androstan-3alpha,17beta-diol monosulfate (2) levels	-0.00168089	0.01307	0.898787
RA	Arachidonate (20:4n6) levels	-0.0175675	0.00929363	0.0740747
RA	1-(1-enyl-palmitoyl)-2-linoleoyl-GPE (p-16:0/18:2) levels	-0.0171548	0.0181046	0.355911
RA	X-17653 levels	-0.00745278	0.0134676	0.59016
RA	Sphingomyelin (d18:2/21:0,d16:2/23:0) levels	-0.00646849	0.0115675	0.580473
RA	X-24518 levels	-0.00795417	0.0080722	0.338256
RA	Carotenoid levels (cryptoxanthin)	-0.017043	0.0169646	0.329165
RA	3-indoxyl sulfate levels	-0.0120339	0.0139504	0.405255
RA	Hyocholate levels	-0.00504082	0.0335497	0.884287
RA	X-21845 levels	0.00568179	0.0171353	0.746434
RA	1-stearoyl-GPE (18:0) levels	-0.0115537	0.00882392	0.199737
RA	Sucrose levels	-0.0232661	0.051348	0.666397
RA	Adenosine 5'-monophosphate (AMP) to alanine ratio	-0.0067045	0.0224952	0.771226
RA	Imidazole lactate levels	-0.00164797	0.00854256	0.84888
RA	Glycine to alanine ratio	0.00252428	0.0112781	0.826376
RA	Pregnanediol-3-glucuronide levels	0.0128999	0.0126871	0.319001
RA	Oleoyl-linoleoyl-glycerol (18:1 to 18:2) [2] to linoleoyl-arachidonoyl-glycerol (18:2 to 20:4) [2] ratio	0.0116022	0.00699823	0.112947
RA	Citrate to taurocholate ratio	0.0162094	0.0234895	0.51594
RA	Dodecenedioate (C12:1-DC) levels	-0.014061	0.0213696	0.521219
RA	Stachydrine levels	-0.00956684	0.0202331	0.644175
RA	Glycoursodeoxycholate levels	0.0045514	0.0170111	0.792686
RA	S-adenosylhomocysteine (SAH) to 5-methyluridine (ribothymidine) ratio	-0.0456334	0.0161919	0.0129719
RA	Methyl vanillate sulfate levels	-0.00458321	0.0331774	0.892095
RA	Dimethyl sulfone levels	0.00371091	0.0185201	0.844071
RA	Benzoate to oleoyl-linoleoyl-glycerol (18:1 to 18:2) [2] ratio	0.0248774	0.017986	0.182657
RA	Caffeine to paraxanthine ratio	0.0280808	0.0174991	0.125053
RA	Perfluorooctanoate (PFOA) levels	0.0108437	0.0185111	0.569835
RA	Carnitine C5:1 levels	0.00490092	0.0130839	0.712351
RA	Adenosine 5'-diphosphate (ADP) to sulfate ratio	0.000725848	0.0155551	0.963359
RA	Pantoate levels	-0.0387361	0.0260999	0.161607
RA	N-oleoyltaurine levels	0.0339732	0.0159497	0.04904
RA	Vanillactate levels	-0.00804794	0.0129728	0.542789
RA	X-23780 levels	0.0074748	0.0113411	0.518665
RA	Heneicosapentaenoate (21:5n3) levels	0.0070545	0.0146269	0.639979
RA	X-21285 levels	0.0137203	0.0142039	0.344116
RA	11beta-hydroxyetiocholanolone glucuronide levels	0.0193596	0.014458	0.200502
RA	Phosphate to EDTA ratio	-0.00365418	0.0170233	0.832746
RA	Alanine levels	0.00218171	0.0143233	0.881274
RA	X-17685 levels	-0.0227668	0.0161878	0.181408
RA	X-12283 levels	-0.0113309	0.0191642	0.561318
RA	Glutamine conjugate of C6H10O2 (2) levels	-0.000227095	0.0220953	0.991968
RA	1-myristoyl-2-palmitoyl-gpc (14:0/16:0) levels	-0.00112818	0.0221875	0.960359
RA	4-cholesten-3-one levels	0.0165942	0.0206285	0.435613
RA	Cholate to taurocholate ratio	0.00920205	0.0193143	0.641113
RA	Androsterone sulfate levels	0.00324738	0.00688374	0.640638
RA	Cysteinylglycine to taurine ratio	0.0117194	0.0120491	0.340051
RA	Tryptophan levels	0.0105209	0.0175189	0.555628
RA	Glutarate (C5-DC) to caprylate (8:0) ratio	-0.012711	0.0310625	0.687496
RA	Adenosine 5'-monophosphate (AMP) to glutamate ratio	-0.00261732	0.0274981	0.925283
RA	Phosphate to cysteine ratio	0.00804078	0.0208264	0.704222
RA	Cytidine to N-acetylneuraminate ratio	-0.0189136	0.015379	0.23303
RA	Citramalate levels	0.00767238	0.0155426	0.628272
RA	Glucose to sucrose ratio	0.0248323	0.02026	0.243831
RA	2-hydroxyhippurate levels	0.011196	0.0170952	0.524875
RA	Ethyl alpha-glucopyranoside levels	0.00619597	0.0194523	0.753236
RA	2'-deoxyuridine to cytidine ratio	0.0231538	0.013667	0.106568
RA	Ascorbic acid 2-sulfate levels	0.0217055	0.0206387	0.308566
RA	Phosphate to 2'-deoxyuridine ratio	0.0344124	0.0198914	0.0964698
RA	6-oxopiperidine-2-carboxylate levels	0.00727616	0.0195898	0.714909
RA	Pregnenetriol sulfate levels	-0.0175308	0.0113635	0.134982
RA	1-palmitoyl-2-oleoyl-GPI (16:0/18:1) levels	0.00441942	0.0250464	0.862155
RA	Indoleacetate levels	-0.0208552	0.0117609	0.0906904
RA	X-25520 levels	0.0196903	0.0184363	0.326586
RA	N-succinyl-phenylalanine levels	-0.00484349	0.0138302	0.729001
RA	Glucuronide of C10H18O2 (7) levels	0.00377928	0.0189587	0.844671
RA	X-24565 levels	-0.0146518	0.0172788	0.408241
RA	(S)-a-amino-omega-caprolactam levels	0.00440175	0.0231436	0.853895
RA	X-24951 levels	-0.0243941	0.0201021	0.246524
RA	5-hydroxyindole sulfate levels	0.0110969	0.0206934	0.601583
RA	Adenosine 5'-monophosphate (AMP) to arginine ratio	-0.00817271	0.0238975	0.739436
RA	Tryptophan to pyruvate ratio	0.0360524	0.0264748	0.19829
RA	Glycolithocholate levels	0.00788502	0.0134493	0.566408
RA	X-24531 levels	-0.030033	0.0149454	0.060631
RA	Glucose to maltose ratio	-0.0371764	0.0241694	0.158391
RA	Glycerol to palmitoylcarnitine (C16) ratio	0.0195616	0.0233199	0.413919
RA	Adenosine 5'-monophosphate (AMP) to serine ratio	0.0361626	0.0242245	0.169687
RA	Dihomo-linolenoylcarnitine (C20:3n3 or 6) levels	0.0183669	0.00788228	0.0278298
RA	Dihydroferulate levels	-0.035093	0.0346242	0.385441
RA	3-amino-2-piperidone levels	-0.011472	0.0160607	0.486786
RA	Sphingomyelin (d18:1/18:1,d18:2/18:0) levels	-0.0022733	0.015458	0.884717
RA	X-22776 levels	0.0482019	0.0196539	0.0366041
RA	Glutarate (C5-DC) levels	0.0185614	0.0196726	0.365681
RA	X-25343 levels	0.0140144	0.0159113	0.39233
RA	Vanillylmandelate (VMA) levels	-0.00031946	0.0114826	0.978081
RA	X-25790 levels	0.027185	0.0230614	0.26576
RA	5alpha-androstan-3beta,17beta-diol monosulfate (2) levels	-1.71123e-05	0.0085818	0.998425
RA	Adenosine 5'-monophosphate (AMP) to phenylalanine ratio	-0.00730537	0.0138346	0.604711
RA	X-24344 levels	0.0323221	0.0422055	0.478353
RA	Methyl-4-hydroxybenzoate sulfate levels	-0.00637566	0.0153809	0.683679
RA	X-15503 levels	0.0386704	0.0169299	0.0373498
RA	Myristate (14:0) levels	0.0155602	0.020576	0.4641
RA	Dopamine 4-sulfate to dopamine 3-O-sulfate ratio	0.0150399	0.0187535	0.433026
RA	Cis-3,4-methyleneheptanoylglycine levels	0.00719591	0.010527	0.504672
RA	Fructose levels	-0.00629353	0.0183198	0.735962
RA	Mannose to glycerol ratio	-0.0245899	0.0164385	0.158564
RA	Pentose acid levels	0.0362786	0.0153324	0.0341811
RA	Isovalerylglycine levels	0.011575	0.014937	0.450427
RA	X-13728 levels	-0.0506546	0.0239825	0.0638471
RA	Adenosine 5'-diphosphate (ADP) to N-acetylneuraminate ratio	0.0194567	0.0163434	0.258909
RA	Oleoyl-linoleoyl-glycerol (18:1/18:2) [2] levels	-0.000867698	0.015207	0.955013
RA	Alliin levels	0.012408	0.011542	0.299352
RA	Cis 3,4-methyleneheptanoate levels	-0.00107281	0.0177231	0.952438
RA	Pregnenediol sulfate (C21H34O5S) levels	-0.00327023	0.0112361	0.77387
RA	Maleate levels	-0.0439981	0.0159431	0.0153501
RA	4-hydroxychlorothalonil levels	0.00621697	0.0150137	0.685562
RA	Adenosine 5'-diphosphate (ADP) to choline phosphate ratio	0.0208554	0.0235543	0.387608
RA	Gamma-glutamylmethionine levels	0.0204441	0.0215559	0.354823
RA	Adenosine 5'-diphosphate (ADP) to cytidine ratio	-0.00165604	0.019613	0.933906
RA	X-15728 levels	0.00512078	0.0133034	0.704358
RA	Gamma-glutamyltyrosine levels	0.0135415	0.0174664	0.449478
RA	Phenol sulfate levels	-0.0189987	0.0217492	0.397107
RA	Mannose to mannitol to sorbitol ratio	-0.0263752	0.0255575	0.317423
RA	Cysteinylglycine levels	0.0245875	0.0133555	0.0904667
RA	N-acetylleucine levels	0.00814609	0.00975724	0.421549
RA	O-cresol sulfate levels	-0.0310558	0.0214557	0.169794
RA	Arabonate/xylonate levels	0.024453	0.0153498	0.130709
RA	X-25957 levels	-0.00523964	0.0307541	0.868115
RA	S-methylcysteine sulfoxide levels	0.0140843	0.0141635	0.335795
RA	3-hydroxybutyroylglycine levels	0.0100386	0.0119959	0.412573
RA	Alpha-hydroxycaproate levels	-0.00554013	0.024699	0.826632
RA	X-19299 levels	0.0176047	0.025516	0.507626
RA	N-stearoyl-sphingosine (d18:1 to 18:0) to N-palmitoyl-sphinganine (d18:0 to 16:0) ratio	-0.022638	0.0147461	0.142129
RA	N-acetyl-aspartyl-glutamate (naag) levels	0.0300151	0.00894608	0.00274063
RA	X-21286 levels	-0.0385003	0.0180139	0.0451149
RA	N6-carbamoylthreonyladenosine levels	0.0066022	0.0156535	0.677108
RA	X-12731 levels	-0.0185769	0.0140225	0.199478
RA	Adenosine 5'-diphosphate (ADP) to creatine ratio	-0.0142757	0.0152643	0.369745
RA	Adenosine 5'-monophosphate (AMP) to methionine ratio	-0.0195923	0.0178995	0.295188
RA	Choline phosphate to choline ratio	-0.0119247	0.021182	0.583824
RA	Gamma-CEHC levels	0.00713797	0.00924831	0.446928
RA	X-21353 levels	0.00839299	0.012884	0.525319
RA	1-palmitoyl-2-oleoyl-gpc (16:0/18:1) levels	-0.0302658	0.0164034	0.0848595
RA	4-guanidinobutanoate levels	-0.00619163	0.0115351	0.600495
RA	Gluconate levels	-0.00414282	0.011572	0.724287
RA	Adenosine 5'-monophosphate (AMP) to aspartate ratio	-0.00125408	0.020454	0.951826
RA	Perfluorooctanesulfonate (PFOS) levels	-0.0148761	0.0219839	0.50891
RA	Choline levels	0.00802879	0.0158637	0.61892
RA	3-phosphoglycerate levels	0.0241937	0.0158951	0.146371
RA	Branched-chain,straight-chain,or cyclopropyl 10:1 fatty acid (1) levels	-0.022213	0.0182515	0.254536
RA	X-12818 levels	0.00779226	0.0141528	0.589526
RA	Palmitoylcarnitine levels (Metabolon platform)	0.00343559	0.023086	0.883449
RA	Malonylcarnitine levels	0.00249826	0.0158413	0.876793
RA	DHEAS levels	0.000676482	0.010751	0.95026
RA	Palmitoyl sphingomyelin (d18:1/16:0) levels	0.00740534	0.0163808	0.655114
RA	Phenylpyruvate levels	-0.0248538	0.014285	0.0999548
RA	Sphingomyelin (d18:1/20:0,d16:1/22:0) levels	-0.0141038	0.0114451	0.233692
RA	4-ethylcatechol sulfate levels	0.0225177	0.0181723	0.235671
RA	Homostachydrine levels	0.0045959	0.0190861	0.812291
RA	X-13431 levels	0.0154146	0.0110456	0.174657
RA	Histidine to glutamine ratio	-0.000578743	0.0114271	0.960136
RA	X-22834 levels	0.00767359	0.0211845	0.723003
RA	X-24812 levels	0.000362909	0.0136572	0.979051
RA	Phosphate to uridine ratio	-0.0347976	0.0167762	0.0545553
RA	Tyrosine to pyruvate ratio	0.0333933	0.0165682	0.0590323
RA	Glycosyl-N-palmitoyl-sphingosine (d18:1/16:0) levels	-0.00483602	0.0109121	0.662642
RA	1-palmitoyl-GPI (16:0) levels	-0.0115846	0.0153912	0.467445
RA	Eicosapentaenoate (EPA; 20:5n3) levels	-0.0296419	0.00988546	0.00661711
RA	X-21339 levels	0.00642382	0.0135988	0.642661
RA	Behenoyl dihydrosphingomyelin (d18:0/22:0) levels	-0.0190844	0.0119196	0.122438
RA	X-11632 levels	0.0166372	0.018339	0.377762
RA	Hydantoin-5-propionate levels	-0.00440823	0.0217533	0.843111
RA	(16 or 17)-methylstearate (a19:0 or i19:0) levels	-0.0180974	0.0178711	0.331205
RA	X-12798 levels	-0.00299628	0.00824604	0.719968
RA	N-acetylputrescine levels	-0.00923886	0.00776293	0.248656
RA	Alpha-ketoglutaramate levels	-0.0129469	0.0129847	0.332705
RA	Arabitol/xylitol levels	0.00501708	0.0156641	0.754255
RA	Guaiacol sulfate levels	0.0171785	0.0181247	0.355134
RA	Glycolithocholate to glycolithocholate sulfate ratio	0.000676477	0.0138789	0.961662
RA	4-hydroxyphenylacetate levels	0.0147118	0.0206583	0.489987
RA	X-24736 levels	-0.0110965	0.0138177	0.430934
RA	Glucose to glycerol ratio	-0.0308845	0.0221594	0.190913
RA	Sphingomyelin (d18:1/21:0,d17:1/22:0,d16:1/23:0) levels	-0.015672	0.0120488	0.215944
RA	2-oxoarginine levels	0.000976752	0.0230464	0.966891
RA	Phosphate to proline ratio	-0.00676084	0.0212322	0.756127
RA	Malate levels	0.00373115	0.0239496	0.87902
RA	Tetradecadienoate (14:2) levels	-0.00332582	0.0255961	0.900273
RA	X-24795 levels	-0.0190521	0.018669	0.321001
RA	X-23636 levels	0.0384628	0.0268854	0.17448
RA	S-allylcysteine levels	-0.000119938	0.0125751	0.992535
RA	Gulonate levels	-0.00362754	0.0233563	0.879665
RA	Propionylglycine levels	0.00698949	0.0158484	0.667741
RA	Adenosine 5'-diphosphate (ADP) to N-acetylglucosamine to N-acetylgalactosamine ratio	-0.007529	0.0132204	0.575688
RA	Ornithine to phosphate ratio	-0.00509022	0.0179868	0.782434
RA	Phenylacetylglutamate levels	-0.0118862	0.0203966	0.566266
RA	Caprylate (8:0) levels	-0.0166269	0.0133864	0.234614
RA	X-23587 levels	-0.0335998	0.0238729	0.18692
RA	Oleoyl ethanolamide levels	0.00577838	0.0114372	0.618922
RA	1-palmitoyl-2-oleoyl-GPE (16:0/18:1) levels	-0.00288521	0.0109456	0.794094
RA	Citrulline to ornithine ratio	-0.0111106	0.0178694	0.543432
RA	X-21821 levels	-0.0285025	0.0179758	0.136844
RA	Acetylcarnitine (C2) to propionylcarnitine (C3) ratio	-0.000294293	0.0213863	0.989267
RA	N-acetyl-beta-alanine levels	-0.0117974	0.0141841	0.41589
RA	Adenosine 5'-diphosphate (ADP) to glycerol ratio	-0.00932517	0.0171907	0.596683
RA	Gamma-glutamyltryptophan levels	-0.0277724	0.0182987	0.148593
RA	X-11470 levels	-0.0105646	0.00921599	0.261361
RA	X-23639 levels	-0.000424165	0.0197687	0.983184
RA	Valine levels	-0.0156111	0.0179451	0.398042
RA	Beta-citrylglutamate levels	0.0162625	0.00979661	0.111771
RA	X-13729 levels	0.00753504	0.0145383	0.610938
RA	Adenosine 5'-diphosphate (ADP) to flavin adenine dinucleotide (FAD) ratio	-0.00407547	0.0168971	0.812672
RA	X-23782 levels	0.0675949	0.0353443	0.0781032
RA	Adenosine 5'-monophosphate (AMP) to histidine ratio	-0.0148713	0.0153499	0.347996
RA	5alpha-androstan-3alpha,17beta-diol monosulfate (1) levels	0.00907277	0.0123067	0.474085
RA	Adipoylcarnitine (C6-DC) levels	0.000876128	0.0144121	0.952526
RA	7-methylguanine levels	-0.000164855	0.0156724	0.991746
RA	Sphingomyelin (d18:1/19:0,d19:1/18:0) levels	-0.000485826	0.012171	0.968537
RA	1-stearoyl-2-linoleoyl-gpc (18:0/18:2) levels	0.0196096	0.0111551	0.0940592
RA	Bilirubin (E,Z or Z,E) levels	0.00245481	0.009719	0.804264
RA	X-23739 levels	0.0201703	0.0216676	0.363586
RA	Linoleoyl ethanolamide levels	-0.0149033	0.0113217	0.204575
RA	4-acetylcatechol sulfate (1) levels	-0.00802684	0.0216833	0.718964
RA	X-13866 levels	-0.00310543	0.0229175	0.894142
RA	Eicosenoylcarnitine (C20:1) levels	-0.009097	0.0148337	0.545468
RA	P-cresol sulfate levels	-0.0123216	0.0192796	0.533856
RA	Citrate to oxalate (ethanedioate) ratio	0.0213154	0.0188285	0.279714
RA	X-11787 levels	-0.0164976	0.0121151	0.196415
RA	2,3-dihydroxypyridine levels	0.0590689	0.0319065	0.0853324
RA	Spermidine to pyruvate ratio	-0.0071248	0.0216197	0.748538
RA	X-25271 levels	0.0403923	0.0233919	0.114913
RA	Bilirubin (Z,Z) to glucuronate ratio	-0.0242763	0.00989098	0.0245203
RA	Carnitine to palmitoylcarnitine (C16) ratio	-0.000635791	0.0153647	0.967335
RA	X-24949 levels	-0.00164547	0.0112776	0.886076
RA	2-palmitoleoyl-GPC (16:1) levels	-0.00345606	0.0163991	0.835746
RA	Sphingosine levels	0.00273211	0.0191625	0.888991
RA	Sphingomyelin (d18:2/14:0,d18:1/14:1) levels	0.00202817	0.0192889	0.917751
RA	7-methylxanthine levels	-0.00331756	0.0178375	0.854792
RA	Beta-alanine levels	0.000642908	0.016171	0.968999
RA	Piperine levels	-0.0185165	0.0131247	0.176336
RA	Gamma-glutamyl-2-aminobutyrate levels	0.00660875	0.0142122	0.648193
RA	Phenyllactate (PLA) levels in elite athletes	-0.00959722	0.00934259	0.316565
RA	X-11478 levels	-0.00551012	0.0204924	0.791454
RA	Heptenedioate (C7:1-DC) levels	0.0164471	0.0241749	0.511734
RA	N-acetylphenylalanine levels	-0.00256171	0.00770458	0.742978
RA	Flavin adenine dinucleotide (FAD) levels	0.014674	0.0183641	0.438614
RA	2'-deoxyuridine levels	-0.0371113	0.0171013	0.0428853
RA	Glutamate to pyruvate ratio	0.00607009	0.0135301	0.658518
RA	S-carboxyethylcysteine levels	0.0112121	0.0172124	0.525337
RA	2-aminoheptanoate levels	0.000594515	0.0151407	0.969088
RA	Carotene diol (1) levels	-0.00354979	0.0128025	0.783683
RA	Arachidate (20:0) levels	-0.0389305	0.0192462	0.0659629
RA	Cysteine to 5-oxoproline ratio	-0.01383	0.0139172	0.341707
RA	Carotene diol (2) levels	0.0143017	0.0159353	0.388681
RA	X-21829 levels	0.000401708	0.0170475	0.981446
RA	N-acetylglycine levels	0.00654717	0.0101247	0.525207
RA	N-palmitoyl-sphingosine (d18:1 to 16:0) to N-palmitoyl-sphinganine (d18:0 to 16:0) ratio	-0.0142877	0.0139009	0.320321
RA	2-linoleoylglycerol (18:2) levels	-0.0269463	0.0172581	0.136858
RA	Alpha-ketoglutarate to glutamate ratio	0.0124156	0.0148115	0.410523
RA	Cholate to adenosine 3',5'-cyclic monophosphate (cAMP) ratio	-0.00175301	0.0256734	0.946527
RA	X-24544 levels	0.00868814	0.00980951	0.383331
RA	Adenosine 5'-monophosphate (AMP) to N-palmitoyl-sphingosine (d18:1 to 16:0) ratio	0.00319143	0.0196849	0.873523
RA	Aspartate levels	0.0174729	0.0174172	0.328373
RA	Citrate to 4-hydroxyphenylpyruvate ratio	0.010368	0.0200386	0.612422
RA	2-stearoyl-GPE (18:0) levels	0.00925732	0.0165263	0.581594
RA	Gentisate levels	-0.0176863	0.0197114	0.381423
RA	Tyrosine levels	0.00525036	0.0144767	0.72085
RA	X-21441 levels	0.000639871	0.00844627	0.940192
RA	X-25422 levels	-0.0139456	0.0138934	0.330435
RA	Nervonoylcarnitine (C24:1) levels	0.00663266	0.0124825	0.60133
RA	X-18935 levels	-0.00996208	0.0225235	0.664584
RA	Glutamate to alanine ratio	0.0146056	0.0145402	0.331068
RA	Glucuronate to etiocholanolone glucuronide ratio	0.00616545	0.0220486	0.78385
RA	Spermidine to phosphate ratio	-0.0184945	0.0193213	0.361031
RA	13-HODE + 9-HODE levels	-0.0313281	0.0143548	0.0540246
RA	1-palmitoyl-2-arachidonoyl-gpc (16:0/20:4n6) levels	-0.00255222	0.00683908	0.713144
RA	1-methylnicotinamide levels	0.00663063	0.0185351	0.725218
RA	X-21442 levels	-0.02806	0.0219668	0.225627
RA	Retinol (Vitamin A) to linoleoyl-arachidonoyl-glycerol (18:2 to 20:4) [1] ratio	0.00305928	0.011634	0.795937
RA	2-hydroxydecanoate levels	-0.00189109	0.0171672	0.914106
RA	Stearoyl sphingomyelin (d18:1/18:0) levels	-0.000350315	0.0138319	0.980004
RA	X-11372 levels	0.00657225	0.0146155	0.657343
RA	1-linoleoyl-GPG (18:2) levels	-0.0123707	0.00935531	0.215506
RA	X-23680 levels	0.000288523	0.0117799	0.980782
RA	N-acetyl-1-methylhistidine levels	-0.00618175	0.00696318	0.3828
RA	Cholate to bilirubin (Z,Z) ratio	-0.0237804	0.0165517	0.171324
RA	Indolin-2-one levels	0.0058417	0.0243822	0.816673
RA	1-(1-enyl-palmitoyl)-GPC (p-16:0) levels	-0.0208629	0.0134612	0.135445
RA	2-hydroxyphenylacetate levels	0.0283918	0.0174985	0.123088
RA	Benzoate to linoleoyl-arachidonoyl-glycerol (18:2 to 20:4) [2] ratio	0.00986608	0.00958732	0.320896
RA	N-alpha-acetylornithine levels	-0.00339906	0.02023	0.869366
RA	Phosphate to oleoyl-linoleoyl-glycerol (18:1 to 18:2) [2] ratio	-0.0108674	0.0137395	0.437808
RA	X-23659 levels	-0.00949754	0.0144678	0.519401
RA	Glycosyl-N-stearoyl-sphingosine (d18:1/18:0) levels	-0.0265635	0.0108585	0.021808
RA	X-23997 levels	0.000138099	0.0159306	0.993174
RA	Adenosine 5'-diphosphate (ADP) to glycine ratio	0.00395458	0.0162619	0.810776
RA	Cholic acid glucuronide levels	0.0225693	0.0308376	0.482865
RA	Aspartate to asparagine ratio	0.0121422	0.0263257	0.652256
RA	X-21752 levels	0.0132637	0.0158285	0.415205
RA	X-13007 levels	0.00435977	0.0141131	0.760931
RA	Myristoyl dihydrosphingomyelin (d18:0/14:0) levels	-0.0111083	0.0104658	0.298659
RA	Adenosine 5'-monophosphate (AMP) to glutamine ratio	-0.0296316	0.0214343	0.200176
RA	Gamma-CEHC glucuronide levels	0.00528794	0.0142542	0.713912
RA	5-acetylamino-6-formylamino-3-methyluracil levels	-0.011541	0.00721698	0.133798
RA	Androsterone glucuronide levels	-0.00672777	0.0121213	0.585703
RA	2s,3R-dihydroxybutyrate levels	-0.00822027	0.0189113	0.669604
RA	Adenosine 5'-diphosphate (ADP) to ornithine ratio	-0.0211478	0.0166028	0.219891
RA	Histidine to asparagine ratio	-0.0101545	0.0139928	0.477357
RA	1-palmitoyl-2-arachidonoyl-GPE (16:0/20:4) levels	0.0255779	0.0103001	0.0287856
RA	Adenosine 3',5'-cyclic monophosphate (cAMP) to taurocholate ratio	0.0166339	0.0189752	0.403488
RA	2-methylserine levels	0.00872652	0.0153566	0.577748
RA	Alpha-hydroxyisovalerate levels	-0.00956792	0.0109027	0.398939
RA	O-sulfo-l-tyrosine levels	0.0345157	0.0127853	0.0157836
RA	Sphinganine levels	0.00547294	0.0174872	0.758112
RA	1-palmitoyl-2-palmitoleoyl-gpc (16:0/16:1) levels	0.000435064	0.0153356	0.977768
RA	5-hydroxymethyl-2-furoylcarnitine levels	0.0329389	0.0155424	0.0500588
RA	Biliverdin levels	-0.00166491	0.0080938	0.839332
RA	Docosahexaenoylcholine levels	0.0146258	0.0116795	0.238969
RA	Adenosine 5'-diphosphate (ADP) to arginine ratio	0.0370524	0.0348747	0.308948
RA	X-12127 levels	0.00330305	0.0238773	0.891084
RA	S-methylcysteine levels	-0.00228592	0.0113538	0.843553
RA	4-methylhexanoylglutamine levels	0.00463638	0.0146087	0.756416
RA	X-11852 levels	-0.0113405	0.0187903	0.554618
RA	Cis-4-decenoylcarnitine (C10:1) levels	-0.00410974	0.0110136	0.713649
RA	9,10-DiHOME levels	-0.00101665	0.0146266	0.945644
RA	Mannose levels	-0.009338	0.00945333	0.338918
RA	Cholesterol to cortisol ratio	-0.0384776	0.0288188	0.223609
RA	4-oxo-retinoic acid levels	0.00244537	0.016237	0.883282
RA	1-(1-enyl-stearoyl)-2-arachidonoyl-GPE (p-18:0/20:4) levels	-0.0152772	0.0143265	0.303122
RA	Decadienedioic acid (C10:2-DC) levels	0.00246987	0.0116991	0.834579
RA	N-acetylneuraminate to N-acetylglucosamine to N-acetylgalactosamine ratio	-0.00434837	0.0102505	0.678347
RA	4-methyl-2-oxopentanoate levels	0.0353757	0.037796	0.37668
RA	X-12221 levels	-0.0413773	0.021647	0.0711492
RA	Glycine levels	0.0112041	0.00716813	0.136465
RA	X-22771 levels	0.015101	0.0135482	0.283785
RA	Citrulline to phosphate ratio	0.0059764	0.0143363	0.680478
RA	Paraxanthine levels in elite athletes	0.00258862	0.0112991	0.820816
RA	3-formylindole levels	-0.000877041	0.00767199	0.909774
RA	Carnitine C4 levels	-0.00258661	0.00725912	0.723469
RA	4-acetaminophen sulfate levels	0.0147638	0.0197527	0.465649
RA	3-hydroxydecanoylcarnitine levels	0.00878804	0.0225754	0.702205
RA	X-22162 levels	-0.0108317	0.00924889	0.256814
RA	N-acetyl-L-glutamine levels	0.00690102	0.0147014	0.647943
RA	Adenosine 5'-diphosphate (ADP) levels	0.0279507	0.015528	0.085586
RA	Trimethylamine n-oxide levels	0.00754724	0.0177441	0.678792
RA	X-17325 levels	0.00826511	0.0155321	0.602429
RA	Lanthionine levels	-0.0156602	0.0192959	0.427084
RA	Adenosine 5'-diphosphate (ADP) to mannose ratio	0.00664479	0.0136013	0.631795
RA	Cholesterol to linoleoyl-arachidonoyl-glycerol (18:2 to 20:4) [2] ratio	0.0206592	0.0107866	0.0674482
RA	Sphinganine-1-phosphate levels	0.0330816	0.0185878	0.09538
RA	X-11299 levels	0.0296041	0.0224314	0.213721
RA	X-10458 levels	-0.000445642	0.0138606	0.974686
RA	3-indoleglyoxylic acid levels	0.0112904	0.0109383	0.318337
RA	X-17010 levels	0.012136	0.0235071	0.618108
RA	Caffeic acid sulfate levels	0.00639433	0.0200919	0.75499
RA	5alpha-androstan-3alpha,17alpha-diol monosulfate levels	0.0173034	0.0114151	0.143799
RA	Erucate (22:1n9) levels	-0.0210173	0.0205638	0.328707
RA	Salicylate to oxalate (ethanedioate) ratio	-0.00973984	0.0163156	0.5638
RA	Cysteine s-sulfate levels	-0.00834035	0.0164411	0.62415
RA	5,6-dihydrothymine levels	-0.0105886	0.0195887	0.601939
RA	Taurocholenate sulfate levels	0.00412291	0.00872694	0.640036
RA	Phenylalanine to tyrosine ratio	0.00406797	0.0151537	0.79227
RA	Ascorbic acid 3-sulfate levels	-0.0291242	0.01571	0.0865823
RA	Taurocholic acid levels	-0.0186961	0.0240285	0.449472
RA	Alpha-tocopherol to sulfate ratio	-0.00177049	0.0141471	0.902321
RA	1-arachidonoyl-GPE (20:4n6) levels	-0.0211703	0.00879255	0.0244692
RA	2-aminooctanoate levels	0.0324901	0.0204784	0.133466
RA	Phosphate to acetoacetate ratio	-0.0144408	0.0162984	0.393012
RA	Sphingomyelin (d18:1/25:0,d19:0/24:1,d20:1/23:0,d19:1/24:0) levels	0.00714805	0.0076182	0.356733
RA	Tricosanoyl sphingomyelin (d18:1/23:0) levels	0.00225563	0.020495	0.91346
RA	6-bromotryptophan levels	0.0123876	0.0119401	0.31595
RA	8-methoxykynurenate levels	0.00755879	0.0194342	0.702784
RA	Oleoyl-linoleoyl-glycerol (18:1 to 18:2) [2] to linoleoyl-arachidonoyl-glycerol (18:2 to 20:4) [1] ratio	-0.00277609	0.0109359	0.803302
RA	X-16087 levels	-0.00378123	0.0117645	0.752335
RA	X-24978 levels	0.0114756	0.0217801	0.606522
RA	Delta-CEHC levels	0.0186455	0.0283624	0.524439
RA	N-acetyltyrosine levels	-0.00549482	0.00687662	0.432093
RA	Sebacate (C10-DC) levels	0.00256571	0.0214261	0.907055
RA	X-25828 levels	-0.0378435	0.0229976	0.130882
RA	3-phosphoglycerate to adenosine 5'-diphosphate (ADP) ratio	-0.0312227	0.0190201	0.122945
RA	3-methylhistidine levels	-0.0184865	0.0170932	0.293747
RA	Alpha-ketoglutarate to proline ratio	-0.0181686	0.0163687	0.28342
RA	1-palmitoyl-GPG (16:0) levels	0.000955482	0.0120741	0.937753
RA	1,2,3-benzenetriol sulfate (2) levels	0.00767117	0.0277056	0.786225
RA	Branched chain 14:0 dicarboxylic acid levels	-0.0139429	0.0181384	0.454847
RA	Mannose to S-methylcysteine ratio	-0.00848327	0.0191311	0.663785
RA	Lithocholate sulfate (1) levels	-0.00678511	0.0160036	0.678516
RA	X-24556 levels	-0.00300917	0.0125783	0.813357
RA	5-oxoproline levels	0.0171873	0.0117089	0.165913
RA	Adenosine 5'-diphosphate (ADP) to valine ratio	0.0208742	0.0160848	0.209905
RA	Adenosine 3',5'-cyclic monophosphate (cAMP) to adenosine 5'-monophosphate (AMP) ratio	0.00854029	0.0235637	0.72457
RA	Glycochenodeoxycholate glucuronide (1) levels	0.014549	0.00743318	0.0631177
RA	Spermidine levels	-0.00709916	0.0124362	0.577152
RA	Methylsuccinate levels	-0.0135498	0.02083	0.526704
RA	11beta-hydroxyandrosterone glucuronide levels	0.00596173	0.00883921	0.506739
RA	X-25419 levels	-0.0110329	0.0197643	0.585508
RA	3-hydroxyphenylacetoylglutamine levels	-0.00489981	0.0206537	0.817785
RA	X-25519 levels	0.0585041	0.0202721	0.0148132
RA	X-25810 levels	-0.0360173	0.0134799	0.0146494
RA	N2,n2-dimethylguanosine levels	-0.0330777	0.0199494	0.1582
RA	N-formylphenylalanine levels	-0.00974803	0.0167461	0.566693
RA	Carnitine C14:1 levels	0.0089302	0.0142796	0.538457
RA	Phosphate to tryptophan ratio	-0.0155741	0.0232891	0.516327
RA	Docosadioate (C22-DC) levels	-0.00174713	0.0140202	0.902483
RA	Glucuronide of piperine metabolite C17H21NO3 (4) levels	-0.0212783	0.0163537	0.214222
RA	Retinol (Vitamin A) to linoleoyl-arachidonoyl-glycerol (18:2 to 20:4) [2] ratio	0.00799875	0.0104973	0.454546
RA	1-stearoyl-2-oleoyl-gpc (18:0/18:1) levels	-0.0093948	0.0167172	0.579132
RA	Trans-2-hexenoylglycine levels	0.0347207	0.016003	0.0429241
RA	1-palmitoleoyl-GPC (16:1) levels	0.0191836	0.0135448	0.167715
RA	1,2-dilinoleoyl-GPC (18:2/18:2) levels	0.00990161	0.0077239	0.226222
RA	Adenosine 5'-monophosphate (AMP) to palmitate (16:0) ratio	-0.0205936	0.0199568	0.320931
RA	X-12738 levels	-0.0494768	0.0291755	0.124154
RA	X-12847 levels	0.0462299	0.0209669	0.0549004
RA	Aspartate to N-acetylglucosamine to N-acetylgalactosamine ratio	-0.00592363	0.0138836	0.674978
RA	1-arachidonylglycerol (20:4) levels	-0.0245285	0.0155751	0.136142
RA	X-11850 levels	-0.0193826	0.0157019	0.233842
RA	Phosphoethanolamine levels	0.0178336	0.0243382	0.476721
RA	5-hydroxylysine levels	0.00474994	0.00886538	0.598665
RA	Gamma-glutamylglutamate levels	-0.0248294	0.0169505	0.159322
RA	Dimethylarginine (sdma + adma) levels	0.00563816	0.0102618	0.590797
RA	Sulfate of piperine metabolite C18H21NO3 (3) levels	-0.0050337	0.0188987	0.793172
RA	Dihomo-linolenoyl-choline levels	0.0126239	0.0179068	0.490371
RA	Gamma-glutamylglutamine levels	0.00325917	0.0142127	0.820844
RA	Ethylmalonate levels	0.00988511	0.00955751	0.307544
RA	Methionine to methionine sulfoxide ratio	0.00652456	0.0167251	0.701035
RA	N,n,n-trimethyl-alanylproline betaine (tmap) levels	-0.0266363	0.0161545	0.1148
RA	Deoxycholate levels	-0.00632144	0.0202942	0.762522
RA	N-acetylcarnosine levels	0.0150361	0.010964	0.186228
RA	Spermidine to (N(1) + N(8))-acetylspermidine ratio	0.016179	0.0134913	0.247902
RA	X-12100 levels	0.00564384	0.0199045	0.779993
RA	N6-methyllysine levels	-0.00266722	0.00711216	0.710573
RA	X-12117 levels	-0.00483739	0.00660284	0.469877
RA	1-ribosyl-imidazoleacetate levels	-0.00516662	0.0169246	0.762417
RA	Hypotaurine levels	-0.0123968	0.0243367	0.616347
RA	Cystathionine levels	-0.0144859	0.0128642	0.270832
RA	X-12261 levels	0.00800012	0.0196789	0.691507
RA	N1-methylinosine levels	0.000992751	0.0190589	0.959032
RA	Metabolonic lactone sulfate levels	0.00660677	0.00572989	0.257709
RA	X-21470 levels	-0.00425058	0.0169925	0.806385
RA	N1-methyladenosine levels	0.0209965	0.0149476	0.172423
RA	X-11483 levels	-0.00799401	0.0187928	0.676229
RA	Adenosine 5'-monophosphate (AMP) to glycine ratio	-0.00704639	0.0129081	0.594388
RA	Sphingomyelin (d18:0/18:0,d19:0/17:0) levels	-0.0231479	0.0130988	0.0917286
RA	Hydroxy-N6,N6,N6-trimethyllysine levels	-0.00483562	0.0150479	0.75128
RA	Glycohyocholate levels	-0.011514	0.0160649	0.487265
RA	3-hydroxyoctanoylcarnitine (2) levels	0.0110877	0.0277413	0.701306
RA	Activated & resting Treg % CD4 Treg	0.0281782	0.0214058	0.224508
RA	Activated & resting Treg %CD4+	0.0105093	0.0126949	0.422702
RA	Activated & resting Treg AC	-0.00812828	0.0254145	0.759942
RA	Activated & secreting Treg %CD4 Treg	-0.0103328	0.0195778	0.608133
RA	Activated & secreting Treg %CD4+	0.0165039	0.0273876	0.56346
RA	Activated & secreting Treg AC	0.0144347	0.0356659	0.712811
RA	Activated Treg %CD4	-0.0139587	0.0489733	0.802428
RA	Activated Treg %CD4 Treg	-0.1556	0.0484604	0.01484
RA	Activated Treg AC	NA	NA	NA
RA	B cell % CD3- lymphocyte	0.0151276	0.0129382	0.26943
RA	B cell %lymphocyte	0.0147402	0.0138254	0.300438
RA	B cell AC	0.0154936	0.017984	0.405839
RA	BAFF-R on B cell	-0.000227102	0.0097659	0.982017
RA	BAFF-R on CD20-	-0.0283318	0.0247149	0.3348
RA	BAFF-R on CD20- CD38-	NA	NA	NA
RA	BAFF-R on CD24+ CD27+	-0.0111062	0.029842	0.719435
RA	BAFF-R on IgD- CD24-	-0.0172777	0.017786	0.35425
RA	BAFF-R on IgD- CD27-	0.0112933	0.0128827	0.403482
RA	BAFF-R on IgD- CD38-	-0.0417153	0.0682463	0.574068
RA	BAFF-R on IgD- CD38br	-0.0169045	0.021117	0.44653
RA	BAFF-R on IgD- CD38dim	0.00212826	0.0245003	0.933604
RA	BAFF-R on IgD+	-0.000124121	0.0097497	0.990154
RA	BAFF-R on IgD+ CD24-	-7.21818e-05	0.00974547	0.994272
RA	BAFF-R on IgD+ CD24+	-0.00191166	0.0281357	0.948463
RA	BAFF-R on IgD+ CD38-	-0.00334288	0.014909	0.828991
RA	BAFF-R on IgD+ CD38- naive	-0.0150797	0.0209076	0.491291
RA	BAFF-R on IgD+ CD38- unsw mem	0.000555422	0.0167832	0.974322
RA	BAFF-R on IgD+ CD38br	-0.0188182	0.0141627	0.216644
RA	BAFF-R on IgD+ CD38dim	-0.00256154	0.00962566	0.796146
RA	BAFF-R on memory B cell	-0.0104968	0.0483892	0.836841
RA	BAFF-R on naive-mature B cell	-3.49652e-05	0.00973379	0.997222
RA	BAFF-R on sw mem	0.00732913	0.0152957	0.64643
RA	BAFF-R on transitional	-0.0166853	0.0156318	0.316943
RA	BAFF-R on unsw mem	-0.030835	0.0397872	0.47338
RA	Basophil %CD33dim HLA DR- CD66b-	0.0167455	0.01381	0.264628
RA	Basophil AC	0.0152726	0.0174745	0.400799
RA	CCR2 on CD14- CD16-	-0.00144525	0.0305327	0.965221
RA	CCR2 on CD14- CD16+ monocyte	0.0274472	0.0230323	0.27838
RA	CCR2 on CD14+ CD16- monocyte	0.0474041	0.0212043	0.0667505
RA	CCR2 on CD14+ CD16+ monocyte	0.0157662	0.0208944	0.469792
RA	CCR2 on CD62L+ myeloid DC	0.148289	0.0508526	0.0267686
RA	CCR2 on CD62L+ plasmacytoid DC	-0.0103251	0.0124098	0.429539
RA	CCR2 on granulocyte	-0.125858	0.081451	0.262319
RA	CCR2 on monocyte	0.0255946	0.027051	0.375575
RA	CCR2 on monocyte_duplicate	-0.019693	0.0249099	0.455141
RA	CCR2 on myeloid DC	0.0582397	0.0345546	0.142882
RA	CCR2 on plasmacytoid DC	-0.010276	0.0124149	0.431827
RA	CCR7 on naive CD4+	0.00819692	0.016669	0.636107
RA	CCR7 on naive CD8br	0.0158001	0.0272216	0.582755
RA	CD11b on basophil	-0.0362566	0.0263003	0.205349
RA	CD11b on CD14+ monocyte	0.0280568	0.0283809	0.3558
RA	CD11b on CD33br HLA DR+ CD14dim	0.00735343	0.0343594	0.850372
RA	CD11b on CD33dim HLA DR-	-0.0183746	0.0230855	0.446554
RA	CD11b on CD66b++ myeloid cell	-0.00751839	0.0212291	0.741103
RA	CD11b on Gr MDSC	0.00966932	0.0558509	0.878488
RA	CD11b on Mo MDSC	-0.00703207	0.0218095	0.76829
RA	CD11c on CD62L+ myeloid DC	-0.00492432	0.0192472	0.803256
RA	CD11c on granulocyte	0.00233053	0.021381	0.915594
RA	CD11c on monocyte	-0.0159872	0.019327	0.435415
RA	CD11c on myeloid DC	-0.0235612	0.0330602	0.487757
RA	CD11c+ CD62L- monocyte %monocyte	0.00481585	0.0432949	0.915758
RA	CD11c+ CD62L- monocyte AC	-0.0820204	0.0542467	0.227726
RA	CD11c+ HLA DR++ monocyte %monocyte	0.00631804	0.0231323	0.795678
RA	CD11c+ HLA DR++ monocyte AC	0.0118213	0.0329465	0.73203
RA	CD11c+ monocyte %monocyte	-0.0213255	0.0257122	0.467713
RA	CD11c+ monocyte AC	0.0714929	0.0926875	0.521175
RA	CD123 on CD62L+ plasmacytoid DC	0.0766195	0.0543578	0.294064
RA	CD123 on plasmacytoid DC	0.0756407	0.0529512	0.289349
RA	CD127- CD8br %CD8br	-0.040082	0.0925524	0.694209
RA	CD127- CD8br %T cell	0.00493311	0.0666926	0.947768
RA	CD127- CD8br AC	NA	NA	NA
RA	CD127 on CD28- CD8br	0.0372938	0.0622536	0.575239
RA	CD127 on CD28+ CD4+	0.0138402	0.0262425	0.620474
RA	CD127 on CD28+ CD45RA- CD8br	-0.0443408	0.142502	0.785117
RA	CD127 on CD28+ CD45RA+ CD8br	NA	NA	NA
RA	CD127 on CD28+ DN (CD4-CD8-)	-0.0192958	0.0341061	0.596003
RA	CD127 on CD4+	-0.00918474	0.0494802	0.860035
RA	CD127 on CD45RA- CD4 not Treg	0.029484	0.0532019	0.635142
RA	CD127 on CD45RA+ CD4+	-0.0330617	0.0512847	0.565045
RA	CD127 on CD8br	-0.0016739	0.0222327	0.941336
RA	CD127 on granulocyte	0.016925	0.0156148	0.301594
RA	CD127 on T cell	-0.00744425	0.0249709	0.775668
RA	CD14- CD16- AC	-0.019831	0.0298519	0.521514
RA	CD14- CD16+ monocyte %monocyte	0.0190259	0.0345337	0.601573
RA	CD14- CD16+ monocyte AC	-0.0170052	0.0233007	0.4892
RA	CD14 on CD33dim HLA DR+ CD11b+	0.0566701	0.0814074	0.612857
RA	CD14 on CD14+ CD16- monocyte	0.0317824	0.0264723	0.275154
RA	CD14 on CD14+ CD16+ monocyte	-0.0703946	0.0284453	0.0425368
RA	CD14 on CD33br HLA DR+ CD14dim	-0.0621207	0.0278927	0.0612299
RA	CD14 on Mo MDSC	-0.012208	0.0286557	0.68495
RA	CD14+ CD16- monocyte %monocyte	-0.0347494	0.018897	0.125326
RA	CD14+ CD16- monocyte AC	-0.0594395	0.05664	0.321344
RA	CD14+ CD16+ monocyte %monocyte	0.0013842	0.0202265	0.948092
RA	CD14+ CD16+ monocyte AC	-0.0146096	0.0160411	0.413942
RA	CD16-CD56 on HLA DR+ NK	0.0257595	0.0230351	0.29241
RA	CD16-CD56 on NK	-0.0261883	0.0226324	0.26974
RA	CD16-CD56 on NKT	0.0136375	0.0179542	0.465041
RA	CD16 on CD14- CD16+ monocyte	0.0342795	0.0148203	0.0600205
RA	CD16 on CD14+ CD16+ monocyte	0.0125698	0.01507	0.431769
RA	CD16+ monocyte %monocyte	0.0315752	0.0252169	0.257115
RA	CD19 on B cell	0.031021	0.0290099	0.316124
RA	CD19 on CD20-	0.0326065	0.0462687	0.531768
RA	CD19 on CD20- CD38-	0.0310169	0.0266557	0.274501
RA	CD19 on CD24+ CD27+	-0.0445068	0.0247019	0.0917143
RA	CD19 on IgD- CD24-	0.00804584	0.0268798	0.776733
RA	CD19 on IgD- CD27-	-0.0413938	0.0288192	0.200931
RA	CD19 on IgD- CD38-	-0.0311806	0.041288	0.478716
RA	CD19 on IgD- CD38br	-0.0102703	0.0223512	0.662057
RA	CD19 on IgD- CD38dim	-0.039204	0.0255485	0.168781
RA	CD19 on IgD+	-0.0561383	0.0286238	0.0906528
RA	CD19 on IgD+ CD24-	-0.0480947	0.0280978	0.117736
RA	CD19 on IgD+ CD24+	-0.0354003	0.0243186	0.169201
RA	CD19 on IgD+ CD38-	-0.0475146	0.0258553	0.0959571
RA	CD19 on IgD+ CD38- naive	0.0106086	0.025112	0.694414
RA	CD19 on IgD+ CD38- unsw mem	-0.0620721	0.0250874	0.0481802
RA	CD19 on IgD+ CD38br	-0.0475106	0.0232193	0.0749529
RA	CD19 on IgD+ CD38dim	-0.0582387	0.0188935	0.0130877
RA	CD19 on memory B cell	-0.0944303	0.0479047	0.0841859
RA	CD19 on naive-mature B cell	0.00525745	0.0266322	0.847462
RA	CD19 on PB/PC	-0.0073048	0.0292861	0.81019
RA	CD19 on sw mem	-0.0279506	0.0323081	0.407244
RA	CD19 on transitional	-0.0528699	0.0197938	0.0203717
RA	CD19 on unsw mem	-0.0724015	0.0372821	0.0932614
RA	CD20- %B cell	0.00865103	0.0868877	0.92977
RA	CD20- %lymphocyte	-0.0160486	0.0256192	0.595001
RA	CD20- AC	-0.00706485	0.0454935	0.88645
RA	CD20- CD38- %B cell	0.040815	0.0231575	0.128451
RA	CD20- CD38- %lymphocyte	0.0342494	0.0360878	0.379234
RA	CD20- CD38- AC	0.0266645	0.0570431	0.659845
RA	CD20 on B cell	0.0414731	0.0248517	0.126112
RA	CD20 on CD20- CD38-	-0.103809	0.12214	0.551534
RA	CD20 on CD24+ CD27+	-0.000776775	0.0230814	0.973888
RA	CD20 on IgD- CD24-	0.0385045	0.0352342	0.316399
RA	CD20 on IgD- CD27-	0.0461691	0.0237621	0.083908
RA	CD20 on IgD- CD38-	0.0116161	0.0327639	0.729087
RA	CD20 on IgD- CD38br	-0.0704732	0.0483089	0.282005
RA	CD20 on IgD- CD38dim	-0.000433781	0.027287	0.987541
RA	CD20 on IgD+	0.0358334	0.0293971	0.246286
RA	CD20 on IgD+ CD24-	0.039604	0.0232273	0.111947
RA	CD20 on IgD+ CD24+	-0.0225026	0.0338148	0.530488
RA	CD20 on IgD+ CD38-	0.010109	0.0197482	0.621046
RA	CD20 on IgD+ CD38- naive	-0.0749358	0.0905959	0.445822
RA	CD20 on IgD+ CD38- unsw mem	0.0221192	0.027755	0.445998
RA	CD20 on IgD+ CD38br	0.040462	0.0216294	0.0882108
RA	CD20 on IgD+ CD38dim	0.0679743	0.0331754	0.0612143
RA	CD20 on memory B cell	0.00424267	0.0140279	0.766209
RA	CD20 on naive-mature B cell	0.049533	0.0309325	0.143769
RA	CD20 on sw mem	-0.0138767	0.0350741	0.699315
RA	CD20 on transitional	0.0622273	0.0388379	0.160224
RA	CD20 on unsw mem	-0.00221315	0.0221178	0.922096
RA	CD24 on CD24+ CD27+	-0.00602874	0.0127264	0.652445
RA	CD24 on IgD- CD38-	-0.00219412	0.013194	0.872049
RA	CD24 on IgD- CD38dim	-0.0295276	0.0137709	0.0606057
RA	CD24 on IgD+ CD24+	-0.00743308	0.0130027	0.598145
RA	CD24 on IgD+ CD38-	-0.00864532	0.0337642	0.810541
RA	CD24 on IgD+ CD38- unsw mem	-0.0111337	0.0163317	0.525705
RA	CD24 on IgD+ CD38br	0.0168412	0.0169402	0.346122
RA	CD24 on memory B cell	-0.0163654	0.0173377	0.388553
RA	CD24 on sw mem	-0.015601	0.0173636	0.395161
RA	CD24 on transitional	-0.00257612	0.0247377	0.922073
RA	CD24 on unsw mem	0.0167086	0.0186113	0.410451
RA	CD24+ CD27+ %B cell	-0.033879	0.0176927	0.0918413
RA	CD24+ CD27+ %lymphocyte	-0.0146384	0.0144771	0.335787
RA	CD24+ CD27+ AC	-0.00178289	0.0219169	0.937443
RA	CD25 on CD45RA- CD4 not Treg	0.0199427	0.0147352	0.218001
RA	CD25 on activated & secreting Treg	-0.0495761	0.0356892	0.237135
RA	CD25 on activated Treg	0.0884579	0.0944232	0.417959
RA	CD25 on B cell	-0.0181953	0.0215786	0.431434
RA	CD25 on CD20- CD38-	0.0137629	0.0269858	0.631755
RA	CD25 on CD24+ CD27+	-0.0357942	0.0164044	0.0516859
RA	CD25 on CD28+ CD4+	0.0280766	0.0232557	0.440387
RA	CD25 on CD39+ activated Treg	-0.011429	0.0498513	0.82991
RA	CD25 on CD39+ CD4 Treg	0.000666984	0.0252036	0.979911
RA	CD25 on CD39+ CD4+	-0.0113454	0.021497	0.613972
RA	CD25 on CD39+ resting Treg	0.0144017	0.0218265	0.545422
RA	CD25 on CD39+ secreting Treg	0.00150885	0.0485515	0.97803
RA	CD25 on CD4 Treg	0.0234512	0.0230138	0.338024
RA	CD25 on CD4+	-0.019098	0.0294094	0.551495
RA	CD25 on CD45RA+ CD4 not Treg	0.0816497	0.0591993	0.399373
RA	CD25 on IgD- CD24-	0.00360127	0.0199005	0.859416
RA	CD25 on IgD- CD27-	-0.0213255	0.037954	0.59455
RA	CD25 on IgD- CD38-	0.0153674	0.0180078	0.426199
RA	CD25 on IgD- CD38br	-0.028404	0.0616681	0.669017
RA	CD25 on IgD- CD38dim	-0.0253046	0.0292421	0.412044
RA	CD25 on IgD+	-0.0515041	0.0213504	0.0524075
RA	CD25 on IgD+ CD24-	-0.0420675	0.0217063	0.110348
RA	CD25 on IgD+ CD24+	-0.0475456	0.0243694	0.0989164
RA	CD25 on IgD+ CD38-	-0.0121044	0.0311048	0.710602
RA	CD25 on IgD+ CD38- naive	-0.0348428	0.0225289	0.16055
RA	CD25 on IgD+ CD38- unsw mem	-0.0100934	0.0271652	0.725449
RA	CD25 on IgD+ CD38br	-0.0243852	0.0367416	0.528131
RA	CD25 on IgD+ CD38dim	-0.0121743	0.0212227	0.581971
RA	CD25 on memory B cell	-0.0225607	0.0236168	0.367406
RA	CD25 on naive-mature B cell	-0.0274958	0.0148221	0.100693
RA	CD25 on resting Treg	-0.00598427	0.0268424	0.834503
RA	CD25 on secreting Treg	0.0163397	0.0441549	0.735924
RA	CD25 on sw mem	-0.0304343	0.0174797	0.115648
RA	CD25 on transitional	-0.00970248	0.0270781	0.729379
RA	CD25 on unsw mem	-0.0585354	0.0194259	0.0236012
RA	CD25++ CD8br %CD8br	0.00635753	0.0196788	0.757609
RA	CD25++ CD8br %T cell	0.0300925	0.01756	0.147254
RA	CD25++ CD8br AC	0.0248856	0.0186175	0.218093
RA	CD25hi %CD4+	0.00260334	0.021714	0.910349
RA	CD25hi %T cell	0.0399225	0.0191779	0.10582
RA	CD25hi AC	-0.0510606	0.0285995	0.172187
RA	CD25hi CD45RA- CD4 not Treg %CD4+	0.00109631	0.021607	0.961181
RA	CD25hi CD45RA- CD4 not Treg %T cell	0.023124	0.0183772	0.255033
RA	CD25hi CD45RA- CD4 not Treg AC	-0.0183154	0.0223622	0.458757
RA	CD25hi CD45RA+ CD4 not Treg %CD4+	-0.000350866	0.0207875	0.986947
RA	CD25hi CD45RA+ CD4 not Treg %T cell	0.00158088	0.0231761	0.947109
RA	CD25hi CD45RA+ CD4 not Treg AC	0.0187075	0.0219807	0.414635
RA	CD27 on CD20-	0.0484258	0.0275316	0.329107
RA	CD27 on CD20- CD38-	0.0136683	0.0178222	0.485886
RA	CD27 on CD24+ CD27+	-0.00214388	0.0162155	0.896841
RA	CD27 on IgD- CD38-	-0.0163433	0.0201917	0.435438
RA	CD27 on IgD- CD38br	0.0523796	0.0333046	0.166839
RA	CD27 on IgD- CD38dim	-0.0200968	0.0194261	0.325261
RA	CD27 on IgD+ CD24+	-0.0163086	0.0158963	0.323633
RA	CD27 on IgD+ CD38- unsw mem	-0.0184664	0.0209638	0.401299
RA	CD27 on memory B cell	-0.0214449	0.0158966	0.210288
RA	CD27 on PB/PC	0.0713415	0.0396788	0.170025
RA	CD27 on sw mem	-0.00912354	0.0166674	0.595043
RA	CD27 on T cell	0.00779989	0.0205846	0.715979
RA	CD27 on unsw mem	0.0110213	0.0168156	0.522822
RA	CD28- CD127- CD25++ CD8br %CD8br	-0.00360326	0.0752857	0.966176
RA	CD28- CD127- CD25++ CD8br %T cell	-0.017769	0.0330448	0.644595
RA	CD28- CD127- CD25++ CD8br AC	-0.0107779	0.0155718	0.51967
RA	CD28- CD25++ CD8br %CD8br	-0.0749029	0.0540471	0.23804
RA	CD28- CD25++ CD8br %T cell	-0.0329472	0.0226386	0.183661
RA	CD28- CD25++ CD8br AC	-0.0831968	0.0360881	0.08245
RA	CD28- CD8br %CD8br	-0.0308464	0.0224726	0.212229
RA	CD28- CD8br %T cell	-0.00859457	0.0302978	0.790741
RA	CD28- CD8br AC	0.00467972	0.0252862	0.860447
RA	CD28- CD8dim %CD8dim	-0.0307089	0.040995	0.487527
RA	CD28- CD8dim %T cell	0.0113582	0.01672	0.512351
RA	CD28- CD8dim AC	-0.0160857	0.0172413	0.370859
RA	CD28- DN (CD4-CD8-) %DN	-0.0432862	0.032709	0.233901
RA	CD28- DN (CD4-CD8-) %T cell	-0.015457	0.0274272	0.588494
RA	CD28- DN (CD4-CD8-) AC	-0.0330812	0.0252805	0.219957
RA	CD28 on activated & secreting Treg	0.0283585	0.0231812	0.275704
RA	CD28 on activated Treg	-0.00605721	0.015004	0.707079
RA	CD28 on CD28+ CD4+	-0.0401442	0.0290956	0.216882
RA	CD28 on CD28+ CD45RA- CD8br	0.0515165	0.0166708	0.0213815
RA	CD28 on CD28+ CD45RA+ CD8br	0.0784472	0.0653646	0.283838
RA	CD28 on CD28+ DN (CD4-CD8-)	0.0448706	0.0259592	0.127528
RA	CD28 on CD39+ activated Treg	0.0376694	0.0484987	0.57959
RA	CD28 on CD39+ CD4+	-0.020316	0.0185858	0.35427
RA	CD28 on CD39+ CD8br	0.0123148	0.0338221	0.730671
RA	CD28 on CD39+ resting Treg	-0.0558919	0.0363462	0.167992
RA	CD28 on CD39+ secreting Treg	-0.0389737	0.0174994	0.0764384
RA	CD28 on CD4 Treg	-0.0127918	0.0238444	0.608253
RA	CD28 on CD4+	-0.0114964	0.0280274	0.692435
RA	CD28 on CD45RA- CD4 not Treg	0.0901556	0.084441	0.397469
RA	CD28 on CD45RA+ CD4+	-0.0267222	0.0357598	0.50914
RA	CD28 on resting Treg	0.0353169	0.0186032	0.0901138
RA	CD28 on secreting Treg	0.0586639	0.0166722	0.0125387
RA	CD28+ CD45RA- CD8br %CD8br	0.019715	0.0290503	0.546023
RA	CD28+ CD45RA- CD8br %T cell	0.005535	0.0145799	0.715473
RA	CD28+ CD45RA- CD8br AC	0.0110988	0.0199303	0.591187
RA	CD28+ CD45RA- CD8dim %CD8dim	0.0044945	0.0236463	0.854647
RA	CD28+ CD45RA- CD8dim %T cell	-0.0207148	0.0159871	0.231204
RA	CD28+ CD45RA- CD8dim AC	-0.0167617	0.0178592	0.375431
RA	CD28+ CD45RA+ CD8br %CD8br	0.00159881	0.0395159	0.969665
RA	CD28+ CD45RA+ CD8br %T cell	0.0147181	0.0327375	0.661743
RA	CD28+ CD45RA+ CD8br AC	-0.044363	0.0285606	0.154772
RA	CD28+ CD45RA+ CD8dim %CD8dim	0.00421642	0.0445458	0.926918
RA	CD28+ CD45RA+ CD8dim %T cell	-0.0163629	0.0169911	0.354539
RA	CD28+ CD45RA+ CD8dim AC	-0.0186408	0.0213304	0.399322
RA	CD28+ DN (CD4-CD8-) %DN	0.0432862	0.032709	0.233901
RA	CD28+ DN (CD4-CD8-) %T cell	0.006855	0.0233126	0.776206
RA	CD28+ DN (CD4-CD8-) AC	0.0570717	0.035757	0.251535
RA	CD3- lymphocyte %leukocyte	0.0342351	0.0395272	0.426025
RA	CD3- lymphocyte %lymphocyte	0.0744857	0.0322715	0.0822041
RA	CD3- lymphocyte AC	0.0207979	0.0511928	0.698641
RA	CD3 on activated & secreting Treg	0.000928468	0.0118544	0.938978
RA	CD3 on activated Treg	0.00807463	0.0145659	0.592843
RA	CD3 on CD28- CD8br	0.0245643	0.0345173	0.503397
RA	CD3 on CD28+ CD4+	0.0229583	0.0211117	0.29819
RA	CD3 on CD28+ CD45RA- CD8br	0.0313635	0.0217414	0.187124
RA	CD3 on CD28+ CD45RA+ CD8br	0.0116765	0.0152114	0.457554
RA	CD3 on CD28+ DN (CD4-CD8-)	0.00628436	0.0466253	0.901317
RA	CD3 on CD39+ activated Treg	0.00565685	0.0209965	0.795377
RA	CD3 on CD39+ CD4+	-0.00222172	0.0211215	0.919655
RA	CD3 on CD39+ CD8br	0.0210121	0.0167529	0.250013
RA	CD3 on CD39+ resting Treg	-0.0027893	0.0426329	0.951951
RA	CD3 on CD39+ secreting Treg	0.00963499	0.0136107	0.491506
RA	CD3 on CD4 Treg	-0.00181279	0.0127697	0.890238
RA	CD3 on CD4+	-0.0291501	0.0196409	0.165848
RA	CD3 on CD45RA- CD4+	0.0187348	0.0160902	0.265202
RA	CD3 on CD45RA+ CD4+	0.0083357	0.013462	0.549629
RA	CD3 on CD8br	0.0243615	0.0168825	0.199122
RA	CD3 on CM CD4+	0.00782121	0.021254	0.722429
RA	CD3 on CM CD8br	0.0268657	0.0191494	0.210203
RA	CD3 on EM CD4+	0.0123068	0.0135192	0.392921
RA	CD3 on EM CD8br	0.0338423	0.0220079	0.175031
RA	CD3 on HLA DR+ CD4+	0.0185957	0.0120732	0.147484
RA	CD3 on HLA DR+ CD8br	0.00983406	0.0162673	0.567634
RA	CD3 on HLA DR+ T cell	0.0441431	0.0211325	0.0701413
RA	CD3 on Naive CD4+	-0.0016264	0.0116195	0.890676
RA	CD3 on naive CD8br	0.0159618	0.01473	0.299826
RA	CD3 on NKT	-0.014714	0.028608	0.625409
RA	CD3 on resting Treg	-0.0254044	0.0154098	0.118726
RA	CD3 on secreting Treg	-0.0020978	0.0153284	0.894997
RA	CD3 on T cell	-0.000850827	0.0139008	0.951952
RA	CD3 on TD CD4+	0.055928	0.0277828	0.0839882
RA	CD3 on TD CD8br	-0.0332915	0.0262163	0.239818
RA	CD33- HLA DR- AC	0.0139868	0.0355906	0.720587
RA	CD33- HLA DR+ AC	-0.0652964	0.0437575	0.209918
RA	CD33 on basophil	0.0249787	0.0153285	0.154317
RA	CD33 on CD14+ monocyte	0.0130969	0.0117915	0.309211
RA	CD33 on CD33br HLA DR+	0.0189193	0.0103083	0.103782
RA	CD33 on CD33br HLA DR+ CD14-	0.0250822	0.0102186	0.0396538
RA	CD33 on CD33br HLA DR+ CD14dim	0.0159589	0.0105248	0.167909
RA	CD33 on CD33dim HLA DR-	0.021792	0.0150573	0.197974
RA	CD33 on CD33dim HLA DR+ CD11b-	0.0147025	0.010794	0.206281
RA	CD33 on CD33dim HLA DR+ CD11b+	0.01693	0.0100238	0.119333
RA	CD33 on CD66b++ myeloid cell	0.00598215	0.0118211	0.626465
RA	CD33 on Gr MDSC	0.0218913	0.0128693	0.132727
RA	CD33 on Im MDSC	0.0124747	0.0145669	0.420138
RA	CD33 on Mo MDSC	-0.00778144	0.0113087	0.513544
RA	CD33br HLA DR+ AC	0.0269974	0.016537	0.12851
RA	CD33br HLA DR+ CD14- %CD33br HLA DR+	-0.039163	0.0252302	0.164549
RA	CD33br HLA DR+ CD14- AC	0.0234282	0.0204404	0.284849
RA	CD33br HLA DR+ CD14dim %CD33br HLA DR+	-0.0172261	0.0703006	0.818487
RA	CD33br HLA DR+ CD14dim AC	0.0319205	0.0153479	0.0761076
RA	CD33dim HLA DR- AC	0.0327527	0.0218899	0.172956
RA	CD33dim HLA DR+ CD11b- %CD33dim HLA DR+	-0.0215915	0.0211342	0.353812
RA	CD33dim HLA DR+ CD11b- AC	-0.00914154	0.0160878	0.583776
RA	CD33dim HLA DR+ CD11b+ %CD33dim HLA DR+	-0.00489613	0.02266	0.836092
RA	CD33dim HLA DR+ CD11b+ AC	0.0416918	0.0283568	0.184955
RA	CD34 on HSC	0.0114995	0.035852	0.764458
RA	CD38 on CD20-	0.0121604	0.0329647	0.736706
RA	CD38 on CD3- CD19-	-0.00649079	0.0293161	0.833534
RA	CD38 on IgD- CD38br	NA	NA	NA
RA	CD38 on IgD- CD38dim	-0.00214857	0.0222917	0.926959
RA	CD38 on IgD+	-0.000444552	0.0524897	0.993648
RA	CD38 on IgD+ CD24-	0.0115603	0.0293746	0.704196
RA	CD38 on IgD+ CD38br	0.111632	0.0839492	0.254361
RA	CD38 on IgD+ CD38dim	0.0504877	0.0148031	0.00665146
RA	CD38 on naive-mature B cell	0.029385	0.0206065	0.187617
RA	CD38 on PB/PC	0.00891128	0.0219531	0.705576
RA	CD38 on transitional	0.0367472	0.0147733	0.0345689
RA	CD39 on CD39+ activated Treg	0.0126834	0.0303029	0.686552
RA	CD39 on CD39+ CD4+	0.00563274	0.00767388	0.478294
RA	CD39 on CD39+ CD8br	0.0474602	0.0380114	0.258329
RA	CD39 on CD39+ secreting Treg	-0.0140483	0.0087765	0.140533
RA	CD39 on granulocyte	-0.027502	0.0201681	0.199935
RA	CD39 on monocyte	0.00378284	0.0361538	0.918963
RA	CD39+ activated Treg %activated Treg	-0.0107337	0.0375146	0.783068
RA	CD39+ activated Treg %CD4 Treg	0.00338046	0.00939032	0.727154
RA	CD39+ activated Treg AC	-0.0150511	0.00890626	0.111708
RA	CD39+ CD4+ %CD4+	0.0199566	0.0156793	0.229333
RA	CD39+ CD4+ %T cell	0.0169474	0.0158821	0.303994
RA	CD39+ CD4+ AC	0.0212155	0.0151904	0.192745
RA	CD39+ CD8br %CD8br	0.0183132	0.0370516	0.638693
RA	CD39+ CD8br %T cell	0.0571578	0.0462149	0.262379
RA	CD39+ CD8br AC	0.00498958	0.020945	0.817696
RA	CD39+ resting Treg % CD4 Treg	-0.000382268	0.0102013	0.970725
RA	CD39+ resting Treg %resting Treg	0.00791072	0.0114546	0.504121
RA	CD39+ resting Treg AC	0.00418679	0.0169091	0.809
RA	CD39+ secreting Treg AC	-0.010126	0.0121217	0.42513
RA	CD39+ secreting Treg %CD4 Treg	0.00682545	0.0255756	0.796316
RA	CD39+ secreting Treg %secreting Treg	0.00767802	0.0186902	0.68988
RA	CD4 on activated & secreting Treg	0.00304673	0.0268773	0.913445
RA	CD4 on activated Treg	0.023636	0.0238684	0.395049
RA	CD4 on CD28+ CD4+	-0.0321447	0.0467639	0.529623
RA	CD4 on CD39+ activated Treg	0.0752435	0.0695917	0.358765
RA	CD4 on CD39+ CD4+	-0.00497759	0.0160597	0.762398
RA	CD4 on CD39+ resting Treg	0.027688	0.0714066	0.735577
RA	CD4 on CD39+ secreting Treg	0.0011134	0.0273393	0.968836
RA	CD4 on CD4 Treg	-0.00584439	0.0240951	0.813787
RA	CD4 on CD4+	0.00744036	0.0375795	0.852708
RA	CD4 on CD45RA+ CD4+	0.0210469	0.0275189	0.487012
RA	CD4 on CM CD4 +	-0.00674832	0.0281276	0.822187
RA	CD4 on EM CD4+	-0.0459792	0.0257508	0.172157
RA	CD4 on HLA DR+ CD4+	0.0173969	0.0325553	0.621399
RA	CD4 on monocyte	0.000788525	0.0306876	0.980494
RA	CD4 on naive CD4+	-0.0123642	0.0323301	0.717854
RA	CD4 on resting Treg	-0.0439339	0.046616	0.518851
RA	CD4 on secreting Treg	-0.00434156	0.0205142	0.836641
RA	CD4 on TD CD4+	-0.031252	0.0376616	0.444445
RA	CD4 Treg %CD4	0.0512122	0.0580752	0.41824
RA	CD4 Treg %T cell	-0.00919128	0.0328418	0.793457
RA	CD4 Treg AC	0.0385983	0.0499651	0.482924
RA	CD4/CD8br	0.0769048	0.047527	0.3524
RA	CD4+ %leukocyte	-0.0195319	0.0804818	0.830867
RA	CD4+ %T cell	-0.00324808	0.0264909	0.913625
RA	CD4+ AC	0.0185328	0.0370424	0.638093
RA	CD4+ CD8dim %leukocyte	0.110333	0.0535588	0.0944289
RA	CD4+ CD8dim %lymphocyte	0.15654	0.0573929	0.0414025
RA	CD4+ CD8dim AC	0.0601074	0.111311	0.626709
RA	CD40 on CD14- CD16+ monocyte	-0.00175152	0.0161235	0.916543
RA	CD40 on CD14+ CD16- monocyte	-0.0206266	0.0124825	0.149531
RA	CD40 on CD14+ CD16+ monocyte	-0.0104554	0.0289201	0.730097
RA	CD40 on monocytes	-0.0380249	0.0128422	0.0252527
RA	CD45 on B cell	0.00499753	0.032435	0.887329
RA	CD45 on basophil	-0.0285395	0.0310693	0.40046
RA	CD45 on CD14+ monocyte	NA	NA	NA
RA	CD45 on CD33- HLA DR-	0.0243376	0.0811751	0.783891
RA	CD45 on CD33- HLA DR+	0.0083935	0.0241178	0.739709
RA	CD45 on CD33br HLA DR+	0.0124296	0.0445524	0.791425
RA	CD45 on CD33br HLA DR+ CD14-	0.0145089	0.0252847	0.584047
RA	CD45 on CD33br HLA DR+ CD14dim	-0.0686591	0.0521124	0.318349
RA	CD45 on CD33dim HLA DR-	-0.0138213	0.0424543	0.775665
RA	CD45 on CD33dim HLA DR+ CD11b-	-0.0336303	0.0326283	0.360918
RA	CD45 on CD4+	0.0069614	0.0215594	0.759841
RA	CD45 on CD66b++ myelod cell	0.230064	0.300541	0.584066
RA	CD45 on CD8br	0.00169489	0.0167283	0.922599
RA	CD45 on Gr MDSC	-0.0573038	0.0889601	0.554554
RA	CD45 on granulocyte	-0.000696626	0.0200214	0.973911
RA	CD45 on HLA DR+ CD4+	0.0525971	0.211442	0.826763
RA	CD45 on HLA DR+ CD8br	-0.0341879	0.0170865	0.101826
RA	CD45 on HLA DR+ NK	NA	NA	NA
RA	CD45 on HLA DR+ T cell	-0.0274582	0.0368618	0.49772
RA	CD45 on Im MDSC	NA	NA	NA
RA	CD45 on lymphocyte	0.051397	0.0321379	0.18501
RA	CD45 on lymphocyte_duplicate	0.00115834	0.0226515	0.960645
RA	CD45 on Mo MDSC	0.0260232	0.0497994	0.637415
RA	CD45 on NK	0.0412636	0.0263261	0.148091
RA	CD45 on NKT	-0.0241628	0.0210248	0.302441
RA	CD45 on T cell	0.0146376	0.104373	0.901316
RA	CD45RA- CD28- CD8br %CD8br	0.020657	0.02629	0.454662
RA	CD45RA- CD28- CD8br %T cell	0.000819969	0.0228552	0.971887
RA	CD45RA- CD28- CD8br AC	-0.017733	0.0109218	0.113692
RA	CD45RA- CD4+ %CD4+	-0.0314515	0.0208717	0.170262
RA	CD45RA- CD4+ %T cell	0.0214795	0.0308475	0.503817
RA	CD45RA- CD4+ AC	0.0349225	0.0217684	0.152687
RA	CD45RA on CD39+ resting Treg	-0.00539549	0.016068	0.745666
RA	CD45RA on naive CD4+	-0.0626761	0.0289244	0.0584083
RA	CD45RA on naive CD8br	0.0253134	0.0723504	0.735467
RA	CD45RA on resting Treg	0.0435017	0.047935	0.415464
RA	CD45RA on TD CD8br	-0.0648719	0.0398144	0.178569
RA	CD45RA+ CD28- CD8br %CD8br	-0.0354313	0.0212364	0.156103
RA	CD45RA+ CD28- CD8br %T cell	-0.00467696	0.0157441	0.771954
RA	CD45RA+ CD28- CD8br AC	0.0081401	0.0106701	0.447134
RA	CD45RA+ CD8br %CD8br	0.0191942	0.0198049	0.36475
RA	CD45RA+ CD8br %T cell	-0.0438883	0.0438812	0.350544
RA	CD45RA+ CD8br AC	-0.0171635	0.0488539	0.743071
RA	CD4RA on TD CD4+	0.0290073	0.0575148	0.640533
RA	CD62L- CD86+ myeloid DC %DC	-0.00990742	0.0144958	0.524692
RA	CD62L- CD86+ myeloid DC AC	-0.0111745	0.0237276	0.657509
RA	CD62L- DC %DC	-0.0356186	0.0137413	0.032009
RA	CD62L- DC AC	-0.0483355	0.0195779	0.0690298
RA	CD62L- HLA DR++ monocyte %monocyte	0.0301342	0.0567761	0.632369
RA	CD62L- HLA DR++ monocyte AC	-0.0283314	0.0275987	0.362653
RA	CD62L- monocyte %monocyte	0.00727153	0.0198147	0.722117
RA	CD62L- monocyte AC	-0.0114755	0.0404197	0.784694
RA	CD62L- myeloid DC %DC	-0.0363906	0.0132649	0.033585
RA	CD62L- myeloid DC AC	-0.0452517	0.0173412	0.0476993
RA	CD62L- plasmacytoid DC %DC	0.0480352	0.0270914	0.174327
RA	CD62L- plasmacytoid DC AC	-0.00126844	0.0200385	0.95108
RA	CD62L on CD62L+ DC	-0.0102538	0.0490982	0.839221
RA	CD62L on CD62L+ myeloid DC	0.0119632	0.0259596	0.664264
RA	CD62L on CD62L+ plasmacytoid DC	0.0277514	0.0348533	0.484082
RA	CD62L on granulocyte	-0.0434475	0.0355226	0.288424
RA	CD62L on monocyte	0.000698911	0.0171852	0.968879
RA	CD64 on CD14- CD16-	0.032411	0.0367159	0.417785
RA	CD64 on CD14- CD16+ monocyte	0.0139038	0.0456964	0.766604
RA	CD64 on CD14+ CD16- monocyte	-0.00354711	0.01626	0.832775
RA	CD64 on CD14+ CD16+ monocyte	0.0489898	0.029116	0.143449
RA	CD64 on monocyte	0.0344035	0.02373	0.181054
RA	CD66b on CD66b++ myeloid cell	0.0244142	0.0276858	0.403585
RA	CD66b on Gr MDSC	-0.00805736	0.0188669	0.682161
RA	CD66b++ myeloid cell AC	0.0811146	0.0424275	0.196048
RA	CD8 on CD8br	0.00810193	0.0187412	0.683528
RA	CD8 on CD28- CD8br	0.110079	0.125433	0.409276
RA	CD8 on CD28+ CD45RA- CD8br	-0.0651199	0.0504283	0.325703
RA	CD8 on CD28+ CD45RA+ CD8br	0.00847635	0.0150549	0.603477
RA	CD8 on CD39+ CD8br	0.0233647	0.0525905	0.668615
RA	CD8 on CM CD8br	-0.0258748	0.0301086	0.45332
RA	CD8 on EM CD8br	0.0195548	0.0276674	0.499768
RA	CD8 on HLA DR+ CD8br	0.0224879	0.02302	0.37349
RA	CD8 on naive CD8br	0.185968	0.206672	0.533538
RA	CD8 on NKT	0.042343	0.0224929	0.156308
RA	CD8 on TD CD8br	-0.00203728	0.0456582	0.966549
RA	CD80 on CD62L+ myeloid DC	-0.00810076	0.0174073	0.654076
RA	CD80 on CD62L+ plasmacytoid DC	0.00640404	0.0310992	0.84366
RA	CD80 on granulocyte	0.00668401	0.0178235	0.712576
RA	CD80 on monocyte	-0.0277571	0.0143746	0.0823008
RA	CD80 on myeloid DC	-0.0215515	0.0202212	0.311578
RA	CD80 on plasmacytoid DC	0.0260291	0.0254492	0.340448
RA	CD86 on CD62L+ myeloid DC	0.0283296	0.0207932	0.231217
RA	CD86 on granulocyte	0.0395281	0.0261523	0.174426
RA	CD86 on monocyte	-0.0293918	0.0252199	0.364041
RA	CD86 on myeloid DC	-0.0363859	0.0219433	0.135867
RA	CD86+ myeloid DC %DC	-0.0273572	0.0131617	0.0762486
RA	CD86+ myeloid DC AC	-0.0313297	0.0180215	0.180516
RA	CD86+ plasmacytoid DC %DC	0.0579024	0.0191653	0.0106389
RA	CD86+ plasmacytoid DC AC	-0.0272961	0.0172718	0.15803
RA	CD8br %leukocyte	0.0252676	0.0366082	0.528018
RA	CD8br %T cell	0.02869	0.0443079	0.563433
RA	CD8br AC	0.0456766	0.023673	0.0949944
RA	CD8br and CD8dim %leukocyte	-0.00324771	0.0599318	0.959382
RA	CD8br NKT %lymphocyte	-0.0319222	0.0336392	0.374245
RA	CD8br NKT %T cell	-0.028161	0.0313706	0.399174
RA	CD8br NKT AC	-0.0237723	0.029965	0.45363
RA	CD8dim %leukocyte	0.0107517	0.0222788	0.649769
RA	CD8dim %T cell	0.0173942	0.0325776	0.630419
RA	CD8dim AC	0.00955609	0.0200387	0.65356
RA	CD8dim NKT %lymphocyte	-0.0254331	0.0195495	0.222449
RA	CD8dim NKT %T cell	-0.0170472	0.0183386	0.376847
RA	CD8dim NKT AC	-0.00944438	0.0158812	0.563095
RA	CM CD8br %CD8br	0.0182527	0.0242829	0.469572
RA	CM CD4+ %CD4+	-0.025053	0.0152083	0.125409
RA	CM CD4+ %T cell	0.0157669	0.0369443	0.684433
RA	CM CD4+ AC	0.00147919	0.0185524	0.939045
RA	CM CD8br %T cell	-0.0640095	0.0573192	0.326664
RA	CM CD8br AC	0.00185305	0.0339837	0.95913
RA	CM DN (CD4-CD8-) %T cell	NA	NA	NA
RA	CX3CR1 on CD14- CD16-	-0.0124292	0.107782	0.918727
RA	CX3CR1 on CD14- CD16+ monocyte	-0.0450148	0.0665511	0.523993
RA	CX3CR1 on CD14+ CD16- monocyte	0.0298385	0.020972	0.192602
RA	CX3CR1 on CD14+ CD16+ monocyte	0.0130367	0.0205642	0.541889
RA	CX3CR1 on monocyte	0.0103699	0.0283666	0.724165
RA	DC AC	-0.0166892	0.014217	0.278827
RA	DN (CD4-CD8-) %leukocyte	-0.00660061	0.0231067	0.784745
RA	DN (CD4-CD8-) %T cell	-0.0054049	0.0216541	0.81519
RA	DN (CD4-CD8-) AC	0.000310085	0.0268964	0.991123
RA	DN (CD4-CD8-) NKT %lymphocyte	-0.00992404	0.0221233	0.661729
RA	DN (CD4-CD8-) NKT %T cell	0.00852643	0.0200356	0.678632
RA	DN (CD4-CD8-) NKT AC	-0.0157136	0.0195014	0.43487
RA	DP (CD4+CD8+) %leukocyte	-0.0174674	0.0180476	0.355943
RA	DP (CD4+CD8+) %T cell	-0.0199944	0.0154541	0.224819
RA	DP (CD4+CD8+) AC	0.00636094	0.0205129	0.766977
RA	EM CD4+ %CD4+	-0.00177658	0.0264088	0.948246
RA	EM CD4+ %T cell	-0.000577081	0.0191004	0.976741
RA	EM CD4+ AC	0.0501414	0.0334054	0.193655
RA	EM CD8br %CD8br	-0.00943927	0.0217112	0.678934
RA	EM CD8br %T cell	-0.00698679	0.0318489	0.837099
RA	EM CD8br AC	0.00529076	0.0344006	0.881578
RA	EM DN (CD4-CD8-) %DN	0.000208947	0.0242228	0.993248
RA	EM DN (CD4-CD8-) %T cell	-0.0270079	0.0255399	0.325416
RA	EM DN (CD4-CD8-) AC	-0.00586903	0.028574	0.843107
RA	FSC-A on B cell	-0.00707724	0.0209489	0.752475
RA	FSC-A on CD14+ monocyte	0.0431427	0.0452441	0.394307
RA	FSC-A on CD4+	0.0513249	0.0340763	0.206488
RA	FSC-A on CD8br	0.0142988	0.0171068	0.435255
RA	FSC-A on granulocyte	0.0258934	0.0174418	0.188198
RA	FSC-A on HLA DR+ CD4+	0.0249345	0.028174	0.426142
RA	FSC-A on HLA DR+ CD8br	-0.0109712	0.020237	0.616515
RA	FSC-A on HLA DR+ NK	0.00540089	0.0185812	0.781093
RA	FSC-A on HLA DR+ T cell	-0.111307	0.262534	0.712834
RA	FSC-A on lymphocyte	0.00699333	0.0685674	0.923671
RA	FSC-A on monocyte	0.0425262	0.0411235	0.328071
RA	FSC-A on myeloid DC	0.00409248	0.0304086	0.896266
RA	FSC-A on NK	-0.00969472	0.0238296	0.696281
RA	FSC-A on NKT	0.0949116	0.0854352	0.382264
RA	FSC-A on plasmacytoid DC	0.0211543	0.0259341	0.44584
RA	FSC-A on T cell	0.0357747	0.0232709	0.184824
RA	Gr MDSC AC	0.0346062	0.0253065	0.208655
RA	Granulocyte %leukocyte	0.0130095	0.0357747	0.728588
RA	Granulocyte AC	0.00655075	0.0218941	0.773475
RA	HLA DR on HLA DR+ CD4+	-0.0290559	0.0612238	0.66749
RA	HLA DR on HLA DR+ CD8br	-0.0499618	0.0294229	0.231593
RA	HLA DR on HLA DR+ T cell	-0.00384897	0.0401044	0.928157
RA	HLA DR on B cell	-0.000444831	0.0298562	0.989048
RA	HLA DR on CD14- CD16-	-0.00526358	0.0324011	0.876284
RA	HLA DR on CD14- CD16+ monocyte	-0.029879	0.0594734	0.641789
RA	HLA DR on CD14+ CD16- monocyte	0.0666386	0.0340727	0.14545
RA	HLA DR on CD14+ CD16+ monocyte	-0.0100181	0.0224652	0.68586
RA	HLA DR on CD14+ monocyte	0.0507615	0.0416844	0.31036
RA	HLA DR on CD33- HLA DR+	0.00952582	0.0363982	0.803983
RA	HLA DR on CD33br HLA DR+ CD14-	-0.0839545	0.042474	0.0954717
RA	HLA DR on CD33br HLA DR+ CD14dim	0.00764163	0.120424	0.953395
RA	HLA DR on CD33dim HLA DR+ CD11b-	-0.0010706	0.0907586	0.990917
RA	HLA DR on CD33dim HLA DR+ CD11b+	0.0196218	0.0253801	0.468807
RA	HLA DR on DC	0.0174207	0.0441285	0.706662
RA	HLA DR on HLA DR+ NK	0.0160992	0.030741	0.613134
RA	HLA DR on HSC	0.00806657	0.0371803	0.833672
RA	HLA DR on monocyte	NA	NA	NA
RA	HLA DR on myeloid DC	0.0884888	0.0762696	0.298346
RA	HLA DR on plasmacytoid DC	-0.0622259	0.0258608	0.0738595
RA	HLA DR+ CD4+ %lymphocyte	-0.00836835	0.0185529	0.665592
RA	HLA DR+ CD4+ %T cell	-0.00978559	0.0199331	0.638496
RA	HLA DR+ CD4+ AC	0.0187096	0.0177235	0.331775
RA	HLA DR+ CD8br %lymphocyte	0.00346915	0.0115083	0.767505
RA	HLA DR+ CD8br %T cell	-0.00255849	0.0115396	0.827982
RA	HLA DR+ CD8br AC	-0.0149937	0.0125601	0.251111
RA	HLA DR+ NK %CD3- lymphocyte	0.0277628	0.0119443	0.0485873
RA	HLA DR+ NK %NK	0.0283417	0.0123642	0.0448423
RA	HLA DR+ NK AC	0.0292987	0.0178109	0.175317
RA	HLA DR+ T cell AC	-0.00231752	0.0132683	0.864515
RA	HLA DR+ T cell%lymphocyte	0.00906664	0.0149991	0.564597
RA	HLA DR+ T cell%T cell	-0.000341048	0.0141375	0.981427
RA	HLA DR++ monocyte %monocyte	-0.0099667	0.0400184	0.815586
RA	HLA DR++ monocyte AC	0.020317	0.108317	0.863183
RA	HSC AC	0.010957	0.0189133	0.587489
RA	HVEM on CD4+	-0.0312505	0.0325243	0.364772
RA	HVEM on CD45RA- CD4+	0.039201	0.0273481	0.194856
RA	HVEM on CD8br	-0.025451	0.0741667	0.754118
RA	HVEM on CM CD8br	-0.00113284	0.0510023	0.982899
RA	HVEM on EM CD4+	-0.0108308	0.0602879	0.86448
RA	HVEM on EM CD8br	-0.0188786	0.108	0.877329
RA	HVEM on naive CD4+	-0.100054	0.0715447	0.220833
RA	HVEM on naive CD8br	-0.0224746	0.0545139	0.690966
RA	HVEM on T cell	0.0612178	0.0435172	0.202313
RA	HVEM on TD CD4+	0.00201678	0.0716492	0.978457
RA	HVEM on TD CD8br	-0.0197079	0.0269128	0.484891
RA	IgD- CD24- %B cell	-0.084207	0.0356238	0.0773433
[truncated: 140 more rows]

## Sheet: Table 5
Supplementary Table 5: The result of MR between plasma metabolites, immune cells and RA.
Outcome	Exposure	Method	N SNP	b	se	P value
RA	Adenosine 5'-diphosphate (ADP) to N-palmitoyl-sphingosine (d18:1 to 16:0) ratio	MR Egger	16	-0.00735687	0.0872488	0.933995
RA	Adenosine 5'-diphosphate (ADP) to N-palmitoyl-sphingosine (d18:1 to 16:0) ratio	Weighted median	16	0.0117493	0.0501397	0.814728
RA	Adenosine 5'-diphosphate (ADP) to N-palmitoyl-sphingosine (d18:1 to 16:0) ratio	Inverse variance weighted	16	0.00480397	0.0372179	0.897297
RA	Adenosine 5'-diphosphate (ADP) to N-palmitoyl-sphingosine (d18:1 to 16:0) ratio	Simple mode	16	0.0532785	0.0867063	0.548112
RA	Adenosine 5'-diphosphate (ADP) to N-palmitoyl-sphingosine (d18:1 to 16:0) ratio	Weighted mode	16	0.0496652	0.077725	0.532469
RA	1-palmitoyl-2-stearoyl-gpc (16:0/18:0) levels	MR Egger	22	0.238533	0.0936416	0.0191878
RA	1-palmitoyl-2-stearoyl-gpc (16:0/18:0) levels	Weighted median	22	0.115167	0.055716	0.0387313
RA	1-palmitoyl-2-stearoyl-gpc (16:0/18:0) levels	Inverse variance weighted	22	0.0763468	0.0380742	0.0449402
RA	1-palmitoyl-2-stearoyl-gpc (16:0/18:0) levels	Simple mode	22	0.0947498	0.0993545	0.351108
RA	1-palmitoyl-2-stearoyl-gpc (16:0/18:0) levels	Weighted mode	22	0.1594	0.0570659	0.0108929
RA	Mannitol/sorbitol levels	MR Egger	15	-0.414808	0.198949	0.0573522
RA	Mannitol/sorbitol levels	Weighted median	15	-0.0460861	0.0828105	0.577852
RA	Mannitol/sorbitol levels	Inverse variance weighted	15	0.0280488	0.0678719	0.679416
RA	Mannitol/sorbitol levels	Simple mode	15	-0.0973015	0.162409	0.558667
RA	Mannitol/sorbitol levels	Weighted mode	15	-0.103906	0.150519	0.501279
RA	Maltose to sucrose ratio	MR Egger	15	-0.0619679	0.159954	0.704721
RA	Maltose to sucrose ratio	Weighted median	15	0.0705102	0.0714911	0.323996
RA	Maltose to sucrose ratio	Inverse variance weighted	15	0.0309037	0.0544238	0.570148
RA	Maltose to sucrose ratio	Simple mode	15	0.0813144	0.119268	0.506501
RA	Maltose to sucrose ratio	Weighted mode	15	0.0832081	0.102278	0.429525
RA	Octadecanedioylcarnitine (C18-DC) levels	MR Egger	18	-0.0190004	0.0509645	0.714178
RA	Octadecanedioylcarnitine (C18-DC) levels	Weighted median	18	-0.0287475	0.0350229	0.411749
RA	Octadecanedioylcarnitine (C18-DC) levels	Inverse variance weighted	18	-0.0140311	0.0290412	0.628993
RA	Octadecanedioylcarnitine (C18-DC) levels	Simple mode	18	0.0832018	0.0726067	0.267702
RA	Octadecanedioylcarnitine (C18-DC) levels	Weighted mode	18	-0.0201817	0.0349991	0.571743
RA	Cysteine to alanine ratio	MR Egger	24	-0.0620367	0.129622	0.636948
RA	Cysteine to alanine ratio	Weighted median	24	0	0.0709162	1
RA	Cysteine to alanine ratio	Inverse variance weighted	24	-0.0665849	0.0506928	0.189015
RA	Cysteine to alanine ratio	Simple mode	24	-0.0608232	0.126433	0.635011
RA	Cysteine to alanine ratio	Weighted mode	24	-0.0187073	0.101275	0.85507
RA	Cysteinylglycine to glutamate ratio	MR Egger	20	0.0368875	0.191033	0.849047
RA	Cysteinylglycine to glutamate ratio	Weighted median	20	0	0.0756667	1
RA	Cysteinylglycine to glutamate ratio	Inverse variance weighted	20	-0.00308494	0.0663031	0.962889
RA	Cysteinylglycine to glutamate ratio	Simple mode	20	-0.0190966	0.124276	0.879496
RA	Cysteinylglycine to glutamate ratio	Weighted mode	20	-0.0379633	0.104426	0.720212
RA	Benzoate to linoleoyl-arachidonoyl-glycerol (18:2 to 20:4) [1] ratio	MR Egger	10	-0.219571	0.105918	0.0718908
RA	Benzoate to linoleoyl-arachidonoyl-glycerol (18:2 to 20:4) [1] ratio	Weighted median	10	-0.126878	0.0521244	0.0149272
RA	Benzoate to linoleoyl-arachidonoyl-glycerol (18:2 to 20:4) [1] ratio	Inverse variance weighted	10	-0.131431	0.0436433	0.00259982
RA	Benzoate to linoleoyl-arachidonoyl-glycerol (18:2 to 20:4) [1] ratio	Simple mode	10	0.0189332	0.116851	0.874862
RA	Benzoate to linoleoyl-arachidonoyl-glycerol (18:2 to 20:4) [1] ratio	Weighted mode	10	-0.179627	0.0545001	0.00929047
RA	Tryptophan betaine levels	MR Egger	30	-0.0888641	0.0611488	0.157272
RA	Tryptophan betaine levels	Weighted median	30	0	0.0446429	1
RA	Tryptophan betaine levels	Inverse variance weighted	30	-0.0319137	0.0317704	0.315132
RA	Tryptophan betaine levels	Simple mode	30	-0.0122932	0.0716751	0.865012
RA	Tryptophan betaine levels	Weighted mode	30	-0.042429	0.051397	0.415819
RA	Pimeloylcarnitine/3-methyladipoylcarnitine (C7-DC) levels	MR Egger	26	0.0717314	0.0868343	0.4169
RA	Pimeloylcarnitine/3-methyladipoylcarnitine (C7-DC) levels	Weighted median	26	0.0480841	0.0614948	0.434261
RA	Pimeloylcarnitine/3-methyladipoylcarnitine (C7-DC) levels	Inverse variance weighted	26	-0.016537	0.0396745	0.676812
RA	Pimeloylcarnitine/3-methyladipoylcarnitine (C7-DC) levels	Simple mode	26	0.0658183	0.0992269	0.513202
RA	Pimeloylcarnitine/3-methyladipoylcarnitine (C7-DC) levels	Weighted mode	26	0.0658183	0.0770862	0.401308
RA	X-22509 levels	MR Egger	14	-0.0287638	0.199931	0.887992
RA	X-22509 levels	Weighted median	14	-0.0558207	0.0683999	0.414447
RA	X-22509 levels	Inverse variance weighted	14	-0.0429319	0.0718057	0.549913
RA	X-22509 levels	Simple mode	14	-0.0662853	0.0984876	0.512714
RA	X-22509 levels	Weighted mode	14	-0.0622234	0.0829816	0.466702
RA	Phosphate to tyrosine ratio	MR Egger	26	-0.0367171	0.104804	0.729139
RA	Phosphate to tyrosine ratio	Weighted median	26	0.0535911	0.0644633	0.40578
RA	Phosphate to tyrosine ratio	Inverse variance weighted	26	0.000296571	0.0425343	0.994437
RA	Phosphate to tyrosine ratio	Simple mode	26	0.0872161	0.109227	0.432109
RA	Phosphate to tyrosine ratio	Weighted mode	26	0.0702205	0.0966045	0.474048
RA	Argininate levels	MR Egger	19	-0.0635765	0.133582	0.64018
RA	Argininate levels	Weighted median	19	-0.0808737	0.0691415	0.242128
RA	Argininate levels	Inverse variance weighted	19	-0.0263426	0.050702	0.603372
RA	Argininate levels	Simple mode	19	-0.0628527	0.098264	0.53047
RA	Argininate levels	Weighted mode	19	-0.0692427	0.0856985	0.429652
RA	Ximenoylcarnitine (C26:1) levels	MR Egger	27	0.0161636	0.0765355	0.83445
RA	Ximenoylcarnitine (C26:1) levels	Weighted median	27	0	0.0494484	1
RA	Ximenoylcarnitine (C26:1) levels	Inverse variance weighted	27	0.0198067	0.0350988	0.572542
RA	Ximenoylcarnitine (C26:1) levels	Simple mode	27	0.0476452	0.0788727	0.551028
RA	Ximenoylcarnitine (C26:1) levels	Weighted mode	27	0.0314627	0.0505594	0.53917
RA	5alpha-pregnan-diol disulfate levels	MR Egger	19	0.0389489	0.0790844	0.628668
RA	5alpha-pregnan-diol disulfate levels	Weighted median	19	0.0261109	0.0496965	0.5993
RA	5alpha-pregnan-diol disulfate levels	Inverse variance weighted	19	0.0156637	0.0349473	0.654003
RA	5alpha-pregnan-diol disulfate levels	Simple mode	19	0.0577302	0.0814034	0.487294
RA	5alpha-pregnan-diol disulfate levels	Weighted mode	19	0.0351918	0.0508143	0.497426
RA	Spermidine to histidine ratio	MR Egger	10	-0.192058	0.189472	0.340422
RA	Spermidine to histidine ratio	Weighted median	10	-0.111822	0.0925136	0.226774
RA	Spermidine to histidine ratio	Inverse variance weighted	10	-0.117579	0.0685284	0.0862052
RA	Spermidine to histidine ratio	Simple mode	10	-0.273009	0.163959	0.130247
RA	Spermidine to histidine ratio	Weighted mode	10	0.0577542	0.160641	0.727495
RA	Aspartate to mannose ratio	MR Egger	17	0.0667707	0.124413	0.599355
RA	Aspartate to mannose ratio	Weighted median	17	-0.0867269	0.0520969	0.0959684
RA	Aspartate to mannose ratio	Inverse variance weighted	17	-0.00741725	0.0394241	0.850767
RA	Aspartate to mannose ratio	Simple mode	17	-0.0871918	0.0861315	0.326454
RA	Aspartate to mannose ratio	Weighted mode	17	-0.0706204	0.0531521	0.202603
RA	X-16580 levels	MR Egger	13	0.0794433	0.305731	0.799781
RA	X-16580 levels	Weighted median	13	0.0475188	0.0959982	0.620602
RA	X-16580 levels	Inverse variance weighted	13	0.0333865	0.0709784	0.638087
RA	X-16580 levels	Simple mode	13	-0.0452754	0.147868	0.764708
RA	X-16580 levels	Weighted mode	13	0.00459397	0.12322	0.970873
RA	X-14939 levels	MR Egger	16	0.104234	0.103955	0.333032
RA	X-14939 levels	Weighted median	16	0	0.0751665	1
RA	X-14939 levels	Inverse variance weighted	16	-0.0233417	0.0514074	0.649791
RA	X-14939 levels	Simple mode	16	0.0999468	0.12572	0.439016
RA	X-14939 levels	Weighted mode	16	0.0130424	0.0824278	0.876387
RA	Paraxanthine to 5-acetylamino-6-formylamino-3-methyluracil ratio	MR Egger	18	-0.13514	0.144202	0.362609
RA	Paraxanthine to 5-acetylamino-6-formylamino-3-methyluracil ratio	Weighted median	18	0.000423071	0.0784735	0.995698
RA	Paraxanthine to 5-acetylamino-6-formylamino-3-methyluracil ratio	Inverse variance weighted	18	-0.0174154	0.0523627	0.739443
RA	Paraxanthine to 5-acetylamino-6-formylamino-3-methyluracil ratio	Simple mode	18	0.112005	0.129321	0.398492
RA	Paraxanthine to 5-acetylamino-6-formylamino-3-methyluracil ratio	Weighted mode	18	0.0661563	0.106505	0.542735
RA	N6-acetyllysine levels	MR Egger	15	0.0641633	0.0575562	0.285124
RA	N6-acetyllysine levels	Weighted median	15	-0.0030298	0.0459988	0.947484
RA	N6-acetyllysine levels	Inverse variance weighted	15	-0.0119973	0.0417811	0.774
RA	N6-acetyllysine levels	Simple mode	15	-0.110585	0.0947757	0.262779
RA	N6-acetyllysine levels	Weighted mode	15	0.043417	0.045719	0.358398
RA	X-17346 levels	MR Egger	16	-0.3049	0.148059	0.0585683
RA	X-17346 levels	Weighted median	16	-0.111498	0.0736412	0.130006
RA	X-17346 levels	Inverse variance weighted	16	-0.0467809	0.0495773	0.345376
RA	X-17346 levels	Simple mode	16	-0.118675	0.124991	0.35743
RA	X-17346 levels	Weighted mode	16	-0.118675	0.102042	0.262997
RA	Creatinine levels	MR Egger	17	0.143677	0.233255	0.547151
RA	Creatinine levels	Weighted median	17	0	0.105838	1
RA	Creatinine levels	Inverse variance weighted	17	0.0372464	0.073411	0.611896
RA	Creatinine levels	Simple mode	17	0.0207052	0.179658	0.909682
RA	Creatinine levels	Weighted mode	17	0.0283146	0.174655	0.873243
RA	2-methoxyresorcinol sulfate levels	MR Egger	16	-0.105584	0.124785	0.411713
RA	2-methoxyresorcinol sulfate levels	Weighted median	16	-0.106284	0.0675068	0.115391
RA	2-methoxyresorcinol sulfate levels	Inverse variance weighted	16	-0.0729346	0.050527	0.148886
RA	2-methoxyresorcinol sulfate levels	Simple mode	16	-0.119162	0.111946	0.303958
RA	2-methoxyresorcinol sulfate levels	Weighted mode	16	-0.13056	0.096259	0.195058
RA	Cys-gly,oxidized levels	MR Egger	21	-0.12625	0.0613464	0.0535761
RA	Cys-gly,oxidized levels	Weighted median	21	-0.0991246	0.0462504	0.0320959
RA	Cys-gly,oxidized levels	Inverse variance weighted	21	-0.0719865	0.0366744	0.0496629
RA	Cys-gly,oxidized levels	Simple mode	21	-0.0994489	0.097261	0.318756
RA	Cys-gly,oxidized levels	Weighted mode	21	-0.103026	0.0494936	0.0504366
RA	Taurolithocholate 3-sulfate levels	MR Egger	17	-0.144623	0.0953931	0.15029
RA	Taurolithocholate 3-sulfate levels	Weighted median	17	-0.0676462	0.0638738	0.289572
RA	Taurolithocholate 3-sulfate levels	Inverse variance weighted	17	-0.0347328	0.0466278	0.456336
RA	Taurolithocholate 3-sulfate levels	Simple mode	17	-0.0384979	0.091278	0.678808
RA	Taurolithocholate 3-sulfate levels	Weighted mode	17	-0.0611905	0.0715221	0.404879
RA	S-adenosylhomocysteine (SAH) levels	MR Egger	22	-0.0174863	0.0986359	0.861071
RA	S-adenosylhomocysteine (SAH) levels	Weighted median	22	0	0.059837	1
RA	S-adenosylhomocysteine (SAH) levels	Inverse variance weighted	22	-0.0409521	0.0436928	0.348617
RA	S-adenosylhomocysteine (SAH) levels	Simple mode	22	0.0351301	0.103075	0.736625
RA	S-adenosylhomocysteine (SAH) levels	Weighted mode	22	0.0839146	0.140444	0.556567
RA	Gamma-glutamyl-alpha-lysine levels	MR Egger	25	0.118085	0.109396	0.291589
RA	Gamma-glutamyl-alpha-lysine levels	Weighted median	25	0	0.0603149	1
RA	Gamma-glutamyl-alpha-lysine levels	Inverse variance weighted	25	-0.00712153	0.0437048	0.870561
RA	Gamma-glutamyl-alpha-lysine levels	Simple mode	25	-0.0249108	0.101475	0.808166
RA	Gamma-glutamyl-alpha-lysine levels	Weighted mode	25	-0.0117726	0.0930766	0.900403
RA	Serine levels	MR Egger	35	-0.104525	0.10202	0.313024
RA	Serine levels	Weighted median	35	0	0.0540465	1
RA	Serine levels	Inverse variance weighted	35	-0.044924	0.0386773	0.245436
RA	Serine levels	Simple mode	35	-0.00451574	0.120072	0.97022
RA	Serine levels	Weighted mode	35	-0.0674296	0.0735453	0.365682
RA	Pipecolate levels	MR Egger	18	0.217356	0.174169	0.230003
RA	Pipecolate levels	Weighted median	18	-0.0450125	0.0746447	0.546493
RA	Pipecolate levels	Inverse variance weighted	18	-0.0453298	0.0544835	0.405414
RA	Pipecolate levels	Simple mode	18	-0.151381	0.13445	0.275841
RA	Pipecolate levels	Weighted mode	18	-0.118888	0.124733	0.353877
RA	Adenosine 5'-diphosphate (ADP) to phosphate ratio	MR Egger	15	-0.315244	0.147939	0.0527626
RA	Adenosine 5'-diphosphate (ADP) to phosphate ratio	Weighted median	15	-0.00982142	0.0678369	0.884885
RA	Adenosine 5'-diphosphate (ADP) to phosphate ratio	Inverse variance weighted	15	0.0517097	0.0478743	0.280092
RA	Adenosine 5'-diphosphate (ADP) to phosphate ratio	Simple mode	15	-0.046268	0.120211	0.706101
RA	Adenosine 5'-diphosphate (ADP) to phosphate ratio	Weighted mode	15	-0.0669159	0.112307	0.560799
RA	Isoursodeoxycholate levels	MR Egger	13	-0.0719464	0.180826	0.698334
RA	Isoursodeoxycholate levels	Weighted median	13	-0.00149834	0.0728535	0.983592
RA	Isoursodeoxycholate levels	Inverse variance weighted	13	-0.0505429	0.0571674	0.376631
RA	Isoursodeoxycholate levels	Simple mode	13	-0.118165	0.111523	0.310208
RA	Isoursodeoxycholate levels	Weighted mode	13	0.00839945	0.0938422	0.930156
RA	Etiocholanolone glucuronide levels	MR Egger	20	-0.0306763	0.0508981	0.554227
RA	Etiocholanolone glucuronide levels	Weighted median	20	-0.0127125	0.0448967	0.777062
RA	Etiocholanolone glucuronide levels	Inverse variance weighted	20	-0.017173	0.0346823	0.620493
RA	Etiocholanolone glucuronide levels	Simple mode	20	-0.00349301	0.0874272	0.968547
RA	Etiocholanolone glucuronide levels	Weighted mode	20	-0.017266	0.0435511	0.696188
RA	Lactosyl-N-palmitoyl-sphingosine (d18:1/16:0) levels	MR Egger	17	-0.0281976	0.170378	0.87076
RA	Lactosyl-N-palmitoyl-sphingosine (d18:1/16:0) levels	Weighted median	17	0.126843	0.0738639	0.0859321
RA	Lactosyl-N-palmitoyl-sphingosine (d18:1/16:0) levels	Inverse variance weighted	17	0.0434073	0.0565242	0.442522
RA	Lactosyl-N-palmitoyl-sphingosine (d18:1/16:0) levels	Simple mode	17	0.1602	0.106124	0.15065
RA	Lactosyl-N-palmitoyl-sphingosine (d18:1/16:0) levels	Weighted mode	17	0.149765	0.104046	0.169311
RA	1-palmitoyl-2-linoleoyl-GPI (16:0/18:2) levels	MR Egger	17	-0.237865	0.150437	0.134694
RA	1-palmitoyl-2-linoleoyl-GPI (16:0/18:2) levels	Weighted median	17	-0.0972882	0.0743354	0.190611
RA	1-palmitoyl-2-linoleoyl-GPI (16:0/18:2) levels	Inverse variance weighted	17	-0.00619864	0.0589799	0.916298
RA	1-palmitoyl-2-linoleoyl-GPI (16:0/18:2) levels	Simple mode	17	0.141992	0.147301	0.349412
RA	1-palmitoyl-2-linoleoyl-GPI (16:0/18:2) levels	Weighted mode	17	-0.160089	0.0790229	0.0597903
RA	5alpha-pregnan-3beta,20alpha-diol disulfate levels	MR Egger	22	0.123388	0.0712436	0.0986853
RA	5alpha-pregnan-3beta,20alpha-diol disulfate levels	Weighted median	22	0.0596033	0.0499989	0.233225
RA	5alpha-pregnan-3beta,20alpha-diol disulfate levels	Inverse variance weighted	22	-0.0117683	0.0379797	0.756669
RA	5alpha-pregnan-3beta,20alpha-diol disulfate levels	Simple mode	22	-0.12399	0.107509	0.261748
RA	5alpha-pregnan-3beta,20alpha-diol disulfate levels	Weighted mode	22	0.0709362	0.0487134	0.160128
RA	X-24418 levels	MR Egger	24	0.0199573	0.0601349	0.743124
RA	X-24418 levels	Weighted median	24	0	0.0393755	1
RA	X-24418 levels	Inverse variance weighted	24	-0.00814551	0.0293536	0.781399
RA	X-24418 levels	Simple mode	24	-0.000975468	0.0576345	0.986642
RA	X-24418 levels	Weighted mode	24	-0.000975468	0.0428967	0.982054
RA	Oleate/vaccenate (18:1) levels	MR Egger	15	-0.19352	0.254082	0.459866
RA	Oleate/vaccenate (18:1) levels	Weighted median	15	0	0.089611	1
RA	Oleate/vaccenate (18:1) levels	Inverse variance weighted	15	-0.0432856	0.082834	0.601282
RA	Oleate/vaccenate (18:1) levels	Simple mode	15	-0.217716	0.15821	0.190398
RA	Oleate/vaccenate (18:1) levels	Weighted mode	15	0.0268054	0.143183	0.854181
RA	10-nonadecenoate (19:1n9) levels	MR Egger	10	-0.382774	0.241186	0.151163
RA	10-nonadecenoate (19:1n9) levels	Weighted median	10	-0.106167	0.110058	0.334723
RA	10-nonadecenoate (19:1n9) levels	Inverse variance weighted	10	-0.0691497	0.0923988	0.454229
RA	10-nonadecenoate (19:1n9) levels	Simple mode	10	-0.150314	0.198321	0.467871
RA	10-nonadecenoate (19:1n9) levels	Weighted mode	10	-0.157468	0.173162	0.38686
RA	3beta-hydroxy-5-cholestenoate levels	MR Egger	22	-0.0865273	0.071218	0.23853
RA	3beta-hydroxy-5-cholestenoate levels	Weighted median	22	-0.0427531	0.0484745	0.377793
RA	3beta-hydroxy-5-cholestenoate levels	Inverse variance weighted	22	-0.0200445	0.0413993	0.628262
RA	3beta-hydroxy-5-cholestenoate levels	Simple mode	22	0.145218	0.133905	0.290442
RA	3beta-hydroxy-5-cholestenoate levels	Weighted mode	22	-0.0891233	0.0467567	0.0704151
RA	Docosapentaenoate (n6 DPA; 22:5n6) levels	MR Egger	10	0.00186673	0.241323	0.994018
RA	Docosapentaenoate (n6 DPA; 22:5n6) levels	Weighted median	10	0	0.0779644	1
RA	Docosapentaenoate (n6 DPA; 22:5n6) levels	Inverse variance weighted	10	-0.0123332	0.0624934	0.843552
RA	Docosapentaenoate (n6 DPA; 22:5n6) levels	Simple mode	10	-0.000903606	0.110973	0.993681
RA	Docosapentaenoate (n6 DPA; 22:5n6) levels	Weighted mode	10	-0.00931169	0.0978709	0.926286
RA	Gamma-glutamylisoleucine levels	MR Egger	11	0.121407	0.199939	0.558713
RA	Gamma-glutamylisoleucine levels	Weighted median	11	0.0933979	0.109324	0.392929
RA	Gamma-glutamylisoleucine levels	Inverse variance weighted	11	0.0900707	0.0787017	0.252434
RA	Gamma-glutamylisoleucine levels	Simple mode	11	0.0500903	0.169852	0.774097
RA	Gamma-glutamylisoleucine levels	Weighted mode	11	0.130037	0.136397	0.362878
RA	N-acetyl-isoputreanine levels	MR Egger	27	-0.0169447	0.0595035	0.778167
RA	N-acetyl-isoputreanine levels	Weighted median	27	0	0.041886	1
RA	N-acetyl-isoputreanine levels	Inverse variance weighted	27	-0.0239656	0.029216	0.41205
RA	N-acetyl-isoputreanine levels	Simple mode	27	0.0634957	0.092695	0.499408
RA	N-acetyl-isoputreanine levels	Weighted mode	27	0.0121222	0.0472686	0.799619
RA	(2,4 or 2,5)-dimethylphenol sulfate levels	MR Egger	16	0.01272	0.144136	0.930928
RA	(2,4 or 2,5)-dimethylphenol sulfate levels	Weighted median	16	0.0346586	0.0639546	0.58787
RA	(2,4 or 2,5)-dimethylphenol sulfate levels	Inverse variance weighted	16	0.0147019	0.048538	0.76197
RA	(2,4 or 2,5)-dimethylphenol sulfate levels	Simple mode	16	0.105912	0.0979567	0.296681
RA	(2,4 or 2,5)-dimethylphenol sulfate levels	Weighted mode	16	0.0839203	0.0920791	0.376503
RA	X-17367 levels	MR Egger	13	-0.168947	0.0957742	0.105445
RA	X-17367 levels	Weighted median	13	-0.123703	0.0548011	0.0239884
RA	X-17367 levels	Inverse variance weighted	13	-0.0962729	0.0428297	0.0245884
RA	X-17367 levels	Simple mode	13	-0.00693077	0.0884304	0.938821
RA	X-17367 levels	Weighted mode	13	-0.159634	0.0726043	0.0482506
RA	N-acetylneuraminate levels	MR Egger	32	-0.0542688	0.1191	0.651916
RA	N-acetylneuraminate levels	Weighted median	32	0	0.0638253	1
RA	N-acetylneuraminate levels	Inverse variance weighted	32	-0.0171014	0.0447876	0.702585
RA	N-acetylneuraminate levels	Simple mode	32	0.0256333	0.116907	0.827883
RA	N-acetylneuraminate levels	Weighted mode	32	0.0208645	0.108342	0.848544
RA	X-16124 levels	MR Egger	15	0.0195418	0.143258	0.893587
RA	X-16124 levels	Weighted median	15	0.0455475	0.0731901	0.533733
RA	X-16124 levels	Inverse variance weighted	15	0.0170246	0.0497334	0.732113
RA	X-16124 levels	Simple mode	15	0.0913884	0.133342	0.504304
RA	X-16124 levels	Weighted mode	15	0.0523616	0.116315	0.659479
RA	Adenosine 5'-monophosphate (AMP) to isoleucine ratio	MR Egger	11	0.0487307	0.278254	0.864854
RA	Adenosine 5'-monophosphate (AMP) to isoleucine ratio	Weighted median	11	0	0.0929481	1
RA	Adenosine 5'-monophosphate (AMP) to isoleucine ratio	Inverse variance weighted	11	0.0154523	0.0700361	0.825378
RA	Adenosine 5'-monophosphate (AMP) to isoleucine ratio	Simple mode	11	0.00108038	0.124832	0.993265
RA	Adenosine 5'-monophosphate (AMP) to isoleucine ratio	Weighted mode	11	0.0145956	0.110589	0.897618
RA	1-linolenoyl-GPC (18:3) levels	MR Egger	23	0.00481239	0.205204	0.981511
RA	1-linolenoyl-GPC (18:3) levels	Weighted median	23	-0.0105165	0.0687278	0.878385
RA	1-linolenoyl-GPC (18:3) levels	Inverse variance weighted	23	-0.0150623	0.051393	0.769461
RA	1-linolenoyl-GPC (18:3) levels	Simple mode	23	-0.0236624	0.125494	0.85217
RA	1-linolenoyl-GPC (18:3) levels	Weighted mode	23	-0.0485691	0.0906366	0.597428
RA	X-18901 levels	MR Egger	20	-0.055836	0.141537	0.697848
RA	X-18901 levels	Weighted median	20	0.129941	0.0816108	0.111338
RA	X-18901 levels	Inverse variance weighted	20	0.102877	0.0567852	0.0700334
RA	X-18901 levels	Simple mode	20	0.0373312	0.140475	0.793294
RA	X-18901 levels	Weighted mode	20	0.125118	0.117219	0.299172
RA	Glutamate to cysteine ratio	MR Egger	23	0.204908	0.163008	0.22254
RA	Glutamate to cysteine ratio	Weighted median	23	-0.106058	0.0726698	0.144441
RA	Glutamate to cysteine ratio	Inverse variance weighted	23	-0.0835334	0.0495142	0.091592
RA	Glutamate to cysteine ratio	Simple mode	23	0.0812459	0.143059	0.57584
RA	Glutamate to cysteine ratio	Weighted mode	23	-0.199194	0.135086	0.154495
RA	X-12730 levels	MR Egger	11	-0.121506	0.167873	0.487579
RA	X-12730 levels	Weighted median	11	0	0.0983354	1
RA	X-12730 levels	Inverse variance weighted	11	0.0307954	0.0736778	0.675967
RA	X-12730 levels	Simple mode	11	-0.0508812	0.160315	0.75748
RA	X-12730 levels	Weighted mode	11	0.00119456	0.127589	0.992714
RA	Glucose to fructose ratio	MR Egger	11	0.395085	0.210697	0.0935292
RA	Glucose to fructose ratio	Weighted median	11	0	0.0983134	1
RA	Glucose to fructose ratio	Inverse variance weighted	11	-0.020166	0.09518	0.832207
RA	Glucose to fructose ratio	Simple mode	11	-0.0333706	0.182048	0.858221
RA	Glucose to fructose ratio	Weighted mode	11	0.0123676	0.153587	0.937409
RA	Isobutyrylcarnitine (c4) levels	MR Egger	21	0.0152408	0.0703941	0.8309
RA	Isobutyrylcarnitine (c4) levels	Weighted median	21	0.121071	0.0541451	0.0253484
RA	Isobutyrylcarnitine (c4) levels	Inverse variance weighted	21	0.05076	0.0388551	0.191419
RA	Isobutyrylcarnitine (c4) levels	Simple mode	21	0.148372	0.105427	0.174677
RA	Isobutyrylcarnitine (c4) levels	Weighted mode	21	0.130089	0.0763125	0.103738
RA	Hydroxyasparagine levels	MR Egger	18	0.032486	0.164971	0.84637
RA	Hydroxyasparagine levels	Weighted median	18	0.018353	0.083722	0.826483
RA	Hydroxyasparagine levels	Inverse variance weighted	18	0.00903821	0.059908	0.88008
RA	Hydroxyasparagine levels	Simple mode	18	0.0812028	0.143386	0.578574
RA	Hydroxyasparagine levels	Weighted mode	18	0.115205	0.127767	0.379826
RA	X-23593 levels	MR Egger	16	-0.115826	0.111374	0.315981
RA	X-23593 levels	Weighted median	16	-0.0452973	0.067221	0.500403
RA	X-23593 levels	Inverse variance weighted	16	0.00696139	0.0481196	0.884973
RA	X-23593 levels	Simple mode	16	-0.0672985	0.113235	0.561151
RA	X-23593 levels	Weighted mode	16	-0.0756901	0.0828488	0.375382
RA	2-aminophenol sulfate levels	MR Egger	24	-0.302172	0.144951	0.0489197
RA	2-aminophenol sulfate levels	Weighted median	24	-0.0262054	0.0726541	0.718333
RA	2-aminophenol sulfate levels	Inverse variance weighted	24	-0.0302843	0.0527058	0.565567
RA	2-aminophenol sulfate levels	Simple mode	24	-0.0693729	0.116279	0.556597
RA	2-aminophenol sulfate levels	Weighted mode	24	-0.0449957	0.114433	0.697788
RA	Phosphate to N-palmitoyl-sphingosine (d18:1 to 16:0) ratio	MR Egger	21	0.0293838	0.168607	0.863494
RA	Phosphate to N-palmitoyl-sphingosine (d18:1 to 16:0) ratio	Weighted median	21	-0.130703	0.0796982	0.10101
RA	Phosphate to N-palmitoyl-sphingosine (d18:1 to 16:0) ratio	Inverse variance weighted	21	-0.134709	0.0576564	0.0194695
RA	Phosphate to N-palmitoyl-sphingosine (d18:1 to 16:0) ratio	Simple mode	21	-0.0844958	0.15486	0.591357
RA	Phosphate to N-palmitoyl-sphingosine (d18:1 to 16:0) ratio	Weighted mode	21	-0.189109	0.129193	0.158799
RA	Glycosyl-N-(2-hydroxynervonoyl)-sphingosine (d18:1/24:1(2OH)) levels	MR Egger	25	-0.0839375	0.0662554	0.217878
RA	Glycosyl-N-(2-hydroxynervonoyl)-sphingosine (d18:1/24:1(2OH)) levels	Weighted median	25	-0.0344341	0.0442529	0.436497
RA	Glycosyl-N-(2-hydroxynervonoyl)-sphingosine (d18:1/24:1(2OH)) levels	Inverse variance weighted	25	-0.0556797	0.0321761	0.0835462
RA	Glycosyl-N-(2-hydroxynervonoyl)-sphingosine (d18:1/24:1(2OH)) levels	Simple mode	25	-0.0299153	0.0740753	0.689899
RA	Glycosyl-N-(2-hydroxynervonoyl)-sphingosine (d18:1/24:1(2OH)) levels	Weighted mode	25	-0.0449525	0.0455832	0.333891
RA	3-hydroxyhexanoate levels	MR Egger	13	0.435544	0.22344	0.0772142
RA	3-hydroxyhexanoate levels	Weighted median	13	-0.0324216	0.0917703	0.723871
RA	3-hydroxyhexanoate levels	Inverse variance weighted	13	-0.0465771	0.0853334	0.585186
RA	3-hydroxyhexanoate levels	Simple mode	13	0.0308267	0.136487	0.825113
RA	3-hydroxyhexanoate levels	Weighted mode	13	-0.0166986	0.120548	0.892125
RA	Succinimide levels	MR Egger	11	0.0912562	0.145373	0.545771
RA	Succinimide levels	Weighted median	11	0.0167057	0.0709106	0.813753
RA	Succinimide levels	Inverse variance weighted	11	0.0395212	0.050714	0.435806
RA	Succinimide levels	Simple mode	11	0.0141209	0.11831	0.907358
RA	Succinimide levels	Weighted mode	11	0.0104044	0.106425	0.924052
RA	Glycine to serine ratio	MR Egger	25	-0.110394	0.0536611	0.0511745
RA	Glycine to serine ratio	Weighted median	25	-0.0878511	0.0420209	0.0365591
RA	Glycine to serine ratio	Inverse variance weighted	25	-0.0128233	0.0317159	0.68598
RA	Glycine to serine ratio	Simple mode	25	0.127193	0.107343	0.247651
RA	Glycine to serine ratio	Weighted mode	25	-0.0800458	0.0427631	0.0734652
RA	6-hydroxyindole sulfate levels	MR Egger	11	0.161132	0.163751	0.350824
RA	6-hydroxyindole sulfate levels	Weighted median	11	0.0846883	0.090164	0.347592
RA	6-hydroxyindole sulfate levels	Inverse variance weighted	11	0.0922156	0.0689605	0.181149
RA	6-hydroxyindole sulfate levels	Simple mode	11	0.120623	0.147608	0.432863
RA	6-hydroxyindole sulfate levels	Weighted mode	11	0.0563064	0.104881	0.603105
RA	1-stearoyl-2-docosahexaenoyl-gpc (18:0/22:6) levels	MR Egger	26	0.149447	0.0692696	0.0411966
RA	1-stearoyl-2-docosahexaenoyl-gpc (18:0/22:6) levels	Weighted median	26	0.165478	0.0425425	0.000100366
RA	1-stearoyl-2-docosahexaenoyl-gpc (18:0/22:6) levels	Inverse variance weighted	26	0.15898	0.0317501	5.52197e-07
RA	1-stearoyl-2-docosahexaenoyl-gpc (18:0/22:6) levels	Simple mode	26	0.210949	0.0872663	0.0232594
RA	1-stearoyl-2-docosahexaenoyl-gpc (18:0/22:6) levels	Weighted mode	26	0.182387	0.0402968	0.000127284
RA	Glycocholate levels	MR Egger	26	0.0720885	0.0831225	0.39439
RA	Glycocholate levels	Weighted median	26	0.0442006	0.0540158	0.413192
RA	Glycocholate levels	Inverse variance weighted	26	0.0239594	0.0372524	0.520118
RA	Glycocholate levels	Simple mode	26	0.103425	0.0884151	0.253127
RA	Glycocholate levels	Weighted mode	26	0.0536034	0.0603658	0.383018
RA	21-hydroxypregnenolone disulfate levels	MR Egger	29	-0.0349937	0.0923946	0.707841
RA	21-hydroxypregnenolone disulfate levels	Weighted median	29	0	0.0540288	1
RA	21-hydroxypregnenolone disulfate levels	Inverse variance weighted	29	0.0171993	0.0360003	0.632824
RA	21-hydroxypregnenolone disulfate levels	Simple mode	29	0.0478487	0.088277	0.592086
RA	21-hydroxypregnenolone disulfate levels	Weighted mode	29	0.00874174	0.0609846	0.887046
RA	Glycoursodeoxycholic acid sulfate (1) levels	MR Egger	20	-0.0601994	0.144776	0.682465
RA	Glycoursodeoxycholic acid sulfate (1) levels	Weighted median	20	-0.0425812	0.0653501	0.514668
RA	Glycoursodeoxycholic acid sulfate (1) levels	Inverse variance weighted	20	0.0335216	0.0480342	0.485258
RA	Glycoursodeoxycholic acid sulfate (1) levels	Simple mode	20	-0.0304651	0.124963	0.810004
RA	Glycoursodeoxycholic acid sulfate (1) levels	Weighted mode	20	-0.0372385	0.0853703	0.667608
RA	Adenosine 5'-diphosphate (ADP) to EDTA ratio	MR Egger	22	-0.104602	0.103122	0.322529
RA	Adenosine 5'-diphosphate (ADP) to EDTA ratio	Weighted median	22	-0.0463797	0.0558457	0.406257
RA	Adenosine 5'-diphosphate (ADP) to EDTA ratio	Inverse variance weighted	22	-0.0317122	0.0382735	0.407349
RA	Adenosine 5'-diphosphate (ADP) to EDTA ratio	Simple mode	22	-0.0389423	0.0966604	0.69111
RA	Adenosine 5'-diphosphate (ADP) to EDTA ratio	Weighted mode	22	-0.0618992	0.0957203	0.524853
RA	X-17654 levels	MR Egger	20	0.0207381	0.0756207	0.787023
RA	X-17654 levels	Weighted median	20	-0.069094	0.0564138	0.220661
RA	X-17654 levels	Inverse variance weighted	20	-0.0226591	0.0409967	0.580465
RA	X-17654 levels	Simple mode	20	-0.0398127	0.0859974	0.648657
RA	X-17654 levels	Weighted mode	20	-0.069193	0.0559394	0.231185
RA	Cholate levels	MR Egger	16	0.118746	0.368338	0.751926
RA	Cholate levels	Weighted median	16	0.0958468	0.100843	0.341881
RA	Cholate levels	Inverse variance weighted	16	0.0169444	0.093653	0.856425
RA	Cholate levels	Simple mode	16	0.0829784	0.17135	0.635194
RA	Cholate levels	Weighted mode	16	0.156619	0.131171	0.251018
RA	Arginine to citrulline ratio	MR Egger	30	-0.0765074	0.107321	0.481818
RA	Arginine to citrulline ratio	Weighted median	30	0.0142571	0.0617161	0.817306
RA	Arginine to citrulline ratio	Inverse variance weighted	30	0.0277952	0.0402437	0.489771
RA	Arginine to citrulline ratio	Simple mode	30	0.0826477	0.114559	0.476413
RA	Arginine to citrulline ratio	Weighted mode	30	0.0681807	0.103283	0.514377
RA	4-ethylphenylsulfate levels	MR Egger	11	-0.674215	0.479933	0.193639
RA	4-ethylphenylsulfate levels	Weighted median	11	0.193936	0.124164	0.118302
RA	4-ethylphenylsulfate levels	Inverse variance weighted	11	0.0701392	0.106792	0.511321
RA	4-ethylphenylsulfate levels	Simple mode	11	0.249734	0.266188	0.370255
RA	4-ethylphenylsulfate levels	Weighted mode	11	0.315066	0.235807	0.211119
RA	Hypotaurine to taurine ratio	MR Egger	17	0.302207	0.200535	0.152579
RA	Hypotaurine to taurine ratio	Weighted median	17	0	0.0860743	1
RA	Hypotaurine to taurine ratio	Inverse variance weighted	17	-0.0330683	0.0607647	0.586302
RA	Hypotaurine to taurine ratio	Simple mode	17	0.0158545	0.177806	0.930056
RA	Hypotaurine to taurine ratio	Weighted mode	17	0.0422173	0.141979	0.770025
RA	Mannose to trans-4-hydroxyproline ratio	MR Egger	17	-0.0512416	0.166053	0.761881
RA	Mannose to trans-4-hydroxyproline ratio	Weighted median	17	0.0452545	0.0641284	0.480383
RA	Mannose to trans-4-hydroxyproline ratio	Inverse variance weighted	17	-0.0241269	0.0553236	0.66276
RA	Mannose to trans-4-hydroxyproline ratio	Simple mode	17	-0.111226	0.134292	0.419718
RA	Mannose to trans-4-hydroxyproline ratio	Weighted mode	17	0.0488746	0.0675284	0.47966
RA	Aspartate to glutamate ratio	MR Egger	20	0.115534	0.149282	0.449019
RA	Aspartate to glutamate ratio	Weighted median	20	0	0.0698909	1
RA	Aspartate to glutamate ratio	Inverse variance weighted	20	0.0729419	0.0468692	0.11964
RA	Aspartate to glutamate ratio	Simple mode	20	-0.00232829	0.133203	0.986236
RA	Aspartate to glutamate ratio	Weighted mode	20	0.0183939	0.0739759	0.806302
RA	Adenosine 5'-monophosphate (AMP) to asparagine ratio	MR Egger	18	0.121063	0.18563	0.52355
RA	Adenosine 5'-monophosphate (AMP) to asparagine ratio	Weighted median	18	0	0.0760615	1
RA	Adenosine 5'-monophosphate (AMP) to asparagine ratio	Inverse variance weighted	18	-0.015832	0.060814	0.794606
RA	Adenosine 5'-monophosphate (AMP) to asparagine ratio	Simple mode	18	-0.0803181	0.122468	0.520711
RA	Adenosine 5'-monophosphate (AMP) to asparagine ratio	Weighted mode	18	-0.0105797	0.109069	0.923861
RA	Phosphate to glucose ratio	MR Egger	14	-0.0154698	0.214434	0.943677
RA	Phosphate to glucose ratio	Weighted median	14	-0.00995676	0.0860871	0.907923
RA	Phosphate to glucose ratio	Inverse variance weighted	14	0.00576674	0.0660647	0.930442
RA	Phosphate to glucose ratio	Simple mode	14	-0.0391537	0.118288	0.745918
RA	Phosphate to glucose ratio	Weighted mode	14	-0.0444834	0.0975919	0.656047
RA	Phosphate to N-acetylneuraminate ratio	MR Egger	21	0.0145998	0.134888	0.914943
RA	Phosphate to N-acetylneuraminate ratio	Weighted median	21	0	0.0672896	1
RA	Phosphate to N-acetylneuraminate ratio	Inverse variance weighted	21	0.00830441	0.052168	0.873522
RA	Phosphate to N-acetylneuraminate ratio	Simple mode	21	0.00842855	0.126094	0.94737
RA	Phosphate to N-acetylneuraminate ratio	Weighted mode	21	-0.000959285	0.102122	0.992598
RA	3-hydroxyisobutyrate to adenosine 5'-diphosphate (ADP) ratio	MR Egger	17	-0.105129	0.0952269	0.286996
RA	3-hydroxyisobutyrate to adenosine 5'-diphosphate (ADP) ratio	Weighted median	17	-0.0983412	0.0578889	0.0893582
RA	3-hydroxyisobutyrate to adenosine 5'-diphosphate (ADP) ratio	Inverse variance weighted	17	-0.0556189	0.041804	0.183364
RA	3-hydroxyisobutyrate to adenosine 5'-diphosphate (ADP) ratio	Simple mode	17	-0.0717211	0.0934793	0.454113
RA	3-hydroxyisobutyrate to adenosine 5'-diphosphate (ADP) ratio	Weighted mode	17	-0.109339	0.0773966	0.176898
RA	X-18779 levels	MR Egger	13	-0.384558	0.204051	0.0861627
RA	X-18779 levels	Weighted median	13	-0.0278574	0.100323	0.781259
RA	X-18779 levels	Inverse variance weighted	13	-0.0985281	0.0713638	0.167388
RA	X-18779 levels	Simple mode	13	-0.35315	0.159346	0.0467526
RA	X-18779 levels	Weighted mode	13	0.0200127	0.146521	0.893623
RA	Sphingadienine levels	MR Egger	14	0.202712	0.12899	0.142042
RA	Sphingadienine levels	Weighted median	14	0	0.0511209	1
RA	Sphingadienine levels	Inverse variance weighted	14	0.00369984	0.0364277	0.919101
RA	Sphingadienine levels	Simple mode	14	-0.0330019	0.0771702	0.675904
RA	Sphingadienine levels	Weighted mode	14	-0.00229744	0.0599853	0.97003
RA	Isovalerate (i5:0) levels	MR Egger	12	0.245507	0.137374	0.104211
RA	Isovalerate (i5:0) levels	Weighted median	12	0.0815481	0.0812764	0.315696
RA	Isovalerate (i5:0) levels	Inverse variance weighted	12	-0.00235244	0.0588156	0.968096
RA	Isovalerate (i5:0) levels	Simple mode	12	0.0924404	0.145717	0.5388
RA	Isovalerate (i5:0) levels	Weighted mode	12	0.0976127	0.140496	0.50161
RA	Methionine to phosphate ratio	MR Egger	7	-0.0737625	0.344918	0.839107
RA	Methionine to phosphate ratio	Weighted median	7	0.219985	0.130754	0.0924854
RA	Methionine to phosphate ratio	Inverse variance weighted	7	0.199811	0.0957023	0.0368121
RA	Methionine to phosphate ratio	Simple mode	7	-0.0655126	0.226788	0.782401
RA	Methionine to phosphate ratio	Weighted mode	7	0.38921	0.189025	0.0851691
RA	tryptophan to tyrosine ratio	MR Egger	16	-0.0838278	0.172523	0.634559
RA	tryptophan to tyrosine ratio	Weighted median	16	0	0.0791789	1
RA	tryptophan to tyrosine ratio	Inverse variance weighted	16	-0.110117	0.0578686	0.0570559
RA	tryptophan to tyrosine ratio	Simple mode	16	0.0222827	0.153714	0.886671
RA	tryptophan to tyrosine ratio	Weighted mode	16	0.0263382	0.151871	0.864636
RA	Hydroquinone sulfate levels	MR Egger	9	1.63182	1.34549	0.264537
RA	Hydroquinone sulfate levels	Weighted median	9	0	0.109181	1
RA	Hydroquinone sulfate levels	Inverse variance weighted	9	-0.0264971	0.126989	0.834716
RA	Hydroquinone sulfate levels	Simple mode	9	-0.100498	0.186841	0.605295
RA	Hydroquinone sulfate levels	Weighted mode	9	-0.0360912	0.183988	0.849376
RA	Dibutyl sulfosuccinate levels	MR Egger	23	-0.110961	0.164161	0.506461
RA	Dibutyl sulfosuccinate levels	Weighted median	23	0	0.0746652	1
RA	Dibutyl sulfosuccinate levels	Inverse variance weighted	23	0.0161968	0.0542819	0.76541
RA	Dibutyl sulfosuccinate levels	Simple mode	23	-0.0210951	0.152451	0.891205
RA	Dibutyl sulfosuccinate levels	Weighted mode	23	0.0434314	0.123306	0.728022
RA	Sulfate of piperine metabolite C16H19NO3 (2) levels	MR Egger	20	0.25469	0.245672	0.313598
RA	Sulfate of piperine metabolite C16H19NO3 (2) levels	Weighted median	20	0.0518318	0.0867252	0.55007
RA	Sulfate of piperine metabolite C16H19NO3 (2) levels	Inverse variance weighted	20	0.0413106	0.0688468	0.548482
RA	Sulfate of piperine metabolite C16H19NO3 (2) levels	Simple mode	20	0.142006	0.178387	0.435833
RA	Sulfate of piperine metabolite C16H19NO3 (2) levels	Weighted mode	20	0.107783	0.156242	0.498631
RA	Glucuronate levels	MR Egger	13	-0.0642437	0.185408	0.735505
RA	Glucuronate levels	Weighted median	13	-0.0243619	0.0906473	0.788118
RA	Glucuronate levels	Inverse variance weighted	13	0.0143128	0.0743531	0.847352
RA	Glucuronate levels	Simple mode	13	0.146893	0.15866	0.372776
RA	Glucuronate levels	Weighted mode	13	-0.0812215	0.0989114	0.427571
RA	Glycerophosphorylcholine (GPC) levels	MR Egger	24	-0.198081	0.155128	0.214954
RA	Glycerophosphorylcholine (GPC) levels	Weighted median	24	0.046344	0.0780369	0.552597
RA	Glycerophosphorylcholine (GPC) levels	Inverse variance weighted	24	0.00476718	0.0579467	0.934433
RA	Glycerophosphorylcholine (GPC) levels	Simple mode	24	0.0969619	0.138602	0.491209
RA	Glycerophosphorylcholine (GPC) levels	Weighted mode	24	0.0536482	0.146487	0.717538
RA	Hippurate levels	MR Egger	15	-0.176437	0.198111	0.389331
RA	Hippurate levels	Weighted median	15	0.0991342	0.0882434	0.26126
RA	Hippurate levels	Inverse variance weighted	15	0.0567159	0.0691766	0.412289
RA	Hippurate levels	Simple mode	15	0.0789473	0.130734	0.555586
RA	Hippurate levels	Weighted mode	15	0.0878601	0.136835	0.531191
RA	Mannose to N-acetylglucosamine to N-acetylgalactosamine ratio	MR Egger	22	0.0474587	0.078845	0.553988
RA	Mannose to N-acetylglucosamine to N-acetylgalactosamine ratio	Weighted median	22	0.0523855	0.042662	0.219477
RA	Mannose to N-acetylglucosamine to N-acetylgalactosamine ratio	Inverse variance weighted	22	0.0333784	0.032722	0.307701
RA	Mannose to N-acetylglucosamine to N-acetylgalactosamine ratio	Simple mode	22	-0.0905144	0.089912	0.325539
RA	Mannose to N-acetylglucosamine to N-acetylgalactosamine ratio	Weighted mode	22	0.0430025	0.0389946	0.2826
RA	Sphingosine to phosphate ratio	MR Egger	14	0.15867	0.197487	0.437343
RA	Sphingosine to phosphate ratio	Weighted median	14	0	0.0710441	1
RA	Sphingosine to phosphate ratio	Inverse variance weighted	14	0.0235167	0.0509869	0.644633
RA	Sphingosine to phosphate ratio	Simple mode	14	0.0979777	0.105678	0.370751
RA	Sphingosine to phosphate ratio	Weighted mode	14	0.0129178	0.0740544	0.86421
RA	Glyco-beta-muricholate levels	MR Egger	19	0.126082	0.065447	0.0709326
RA	Glyco-beta-muricholate levels	Weighted median	19	0.104812	0.0537207	0.0510499
RA	Glyco-beta-muricholate levels	Inverse variance weighted	19	0.088822	0.0421812	0.0352283
RA	Glyco-beta-muricholate levels	Simple mode	19	0.104686	0.0936321	0.278244
RA	Glyco-beta-muricholate levels	Weighted mode	19	0.109198	0.0524138	0.0517458
RA	Salicylate levels	MR Egger	14	-0.020851	0.144863	0.88794
RA	Salicylate levels	Weighted median	14	0	0.0967074	1
RA	Salicylate levels	Inverse variance weighted	14	0.00562803	0.0683907	0.934414
RA	Salicylate levels	Simple mode	14	0.0338487	0.164223	0.839895
RA	Salicylate levels	Weighted mode	14	-0.00398233	0.155443	0.97995
RA	3-Hydroxybutyrate levels	MR Egger	10	0.265574	0.36395	0.486387
RA	3-Hydroxybutyrate levels	Weighted median	10	0	0.0992789	1
RA	3-Hydroxybutyrate levels	Inverse variance weighted	10	0.0286795	0.0794099	0.717982
RA	3-Hydroxybutyrate levels	Simple mode	10	-0.00935965	0.165836	0.956225
RA	3-Hydroxybutyrate levels	Weighted mode	10	-0.0691034	0.14462	0.644165
RA	Palmitate (16:0) levels	MR Egger	17	-0.208486	0.148644	0.181096
RA	Palmitate (16:0) levels	Weighted median	17	0.0672243	0.0784248	0.391344
RA	Palmitate (16:0) levels	Inverse variance weighted	17	0.00388263	0.0548747	0.943593
RA	Palmitate (16:0) levels	Simple mode	17	0.121563	0.123623	0.340079
RA	Palmitate (16:0) levels	Weighted mode	17	0.0999257	0.101888	0.341319
RA	Bilirubin degradation product,C17H20N2O5 (1) levels	MR Egger	14	-0.0348652	0.0644069	0.598188
RA	Bilirubin degradation product,C17H20N2O5 (1) levels	Weighted median	14	-0.0361832	0.0389834	0.353319
RA	Bilirubin degradation product,C17H20N2O5 (1) levels	Inverse variance weighted	14	-0.0369673	0.0374418	0.323482
RA	Bilirubin degradation product,C17H20N2O5 (1) levels	Simple mode	14	-0.106781	0.0995306	0.302854
RA	Bilirubin degradation product,C17H20N2O5 (1) levels	Weighted mode	14	-0.0380406	0.0391524	0.348979
RA	3-methyl catechol sulfate (2) levels	MR Egger	21	-0.0979037	0.111946	0.392734
RA	3-methyl catechol sulfate (2) levels	Weighted median	21	-0.106559	0.0800108	0.182922
RA	3-methyl catechol sulfate (2) levels	Inverse variance weighted	21	-0.0682384	0.0515418	0.185522
RA	3-methyl catechol sulfate (2) levels	Simple mode	21	-0.160789	0.137215	0.255046
RA	3-methyl catechol sulfate (2) levels	Weighted mode	21	-0.134099	0.102016	0.203556
RA	N-palmitoyl-sphingadienine (d18:2/16:0) levels	MR Egger	15	0.244827	0.305108	0.436731
RA	N-palmitoyl-sphingadienine (d18:2/16:0) levels	Weighted median	15	-0.0712094	0.0983318	0.468958
RA	N-palmitoyl-sphingadienine (d18:2/16:0) levels	Inverse variance weighted	15	-0.0402096	0.0755868	0.594749
RA	N-palmitoyl-sphingadienine (d18:2/16:0) levels	Simple mode	15	0.171835	0.184973	0.368644
RA	N-palmitoyl-sphingadienine (d18:2/16:0) levels	Weighted mode	15	-0.0520368	0.149029	0.732156
RA	Arachidonate (20:4n6) to oleate to vaccenate (18:1) ratio	MR Egger	16	0.0985869	0.0460643	0.0504281
RA	Arachidonate (20:4n6) to oleate to vaccenate (18:1) ratio	Weighted median	16	0.088005	0.0327453	0.00719764
RA	Arachidonate (20:4n6) to oleate to vaccenate (18:1) ratio	Inverse variance weighted	16	0.0737038	0.0290372	0.0111407
RA	Arachidonate (20:4n6) to oleate to vaccenate (18:1) ratio	Simple mode	16	0.0758219	0.0816262	0.367653
RA	Arachidonate (20:4n6) to oleate to vaccenate (18:1) ratio	Weighted mode	16	0.0864324	0.0339828	0.0224896
RA	4-methylcatechol sulfate levels	MR Egger	16	-0.593858	0.349233	0.111141
RA	4-methylcatechol sulfate levels	Weighted median	16	-0.168624	0.0896014	0.0598444
RA	4-methylcatechol sulfate levels	Inverse variance weighted	16	-0.104505	0.0849529	0.218639
RA	4-methylcatechol sulfate levels	Simple mode	16	-0.200224	0.174016	0.267907
RA	4-methylcatechol sulfate levels	Weighted mode	16	-0.279177	0.125073	0.0412815
RA	3-methoxycatechol sulfate (1) levels	MR Egger	18	-0.00354365	0.153015	0.98181
RA	3-methoxycatechol sulfate (1) levels	Weighted median	18	0.095477	0.0758083	0.207866
RA	3-methoxycatechol sulfate (1) levels	Inverse variance weighted	18	0.0535512	0.0536253	0.31798
RA	3-methoxycatechol sulfate (1) levels	Simple mode	18	-0.141674	0.147164	0.349198
RA	3-methoxycatechol sulfate (1) levels	Weighted mode	18	0.112637	0.113536	0.335071
RA	N6,N6-dimethyllysine levels	MR Egger	21	0.000304315	0.0326258	0.992655
RA	N6,N6-dimethyllysine levels	Weighted median	21	0.0174176	0.0243525	0.47447
RA	N6,N6-dimethyllysine levels	Inverse variance weighted	21	0.0267144	0.0215667	0.215461
RA	N6,N6-dimethyllysine levels	Simple mode	21	0.139922	0.0793368	0.0930643
RA	N6,N6-dimethyllysine levels	Weighted mode	21	0.0218893	0.0234466	0.361656
RA	Hexanoylcarnitine levels (Biocrates platform)	MR Egger	17	0.102413	0.0617929	0.11821
RA	Hexanoylcarnitine levels (Biocrates platform)	Weighted median	17	0.0489839	0.0445042	0.271046
RA	Hexanoylcarnitine levels (Biocrates platform)	Inverse variance weighted	17	0.0167587	0.0398773	0.674298
RA	Hexanoylcarnitine levels (Biocrates platform)	Simple mode	17	-0.0680802	0.127663	0.60117
RA	Hexanoylcarnitine levels (Biocrates platform)	Weighted mode	17	0.0535773	0.0430158	0.230871
RA	N-palmitoyl-sphinganine (d18:0/16:0) levels	MR Egger	18	0.0911464	0.171799	0.603024
RA	N-palmitoyl-sphinganine (d18:0/16:0) levels	Weighted median	18	0.0232383	0.0765563	0.761475
RA	N-palmitoyl-sphinganine (d18:0/16:0) levels	Inverse variance weighted	18	-0.0250589	0.0548447	0.647738
RA	N-palmitoyl-sphinganine (d18:0/16:0) levels	Simple mode	18	0.0781844	0.12179	0.529462
RA	N-palmitoyl-sphinganine (d18:0/16:0) levels	Weighted mode	18	0.0755932	0.11485	0.519232
RA	Acetoacetate levels	MR Egger	8	0.174413	0.173092	0.352523
RA	Acetoacetate levels	Weighted median	8	-0.06992	0.0853543	0.412687
RA	Acetoacetate levels	Inverse variance weighted	8	0.0234507	0.0664567	0.724185
RA	Acetoacetate levels	Simple mode	8	-0.103439	0.133164	0.462724
RA	Acetoacetate levels	Weighted mode	8	-0.0989937	0.10753	0.387879
RA	Hexadecanedioate (C16-DC) levels	MR Egger	18	-0.0462791	0.0482273	0.351532
RA	Hexadecanedioate (C16-DC) levels	Weighted median	18	-0.0417135	0.0384071	0.27744
RA	Hexadecanedioate (C16-DC) levels	Inverse variance weighted	18	-0.0260224	0.0320355	0.41662
RA	Hexadecanedioate (C16-DC) levels	Simple mode	18	-0.0174425	0.0909606	0.850203
RA	Hexadecanedioate (C16-DC) levels	Weighted mode	18	-0.0483888	0.0352118	0.18722
RA	Glycochenodeoxycholate levels	MR Egger	26	0.216785	0.170791	0.216507
RA	Glycochenodeoxycholate levels	Weighted median	26	0	0.0747302	1
RA	Glycochenodeoxycholate levels	Inverse variance weighted	26	-0.0293766	0.0583206	0.614467
RA	Glycochenodeoxycholate levels	Simple mode	26	-0.035395	0.155796	0.822125
RA	Glycochenodeoxycholate levels	Weighted mode	26	-0.0588848	0.134614	0.665553
RA	4-acetamidobutanoate levels	MR Egger	16	0.304687	0.0690472	0.000590177
RA	4-acetamidobutanoate levels	Weighted median	16	0.224955	0.0469565	1.66195e-06
RA	4-acetamidobutanoate levels	Inverse variance weighted	16	0.171434	0.0420309	4.52765e-05
RA	4-acetamidobutanoate levels	Simple mode	16	0.059003	0.141434	0.682459
RA	4-acetamidobutanoate levels	Weighted mode	16	0.216452	0.0507719	0.000680367
RA	Citraconate/glutaconate levels	MR Egger	16	-0.0237935	0.114974	0.839031
RA	Citraconate/glutaconate levels	Weighted median	16	0.132937	0.0747218	0.0752236
RA	Citraconate/glutaconate levels	Inverse variance weighted	16	0.180803	0.0526227	0.000590746
RA	Citraconate/glutaconate levels	Simple mode	16	0.204674	0.129931	0.136052
RA	Citraconate/glutaconate levels	Weighted mode	16	0.14912	0.0999328	0.156377
RA	Fructose to maltose ratio	MR Egger	17	0.13689	0.123225	0.284104
RA	Fructose to maltose ratio	Weighted median	17	-0.106909	0.069358	0.123217
RA	Fructose to maltose ratio	Inverse variance weighted	17	-0.0182025	0.0514548	0.723521
RA	Fructose to maltose ratio	Simple mode	17	-0.149751	0.124597	0.246897
RA	Fructose to maltose ratio	Weighted mode	17	-0.134693	0.107568	0.228503
RA	Glycosyl-N-tricosanoyl-sphingadienine (d18:2/23:0) levels	MR Egger	18	0.0778465	0.181371	0.673493
RA	Glycosyl-N-tricosanoyl-sphingadienine (d18:2/23:0) levels	Weighted median	18	-0.0313028	0.0762049	0.68124
RA	Glycosyl-N-tricosanoyl-sphingadienine (d18:2/23:0) levels	Inverse variance weighted	18	-0.0367937	0.0581533	0.526928
RA	Glycosyl-N-tricosanoyl-sphingadienine (d18:2/23:0) levels	Simple mode	18	-0.0504474	0.161487	0.758541
RA	Glycosyl-N-tricosanoyl-sphingadienine (d18:2/23:0) levels	Weighted mode	18	-0.150131	0.135846	0.284488
RA	Gamma-glutamylhistidine levels	MR Egger	13	-0.301478	0.264822	0.279133
RA	Gamma-glutamylhistidine levels	Weighted median	13	0.121779	0.104466	0.243724
RA	Gamma-glutamylhistidine levels	Inverse variance weighted	13	0.124529	0.097485	0.201455
RA	Gamma-glutamylhistidine levels	Simple mode	13	0.135465	0.207206	0.525592
RA	Gamma-glutamylhistidine levels	Weighted mode	13	0.284851	0.194669	0.169092
RA	Phosphate to alanine ratio	MR Egger	16	0.0961167	0.121636	0.442591
RA	Phosphate to alanine ratio	Weighted median	16	0	0.0680957	1
RA	Phosphate to alanine ratio	Inverse variance weighted	16	-0.0252675	0.0486058	0.603172
RA	Phosphate to alanine ratio	Simple mode	16	0.0593283	0.11264	0.606098
RA	Phosphate to alanine ratio	Weighted mode	16	0.0424836	0.0989779	0.673862
RA	Methionine sulfone levels	MR Egger	28	0.0274638	0.0755438	0.719135
RA	Methionine sulfone levels	Weighted median	28	0	0.0519661	1
RA	Methionine sulfone levels	Inverse variance weighted	28	-0.0431943	0.0407972	0.28971
RA	Methionine sulfone levels	Simple mode	28	-0.0598871	0.097301	0.54339
RA	Methionine sulfone levels	Weighted mode	28	-0.00430495	0.0456829	0.925618
RA	1-oleoyl-GPE (18:1) levels	MR Egger	21	0.122283	0.244445	0.622645
RA	1-oleoyl-GPE (18:1) levels	Weighted median	21	0	0.070745	1
RA	1-oleoyl-GPE (18:1) levels	Inverse variance weighted	21	-0.00436296	0.0511047	0.931965
RA	1-oleoyl-GPE (18:1) levels	Simple mode	21	0.00977198	0.121131	0.936504
RA	1-oleoyl-GPE (18:1) levels	Weighted mode	21	-0.0272819	0.0937571	0.774059
RA	Phosphocholine levels	MR Egger	22	-0.0610873	0.113719	0.59707
RA	Phosphocholine levels	Weighted median	22	-0.00395915	0.0658447	0.952053
RA	Phosphocholine levels	Inverse variance weighted	22	0.00115981	0.0452886	0.979569
RA	Phosphocholine levels	Simple mode	22	-0.0535069	0.114792	0.645929
RA	Phosphocholine levels	Weighted mode	22	-0.0413435	0.110013	0.710832
RA	X-21383 levels	MR Egger	18	0.376268	0.16822	0.039891
RA	X-21383 levels	Weighted median	18	-0.0659065	0.0777985	0.396915
RA	X-21383 levels	Inverse variance weighted	18	-0.0359191	0.0581008	0.53643
RA	X-21383 levels	Simple mode	18	-0.0660735	0.1392	0.641066
RA	X-21383 levels	Weighted mode	18	-0.0849841	0.131483	0.526683
RA	2,2'-Methylenebis(6-tert-butyl-p-cresol) levels	MR Egger	13	-0.224281	0.203173	0.293203
RA	2,2'-Methylenebis(6-tert-butyl-p-cresol) levels	Weighted median	13	0	0.0803817	1
RA	2,2'-Methylenebis(6-tert-butyl-p-cresol) levels	Inverse variance weighted	13	0.0239568	0.0575403	0.677155
RA	2,2'-Methylenebis(6-tert-butyl-p-cresol) levels	Simple mode	13	0.0484322	0.127939	0.71163
RA	2,2'-Methylenebis(6-tert-butyl-p-cresol) levels	Weighted mode	13	0.0350435	0.107091	0.74913
RA	X-24456 levels	MR Egger	16	-0.0523615	0.210507	0.807174
RA	X-24456 levels	Weighted median	16	-0.118639	0.0726762	0.102589
RA	X-24456 levels	Inverse variance weighted	16	-0.0380558	0.0547808	0.487248
RA	X-24456 levels	Simple mode	16	0.0148839	0.115314	0.899015
RA	X-24456 levels	Weighted mode	16	-0.140907	0.112182	0.228306
RA	X-24243 levels	MR Egger	19	-0.107309	0.131545	0.42592
RA	X-24243 levels	Weighted median	19	0	0.0761851	1
RA	X-24243 levels	Inverse variance weighted	19	0.0237168	0.0552338	0.66764
RA	X-24243 levels	Simple mode	19	-0.0739682	0.10936	0.507403
RA	X-24243 levels	Weighted mode	19	-0.0447981	0.0963096	0.647404
RA	X-13553 levels	MR Egger	16	-0.171958	0.147534	0.263273
RA	X-13553 levels	Weighted median	16	-0.00393372	0.0830748	0.962233
RA	X-13553 levels	Inverse variance weighted	16	-0.0627055	0.0594587	0.291606
RA	X-13553 levels	Simple mode	16	0.00912421	0.134186	0.946686
RA	X-13553 levels	Weighted mode	16	0.00912421	0.121286	0.941027
RA	1-oleoyl-GPC (18:1) levels	MR Egger	13	0.423274	0.1942	0.0519037
RA	1-oleoyl-GPC (18:1) levels	Weighted median	13	0.201532	0.0961243	0.0360312
RA	1-oleoyl-GPC (18:1) levels	Inverse variance weighted	13	0.140155	0.0735537	0.0567171
RA	1-oleoyl-GPC (18:1) levels	Simple mode	13	0.133378	0.177595	0.467112
RA	1-oleoyl-GPC (18:1) levels	Weighted mode	13	0.252306	0.125036	0.0665344
RA	Trans 3,4-methyleneheptanoate levels	MR Egger	10	0.123007	0.173759	0.499098
RA	Trans 3,4-methyleneheptanoate levels	Weighted median	10	0	0.0718435	1
RA	Trans 3,4-methyleneheptanoate levels	Inverse variance weighted	10	-0.028657	0.0547324	0.600568
RA	Trans 3,4-methyleneheptanoate levels	Simple mode	10	8.09145e-05	0.106737	0.999412
RA	Trans 3,4-methyleneheptanoate levels	Weighted mode	10	-0.00301258	0.10096	0.976846
RA	4-hydroxyhippurate levels	MR Egger	11	0.333655	0.246088	0.208191
RA	4-hydroxyhippurate levels	Weighted median	11	0.0655519	0.107891	0.54347
RA	4-hydroxyhippurate levels	Inverse variance weighted	11	-0.0143965	0.081803	0.860302
RA	4-hydroxyhippurate levels	Simple mode	11	0.0815659	0.15162	0.602369
RA	4-hydroxyhippurate levels	Weighted mode	11	0.0815659	0.125105	0.529113
RA	3-phosphoglycerate to phosphate ratio	MR Egger	19	-0.0839616	0.130157	0.527486
RA	3-phosphoglycerate to phosphate ratio	Weighted median	19	0	0.076071	1
RA	3-phosphoglycerate to phosphate ratio	Inverse variance weighted	19	-0.0259446	0.0536246	0.628515
RA	3-phosphoglycerate to phosphate ratio	Simple mode	19	-0.0193776	0.12586	0.879353
RA	3-phosphoglycerate to phosphate ratio	Weighted mode	19	-0.00586884	0.0918479	0.949756
RA	Alpha-ketoglutarate to pyruvate ratio	MR Egger	11	0.161945	0.185981	0.406512
RA	Alpha-ketoglutarate to pyruvate ratio	Weighted median	11	-0.0537665	0.0846268	0.525209
RA	Alpha-ketoglutarate to pyruvate ratio	Inverse variance weighted	11	-0.0138751	0.0771781	0.857325
RA	Alpha-ketoglutarate to pyruvate ratio	Simple mode	11	-0.0126565	0.13832	0.928901
RA	Alpha-ketoglutarate to pyruvate ratio	Weighted mode	11	-0.0560069	0.0819753	0.509989
RA	X-12714 levels	MR Egger	9	0.149705	0.1379	0.313619
RA	X-12714 levels	Weighted median	9	0.127605	0.0681583	0.0611808
RA	X-12714 levels	Inverse variance weighted	9	0.0787837	0.0551635	0.153238
RA	X-12714 levels	Simple mode	9	0.0627907	0.121938	0.620516
RA	X-12714 levels	Weighted mode	9	0.128862	0.0651394	0.0832732
RA	Dihydrocaffeate sulfate (2) levels	MR Egger	21	0.0240883	0.168748	0.887993
RA	Dihydrocaffeate sulfate (2) levels	Weighted median	21	-0.0654564	0.0581319	0.260166
RA	Dihydrocaffeate sulfate (2) levels	Inverse variance weighted	21	-0.0455091	0.0505623	0.368088
RA	Dihydrocaffeate sulfate (2) levels	Simple mode	21	-0.106983	0.0978519	0.287251
RA	Dihydrocaffeate sulfate (2) levels	Weighted mode	21	-0.0845702	0.080164	0.30402
RA	Adenosine 5'-diphosphate (ADP) to citrate ratio	MR Egger	19	-0.0507495	0.140817	0.722991
RA	Adenosine 5'-diphosphate (ADP) to citrate ratio	Weighted median	19	-0.0603213	0.0558319	0.27996
RA	Adenosine 5'-diphosphate (ADP) to citrate ratio	Inverse variance weighted	19	-0.0240314	0.0412497	0.560173
RA	Adenosine 5'-diphosphate (ADP) to citrate ratio	Simple mode	19	-0.0642882	0.0903226	0.485735
RA	Adenosine 5'-diphosphate (ADP) to citrate ratio	Weighted mode	19	-0.0741573	0.0890217	0.415748
RA	N,N,N-trimethyl-5-aminovalerate levels	MR Egger	32	0.0843761	0.112968	0.460935
RA	N,N,N-trimethyl-5-aminovalerate levels	Weighted median	32	0.0651299	0.0536113	0.224422
RA	N,N,N-trimethyl-5-aminovalerate levels	Inverse variance weighted	32	0.0711257	0.0407943	0.0812431
RA	N,N,N-trimethyl-5-aminovalerate levels	Simple mode	32	0.206054	0.110261	0.0711284
RA	N,N,N-trimethyl-5-aminovalerate levels	Weighted mode	32	0.0632186	0.0518542	0.231979
RA	2'-o-methylcytidine levels	MR Egger	14	-0.0274594	0.0326162	0.416309
RA	2'-o-methylcytidine levels	Weighted median	14	-0.0152357	0.0236757	0.51989
RA	2'-o-methylcytidine levels	Inverse variance weighted	14	-0.00423512	0.0245885	0.863249
RA	2'-o-methylcytidine levels	Simple mode	14	0.0682746	0.111642	0.551381
RA	2'-o-methylcytidine levels	Weighted mode	14	-0.0177493	0.0246183	0.483687
RA	Adenosine 3',5'-cyclic monophosphate (camp) levels	MR Egger	23	-0.0334687	0.118701	0.780736
RA	Adenosine 3',5'-cyclic monophosphate (camp) levels	Weighted median	23	0.027979	0.0575412	0.626795
RA	Adenosine 3',5'-cyclic monophosphate (camp) levels	Inverse variance weighted	23	0.0028487	0.046262	0.950899
RA	Adenosine 3',5'-cyclic monophosphate (camp) levels	Simple mode	23	0.0919281	0.112988	0.424588
RA	Adenosine 3',5'-cyclic monophosphate (camp) levels	Weighted mode	23	0.0217274	0.0644131	0.739078
RA	Dopamine 4-sulfate levels	MR Egger	15	-0.0690638	0.101136	0.506671
RA	Dopamine 4-sulfate levels	Weighted median	15	-0.0745843	0.0792664	0.34674
RA	Dopamine 4-sulfate levels	Inverse variance weighted	15	-0.0354254	0.0524561	0.499464
RA	Dopamine 4-sulfate levels	Simple mode	15	-0.0707434	0.124417	0.578636
RA	Dopamine 4-sulfate levels	Weighted mode	15	-0.0820042	0.0818424	0.333359
RA	Sphingomyelin (d18:1/20:2,d18:2/20:1,d16:1/22:2) levels	MR Egger	19	-0.272816	0.107746	0.0214891
RA	Sphingomyelin (d18:1/20:2,d18:2/20:1,d16:1/22:2) levels	Weighted median	19	-0.144936	0.0588827	0.0138384
RA	Sphingomyelin (d18:1/20:2,d18:2/20:1,d16:1/22:2) levels	Inverse variance weighted	19	-0.0599759	0.0464164	0.196313
RA	Sphingomyelin (d18:1/20:2,d18:2/20:1,d16:1/22:2) levels	Simple mode	19	0.0315468	0.12835	0.808627
RA	Sphingomyelin (d18:1/20:2,d18:2/20:1,d16:1/22:2) levels	Weighted mode	19	-0.202439	0.0599631	0.00336525
RA	N-formylmethionine levels	MR Egger	16	0.298082	0.153563	0.0726512
RA	N-formylmethionine levels	Weighted median	16	0.167915	0.0814834	0.0393294
RA	N-formylmethionine levels	Inverse variance weighted	16	0.051556	0.0565679	0.362085
RA	N-formylmethionine levels	Simple mode	16	-0.118472	0.172763	0.503333
RA	N-formylmethionine levels	Weighted mode	16	0.225622	0.0872893	0.0207177
RA	1-stearoyl-GPG (18:0) levels	MR Egger	24	0.0783422	0.100679	0.444775
RA	1-stearoyl-GPG (18:0) levels	Weighted median	24	-0.0273072	0.0566888	0.630016
RA	1-stearoyl-GPG (18:0) levels	Inverse variance weighted	24	-0.0345656	0.0380794	0.364024
RA	1-stearoyl-GPG (18:0) levels	Simple mode	24	-0.0169071	0.0981492	0.86474
RA	1-stearoyl-GPG (18:0) levels	Weighted mode	24	-0.0802731	0.0787433	0.318604
RA	N-acetylcitrulline levels	MR Egger	13	0.0512962	0.0332329	0.150965
RA	N-acetylcitrulline levels	Weighted median	13	0	0.0259838	1
RA	N-acetylcitrulline levels	Inverse variance weighted	13	-0.0131042	0.026438	0.620137
RA	N-acetylcitrulline levels	Simple mode	13	-0.00247907	0.0661821	0.970736
RA	N-acetylcitrulline levels	Weighted mode	13	-0.00247907	0.0230293	0.916053
RA	Serine to alpha-ketobutyrate ratio	MR Egger	12	0.119885	0.21247	0.585021
RA	Serine to alpha-ketobutyrate ratio	Weighted median	12	0.0847389	0.078481	0.280259
RA	Serine to alpha-ketobutyrate ratio	Inverse variance weighted	12	0.072994	0.0582025	0.209792
RA	Serine to alpha-ketobutyrate ratio	Simple mode	12	0.0660772	0.121942	0.598708
RA	Serine to alpha-ketobutyrate ratio	Weighted mode	12	0.0865819	0.0865593	0.33868
RA	X-21310 levels	MR Egger	15	-0.0330132	0.157367	0.837088
RA	X-21310 levels	Weighted median	15	0	0.08508	1
RA	X-21310 levels	Inverse variance weighted	15	0.00527253	0.0615215	0.931703
RA	X-21310 levels	Simple mode	15	-0.0570442	0.134538	0.678009
RA	X-21310 levels	Weighted mode	15	0.0083767	0.116276	0.943588
RA	Glucose to N-palmitoyl-sphinganine (d18:0 to 16:0) ratio	MR Egger	19	-0.193412	0.150143	0.214938
RA	Glucose to N-palmitoyl-sphinganine (d18:0 to 16:0) ratio	Weighted median	19	-0.0187909	0.0752086	0.802703
RA	Glucose to N-palmitoyl-sphinganine (d18:0 to 16:0) ratio	Inverse variance weighted	19	-0.0116601	0.0547005	0.8312
RA	Glucose to N-palmitoyl-sphinganine (d18:0 to 16:0) ratio	Simple mode	19	-0.0717458	0.113979	0.536954
RA	Glucose to N-palmitoyl-sphinganine (d18:0 to 16:0) ratio	Weighted mode	19	-0.0547165	0.0982893	0.584596
RA	Isobutyrylglycine levels	MR Egger	25	0.0125952	0.0972374	0.898064
RA	Isobutyrylglycine levels	Weighted median	25	0	0.0615266	1
RA	Isobutyrylglycine levels	Inverse variance weighted	25	0.00381458	0.0430944	0.929466
RA	Isobutyrylglycine levels	Simple mode	25	0.0461359	0.112614	0.685673
RA	Isobutyrylglycine levels	Weighted mode	25	-0.00530842	0.0835278	0.949853
RA	Benzoate levels	MR Egger	10	0.0707199	0.128237	0.596369
RA	Benzoate levels	Weighted median	10	0.192096	0.0926595	0.0381596
RA	Benzoate levels	Inverse variance weighted	10	0.200542	0.0642065	0.00178781
RA	Benzoate levels	Simple mode	10	0.164138	0.133679	0.250645
RA	Benzoate levels	Weighted mode	10	0.186342	0.0996608	0.094335
RA	2-hydroxyglutarate levels	MR Egger	21	0.0272938	0.183516	0.883336
RA	2-hydroxyglutarate levels	Weighted median	21	0.0551907	0.0690375	0.424041
RA	2-hydroxyglutarate levels	Inverse variance weighted	21	0.0584284	0.0567932	0.303577
RA	2-hydroxyglutarate levels	Simple mode	21	0.0420602	0.111479	0.709931
RA	2-hydroxyglutarate levels	Weighted mode	21	0.0256178	0.0910415	0.781305
RA	X-12026 levels	MR Egger	20	0.188078	0.150548	0.227561
RA	X-12026 levels	Weighted median	20	0	0.0739448	1
RA	X-12026 levels	Inverse variance weighted	20	-0.0152224	0.0561654	0.786369
RA	X-12026 levels	Simple mode	20	0.0265166	0.120915	0.828755
RA	X-12026 levels	Weighted mode	20	0.0429627	0.0990469	0.669347
RA	1-oleoyl-2-arachidonoyl-GPE (18:1/20:4) levels	MR Egger	21	-0.00596589	0.05612	0.916454
RA	1-oleoyl-2-arachidonoyl-GPE (18:1/20:4) levels	Weighted median	21	-0.0267506	0.0305804	0.381703
RA	1-oleoyl-2-arachidonoyl-GPE (18:1/20:4) levels	Inverse variance weighted	21	-0.00677115	0.0322066	0.83348
RA	1-oleoyl-2-arachidonoyl-GPE (18:1/20:4) levels	Simple mode	21	-0.067592	0.0884707	0.453785
RA	1-oleoyl-2-arachidonoyl-GPE (18:1/20:4) levels	Weighted mode	21	-0.0265179	0.0263917	0.327005
RA	N-lactoyl phenylalanine levels	MR Egger	12	0.00788298	0.285121	0.978487
RA	N-lactoyl phenylalanine levels	Weighted median	12	0	0.0978781	1
RA	N-lactoyl phenylalanine levels	Inverse variance weighted	12	-0.0876844	0.0823046	0.286711
RA	N-lactoyl phenylalanine levels	Simple mode	12	0.0693364	0.156929	0.667171
RA	N-lactoyl phenylalanine levels	Weighted mode	12	0.0104244	0.15691	0.948223
RA	P-cresol glucuronide levels	MR Egger	16	-0.141182	0.148461	0.357749
RA	P-cresol glucuronide levels	Weighted median	16	0.0794904	0.0779581	0.307892
RA	P-cresol glucuronide levels	Inverse variance weighted	16	0.044849	0.0584469	0.442876
RA	P-cresol glucuronide levels	Simple mode	16	0.136036	0.12733	0.302243
RA	P-cresol glucuronide levels	Weighted mode	16	0.103304	0.104596	0.338991
RA	Alpha-ketoglutarate to succinate ratio	MR Egger	15	-0.0107758	0.176591	0.95227
RA	Alpha-ketoglutarate to succinate ratio	Weighted median	15	0.0355685	0.0923152	0.70002
RA	Alpha-ketoglutarate to succinate ratio	Inverse variance weighted	15	-0.0143247	0.0715184	0.841251
RA	Alpha-ketoglutarate to succinate ratio	Simple mode	15	0.0685165	0.149677	0.654148
RA	Alpha-ketoglutarate to succinate ratio	Weighted mode	15	0.0847561	0.14407	0.565703
RA	3-hydroxypyridine glucuronide levels	MR Egger	17	-0.065326	0.166152	0.699725
RA	3-hydroxypyridine glucuronide levels	Weighted median	17	0	0.0639865	1
RA	3-hydroxypyridine glucuronide levels	Inverse variance weighted	17	0.0366393	0.0482253	0.447402
RA	3-hydroxypyridine glucuronide levels	Simple mode	17	-0.000338297	0.105964	0.997492
RA	3-hydroxypyridine glucuronide levels	Weighted mode	17	-0.0143986	0.0964439	0.883186
RA	Aspartate to phosphate ratio	MR Egger	15	-0.0625804	0.15098	0.68527
RA	Aspartate to phosphate ratio	Weighted median	15	-0.0506761	0.0627486	0.419318
RA	Aspartate to phosphate ratio	Inverse variance weighted	15	-0.0650026	0.0488899	0.18366
RA	Aspartate to phosphate ratio	Simple mode	15	-0.183963	0.130332	0.179937
RA	Aspartate to phosphate ratio	Weighted mode	15	-0.0191777	0.0708685	0.79064
RA	Adenosine 5'-diphosphate (ADP) to fructose ratio	MR Egger	20	-0.155639	0.119357	0.208673
RA	Adenosine 5'-diphosphate (ADP) to fructose ratio	Weighted median	20	-0.10078	0.0627308	0.108152
RA	Adenosine 5'-diphosphate (ADP) to fructose ratio	Inverse variance weighted	20	-0.0958928	0.0436255	0.0279428
RA	Adenosine 5'-diphosphate (ADP) to fructose ratio	Simple mode	20	-0.133775	0.107955	0.230372
RA	Adenosine 5'-diphosphate (ADP) to fructose ratio	Weighted mode	20	-0.116678	0.113617	0.317343
RA	Adenosine 5'-monophosphate (AMP) to cysteine ratio	MR Egger	21	-0.0100491	0.205305	0.961472
RA	Adenosine 5'-monophosphate (AMP) to cysteine ratio	Weighted median	21	-0.000877428	0.0846248	0.991727
RA	Adenosine 5'-monophosphate (AMP) to cysteine ratio	Inverse variance weighted	21	-0.00629712	0.0621206	0.919257
RA	Adenosine 5'-monophosphate (AMP) to cysteine ratio	Simple mode	21	-0.0826093	0.14394	0.572424
RA	Adenosine 5'-monophosphate (AMP) to cysteine ratio	Weighted mode	21	-0.108137	0.130023	0.415414
RA	X-11381 levels	MR Egger	20	-0.193394	0.102048	0.0742527
RA	X-11381 levels	Weighted median	20	0	0.0703133	1
RA	X-11381 levels	Inverse variance weighted	20	0.0467041	0.0520607	0.369661
RA	X-11381 levels	Simple mode	20	-0.0489071	0.133136	0.717419
RA	X-11381 levels	Weighted mode	20	-0.0643551	0.105153	0.547783
RA	3-hydroxydodecanedioate levels	MR Egger	16	0.0449797	0.145389	0.761592
RA	3-hydroxydodecanedioate levels	Weighted median	16	-0.0895455	0.0734228	0.222621
RA	3-hydroxydodecanedioate levels	Inverse variance weighted	16	-0.0502875	0.0556246	0.365967
RA	3-hydroxydodecanedioate levels	Simple mode	16	-0.106126	0.127798	0.419323
RA	3-hydroxydodecanedioate levels	Weighted mode	16	-0.0963586	0.10296	0.364158
RA	Arginine levels	MR Egger	20	0.0415478	0.174604	0.814604
RA	Arginine levels	Weighted median	20	0.0880318	0.072995	0.227819
RA	Arginine levels	Inverse variance weighted	20	0.0320012	0.0563851	0.570343
RA	Arginine levels	Simple mode	20	0.17268	0.143241	0.242804
RA	Arginine levels	Weighted mode	20	0.133551	0.101924	0.205713
RA	Linolenoylcarnitine (C18:3) levels	MR Egger	18	-0.0772788	0.176514	0.667379
RA	Linolenoylcarnitine (C18:3) levels	Weighted median	18	0	0.0795297	1
RA	Linolenoylcarnitine (C18:3) levels	Inverse variance weighted	18	-0.0318122	0.0617961	0.606698
RA	Linolenoylcarnitine (C18:3) levels	Simple mode	18	-0.0301699	0.13535	0.826268
RA	Linolenoylcarnitine (C18:3) levels	Weighted mode	18	-0.0379833	0.108961	0.731673
RA	3-carboxy-4-methyl-5-propyl-2-furanpropanoate (cmpf) levels	MR Egger	13	-0.314063	0.214927	0.171916
RA	3-carboxy-4-methyl-5-propyl-2-furanpropanoate (cmpf) levels	Weighted median	13	0.0830822	0.0875095	0.342413
RA	3-carboxy-4-methyl-5-propyl-2-furanpropanoate (cmpf) levels	Inverse variance weighted	13	-0.0414907	0.064423	0.519552
RA	3-carboxy-4-methyl-5-propyl-2-furanpropanoate (cmpf) levels	Simple mode	13	0.0570724	0.163476	0.73305
RA	3-carboxy-4-methyl-5-propyl-2-furanpropanoate (cmpf) levels	Weighted mode	13	0.0937477	0.0914449	0.3255
RA	Taurodeoxycholate levels	MR Egger	15	-0.0112011	0.154654	0.943365
RA	Taurodeoxycholate levels	Weighted median	15	-0.0560256	0.076463	0.463732
RA	Taurodeoxycholate levels	Inverse variance weighted	15	-0.0233998	0.0579953	0.686597
RA	Taurodeoxycholate levels	Simple mode	15	-0.0674066	0.112911	0.560046
RA	Taurodeoxycholate levels	Weighted mode	15	-0.0325069	0.10384	0.75886
RA	2-hydroxy-4-(methylthio)butanoic acid levels	MR Egger	21	0.0132492	0.117864	0.911677
RA	2-hydroxy-4-(methylthio)butanoic acid levels	Weighted median	21	-0.0259465	0.0577096	0.652995
RA	2-hydroxy-4-(methylthio)butanoic acid levels	Inverse variance weighted	21	-0.0231647	0.0434091	0.593593
RA	2-hydroxy-4-(methylthio)butanoic acid levels	Simple mode	21	-0.0429823	0.0935159	0.650742
RA	2-hydroxy-4-(methylthio)butanoic acid levels	Weighted mode	21	-0.0349156	0.0618282	0.578545
RA	3-methoxycatechol sulfate (2) levels	MR Egger	10	-0.350059	0.213845	0.140272
RA	3-methoxycatechol sulfate (2) levels	Weighted median	10	-0.0713657	0.0857822	0.405442
RA	3-methoxycatechol sulfate (2) levels	Inverse variance weighted	10	-0.0646784	0.0629124	0.303916
RA	3-methoxycatechol sulfate (2) levels	Simple mode	10	-0.0960617	0.129597	0.477444
RA	3-methoxycatechol sulfate (2) levels	Weighted mode	10	-0.0776783	0.13509	0.579372
RA	Adenosine 5'-diphosphate (ADP) to choline ratio	MR Egger	16	-0.193617	0.1456	0.20485
RA	Adenosine 5'-diphosphate (ADP) to choline ratio	Weighted median	16	-0.0812998	0.0594388	0.171378
RA	Adenosine 5'-diphosphate (ADP) to choline ratio	Inverse variance weighted	16	-0.0457436	0.0429776	0.287166
RA	Adenosine 5'-diphosphate (ADP) to choline ratio	Simple mode	16	-0.0868171	0.0808742	0.300021
RA	Adenosine 5'-diphosphate (ADP) to choline ratio	Weighted mode	16	-0.0831888	0.0780696	0.303469
RA	3-hydroxyisobutyrate to phosphate ratio	MR Egger	13	-0.00100456	0.181303	0.995678
RA	3-hydroxyisobutyrate to phosphate ratio	Weighted median	13	0.129658	0.0985236	0.18817
RA	3-hydroxyisobutyrate to phosphate ratio	Inverse variance weighted	13	0.0682991	0.0745043	0.359293
RA	3-hydroxyisobutyrate to phosphate ratio	Simple mode	13	0.141449	0.150453	0.365681
RA	3-hydroxyisobutyrate to phosphate ratio	Weighted mode	13	0.119232	0.139966	0.410967
RA	Phenylpyruvate to citrate ratio	MR Egger	23	-0.0306732	0.155226	0.845256
RA	Phenylpyruvate to citrate ratio	Weighted median	23	0.106353	0.0680393	0.118027
RA	Phenylpyruvate to citrate ratio	Inverse variance weighted	23	0.0475288	0.0476002	0.318036
RA	Phenylpyruvate to citrate ratio	Simple mode	23	0.114773	0.115113	0.329581
RA	Phenylpyruvate to citrate ratio	Weighted mode	23	0.13337	0.109284	0.235235
RA	Phosphate to threonine ratio	MR Egger	21	0.00509728	0.202102	0.980141
RA	Phosphate to threonine ratio	Weighted median	21	-0.0883915	0.074	0.23229
RA	Phosphate to threonine ratio	Inverse variance weighted	21	-0.0765437	0.0590391	0.194806
RA	Phosphate to threonine ratio	Simple mode	21	-0.166325	0.116702	0.169518
RA	Phosphate to threonine ratio	Weighted mode	21	-0.0727752	0.0805629	0.377101
RA	Pro-hydroxy-pro levels	MR Egger	22	-0.134543	0.151168	0.384035
RA	Pro-hydroxy-pro levels	Weighted median	22	0	0.0660187	1
RA	Pro-hydroxy-pro levels	Inverse variance weighted	22	-0.0335818	0.0474293	0.478921
RA	Pro-hydroxy-pro levels	Simple mode	22	-0.0105666	0.127009	0.934484
RA	Pro-hydroxy-pro levels	Weighted mode	22	-0.00520212	0.112236	0.963469
RA	3-aminoisobutyrate levels	MR Egger	23	-0.0246358	0.0241111	0.318521
RA	3-aminoisobutyrate levels	Weighted median	23	-0.0182911	0.0213689	0.392017
RA	3-aminoisobutyrate levels	Inverse variance weighted	23	-0.00936876	0.0196248	0.633082
RA	3-aminoisobutyrate levels	Simple mode	23	0.0117478	0.0821713	0.887617
RA	3-aminoisobutyrate levels	Weighted mode	23	-0.0181801	0.0219986	0.417438
RA	1-stearoyl-2-oleoyl-GPS (18:0/18:1) levels	MR Egger	12	0.0533274	0.283507	0.854561
RA	1-stearoyl-2-oleoyl-GPS (18:0/18:1) levels	Weighted median	12	-0.0234329	0.0700197	0.73788
RA	1-stearoyl-2-oleoyl-GPS (18:0/18:1) levels	Inverse variance weighted	12	-0.0527663	0.0789551	0.503937
RA	1-stearoyl-2-oleoyl-GPS (18:0/18:1) levels	Simple mode	12	-0.210253	0.169157	0.239729
RA	1-stearoyl-2-oleoyl-GPS (18:0/18:1) levels	Weighted mode	12	-0.0139805	0.076466	0.858256
RA	Bilirubin degradation product,C17H20N2O5 (2) levels	MR Egger	16	-0.0321842	0.0564933	0.57791
RA	Bilirubin degradation product,C17H20N2O5 (2) levels	Weighted median	16	-0.0325816	0.0369424	0.3778
RA	Bilirubin degradation product,C17H20N2O5 (2) levels	Inverse variance weighted	16	-0.0363381	0.0339702	0.284752
RA	Bilirubin degradation product,C17H20N2O5 (2) levels	Simple mode	16	-0.19365	0.10955	0.0974433
RA	Bilirubin degradation product,C17H20N2O5 (2) levels	Weighted mode	16	-0.0325949	0.0364998	0.385951
RA	2-butenoylglycine levels	MR Egger	23	-0.163353	0.107758	0.144448
RA	2-butenoylglycine levels	Weighted median	23	-0.0670165	0.0590869	0.25671
RA	2-butenoylglycine levels	Inverse variance weighted	23	-0.0231573	0.0402014	0.564593
RA	2-butenoylglycine levels	Simple mode	23	-0.00520137	0.120989	0.966097
RA	2-butenoylglycine levels	Weighted mode	23	-0.138309	0.0833196	0.111106
RA	X-12844 levels	MR Egger	28	0.0108658	0.081968	0.895561
RA	X-12844 levels	Weighted median	28	0.0189483	0.0462122	0.681786
RA	X-12844 levels	Inverse variance weighted	28	0.0107411	0.0331702	0.746076
RA	X-12844 levels	Simple mode	28	-0.00460062	0.0753845	0.951786
RA	X-12844 levels	Weighted mode	28	0.0281471	0.0506828	0.583222
RA	Glycine to phosphate ratio	MR Egger	21	-0.0809195	0.0502083	0.12352
RA	Glycine to phosphate ratio	Weighted median	21	-0.0610631	0.0387206	0.114791
RA	Glycine to phosphate ratio	Inverse variance weighted	21	-0.067054	0.0310545	0.0308319
RA	Glycine to phosphate ratio	Simple mode	21	0.0390948	0.0909452	0.671884
RA	Glycine to phosphate ratio	Weighted mode	21	-0.0658111	0.0381905	0.100274
RA	Sphingomyelin (d17:1/16:0,d18:1/15:0,d16:1/17:0) levels	MR Egger	24	0.115203	0.0841429	0.184773
RA	Sphingomyelin (d17:1/16:0,d18:1/15:0,d16:1/17:0) levels	Weighted median	24	0.115069	0.0623001	0.0647456
RA	Sphingomyelin (d17:1/16:0,d18:1/15:0,d16:1/17:0) levels	Inverse variance weighted	24	0.110905	0.0397911	0.00531682
RA	Sphingomyelin (d17:1/16:0,d18:1/15:0,d16:1/17:0) levels	Simple mode	24	0.133693	0.103189	0.20796
RA	Sphingomyelin (d17:1/16:0,d18:1/15:0,d16:1/17:0) levels	Weighted mode	24	0.122553	0.0655998	0.0745263
RA	N-delta-acetylornithine levels	MR Egger	19	-0.0461727	0.0411269	0.277176
RA	N-delta-acetylornithine levels	Weighted median	19	0	0.0259964	1
RA	N-delta-acetylornithine levels	Inverse variance weighted	19	0.0173769	0.031088	0.57619
RA	N-delta-acetylornithine levels	Simple mode	19	0.0196258	0.097813	0.843225
RA	N-delta-acetylornithine levels	Weighted mode	19	0.0013342	0.0239815	0.956246
RA	Adenosine 5'-diphosphate (ADP) to glycerol 3-phosphate ratio	MR Egger	20	-0.0986858	0.0891251	0.282754
RA	Adenosine 5'-diphosphate (ADP) to glycerol 3-phosphate ratio	Weighted median	20	0.0005955	0.0515244	0.990779
RA	Adenosine 5'-diphosphate (ADP) to glycerol 3-phosphate ratio	Inverse variance weighted	20	0.001356	0.0367786	0.970589
RA	Adenosine 5'-diphosphate (ADP) to glycerol 3-phosphate ratio	Simple mode	20	-0.081926	0.0901144	0.374669
RA	Adenosine 5'-diphosphate (ADP) to glycerol 3-phosphate ratio	Weighted mode	20	-0.00564258	0.0758529	0.941479
RA	1-dihomo-linolenylglycerol (20:3) levels	MR Egger	15	0.203202	0.156604	0.216994
RA	1-dihomo-linolenylglycerol (20:3) levels	Weighted median	15	0.0581737	0.0820768	0.478466
RA	1-dihomo-linolenylglycerol (20:3) levels	Inverse variance weighted	15	0.0544052	0.0560491	0.331713
RA	1-dihomo-linolenylglycerol (20:3) levels	Simple mode	15	-0.0783908	0.151163	0.612149
RA	1-dihomo-linolenylglycerol (20:3) levels	Weighted mode	15	0.0617358	0.125911	0.631508
RA	Adenosine 5'-diphosphate (ADP) to glutamine ratio	MR Egger	17	-0.270535	0.162878	0.117474
RA	Adenosine 5'-diphosphate (ADP) to glutamine ratio	Weighted median	17	0.0586913	0.0577494	0.309482
RA	Adenosine 5'-diphosphate (ADP) to glutamine ratio	Inverse variance weighted	17	0.0676667	0.0441229	0.12513
RA	Adenosine 5'-diphosphate (ADP) to glutamine ratio	Simple mode	17	-0.00539314	0.12186	0.965247
RA	Adenosine 5'-diphosphate (ADP) to glutamine ratio	Weighted mode	17	-0.00749852	0.107474	0.945241
RA	Uridine to pseudouridine ratio	MR Egger	20	-0.316339	0.196042	0.124003
RA	Uridine to pseudouridine ratio	Weighted median	20	-0.131855	0.0756403	0.0813014
RA	Uridine to pseudouridine ratio	Inverse variance weighted	20	-0.120688	0.0530379	0.0228753
RA	Uridine to pseudouridine ratio	Simple mode	20	-0.266079	0.133979	0.0616559
RA	Uridine to pseudouridine ratio	Weighted mode	20	-0.257295	0.121285	0.0472626
RA	X-21733 levels	MR Egger	24	0.281164	0.197665	0.168926
RA	X-21733 levels	Weighted median	24	0	0.0693966	1
RA	X-21733 levels	Inverse variance weighted	24	0.0574436	0.0576408	0.318968
RA	X-21733 levels	Simple mode	24	0.034961	0.116417	0.766639
RA	X-21733 levels	Weighted mode	24	0.034961	0.0968859	0.721507
RA	X-12680 levels	MR Egger	14	-0.180093	0.241563	0.4703
RA	X-12680 levels	Weighted median	14	0	0.0735203	1
RA	X-12680 levels	Inverse variance weighted	14	-0.00545633	0.0580622	0.92513
RA	X-12680 levels	Simple mode	14	-0.11079	0.115322	0.354233
RA	X-12680 levels	Weighted mode	14	0.0102131	0.106567	0.925111
RA	X-23641 levels	MR Egger	18	0.0945377	0.125163	0.461035
RA	X-23641 levels	Weighted median	18	0	0.0548544	1
RA	X-23641 levels	Inverse variance weighted	18	0.00457995	0.0402965	0.90951
RA	X-23641 levels	Simple mode	18	-0.0403028	0.0878709	0.652288
RA	X-23641 levels	Weighted mode	18	2.19278e-05	0.0621861	0.999723
RA	Glycosyl ceramide (d18:1/23:1,d17:1/24:1) levels	MR Egger	16	-0.141558	0.146948	0.351734
RA	Glycosyl ceramide (d18:1/23:1,d17:1/24:1) levels	Weighted median	16	0.0819003	0.0599147	0.171641
RA	Glycosyl ceramide (d18:1/23:1,d17:1/24:1) levels	Inverse variance weighted	16	0.0310396	0.042176	0.461759
RA	Glycosyl ceramide (d18:1/23:1,d17:1/24:1) levels	Simple mode	16	0.103488	0.108702	0.356169
RA	Glycosyl ceramide (d18:1/23:1,d17:1/24:1) levels	Weighted mode	16	0.101042	0.0821298	0.237541
RA	N2-acetyl,N6-methyllysine levels	MR Egger	23	-0.00976162	0.027027	0.721572
RA	N2-acetyl,N6-methyllysine levels	Weighted median	23	0.00864029	0.0192847	0.654125
RA	N2-acetyl,N6-methyllysine levels	Inverse variance weighted	23	0.0215386	0.0156128	0.167728
RA	N2-acetyl,N6-methyllysine levels	Simple mode	23	0.109096	0.0498518	0.0395461
RA	N2-acetyl,N6-methyllysine levels	Weighted mode	23	0.011197	0.0163246	0.499943
RA	2,4-di-tert-butylphenol levels	MR Egger	10	-0.078348	0.178788	0.672821
RA	2,4-di-tert-butylphenol levels	Weighted median	10	-0.0880585	0.0980014	0.368896
RA	2,4-di-tert-butylphenol levels	Inverse variance weighted	10	-0.0234047	0.0766362	0.760061
RA	2,4-di-tert-butylphenol levels	Simple mode	10	-0.131053	0.148685	0.401021
RA	2,4-di-tert-butylphenol levels	Weighted mode	10	-0.127952	0.145169	0.401028
RA	Adenosine 5'-diphosphate (ADP) to mannitol to sorbitol ratio	MR Egger	12	0.203244	0.174828	0.27201
RA	Adenosine 5'-diphosphate (ADP) to mannitol to sorbitol ratio	Weighted median	12	-0.0577229	0.0719845	0.422623
RA	Adenosine 5'-diphosphate (ADP) to mannitol to sorbitol ratio	Inverse variance weighted	12	-0.0606519	0.059353	0.306836
RA	Adenosine 5'-diphosphate (ADP) to mannitol to sorbitol ratio	Simple mode	12	0.0647429	0.14773	0.669686
RA	Adenosine 5'-diphosphate (ADP) to mannitol to sorbitol ratio	Weighted mode	12	-0.1637	0.123731	0.212667
RA	1-linoleoyl-GPI (18:2) levels	MR Egger	18	-0.347411	0.108827	0.00566828
RA	1-linoleoyl-GPI (18:2) levels	Weighted median	18	-0.138528	0.0560366	0.0134325
RA	1-linoleoyl-GPI (18:2) levels	Inverse variance weighted	18	-0.116399	0.0408689	0.00439802
RA	1-linoleoyl-GPI (18:2) levels	Simple mode	18	-0.0430621	0.128265	0.741183
RA	1-linoleoyl-GPI (18:2) levels	Weighted mode	18	-0.229801	0.0619592	0.00174377
RA	Urate levels	MR Egger	27	-0.0866477	0.0900759	0.345292
RA	Urate levels	Weighted median	27	-0.0553884	0.0529668	0.295691
RA	Urate levels	Inverse variance weighted	27	0.00394401	0.0474588	0.933769
RA	Urate levels	Simple mode	27	-0.0966587	0.101621	0.35028
RA	Urate levels	Weighted mode	27	-0.0743512	0.0518863	0.163784
RA	X-16964 levels	MR Egger	15	-0.161975	0.20347	0.440292
RA	X-16964 levels	Weighted median	15	0.0155636	0.0828813	0.851048
RA	X-16964 levels	Inverse variance weighted	15	0.0722938	0.0631196	0.252065
RA	X-16964 levels	Simple mode	15	0.00204451	0.148422	0.989204
RA	X-16964 levels	Weighted mode	15	-0.00361905	0.165408	0.982853
RA	Kynurenine levels	MR Egger	20	0.0456938	0.153944	0.770001
RA	Kynurenine levels	Weighted median	20	0.0955729	0.05809	0.0999171
RA	Kynurenine levels	Inverse variance weighted	20	0.0716858	0.0525104	0.172199
RA	Kynurenine levels	Simple mode	20	0.0682344	0.0914109	0.464528
RA	Kynurenine levels	Weighted mode	20	0.0924526	0.0658949	0.176739
RA	2-furoylcarnitine levels	MR Egger	14	-0.119966	0.161736	0.472514
RA	2-furoylcarnitine levels	Weighted median	14	-0.0606057	0.0739921	0.412739
RA	2-furoylcarnitine levels	Inverse variance weighted	14	-0.053193	0.0543857	0.32804
RA	2-furoylcarnitine levels	Simple mode	14	-0.0888801	0.115428	0.455061
RA	2-furoylcarnitine levels	Weighted mode	14	-0.0687139	0.101817	0.511578
RA	Spermidine to ergothioneine ratio	MR Egger	19	0.152247	0.239503	0.53345
RA	Spermidine to ergothioneine ratio	Weighted median	19	0.061467	0.0751755	0.413559
RA	Spermidine to ergothioneine ratio	Inverse variance weighted	19	0.0905737	0.0659944	0.169925
RA	Spermidine to ergothioneine ratio	Simple mode	19	0.0986666	0.147713	0.512633
RA	Spermidine to ergothioneine ratio	Weighted mode	19	0.123719	0.114233	0.293087
RA	1-palmitoyl-GPC (16:0) levels	MR Egger	21	-0.398978	0.183539	0.0425665
RA	1-palmitoyl-GPC (16:0) levels	Weighted median	21	-0.101757	0.0693806	0.142471
RA	1-palmitoyl-GPC (16:0) levels	Inverse variance weighted	21	-0.0566052	0.0608253	0.352051
RA	1-palmitoyl-GPC (16:0) levels	Simple mode	21	-0.0877684	0.111323	0.4397
RA	1-palmitoyl-GPC (16:0) levels	Weighted mode	21	-0.111044	0.0902228	0.232685
RA	3-ethylcatechol sulfate (2) levels	MR Egger	15	-0.110917	0.133644	0.421552
RA	3-ethylcatechol sulfate (2) levels	Weighted median	15	-0.0768643	0.0586213	0.18979
RA	3-ethylcatechol sulfate (2) levels	Inverse variance weighted	15	-0.0271739	0.0446066	0.542399
RA	3-ethylcatechol sulfate (2) levels	Simple mode	15	-0.0941618	0.0845426	0.284131
RA	3-ethylcatechol sulfate (2) levels	Weighted mode	15	-0.0663649	0.0699403	0.358775
RA	Iminodiacetate (IDA) levels	MR Egger	14	-0.352462	0.218654	0.132942
RA	Iminodiacetate (IDA) levels	Weighted median	14	0.12926	0.0943512	0.170689
RA	Iminodiacetate (IDA) levels	Inverse variance weighted	14	0.0377841	0.0816208	0.64342
RA	Iminodiacetate (IDA) levels	Simple mode	14	0.172862	0.147125	0.261094
RA	Iminodiacetate (IDA) levels	Weighted mode	14	0.172862	0.122747	0.182512
RA	Isoleucine to phosphate ratio	MR Egger	21	0.219919	0.189329	0.259794
RA	Isoleucine to phosphate ratio	Weighted median	21	0.0796752	0.0867555	0.358416
RA	Isoleucine to phosphate ratio	Inverse variance weighted	21	0.0471079	0.0712234	0.508349
RA	Isoleucine to phosphate ratio	Simple mode	21	0.286477	0.18389	0.134948
RA	Isoleucine to phosphate ratio	Weighted mode	21	0.153314	0.136823	0.275763
RA	Linoleoyl-arachidonoyl-glycerol (18:2/20:4) [1] levels	MR Egger	17	0.208105	0.0569578	0.00235212
RA	Linoleoyl-arachidonoyl-glycerol (18:2/20:4) [1] levels	Weighted median	17	0.124635	0.0468658	0.00782819
RA	Linoleoyl-arachidonoyl-glycerol (18:2/20:4) [1] levels	Inverse variance weighted	17	0.0248238	0.0415334	0.550051
RA	Linoleoyl-arachidonoyl-glycerol (18:2/20:4) [1] levels	Simple mode	17	-0.0397167	0.106618	0.714399
RA	Linoleoyl-arachidonoyl-glycerol (18:2/20:4) [1] levels	Weighted mode	17	0.111999	0.0423211	0.0175972
RA	Octadecenedioylcarnitine (C18:1-DC) levels	MR Egger	14	-0.0632202	0.0736213	0.40732
RA	Octadecenedioylcarnitine (C18:1-DC) levels	Weighted median	14	-0.0289581	0.0363235	0.425319
RA	Octadecenedioylcarnitine (C18:1-DC) levels	Inverse variance weighted	14	-0.0169635	0.0507079	0.737976
RA	Octadecenedioylcarnitine (C18:1-DC) levels	Simple mode	14	0.25301	0.125833	0.0655724
RA	Octadecenedioylcarnitine (C18:1-DC) levels	Weighted mode	14	-0.0279551	0.0355709	0.446015
RA	N-lactoyl valine levels	MR Egger	12	-0.256735	0.340463	0.468187
RA	N-lactoyl valine levels	Weighted median	12	0.0462062	0.108552	0.670356
RA	N-lactoyl valine levels	Inverse variance weighted	12	0.063908	0.0825898	0.439049
RA	N-lactoyl valine levels	Simple mode	12	-0.0366021	0.189523	0.850379
RA	N-lactoyl valine levels	Weighted mode	12	0.0369737	0.176807	0.838177
RA	Stearate (18:0) levels	MR Egger	13	-0.444342	0.237787	0.088515
RA	Stearate (18:0) levels	Weighted median	13	-0.027083	0.0865027	0.754213
RA	Stearate (18:0) levels	Inverse variance weighted	13	-0.0439651	0.0716729	0.539603
RA	Stearate (18:0) levels	Simple mode	13	-0.0901627	0.131842	0.50705
RA	Stearate (18:0) levels	Weighted mode	13	-0.0579424	0.0998118	0.572307
RA	Cytidine levels	MR Egger	22	0.105744	0.122926	0.399858
RA	Cytidine levels	Weighted median	22	0.0458576	0.0734247	0.532265
RA	Cytidine levels	Inverse variance weighted	22	0.0607477	0.0528413	0.250298
RA	Cytidine levels	Simple mode	22	0.0751697	0.133433	0.579161
RA	Cytidine levels	Weighted mode	22	0.0324479	0.103474	0.75693
RA	Indoleacetoylcarnitine levels	MR Egger	22	0.0380775	0.0782733	0.631923
RA	Indoleacetoylcarnitine levels	Weighted median	22	-0.0391785	0.0544586	0.471883
RA	Indoleacetoylcarnitine levels	Inverse variance weighted	22	-0.0343111	0.0394617	0.384586
RA	Indoleacetoylcarnitine levels	Simple mode	22	-0.0530068	0.0972055	0.591289
RA	Indoleacetoylcarnitine levels	Weighted mode	22	-0.0310924	0.065956	0.642208
RA	Stearoylcarnitine levels	MR Egger	18	0.0229667	0.192105	0.906326
RA	Stearoylcarnitine levels	Weighted median	18	0.0230128	0.0695994	0.740911
RA	Stearoylcarnitine levels	Inverse variance weighted	18	0.0567335	0.0594419	0.339862
RA	Stearoylcarnitine levels	Simple mode	18	0.00145644	0.123593	0.990735
RA	Stearoylcarnitine levels	Weighted mode	18	-0.00918605	0.0879541	0.918041
RA	X-26054 levels	MR Egger	27	0.00426813	0.0523371	0.935653
RA	X-26054 levels	Weighted median	27	0	0.0353266	1
RA	X-26054 levels	Inverse variance weighted	27	-0.0267008	0.0317532	0.400412
RA	X-26054 levels	Simple mode	27	-0.125482	0.0815409	0.135914
RA	X-26054 levels	Weighted mode	27	-0.021057	0.0309356	0.502096
RA	Sphingomyelin (d18:1/14:0,d16:1/16:0) levels	MR Egger	22	0.126962	0.0685332	0.0787627
RA	Sphingomyelin (d18:1/14:0,d16:1/16:0) levels	Weighted median	22	0.0907504	0.0526349	0.084681
RA	Sphingomyelin (d18:1/14:0,d16:1/16:0) levels	Inverse variance weighted	22	0.0639758	0.0405149	0.11432
RA	Sphingomyelin (d18:1/14:0,d16:1/16:0) levels	Simple mode	22	0.0270153	0.0989807	0.787569
RA	Sphingomyelin (d18:1/14:0,d16:1/16:0) levels	Weighted mode	22	0.0796566	0.0520713	0.141001
RA	Erythritol levels in elite athletes	MR Egger	19	0.00743976	0.126069	0.95363
RA	Erythritol levels in elite athletes	Weighted median	19	-0.0155475	0.0783366	0.842677
RA	Erythritol levels in elite athletes	Inverse variance weighted	19	-0.0832508	0.0567945	0.142696
RA	Erythritol levels in elite athletes	Simple mode	19	-0.00958588	0.123102	0.938791
RA	Erythritol levels in elite athletes	Weighted mode	19	-0.0156023	0.0974112	0.874531
RA	X-17690 levels	MR Egger	31	0.193476	0.168751	0.260954
RA	X-17690 levels	Weighted median	31	0	0.0599274	1
RA	X-17690 levels	Inverse variance weighted	31	0.101501	0.0567775	0.0738237
RA	X-17690 levels	Simple mode	31	0.015469	0.108311	0.887387
RA	X-17690 levels	Weighted mode	31	0.0474657	0.101852	0.644562
RA	Epiandrosterone sulfate levels	MR Egger	16	-0.0911701	0.0579307	0.13786
RA	Epiandrosterone sulfate levels	Weighted median	16	-0.0742591	0.0380193	0.0507965
RA	Epiandrosterone sulfate levels	Inverse variance weighted	16	-0.100944	0.0454117	0.0262253
RA	Epiandrosterone sulfate levels	Simple mode	16	-0.138841	0.0938432	0.1597
RA	Epiandrosterone sulfate levels	Weighted mode	16	-0.082002	0.0381428	0.0482867
RA	X-12216 levels	MR Egger	19	-0.178465	0.192062	0.36579
RA	X-12216 levels	Weighted median	19	0.0877529	0.0786717	0.264665
RA	X-12216 levels	Inverse variance weighted	19	0.0493168	0.0549009	0.369033
RA	X-12216 levels	Simple mode	19	0.130506	0.155527	0.412407
RA	X-12216 levels	Weighted mode	19	0.1716	0.138838	0.232357
RA	Galactonate levels	MR Egger	11	-0.181359	0.190374	0.365652
RA	Galactonate levels	Weighted median	11	0	0.07943	1
RA	Galactonate levels	Inverse variance weighted	11	-0.0997463	0.0583901	0.0875854
RA	Galactonate levels	Simple mode	11	-0.117481	0.124936	0.369208
RA	Galactonate levels	Weighted mode	11	-0.0181582	0.0900386	0.844217
RA	Adenosine 5'-diphosphate (ADP) to 5-oxoproline ratio	MR Egger	14	-0.105308	0.109844	0.356624
RA	Adenosine 5'-diphosphate (ADP) to 5-oxoproline ratio	Weighted median	14	-0.0535644	0.062362	0.390381
RA	Adenosine 5'-diphosphate (ADP) to 5-oxoproline ratio	Inverse variance weighted	14	-0.0451176	0.0459806	0.326479
RA	Adenosine 5'-diphosphate (ADP) to 5-oxoproline ratio	Simple mode	14	-0.0536535	0.10206	0.607945
RA	Adenosine 5'-diphosphate (ADP) to 5-oxoproline ratio	Weighted mode	14	-0.0466945	0.0812348	0.575234
RA	Bilirubin (Z,Z) to etiocholanolone glucuronide ratio	MR Egger	26	0.00639649	0.0513216	0.90185
RA	Bilirubin (Z,Z) to etiocholanolone glucuronide ratio	Weighted median	26	-0.00707749	0.0375593	0.850536
RA	Bilirubin (Z,Z) to etiocholanolone glucuronide ratio	Inverse variance weighted	26	0.00402283	0.0308786	0.896346
RA	Bilirubin (Z,Z) to etiocholanolone glucuronide ratio	Simple mode	26	-0.0188758	0.0830915	0.82214
RA	Bilirubin (Z,Z) to etiocholanolone glucuronide ratio	Weighted mode	26	-0.0109713	0.0355815	0.760375
RA	1-stearoyl-2-arachidonoyl-GPI (18:0/20:4) levels	MR Egger	19	0.107505	0.111621	0.348985
RA	1-stearoyl-2-arachidonoyl-GPI (18:0/20:4) levels	Weighted median	19	0.100753	0.0527336	0.0560557
RA	1-stearoyl-2-arachidonoyl-GPI (18:0/20:4) levels	Inverse variance weighted	19	0.027736	0.0486672	0.568738
RA	1-stearoyl-2-arachidonoyl-GPI (18:0/20:4) levels	Simple mode	19	0.0561184	0.119161	0.643335
RA	1-stearoyl-2-arachidonoyl-GPI (18:0/20:4) levels	Weighted mode	19	0.123945	0.0488509	0.0206444
RA	X-11843 levels	MR Egger	15	-0.051192	0.123151	0.684421
RA	X-11843 levels	Weighted median	15	0	0.0919707	1
RA	X-11843 levels	Inverse variance weighted	15	0.0156551	0.0671073	0.81554
RA	X-11843 levels	Simple mode	15	0.00224907	0.157956	0.988841
RA	X-11843 levels	Weighted mode	15	0.00592623	0.144782	0.967928
RA	Arachidonoylcarnitine (C20:4) levels	MR Egger	29	0.0201451	0.0447747	0.656359
RA	Arachidonoylcarnitine (C20:4) levels	Weighted median	29	0.128315	0.0392161	0.00106793
RA	Arachidonoylcarnitine (C20:4) levels	Inverse variance weighted	29	0.0856223	0.0249546	0.000601105
RA	Arachidonoylcarnitine (C20:4) levels	Simple mode	29	0.0447736	0.0864823	0.60872
RA	Arachidonoylcarnitine (C20:4) levels	Weighted mode	29	0.0912481	0.0351836	0.0149416
RA	Adenosine 5'-monophosphate (AMP) to proline ratio	MR Egger	15	0.232159	0.159221	0.168548
RA	Adenosine 5'-monophosphate (AMP) to proline ratio	Weighted median	15	-0.0227979	0.0840593	0.786228
RA	Adenosine 5'-monophosphate (AMP) to proline ratio	Inverse variance weighted	15	0.00677199	0.0590893	0.908757
RA	Adenosine 5'-monophosphate (AMP) to proline ratio	Simple mode	15	-0.0974139	0.140399	0.499138
RA	Adenosine 5'-monophosphate (AMP) to proline ratio	Weighted mode	15	-0.0910648	0.136599	0.515827
RA	Succinylcarnitine levels	MR Egger	24	-0.00181204	0.0641137	0.977707
RA	Succinylcarnitine levels	Weighted median	24	0	0.0464061	1
RA	Succinylcarnitine levels	Inverse variance weighted	24	0.000186186	0.0315097	0.995285
RA	Succinylcarnitine levels	Simple mode	24	-0.0435778	0.0816035	0.598452
RA	Succinylcarnitine levels	Weighted mode	24	-0.0327266	0.051937	0.534825
RA	X-18887 levels	MR Egger	12	-0.0467754	0.151945	0.764517
RA	X-18887 levels	Weighted median	12	0.0367631	0.0779662	0.637265
RA	X-18887 levels	Inverse variance weighted	12	0.0367434	0.0555898	0.508628
RA	X-18887 levels	Simple mode	12	0.103584	0.128109	0.435907
RA	X-18887 levels	Weighted mode	12	0.0208402	0.0972537	0.834244
RA	Threonate levels	MR Egger	18	-0.0893764	0.111053	0.432729
RA	Threonate levels	Weighted median	18	0.0467154	0.0769547	0.543817
RA	Threonate levels	Inverse variance weighted	18	0.0408101	0.0546918	0.455557
RA	Threonate levels	Simple mode	18	0.084046	0.134126	0.539234
RA	Threonate levels	Weighted mode	18	-0.0395799	0.0992457	0.695
RA	1-(1-enyl-palmitoyl)-2-oleoyl-gpc (p-16:0/18:1) levels	MR Egger	19	0.200938	0.223844	0.381899
RA	1-(1-enyl-palmitoyl)-2-oleoyl-gpc (p-16:0/18:1) levels	Weighted median	19	0	0.0664309	1
RA	1-(1-enyl-palmitoyl)-2-oleoyl-gpc (p-16:0/18:1) levels	Inverse variance weighted	19	0.0507923	0.0590136	0.389409
RA	1-(1-enyl-palmitoyl)-2-oleoyl-gpc (p-16:0/18:1) levels	Simple mode	19	-0.153513	0.130015	0.253077
RA	1-(1-enyl-palmitoyl)-2-oleoyl-gpc (p-16:0/18:1) levels	Weighted mode	19	0.0144196	0.087111	0.870371
RA	(N(1) + N(8))-acetylspermidine levels	MR Egger	25	0.0832246	0.0650725	0.213668
RA	(N(1) + N(8))-acetylspermidine levels	Weighted median	25	0.0201331	0.0481066	0.675575
RA	(N(1) + N(8))-acetylspermidine levels	Inverse variance weighted	25	0.035125	0.0344121	0.307388
RA	(N(1) + N(8))-acetylspermidine levels	Simple mode	25	0.0562259	0.0861692	0.520277
RA	(N(1) + N(8))-acetylspermidine levels	Weighted mode	25	0.0176642	0.0514357	0.73427
RA	Glucuronide of piperine metabolite C17H21NO3 (3) levels	MR Egger	12	-0.0599312	0.131137	0.657428
RA	Glucuronide of piperine metabolite C17H21NO3 (3) levels	Weighted median	12	0.0615178	0.0646896	0.34162
RA	Glucuronide of piperine metabolite C17H21NO3 (3) levels	Inverse variance weighted	12	0.0575933	0.048992	0.239768
RA	Glucuronide of piperine metabolite C17H21NO3 (3) levels	Simple mode	12	0.054277	0.0874415	0.547427
RA	Glucuronide of piperine metabolite C17H21NO3 (3) levels	Weighted mode	12	0.0639059	0.0663274	0.356004
RA	Leucine to N-palmitoyl-sphingosine (d18:1 to 16:0) ratio	MR Egger	17	0.00429461	0.436176	0.992274
RA	Leucine to N-palmitoyl-sphingosine (d18:1 to 16:0) ratio	Weighted median	17	-0.0715349	0.0904874	0.429206
RA	Leucine to N-palmitoyl-sphingosine (d18:1 to 16:0) ratio	Inverse variance weighted	17	0.020181	0.0765948	0.792183
RA	Leucine to N-palmitoyl-sphingosine (d18:1 to 16:0) ratio	Simple mode	17	-0.15951	0.189247	0.411726
RA	Leucine to N-palmitoyl-sphingosine (d18:1 to 16:0) ratio	Weighted mode	17	-0.151338	0.169569	0.385358
RA	1-(1-enyl-palmitoyl)-2-arachidonoyl-gpc (p-16:0/20:4) levels	MR Egger	30	0.0848889	0.0282433	0.00553966
RA	1-(1-enyl-palmitoyl)-2-arachidonoyl-gpc (p-16:0/20:4) levels	Weighted median	30	0.0668746	0.0217686	0.00212576
RA	1-(1-enyl-palmitoyl)-2-arachidonoyl-gpc (p-16:0/20:4) levels	Inverse variance weighted	30	0.0593221	0.0179588	0.000955778
RA	1-(1-enyl-palmitoyl)-2-arachidonoyl-gpc (p-16:0/20:4) levels	Simple mode	30	0.0278346	0.068061	0.68557
RA	1-(1-enyl-palmitoyl)-2-arachidonoyl-gpc (p-16:0/20:4) levels	Weighted mode	30	0.0726778	0.021218	0.00185409
RA	X-18345 levels	MR Egger	22	-0.0121014	0.124983	0.923829
RA	X-18345 levels	Weighted median	22	0	0.0689888	1
RA	X-18345 levels	Inverse variance weighted	22	0.0264282	0.0471143	0.57484
RA	X-18345 levels	Simple mode	22	-0.0874046	0.125807	0.494826
RA	X-18345 levels	Weighted mode	22	0.00205912	0.0974966	0.983349
RA	X-24947 levels	MR Egger	28	-0.135493	0.0695221	0.0621724
RA	X-24947 levels	Weighted median	28	-0.0972875	0.0494713	0.0492358
RA	X-24947 levels	Inverse variance weighted	28	-0.0558409	0.035881	0.119641
RA	X-24947 levels	Simple mode	28	-0.0558124	0.085641	0.520103
RA	X-24947 levels	Weighted mode	28	-0.0986219	0.0582075	0.101712
RA	Adenosine 5'-diphosphate (ADP) to gluconate ratio	MR Egger	20	-0.0643277	0.131175	0.629779
RA	Adenosine 5'-diphosphate (ADP) to gluconate ratio	Weighted median	20	-0.0528514	0.0627716	0.399808
RA	Adenosine 5'-diphosphate (ADP) to gluconate ratio	Inverse variance weighted	20	-0.0164285	0.0449694	0.714869
RA	Adenosine 5'-diphosphate (ADP) to gluconate ratio	Simple mode	20	-0.0861909	0.123076	0.492224
RA	Adenosine 5'-diphosphate (ADP) to gluconate ratio	Weighted mode	20	-0.049856	0.11422	0.6674
RA	Dihomo-linoleoylcarnitine (C20:2) levels	MR Egger	21	-0.206178	0.0882014	0.0305033
RA	Dihomo-linoleoylcarnitine (C20:2) levels	Weighted median	21	-0.00581531	0.050651	0.908595
RA	Dihomo-linoleoylcarnitine (C20:2) levels	Inverse variance weighted	21	-0.0139042	0.0355876	0.696017
RA	Dihomo-linoleoylcarnitine (C20:2) levels	Simple mode	21	0.0481427	0.0960378	0.62164
RA	Dihomo-linoleoylcarnitine (C20:2) levels	Weighted mode	21	-0.0831713	0.0534137	0.135127
RA	Histidine to trans-urocanate ratio	MR Egger	21	0.0390403	0.0917788	0.675343
RA	Histidine to trans-urocanate ratio	Weighted median	21	0	0.0516494	1
RA	Histidine to trans-urocanate ratio	Inverse variance weighted	21	-0.0255975	0.0476229	0.59092
RA	Histidine to trans-urocanate ratio	Simple mode	21	0.10676	0.131579	0.426703
RA	Histidine to trans-urocanate ratio	Weighted mode	21	0.000652233	0.0517708	0.990073
RA	Kynurenate levels	MR Egger	23	-0.172026	0.0973042	0.0916023
RA	Kynurenate levels	Weighted median	23	-0.10671	0.0596544	0.0736468
RA	Kynurenate levels	Inverse variance weighted	23	-0.0585083	0.0486376	0.228998
RA	Kynurenate levels	Simple mode	23	-0.0363017	0.0971484	0.712225
RA	Kynurenate levels	Weighted mode	23	-0.0886909	0.0603792	0.156015
RA	Cortisone levels	MR Egger	12	0.311516	0.229865	0.205169
RA	Cortisone levels	Weighted median	12	-0.064121	0.107962	0.552564
RA	Cortisone levels	Inverse variance weighted	12	-0.0516809	0.103335	0.616984
RA	Cortisone levels	Simple mode	12	0.0234305	0.159635	0.885964
RA	Cortisone levels	Weighted mode	12	-0.0293815	0.133405	0.829716
RA	Phosphate levels (UKB data field 30810)	MR Egger	21	-0.0819593	0.134449	0.549352
RA	Phosphate levels (UKB data field 30810)	Weighted median	21	-0.014225	0.0675067	0.833106
RA	Phosphate levels (UKB data field 30810)	Inverse variance weighted	21	-0.0339473	0.0503815	0.500436
RA	Phosphate levels (UKB data field 30810)	Simple mode	21	-0.0137562	0.116231	0.906969
RA	Phosphate levels (UKB data field 30810)	Weighted mode	21	-0.0656762	0.0854573	0.451154
RA	Spermidine to N-acetylputrescine ratio	MR Egger	13	-0.245132	0.0752028	0.00760426
RA	Spermidine to N-acetylputrescine ratio	Weighted median	13	-0.194673	0.0477196	4.51267e-05
RA	Spermidine to N-acetylputrescine ratio	Inverse variance weighted	13	-0.157664	0.0438919	0.000328035
RA	Spermidine to N-acetylputrescine ratio	Simple mode	13	-0.150255	0.140522	0.305988
RA	Spermidine to N-acetylputrescine ratio	Weighted mode	13	-0.205504	0.0476305	0.00100576
RA	Glucose-to-mannose ratio	MR Egger	23	-0.0762565	0.061528	0.228878
RA	Glucose-to-mannose ratio	Weighted median	23	-0.0346032	0.0354276	0.328704
RA	Glucose-to-mannose ratio	Inverse variance weighted	23	-0.0160158	0.0293426	0.585189
RA	Glucose-to-mannose ratio	Simple mode	23	-0.0444613	0.0847573	0.605127
RA	Glucose-to-mannose ratio	Weighted mode	23	-0.0357752	0.0326896	0.285622
RA	4-methylguaiacol sulfate levels	MR Egger	12	-0.0303714	0.242988	0.903007
RA	4-methylguaiacol sulfate levels	Weighted median	12	0.0681183	0.0862921	0.429883
RA	4-methylguaiacol sulfate levels	Inverse variance weighted	12	-0.0323675	0.0706882	0.64703
RA	4-methylguaiacol sulfate levels	Simple mode	12	0.0973298	0.120937	0.437986
RA	4-methylguaiacol sulfate levels	Weighted mode	12	0.0824914	0.0953447	0.405408
RA	Furaneol sulfate levels	MR Egger	9	-0.264463	0.148787	0.118736
RA	Furaneol sulfate levels	Weighted median	9	-0.129366	0.0615951	0.035706
RA	Furaneol sulfate levels	Inverse variance weighted	9	-0.142911	0.0508078	0.00491148
RA	Furaneol sulfate levels	Simple mode	9	-0.134071	0.102726	0.228134
RA	Furaneol sulfate levels	Weighted mode	9	-0.130076	0.0650624	0.0806095
RA	1-(1-enyl-palmitoyl)-2-palmitoyl-GPC (P-16:0/16:0) levels	MR Egger	28	0.00905052	0.0512014	0.861064
RA	1-(1-enyl-palmitoyl)-2-palmitoyl-GPC (P-16:0/16:0) levels	Weighted median	28	0	0.0285941	1
RA	1-(1-enyl-palmitoyl)-2-palmitoyl-GPC (P-16:0/16:0) levels	Inverse variance weighted	28	0.029086	0.0283197	0.304393
RA	1-(1-enyl-palmitoyl)-2-palmitoyl-GPC (P-16:0/16:0) levels	Simple mode	28	0.116705	0.100773	0.256965
RA	1-(1-enyl-palmitoyl)-2-palmitoyl-GPC (P-16:0/16:0) levels	Weighted mode	28	0.0077164	0.0297477	0.797298
RA	N-acetylkynurenine (2) levels	MR Egger	14	0.0160735	0.0661868	0.812223
RA	N-acetylkynurenine (2) levels	Weighted median	14	0	0.038858	1
RA	N-acetylkynurenine (2) levels	Inverse variance weighted	14	-0.0282874	0.036473	0.438002
RA	N-acetylkynurenine (2) levels	Simple mode	14	-0.16281	0.106049	0.148702
RA	N-acetylkynurenine (2) levels	Weighted mode	14	0.0112459	0.0398037	0.781982
RA	Linoleate (18:2n6) levels	MR Egger	10	-0.265982	0.351439	0.470846
RA	Linoleate (18:2n6) levels	Weighted median	10	-0.0718853	0.114126	0.528777
RA	Linoleate (18:2n6) levels	Inverse variance weighted	10	-0.105308	0.103013	0.306646
RA	Linoleate (18:2n6) levels	Simple mode	10	0.0132002	0.245578	0.958307
RA	Linoleate (18:2n6) levels	Weighted mode	10	0.107973	0.186673	0.577174
RA	3-methylglutaconate levels	MR Egger	18	-0.0487307	0.0471941	0.317166
RA	3-methylglutaconate levels	Weighted median	18	0.00586065	0.0423167	0.889849
RA	3-methylglutaconate levels	Inverse variance weighted	18	-0.0181729	0.0290438	0.531507
RA	3-methylglutaconate levels	Simple mode	18	-0.0786935	0.0796997	0.337305
RA	3-methylglutaconate levels	Weighted mode	18	-0.00522679	0.0403617	0.898483
RA	Cholesterol to taurocholate ratio	MR Egger	14	-0.177045	0.153963	0.272578
RA	Cholesterol to taurocholate ratio	Weighted median	14	0.122902	0.0835802	0.141434
RA	Cholesterol to taurocholate ratio	Inverse variance weighted	14	0.0596155	0.065978	0.366225
RA	Cholesterol to taurocholate ratio	Simple mode	14	0.121328	0.137301	0.392924
RA	Cholesterol to taurocholate ratio	Weighted mode	14	0.0536487	0.100043	0.600839
RA	Alpha-ketobutyrate to pyruvate ratio	MR Egger	10	-0.671586	0.303057	0.0575366
RA	Alpha-ketobutyrate to pyruvate ratio	Weighted median	10	0.0105049	0.107839	0.922398
RA	Alpha-ketobutyrate to pyruvate ratio	Inverse variance weighted	10	0.0168145	0.0785589	0.830518
RA	Alpha-ketobutyrate to pyruvate ratio	Simple mode	10	-0.0357577	0.183134	0.849531
RA	Alpha-ketobutyrate to pyruvate ratio	Weighted mode	10	0.0194129	0.163602	0.908152
RA	3,4-dihydroxybutyrate levels	MR Egger	20	-0.0106908	0.155666	0.946003
RA	3,4-dihydroxybutyrate levels	Weighted median	20	-0.0350175	0.051731	0.498459
RA	3,4-dihydroxybutyrate levels	Inverse variance weighted	20	-0.0335259	0.0525905	0.523806
RA	3,4-dihydroxybutyrate levels	Simple mode	20	0.00610676	0.0999946	0.951941
RA	3,4-dihydroxybutyrate levels	Weighted mode	20	-0.0405643	0.0528073	0.451836
RA	Behenoylcarnitine (C22) levels	MR Egger	22	0.00207534	0.14337	0.988594
RA	Behenoylcarnitine (C22) levels	Weighted median	22	-0.0315911	0.0614691	0.607298
RA	Behenoylcarnitine (C22) levels	Inverse variance weighted	22	0.0220077	0.0534701	0.68064
RA	Behenoylcarnitine (C22) levels	Simple mode	22	-0.0876015	0.0940003	0.361965
RA	Behenoylcarnitine (C22) levels	Weighted mode	22	-0.0536037	0.0682804	0.44119
RA	Propyl 4-hydroxybenzoate sulfate levels	MR Egger	25	-0.0415233	0.137696	0.765699
RA	Propyl 4-hydroxybenzoate sulfate levels	Weighted median	25	-0.0380561	0.0661264	0.56495
RA	Propyl 4-hydroxybenzoate sulfate levels	Inverse variance weighted	25	-0.0449106	0.0473719	0.343108
RA	Propyl 4-hydroxybenzoate sulfate levels	Simple mode	25	-0.0570607	0.124431	0.650666
RA	Propyl 4-hydroxybenzoate sulfate levels	Weighted mode	25	-0.0414179	0.113951	0.719435
RA	Phosphoethanolamine to choline ratio	MR Egger	14	-0.271397	0.244865	0.28943
RA	Phosphoethanolamine to choline ratio	Weighted median	14	-0.0878767	0.0889388	0.323124
RA	Phosphoethanolamine to choline ratio	Inverse variance weighted	14	-0.0960949	0.0639458	0.132902
RA	Phosphoethanolamine to choline ratio	Simple mode	14	-0.0567519	0.14697	0.705633
RA	Phosphoethanolamine to choline ratio	Weighted mode	14	-0.0164435	0.135967	0.90559
RA	X-11849 levels	MR Egger	26	-0.18717	0.15745	0.246166
RA	X-11849 levels	Weighted median	26	0.0334638	0.0677878	0.62155
RA	X-11849 levels	Inverse variance weighted	26	-0.0369903	0.0535138	0.489422
RA	X-11849 levels	Simple mode	26	0.0571601	0.140548	0.687694
RA	X-11849 levels	Weighted mode	26	0.0614257	0.107766	0.573772
RA	Pantothenate levels	MR Egger	20	-0.0664354	0.165195	0.6923
RA	Pantothenate levels	Weighted median	20	-0.0119301	0.0833382	0.886169
RA	Pantothenate levels	Inverse variance weighted	20	-0.0427561	0.0622307	0.492047
RA	Pantothenate levels	Simple mode	20	0.0364715	0.145192	0.804359
RA	Pantothenate levels	Weighted mode	20	-0.0803628	0.119892	0.510737
RA	Ornithine to glutamate ratio	MR Egger	14	0.32542	0.220193	0.165199
RA	Ornithine to glutamate ratio	Weighted median	14	0.0426105	0.114453	0.709672
RA	Ornithine to glutamate ratio	Inverse variance weighted	14	-0.0118025	0.100704	0.906701
RA	Ornithine to glutamate ratio	Simple mode	14	0.0116247	0.185752	0.951051
RA	Ornithine to glutamate ratio	Weighted mode	14	0.0650539	0.129703	0.624362
RA	1-oleoyl-2-docosahexaenoyl-GPC (18:1/22:6) levels	MR Egger	25	-0.0921591	0.174175	0.601794
RA	1-oleoyl-2-docosahexaenoyl-GPC (18:1/22:6) levels	Weighted median	25	0.133521	0.0716907	0.0625392
RA	1-oleoyl-2-docosahexaenoyl-GPC (18:1/22:6) levels	Inverse variance weighted	25	0.0759692	0.0583023	0.192567
RA	1-oleoyl-2-docosahexaenoyl-GPC (18:1/22:6) levels	Simple mode	25	0.201971	0.16088	0.221414
RA	1-oleoyl-2-docosahexaenoyl-GPC (18:1/22:6) levels	Weighted mode	25	0.250603	0.195833	0.21289
RA	X-24588 levels	MR Egger	27	0.0494883	0.0994255	0.623015
RA	X-24588 levels	Weighted median	27	-0.082925	0.0572826	0.147716
RA	X-24588 levels	Inverse variance weighted	27	-0.0648266	0.0478483	0.17547
RA	X-24588 levels	Simple mode	27	-0.127886	0.102806	0.224615
RA	X-24588 levels	Weighted mode	27	-0.100799	0.062077	0.116487
RA	3b-hydroxy-5-cholenoic acid levels	MR Egger	23	-0.215865	0.127018	0.103995
RA	3b-hydroxy-5-cholenoic acid levels	Weighted median	23	0	0.0668476	1
RA	3b-hydroxy-5-cholenoic acid levels	Inverse variance weighted	23	0.0148431	0.0500197	0.76666
RA	3b-hydroxy-5-cholenoic acid levels	Simple mode	23	-0.0740738	0.117696	0.535593
RA	3b-hydroxy-5-cholenoic acid levels	Weighted mode	23	-0.0740738	0.100573	0.469197
RA	Palmitoylcholine levels	MR Egger	16	0.104071	0.126649	0.425003
RA	Palmitoylcholine levels	Weighted median	16	0	0.0629623	1
RA	Palmitoylcholine levels	Inverse variance weighted	16	0.0427875	0.0493252	0.385691
RA	Palmitoylcholine levels	Simple mode	16	-0.058154	0.0920934	0.53724
RA	Palmitoylcholine levels	Weighted mode	16	-0.016038	0.083693	0.850603
RA	3-bromo-5-chloro-2,6-dihydroxybenzoic acid levels	MR Egger	21	0.0122537	0.0769465	0.875153
RA	3-bromo-5-chloro-2,6-dihydroxybenzoic acid levels	Weighted median	21	0	0.051875	1
RA	3-bromo-5-chloro-2,6-dihydroxybenzoic acid levels	Inverse variance weighted	21	-0.0197053	0.0427463	0.644811
RA	3-bromo-5-chloro-2,6-dihydroxybenzoic acid levels	Simple mode	21	-0.121724	0.134575	0.376494
RA	3-bromo-5-chloro-2,6-dihydroxybenzoic acid levels	Weighted mode	21	-0.0107414	0.0544911	0.845722
RA	2,3-dihydroxy-2-methylbutyrate levels	MR Egger	11	-0.0619796	0.142486	0.673815
RA	2,3-dihydroxy-2-methylbutyrate levels	Weighted median	11	-0.119988	0.0923811	0.194001
RA	2,3-dihydroxy-2-methylbutyrate levels	Inverse variance weighted	11	-0.0317486	0.0662392	0.631723
RA	2,3-dihydroxy-2-methylbutyrate levels	Simple mode	11	0.023826	0.147878	0.875208
RA	2,3-dihydroxy-2-methylbutyrate levels	Weighted mode	11	-0.0815717	0.114923	0.494048
RA	Androstenediol (3beta,17beta) disulfate (2) levels	MR Egger	22	-0.0404515	0.108861	0.714108
RA	Androstenediol (3beta,17beta) disulfate (2) levels	Weighted median	22	-0.0339733	0.0657445	0.605333
RA	Androstenediol (3beta,17beta) disulfate (2) levels	Inverse variance weighted	22	-0.0118548	0.0435911	0.785657
RA	Androstenediol (3beta,17beta) disulfate (2) levels	Simple mode	22	-0.0232297	0.10442	0.826101
RA	Androstenediol (3beta,17beta) disulfate (2) levels	Weighted mode	22	-0.0434143	0.0672095	0.525306
RA	X-21807 levels	MR Egger	14	0.110958	0.11549	0.355632
RA	X-21807 levels	Weighted median	14	0	0.0606705	1
RA	X-21807 levels	Inverse variance weighted	14	0.0209142	0.0472428	0.657986
RA	X-21807 levels	Simple mode	14	0.00630082	0.0918417	0.946348
RA	X-21807 levels	Weighted mode	14	0.0899944	0.0907801	0.339611
RA	2'-o-methyluridine levels	MR Egger	8	-0.017575	0.0285256	0.560453
RA	2'-o-methyluridine levels	Weighted median	8	-0.0142094	0.0221684	0.521538
RA	2'-o-methyluridine levels	Inverse variance weighted	8	-0.00921786	0.0216008	0.669571
RA	2'-o-methyluridine levels	Simple mode	8	-0.0668173	0.0986469	0.519942
RA	2'-o-methyluridine levels	Weighted mode	8	-0.016355	0.0220235	0.481884
RA	Paraxanthine to linoleate (18:2n6) ratio	MR Egger	13	-0.0489025	0.223109	0.830519
RA	Paraxanthine to linoleate (18:2n6) ratio	Weighted median	13	0.23456	0.0974166	0.016049
RA	Paraxanthine to linoleate (18:2n6) ratio	Inverse variance weighted	13	0.216083	0.0746489	0.00379572
RA	Paraxanthine to linoleate (18:2n6) ratio	Simple mode	13	0.233027	0.132611	0.104338
RA	Paraxanthine to linoleate (18:2n6) ratio	Weighted mode	13	0.236454	0.118732	0.0696865
RA	Picolinoylglycine levels	MR Egger	18	-0.252072	0.198757	0.222855
RA	Picolinoylglycine levels	Weighted median	18	-0.0327319	0.0861269	0.703914
RA	Picolinoylglycine levels	Inverse variance weighted	18	-0.0191344	0.0652254	0.769248
RA	Picolinoylglycine levels	Simple mode	18	0.0241608	0.158846	0.880897
RA	Picolinoylglycine levels	Weighted mode	18	-0.0579743	0.144983	0.694231
RA	Catechol sulfate levels	MR Egger	21	0.0858985	0.152604	0.580096
RA	Catechol sulfate levels	Weighted median	21	0.001752	0.0741812	0.981157
RA	Catechol sulfate levels	Inverse variance weighted	21	-0.0189238	0.0540012	0.726014
RA	Catechol sulfate levels	Simple mode	21	0.119651	0.120202	0.331424
RA	Catechol sulfate levels	Weighted mode	21	0.0959121	0.10315	0.363545
RA	Sphingomyelin (d18:2/24:1,d18:1/24:2) levels	MR Egger	26	0.174145	0.225914	0.448321
RA	Sphingomyelin (d18:2/24:1,d18:1/24:2) levels	Weighted median	26	0	0.0836162	1
RA	Sphingomyelin (d18:2/24:1,d18:1/24:2) levels	Inverse variance weighted	26	0.0845676	0.0646747	0.191014
RA	Sphingomyelin (d18:2/24:1,d18:1/24:2) levels	Simple mode	26	-0.0944127	0.15314	0.543131
RA	Sphingomyelin (d18:2/24:1,d18:1/24:2) levels	Weighted mode	26	-0.0944127	0.120531	0.440805
RA	Plasma free proline levels	MR Egger	24	-0.157076	0.123485	0.216647
RA	Plasma free proline levels	Weighted median	24	-0.0509453	0.078629	0.517037
RA	Plasma free proline levels	Inverse variance weighted	24	-0.0182806	0.053911	0.734544
RA	Plasma free proline levels	Simple mode	24	-0.0578335	0.122842	0.642222
RA	Plasma free proline levels	Weighted mode	24	-0.0426015	0.108609	0.698487
RA	Alpha-ketoglutarate to kynurenine ratio	MR Egger	19	0.041283	0.207396	0.844582
RA	Alpha-ketoglutarate to kynurenine ratio	Weighted median	19	-0.0813996	0.0635338	0.200123
RA	Alpha-ketoglutarate to kynurenine ratio	Inverse variance weighted	19	-0.178901	0.0758552	0.0183511
RA	Alpha-ketoglutarate to kynurenine ratio	Simple mode	19	-0.0564757	0.0908916	0.542158
RA	Alpha-ketoglutarate to kynurenine ratio	Weighted mode	19	-0.071094	0.0634863	0.277506
RA	5-dodecenoylcarnitine (C12:1) levels	MR Egger	18	0.0293964	0.197216	0.883371
RA	5-dodecenoylcarnitine (C12:1) levels	Weighted median	18	-0.0589013	0.0801139	0.462206
RA	5-dodecenoylcarnitine (C12:1) levels	Inverse variance weighted	18	-0.0399933	0.0544829	0.462917
RA	5-dodecenoylcarnitine (C12:1) levels	Simple mode	18	-0.0768594	0.139415	0.588602
RA	5-dodecenoylcarnitine (C12:1) levels	Weighted mode	18	-0.136523	0.121821	0.278004
RA	1-(1-enyl-palmitoyl)-GPE (p-16:0) levels	MR Egger	21	-0.152894	0.174993	0.393183
RA	1-(1-enyl-palmitoyl)-GPE (p-16:0) levels	Weighted median	21	-0.0542272	0.0785836	0.490159
RA	1-(1-enyl-palmitoyl)-GPE (p-16:0) levels	Inverse variance weighted	21	0.00224197	0.0628614	0.971549
RA	1-(1-enyl-palmitoyl)-GPE (p-16:0) levels	Simple mode	21	-0.0208484	0.139613	0.882789
RA	1-(1-enyl-palmitoyl)-GPE (p-16:0) levels	Weighted mode	21	-0.100364	0.103924	0.345706
RA	Theobromine levels	MR Egger	19	-0.0981772	0.176578	0.585455
RA	Theobromine levels	Weighted median	19	-0.129836	0.0760662	0.0878451
RA	Theobromine levels	Inverse variance weighted	19	-0.122002	0.0533785	0.0222772
RA	Theobromine levels	Simple mode	19	-0.207678	0.127449	0.120583
RA	Theobromine levels	Weighted mode	19	-0.149966	0.105144	0.170899
RA	3-ethylcatechol sulfate (1) levels	MR Egger	15	-0.307563	0.170927	0.0952002
RA	3-ethylcatechol sulfate (1) levels	Weighted median	15	-0.00118782	0.0804075	0.988214
RA	3-ethylcatechol sulfate (1) levels	Inverse variance weighted	15	0.0112994	0.0633461	0.858429
RA	3-ethylcatechol sulfate (1) levels	Simple mode	15	-0.134444	0.147787	0.378369
RA	3-ethylcatechol sulfate (1) levels	Weighted mode	15	0.049576	0.12285	0.69264
RA	Arachidonoylcholine levels	MR Egger	17	0.102799	0.126479	0.429057
RA	Arachidonoylcholine levels	Weighted median	17	0.0823472	0.0653693	0.207769
RA	Arachidonoylcholine levels	Inverse variance weighted	17	0.0758793	0.0563628	0.178217
RA	Arachidonoylcholine levels	Simple mode	17	-0.0334086	0.103605	0.751278
RA	Arachidonoylcholine levels	Weighted mode	17	0.103	0.0716837	0.170023
RA	Hypotaurine to cysteine ratio	MR Egger	24	0.0455205	0.132032	0.733542
RA	Hypotaurine to cysteine ratio	Weighted median	24	0	0.0598094	1
RA	Hypotaurine to cysteine ratio	Inverse variance weighted	24	-0.0474037	0.0458379	0.301061
RA	Hypotaurine to cysteine ratio	Simple mode	24	0.00986215	0.100522	0.922696
RA	Hypotaurine to cysteine ratio	Weighted mode	24	0.000863374	0.0783091	0.991298
RA	Umbelliferone sulfate levels	MR Egger	17	0.157681	0.0940532	0.114351
RA	Umbelliferone sulfate levels	Weighted median	17	0.0609612	0.0553961	0.271131
RA	Umbelliferone sulfate levels	Inverse variance weighted	17	0.00884246	0.0395321	0.823008
RA	Umbelliferone sulfate levels	Simple mode	17	0.0788972	0.095248	0.419666
RA	Umbelliferone sulfate levels	Weighted mode	17	0.0634824	0.0806332	0.442615
RA	X-22520 levels	MR Egger	18	-0.0582359	0.128564	0.65665
RA	X-22520 levels	Weighted median	18	-0.0122058	0.0565291	0.82905
RA	X-22520 levels	Inverse variance weighted	18	-0.0180877	0.0472154	0.701653
RA	X-22520 levels	Simple mode	18	0.0797634	0.0966586	0.420683
RA	X-22520 levels	Weighted mode	18	-0.0143499	0.0809662	0.86142
RA	Pristanate levels	MR Egger	8	0.49892	0.40851	0.267774
RA	Pristanate levels	Weighted median	8	-0.100207	0.0986171	0.309574
RA	Pristanate levels	Inverse variance weighted	8	-0.00837331	0.092506	0.927877
RA	Pristanate levels	Simple mode	8	-0.115068	0.12717	0.395627
RA	Pristanate levels	Weighted mode	8	-0.112731	0.115427	0.361282
RA	X-17328 levels	MR Egger	15	-0.0694761	0.158662	0.668656
RA	X-17328 levels	Weighted median	15	0	0.075972	1
RA	X-17328 levels	Inverse variance weighted	15	-0.0544981	0.054694	0.319047
RA	X-17328 levels	Simple mode	15	-0.0441827	0.135504	0.7492
RA	X-17328 levels	Weighted mode	15	-0.00113935	0.115008	0.992235
RA	Glycine conjugate of C10H14O2 (1) levels	MR Egger	19	0.00251479	0.0833097	0.97627
RA	Glycine conjugate of C10H14O2 (1) levels	Weighted median	19	-0.0491744	0.0532482	0.35575
RA	Glycine conjugate of C10H14O2 (1) levels	Inverse variance weighted	19	-0.0292089	0.0412079	0.478438
RA	Glycine conjugate of C10H14O2 (1) levels	Simple mode	19	0.00883381	0.0958146	0.92756
RA	Glycine conjugate of C10H14O2 (1) levels	Weighted mode	19	-0.0353076	0.0597134	0.561683
RA	Inosine 5'-monophosphate (IMP) to urate ratio	MR Egger	15	0.0922299	0.17852	0.614085
RA	Inosine 5'-monophosphate (IMP) to urate ratio	Weighted median	15	0	0.0644415	1
RA	Inosine 5'-monophosphate (IMP) to urate ratio	Inverse variance weighted	15	0.0396186	0.0466167	0.395391
RA	Inosine 5'-monophosphate (IMP) to urate ratio	Simple mode	15	-0.0719902	0.137306	0.608268
RA	Inosine 5'-monophosphate (IMP) to urate ratio	Weighted mode	15	-0.104072	0.130965	0.440077
RA	Pyridoxal levels	MR Egger	26	0.061188	0.0899571	0.502893
RA	Pyridoxal levels	Weighted median	26	0.0261746	0.0573747	0.648243
RA	Pyridoxal levels	Inverse variance weighted	26	-0.0258028	0.0421603	0.540526
RA	Pyridoxal levels	Simple mode	26	-0.0135903	0.100973	0.894011
RA	Pyridoxal levels	Weighted mode	26	0.0312487	0.0756102	0.68292
RA	Beta-hydroxyisovalerate levels	MR Egger	23	0.209059	0.0918206	0.0333807
RA	Beta-hydroxyisovalerate levels	Weighted median	23	0.0864364	0.0626693	0.167818
RA	Beta-hydroxyisovalerate levels	Inverse variance weighted	23	0.0882204	0.0455649	0.0528497
RA	Beta-hydroxyisovalerate levels	Simple mode	23	0.0759637	0.102809	0.467788
RA	Beta-hydroxyisovalerate levels	Weighted mode	23	0.0901931	0.0732539	0.231234
RA	2,3-dihydroxyisovalerate levels	MR Egger	17	0.102768	0.278994	0.717759
RA	2,3-dihydroxyisovalerate levels	Weighted median	17	-0.102483	0.0916821	0.26365
RA	2,3-dihydroxyisovalerate levels	Inverse variance weighted	17	0.0228565	0.09743	0.814524
RA	2,3-dihydroxyisovalerate levels	Simple mode	17	-0.0789096	0.155243	0.618182
RA	2,3-dihydroxyisovalerate levels	Weighted mode	17	-0.0789096	0.145588	0.595284
RA	Dopamine 3-o-sulfate levels	MR Egger	19	-0.14417	0.104893	0.18715
RA	Dopamine 3-o-sulfate levels	Weighted median	19	-0.101612	0.0680852	0.135588
RA	Dopamine 3-o-sulfate levels	Inverse variance weighted	19	-0.070397	0.047995	0.142442
RA	Dopamine 3-o-sulfate levels	Simple mode	19	-0.0911696	0.0983311	0.366105
RA	Dopamine 3-o-sulfate levels	Weighted mode	19	-0.0871633	0.0703408	0.231203
RA	Alpha-ketobutyrate to 3-methyl-2-oxobutyrate ratio	MR Egger	17	0.121694	0.203302	0.55838
RA	Alpha-ketobutyrate to 3-methyl-2-oxobutyrate ratio	Weighted median	17	0	0.0786747	1
RA	Alpha-ketobutyrate to 3-methyl-2-oxobutyrate ratio	Inverse variance weighted	17	0.0294968	0.0580865	0.611588
RA	Alpha-ketobutyrate to 3-methyl-2-oxobutyrate ratio	Simple mode	17	0.039097	0.126621	0.761479
RA	Alpha-ketobutyrate to 3-methyl-2-oxobutyrate ratio	Weighted mode	17	0.0182208	0.101896	0.860325
RA	1-linoleoyl-GPE (18:2) levels	MR Egger	26	-0.201118	0.0538082	0.00101952
RA	1-linoleoyl-GPE (18:2) levels	Weighted median	26	-0.141469	0.0331837	2.01514e-05
RA	1-linoleoyl-GPE (18:2) levels	Inverse variance weighted	26	-0.078239	0.0285869	0.00620234
RA	1-linoleoyl-GPE (18:2) levels	Simple mode	26	-0.0731494	0.0889863	0.418831
RA	1-linoleoyl-GPE (18:2) levels	Weighted mode	26	-0.13474	0.0356727	0.000876201
RA	10-undecenoate (11:1n1) levels	MR Egger	14	0.0203598	0.0926949	0.829841
RA	10-undecenoate (11:1n1) levels	Weighted median	14	0.0111937	0.0539348	0.835587
RA	10-undecenoate (11:1n1) levels	Inverse variance weighted	14	0.00851544	0.0570517	0.88135
RA	10-undecenoate (11:1n1) levels	Simple mode	14	0.0485865	0.105387	0.652395
RA	10-undecenoate (11:1n1) levels	Weighted mode	14	0.0169421	0.0524226	0.751696
RA	Margarate (17:0) levels	MR Egger	15	-0.240421	0.142177	0.114656
RA	Margarate (17:0) levels	Weighted median	15	-0.138564	0.0818769	0.0905801
RA	Margarate (17:0) levels	Inverse variance weighted	15	-0.152353	0.059195	0.0100604
RA	Margarate (17:0) levels	Simple mode	15	-0.135127	0.139292	0.348457
RA	Margarate (17:0) levels	Weighted mode	15	-0.120269	0.125249	0.353223
RA	Octadecanedioate levels	MR Egger	22	0.141891	0.136239	0.310077
RA	Octadecanedioate levels	Weighted median	22	0	0.0596181	1
RA	Octadecanedioate levels	Inverse variance weighted	22	0.0715271	0.0494998	0.148458
RA	Octadecanedioate levels	Simple mode	22	0.00944254	0.0983131	0.924395
RA	Octadecanedioate levels	Weighted mode	22	-0.00884618	0.0631099	0.889861
RA	Alpha-ketoglutarate levels	MR Egger	19	0.0859562	0.123527	0.495927
RA	Alpha-ketoglutarate levels	Weighted median	19	-0.0317517	0.0663583	0.632302
RA	Alpha-ketoglutarate levels	Inverse variance weighted	19	-0.0719884	0.0452675	0.11177
RA	Alpha-ketoglutarate levels	Simple mode	19	-0.0153535	0.0971579	0.876196
RA	Alpha-ketoglutarate levels	Weighted mode	19	-0.0344058	0.062949	0.591388
RA	Eicosenedioate (C20:1-DC) levels	MR Egger	14	-0.247977	0.16683	0.162965
RA	Eicosenedioate (C20:1-DC) levels	Weighted median	14	-0.113638	0.0996346	0.254059
RA	Eicosenedioate (C20:1-DC) levels	Inverse variance weighted	14	-0.159383	0.0727439	0.0284509
RA	Eicosenedioate (C20:1-DC) levels	Simple mode	14	-0.10252	0.140222	0.477673
RA	Eicosenedioate (C20:1-DC) levels	Weighted mode	14	-0.0991946	0.116439	0.40969
RA	Alpha-ketobutyrate levels	MR Egger	14	0.132895	0.166477	0.440221
RA	Alpha-ketobutyrate levels	Weighted median	14	-0.102771	0.0912901	0.260265
RA	Alpha-ketobutyrate levels	Inverse variance weighted	14	-0.0502181	0.0626016	0.422446
RA	Alpha-ketobutyrate levels	Simple mode	14	0.179411	0.164403	0.294961
RA	Alpha-ketobutyrate levels	Weighted mode	14	-0.175499	0.136815	0.221978
RA	Nisinate (24:6n3) levels	MR Egger	15	0.201414	0.165436	0.24506
RA	Nisinate (24:6n3) levels	Weighted median	15	0.143164	0.063464	0.0240815
RA	Nisinate (24:6n3) levels	Inverse variance weighted	15	0.108496	0.0463025	0.0191188
RA	Nisinate (24:6n3) levels	Simple mode	15	0.109672	0.124843	0.39451
RA	Nisinate (24:6n3) levels	Weighted mode	15	0.225137	0.0640816	0.00344312
RA	Carnitine C18:2 levels	MR Egger	21	0.0727206	0.12435	0.56556
RA	Carnitine C18:2 levels	Weighted median	21	0.085348	0.0583405	0.143487
RA	Carnitine C18:2 levels	Inverse variance weighted	21	0.0799983	0.0440552	0.0693911
RA	Carnitine C18:2 levels	Simple mode	21	0.016692	0.110759	0.881717
RA	Carnitine C18:2 levels	Weighted mode	21	0.067359	0.0883272	0.454599
RA	X-25265 levels	MR Egger	23	-0.13427	0.145026	0.365051
RA	X-25265 levels	Weighted median	23	-0.0579379	0.0817041	0.478251
RA	X-25265 levels	Inverse variance weighted	23	-0.105835	0.0534157	0.0475525
RA	X-25265 levels	Simple mode	23	-0.0537121	0.148893	0.721732
RA	X-25265 levels	Weighted mode	23	-0.0127732	0.135676	0.925846
RA	1-oleoylglycerol (18:1) levels	MR Egger	20	0.274321	0.175857	0.136192
RA	1-oleoylglycerol (18:1) levels	Weighted median	20	0.0204496	0.077789	0.792639
RA	1-oleoylglycerol (18:1) levels	Inverse variance weighted	20	0.0415977	0.0533974	0.435967
RA	1-oleoylglycerol (18:1) levels	Simple mode	20	0.20893	0.111893	0.0773758
RA	1-oleoylglycerol (18:1) levels	Weighted mode	20	0.0365785	0.0862662	0.676314
RA	X-17357 levels	MR Egger	22	0.0911731	0.0777785	0.254885
RA	X-17357 levels	Weighted median	22	0.0554612	0.0509933	0.276765
RA	X-17357 levels	Inverse variance weighted	22	0.0155301	0.0346805	0.654294
RA	X-17357 levels	Simple mode	22	-0.0656014	0.0912727	0.480222
RA	X-17357 levels	Weighted mode	22	0.0763119	0.0473612	0.122049
RA	Alpha-ketoglutarate to alpha-ketobutyrate ratio	MR Egger	15	-0.278567	0.198557	0.184059
RA	Alpha-ketoglutarate to alpha-ketobutyrate ratio	Weighted median	15	-0.101799	0.0809634	0.208628
RA	Alpha-ketoglutarate to alpha-ketobutyrate ratio	Inverse variance weighted	15	-0.0727887	0.0573324	0.20423
RA	Alpha-ketoglutarate to alpha-ketobutyrate ratio	Simple mode	15	-0.168594	0.135659	0.234362
RA	Alpha-ketoglutarate to alpha-ketobutyrate ratio	Weighted mode	15	-0.108512	0.124701	0.398881
RA	Glucose to N-stearoyl-sphingosine (d18:1 to 18:0) ratio	MR Egger	14	-0.212497	0.24801	0.408334
RA	Glucose to N-stearoyl-sphingosine (d18:1 to 18:0) ratio	Weighted median	14	-0.0378852	0.0728685	0.603125
RA	Glucose to N-stearoyl-sphingosine (d18:1 to 18:0) ratio	Inverse variance weighted	14	-0.0584067	0.0582472	0.315987
RA	Glucose to N-stearoyl-sphingosine (d18:1 to 18:0) ratio	Simple mode	14	-0.187785	0.113812	0.12289
RA	Glucose to N-stearoyl-sphingosine (d18:1 to 18:0) ratio	Weighted mode	14	-0.0121785	0.0839359	0.886863
RA	Phytanate levels	MR Egger	15	0.0409852	0.0918176	0.66267
RA	Phytanate levels	Weighted median	15	0.0666376	0.0691029	0.334883
RA	Phytanate levels	Inverse variance weighted	15	0.0502424	0.0482805	0.298045
RA	Phytanate levels	Simple mode	15	0.0581464	0.105155	0.589014
RA	Phytanate levels	Weighted mode	15	0.0757097	0.0647306	0.261685
RA	1-arachidonoyl-gpc (20:4n6) levels	MR Egger	24	0.125893	0.0406767	0.00528694
RA	1-arachidonoyl-gpc (20:4n6) levels	Weighted median	24	0.0943425	0.0285769	0.000962203
RA	1-arachidonoyl-gpc (20:4n6) levels	Inverse variance weighted	24	0.0837094	0.0272003	0.00208735
RA	1-arachidonoyl-gpc (20:4n6) levels	Simple mode	24	-0.086869	0.108127	0.42997
RA	1-arachidonoyl-gpc (20:4n6) levels	Weighted mode	24	0.0971271	0.0291923	0.00293199
RA	Butyrate/isobutyrate (4:0) levels	MR Egger	16	-0.288944	0.212771	0.195946
RA	Butyrate/isobutyrate (4:0) levels	Weighted median	16	0	0.0831316	1
RA	Butyrate/isobutyrate (4:0) levels	Inverse variance weighted	16	-0.0894171	0.0580881	0.123722
RA	Butyrate/isobutyrate (4:0) levels	Simple mode	16	-0.207305	0.126135	0.121067
RA	Butyrate/isobutyrate (4:0) levels	Weighted mode	16	-0.00326041	0.0961554	0.973398
RA	X-21258 levels	MR Egger	17	-0.126953	0.15682	0.430855
RA	X-21258 levels	Weighted median	17	-0.0417357	0.0829584	0.614899
RA	X-21258 levels	Inverse variance weighted	17	-0.0177782	0.0615083	0.772553
RA	X-21258 levels	Simple mode	17	-0.0635954	0.134871	0.64363
RA	X-21258 levels	Weighted mode	17	-0.0532932	0.117367	0.655874
RA	4-allylphenol sulfate levels	MR Egger	20	-0.0328618	0.197425	0.869657
RA	4-allylphenol sulfate levels	Weighted median	20	0	0.0772761	1
RA	4-allylphenol sulfate levels	Inverse variance weighted	20	-0.0332142	0.0575419	0.563792
RA	4-allylphenol sulfate levels	Simple mode	20	0.0471743	0.158319	0.76896
RA	4-allylphenol sulfate levels	Weighted mode	20	0.0824656	0.158709	0.609342
RA	9-hydroxystearate levels	MR Egger	21	-0.0887967	0.16403	0.594561
RA	9-hydroxystearate levels	Weighted median	21	0.0617694	0.0822739	0.452786
RA	9-hydroxystearate levels	Inverse variance weighted	21	-0.0253377	0.0558009	0.649777
RA	9-hydroxystearate levels	Simple mode	21	0.0884577	0.149108	0.559665
RA	9-hydroxystearate levels	Weighted mode	21	0.0956116	0.126394	0.458194
RA	Phosphate to linoleoyl-arachidonoyl-glycerol (18:2 to 20:4) [2] ratio	MR Egger	25	-0.112863	0.0921764	0.233187
RA	Phosphate to linoleoyl-arachidonoyl-glycerol (18:2 to 20:4) [2] ratio	Weighted median	25	-0.104945	0.044703	0.0188947
RA	Phosphate to linoleoyl-arachidonoyl-glycerol (18:2 to 20:4) [2] ratio	Inverse variance weighted	25	0.0109955	0.046836	0.81439
RA	Phosphate to linoleoyl-arachidonoyl-glycerol (18:2 to 20:4) [2] ratio	Simple mode	25	-0.00856673	0.122633	0.944886
RA	Phosphate to linoleoyl-arachidonoyl-glycerol (18:2 to 20:4) [2] ratio	Weighted mode	25	-0.104311	0.0439732	0.0260463
RA	Pyrraline levels	MR Egger	16	-0.226888	0.283481	0.436872
RA	Pyrraline levels	Weighted median	16	0.144971	0.0877539	0.0985319
RA	Pyrraline levels	Inverse variance weighted	16	0.0811997	0.0907425	0.370875
RA	Pyrraline levels	Simple mode	16	0.121738	0.160422	0.459696
RA	Pyrraline levels	Weighted mode	16	0.175834	0.140188	0.228938
RA	1,2-dilinoleoyl-GPE (18:2/18:2) levels	MR Egger	19	-0.204122	0.0725889	0.0119978
RA	1,2-dilinoleoyl-GPE (18:2/18:2) levels	Weighted median	19	-0.16259	0.0424958	0.000130234
RA	1,2-dilinoleoyl-GPE (18:2/18:2) levels	Inverse variance weighted	19	-0.0886357	0.0326379	0.00661309
RA	1,2-dilinoleoyl-GPE (18:2/18:2) levels	Simple mode	19	0.0238395	0.100987	0.816048
RA	1,2-dilinoleoyl-GPE (18:2/18:2) levels	Weighted mode	19	-0.149797	0.0454977	0.00404852
RA	Vanillic acid glycine levels	MR Egger	18	0.173244	0.138768	0.22983
RA	Vanillic acid glycine levels	Weighted median	18	0.103309	0.0679237	0.128272
RA	Vanillic acid glycine levels	Inverse variance weighted	18	0.0512165	0.0500901	0.306551
RA	Vanillic acid glycine levels	Simple mode	18	0.0668288	0.122188	0.591532
RA	Vanillic acid glycine levels	Weighted mode	18	0.115992	0.0850656	0.190492
RA	Hexanoylglutamine levels	MR Egger	23	-0.0288013	0.0606076	0.639543
RA	Hexanoylglutamine levels	Weighted median	23	-0.0444519	0.0404697	0.272031
RA	Hexanoylglutamine levels	Inverse variance weighted	23	-0.00821749	0.0293635	0.77959
RA	Hexanoylglutamine levels	Simple mode	23	-0.0290388	0.0738761	0.698047
RA	Hexanoylglutamine levels	Weighted mode	23	-0.0407793	0.044312	0.367409
RA	Taurochenodeoxycholic acid 3-sulfate levels	MR Egger	31	-0.115148	0.108776	0.29853
RA	Taurochenodeoxycholic acid 3-sulfate levels	Weighted median	31	0.0127309	0.0532907	0.811187
RA	Taurochenodeoxycholic acid 3-sulfate levels	Inverse variance weighted	31	0.0171857	0.0369083	0.641479
RA	Taurochenodeoxycholic acid 3-sulfate levels	Simple mode	31	0.0590255	0.0952443	0.540116
RA	Taurochenodeoxycholic acid 3-sulfate levels	Weighted mode	31	0.0556238	0.0857541	0.521504
RA	Pregnenediol disulfate (C21H34O8S2) levels	MR Egger	24	0.0108483	0.059207	0.856298
RA	Pregnenediol disulfate (C21H34O8S2) levels	Weighted median	24	0.0519871	0.0465877	0.264466
RA	Pregnenediol disulfate (C21H34O8S2) levels	Inverse variance weighted	24	0.01854	0.0345475	0.591508
RA	Pregnenediol disulfate (C21H34O8S2) levels	Simple mode	24	0.109026	0.0794286	0.183106
RA	Pregnenediol disulfate (C21H34O8S2) levels	Weighted mode	24	0.0438251	0.0397946	0.282166
RA	1-palmitoleoylglycerol (16:1) levels	MR Egger	24	0.00768495	0.103968	0.941745
RA	1-palmitoleoylglycerol (16:1) levels	Weighted median	24	0	0.0547337	1
RA	1-palmitoleoylglycerol (16:1) levels	Inverse variance weighted	24	0.00931002	0.0407341	0.819214
RA	1-palmitoleoylglycerol (16:1) levels	Simple mode	24	0.0269454	0.0868341	0.75912
RA	1-palmitoleoylglycerol (16:1) levels	Weighted mode	24	0.0193326	0.0715735	0.789486
RA	Gamma-glutamylglycine levels	MR Egger	20	-0.0924737	0.0566957	0.120252
RA	Gamma-glutamylglycine levels	Weighted median	20	-0.0747098	0.0413778	0.0709883
RA	Gamma-glutamylglycine levels	Inverse variance weighted	20	-0.0649424	0.0337049	0.0540053
RA	Gamma-glutamylglycine levels	Simple mode	20	0.00641301	0.10976	0.954018
RA	Gamma-glutamylglycine levels	Weighted mode	20	-0.0787174	0.0441303	0.0904455
RA	5,6-dihydrouridine levels	MR Egger	24	-0.091804	0.0824047	0.277276
RA	5,6-dihydrouridine levels	Weighted median	24	-0.0483981	0.0606557	0.424921
RA	5,6-dihydrouridine levels	Inverse variance weighted	24	-0.060871	0.0433177	0.159955
RA	5,6-dihydrouridine levels	Simple mode	24	0.0460163	0.107117	0.671491
RA	5,6-dihydrouridine levels	Weighted mode	24	-0.0486454	0.0720045	0.506038
RA	Hydroxy-cmpf levels	MR Egger	16	0.319291	0.207261	0.145727
RA	Hydroxy-cmpf levels	Weighted median	16	0	0.074618	1
RA	Hydroxy-cmpf levels	Inverse variance weighted	16	-0.0704584	0.0546085	0.196966
RA	Hydroxy-cmpf levels	Simple mode	16	-0.0817389	0.15248	0.599774
RA	Hydroxy-cmpf levels	Weighted mode	16	0.0471561	0.0827683	0.57729
RA	Alpha-ketobutyrate to 4-methyl-2-oxopentanoate ratio	MR Egger	13	-0.30458	0.412646	0.475897
RA	Alpha-ketobutyrate to 4-methyl-2-oxopentanoate ratio	Weighted median	13	-0.0550748	0.108763	0.612592
RA	Alpha-ketobutyrate to 4-methyl-2-oxopentanoate ratio	Inverse variance weighted	13	-0.0829652	0.0949121	0.382049
RA	Alpha-ketobutyrate to 4-methyl-2-oxopentanoate ratio	Simple mode	13	-0.0198363	0.191467	0.919197
RA	Alpha-ketobutyrate to 4-methyl-2-oxopentanoate ratio	Weighted mode	13	0.0263361	0.177473	0.884495
RA	Adenosine 5'-monophosphate (AMP) to citrate ratio	MR Egger	15	0.131634	0.141721	0.369907
RA	Adenosine 5'-monophosphate (AMP) to citrate ratio	Weighted median	15	0.012867	0.0878795	0.883593
RA	Adenosine 5'-monophosphate (AMP) to citrate ratio	Inverse variance weighted	15	0.00112512	0.0635315	0.985871
RA	Adenosine 5'-monophosphate (AMP) to citrate ratio	Simple mode	15	0.0271975	0.160903	0.86819
RA	Adenosine 5'-monophosphate (AMP) to citrate ratio	Weighted mode	15	0.0385783	0.131507	0.773553
RA	N-acetylglutamate levels	MR Egger	17	0.0566331	0.221132	0.801348
RA	N-acetylglutamate levels	Weighted median	17	0	0.0786323	1
RA	N-acetylglutamate levels	Inverse variance weighted	17	0.0507693	0.067262	0.45037
RA	N-acetylglutamate levels	Simple mode	17	-0.00135397	0.115213	0.990769
RA	N-acetylglutamate levels	Weighted mode	17	-0.0452598	0.0905621	0.624043
RA	EDTA levels	MR Egger	11	-0.333086	0.202453	0.134328
RA	EDTA levels	Weighted median	11	0.0540443	0.098352	0.582663
RA	EDTA levels	Inverse variance weighted	11	-0.0358623	0.0703239	0.61008
RA	EDTA levels	Simple mode	11	0.152777	0.197156	0.456329
RA	EDTA levels	Weighted mode	11	0.169968	0.230842	0.478467
RA	Arachidonate (20:4n6) to paraxanthine ratio	MR Egger	14	0.570999	0.149039	0.00239037
RA	Arachidonate (20:4n6) to paraxanthine ratio	Weighted median	14	0.191005	0.0621984	0.00213415
RA	Arachidonate (20:4n6) to paraxanthine ratio	Inverse variance weighted	14	0.121447	0.0537851	0.0239457
RA	Arachidonate (20:4n6) to paraxanthine ratio	Simple mode	14	0.110786	0.180499	0.549952
RA	Arachidonate (20:4n6) to paraxanthine ratio	Weighted mode	14	0.214063	0.0638523	0.00519598
RA	X-12812 levels	MR Egger	11	0.0252347	0.190868	0.897727
RA	X-12812 levels	Weighted median	11	0	0.0983175	1
RA	X-12812 levels	Inverse variance weighted	11	0.00726167	0.0725933	0.920319
RA	X-12812 levels	Simple mode	11	0.000292091	0.150874	0.998493
RA	X-12812 levels	Weighted mode	11	-0.0134307	0.124929	0.916513
RA	X-12544 levels	MR Egger	12	-0.161447	0.14218	0.282645
RA	X-12544 levels	Weighted median	12	-0.0488147	0.082	0.551642
RA	X-12544 levels	Inverse variance weighted	12	0.0160484	0.060211	0.789826
RA	X-12544 levels	Simple mode	12	0.00691509	0.120232	0.955167
RA	X-12544 levels	Weighted mode	12	-0.0550107	0.102376	0.601735
RA	3-(3-hydroxyphenyl)propionate levels	MR Egger	15	-0.0847525	0.148491	0.577896
RA	3-(3-hydroxyphenyl)propionate levels	Weighted median	15	-0.124902	0.0756892	0.0989029
RA	3-(3-hydroxyphenyl)propionate levels	Inverse variance weighted	15	-0.0508945	0.0570838	0.37262
RA	3-(3-hydroxyphenyl)propionate levels	Simple mode	15	-0.051645	0.131583	0.700606
RA	3-(3-hydroxyphenyl)propionate levels	Weighted mode	15	-0.132971	0.0902722	0.162876
RA	Thymol sulfate levels	MR Egger	16	0.00971605	0.197681	0.961494
RA	Thymol sulfate levels	Weighted median	16	-0.0142951	0.0747803	0.848399
RA	Thymol sulfate levels	Inverse variance weighted	16	0.00784843	0.0685053	0.908788
RA	Thymol sulfate levels	Simple mode	16	0.0477609	0.134755	0.727951
RA	Thymol sulfate levels	Weighted mode	16	-0.02524	0.0988711	0.801973
RA	4-hydroxyphenylacetoylcarnitine levels	MR Egger	19	0.0698292	0.147527	0.641997
RA	4-hydroxyphenylacetoylcarnitine levels	Weighted median	19	0.0621577	0.0639361	0.330959
RA	4-hydroxyphenylacetoylcarnitine levels	Inverse variance weighted	19	0.0317308	0.0512016	0.53544
RA	4-hydroxyphenylacetoylcarnitine levels	Simple mode	19	-0.0675735	0.120043	0.580441
RA	4-hydroxyphenylacetoylcarnitine levels	Weighted mode	19	0.0540256	0.0690714	0.444282
RA	1-methylxanthine levels	MR Egger	22	-0.190212	0.064543	0.00796954
RA	1-methylxanthine levels	Weighted median	22	-0.145674	0.0425034	0.0006095
RA	1-methylxanthine levels	Inverse variance weighted	22	-0.100119	0.0390815	0.0104132
RA	1-methylxanthine levels	Simple mode	22	0.105059	0.13664	0.450531
RA	1-methylxanthine levels	Weighted mode	22	-0.179474	0.0413468	0.000287689
RA	X-25433 levels	MR Egger	24	-0.10506	0.069576	0.145271
RA	X-25433 levels	Weighted median	24	-0.0462767	0.0514356	0.368279
RA	X-25433 levels	Inverse variance weighted	24	-0.0347457	0.0353451	0.325587
RA	X-25433 levels	Simple mode	24	0.0554117	0.091833	0.55215
RA	X-25433 levels	Weighted mode	24	-0.0456956	0.0510318	0.379831
RA	X-12007 levels	MR Egger	9	0.243598	0.22542	0.315676
RA	X-12007 levels	Weighted median	9	0	0.106426	1
RA	X-12007 levels	Inverse variance weighted	9	-0.0374713	0.080044	0.639689
RA	X-12007 levels	Simple mode	9	0.00671035	0.169919	0.969466
RA	X-12007 levels	Weighted mode	9	0.00671035	0.138131	0.962445
RA	Retinol (Vitamin A) levels	MR Egger	19	0.122531	0.163822	0.464709
RA	Retinol (Vitamin A) levels	Weighted median	19	0	0.0772812	1
RA	Retinol (Vitamin A) levels	Inverse variance weighted	19	-0.0220214	0.0557554	0.69287
RA	Retinol (Vitamin A) levels	Simple mode	19	-0.0340604	0.152548	0.825835
RA	Retinol (Vitamin A) levels	Weighted mode	19	0.064319	0.136882	0.644077
RA	Sarcosine levels	MR Egger	15	0.171583	0.185708	0.37235
RA	Sarcosine levels	Weighted median	15	0	0.0896674	1
RA	Sarcosine levels	Inverse variance weighted	15	-0.0231586	0.0651239	0.722134
RA	Sarcosine levels	Simple mode	15	-0.0904194	0.143574	0.538984
RA	Sarcosine levels	Weighted mode	15	-0.0223918	0.131606	0.867332
RA	Propionylcarnitine (c3) levels	MR Egger	20	0.0893504	0.100692	0.386589
RA	Propionylcarnitine (c3) levels	Weighted median	20	0.065662	0.0614101	0.284962
RA	Propionylcarnitine (c3) levels	Inverse variance weighted	20	0.037966	0.0519935	0.465264
RA	Propionylcarnitine (c3) levels	Simple mode	20	-0.024127	0.0978402	0.807866
RA	Propionylcarnitine (c3) levels	Weighted mode	20	0.0208015	0.0593816	0.729966
RA	X-21742 levels	MR Egger	16	-0.0753709	0.137234	0.591511
RA	X-21742 levels	Weighted median	16	-0.0363851	0.0779206	0.640535
RA	X-21742 levels	Inverse variance weighted	16	-0.0450188	0.0549297	0.412461
RA	X-21742 levels	Simple mode	16	-0.183018	0.13396	0.192008
RA	X-21742 levels	Weighted mode	16	0.0129101	0.107246	0.905781
RA	1-palmitoyl-2-docosahexaenoyl-GPE (16:0/22:6) levels	MR Egger	17	-0.0459465	0.0475036	0.348771
RA	1-palmitoyl-2-docosahexaenoyl-GPE (16:0/22:6) levels	Weighted median	17	-0.0223989	0.0235388	0.341313
RA	1-palmitoyl-2-docosahexaenoyl-GPE (16:0/22:6) levels	Inverse variance weighted	17	-0.0183427	0.0289622	0.526517
RA	1-palmitoyl-2-docosahexaenoyl-GPE (16:0/22:6) levels	Simple mode	17	-0.00441809	0.0784669	0.955796
RA	1-palmitoyl-2-docosahexaenoyl-GPE (16:0/22:6) levels	Weighted mode	17	-0.0232889	0.0252859	0.370716
RA	1-palmitoyl-2-linoleoyl-GPE (16:0/18:2) levels	MR Egger	22	-0.0756161	0.035753	0.0471823
RA	1-palmitoyl-2-linoleoyl-GPE (16:0/18:2) levels	Weighted median	22	-0.0403535	0.0274005	0.140824
RA	1-palmitoyl-2-linoleoyl-GPE (16:0/18:2) levels	Inverse variance weighted	22	-0.0333157	0.0198691	0.0935896
RA	1-palmitoyl-2-linoleoyl-GPE (16:0/18:2) levels	Simple mode	22	0.093069	0.0606047	0.139549
RA	1-palmitoyl-2-linoleoyl-GPE (16:0/18:2) levels	Weighted mode	22	-0.0472179	0.0235411	0.057936
RA	Alpha-ketobutyrate to 3-methyl-2-oxovalerate ratio	MR Egger	15	-0.211374	0.30365	0.498616
RA	Alpha-ketobutyrate to 3-methyl-2-oxovalerate ratio	Weighted median	15	-0.0538409	0.0968992	0.578458
RA	Alpha-ketobutyrate to 3-methyl-2-oxovalerate ratio	Inverse variance weighted	15	-0.123826	0.0867717	0.153571
RA	Alpha-ketobutyrate to 3-methyl-2-oxovalerate ratio	Simple mode	15	0.130695	0.192045	0.50726
RA	Alpha-ketobutyrate to 3-methyl-2-oxovalerate ratio	Weighted mode	15	-0.0168762	0.154837	0.914754
RA	1-linoleoyl-2-arachidonoyl-GPC (18:2/20:4n6) levels	MR Egger	21	0.133086	0.0652748	0.055623
RA	1-linoleoyl-2-arachidonoyl-GPC (18:2/20:4n6) levels	Weighted median	21	0.148125	0.0442753	0.000821206
RA	1-linoleoyl-2-arachidonoyl-GPC (18:2/20:4n6) levels	Inverse variance weighted	21	0.0812428	0.033912	0.0165888
RA	1-linoleoyl-2-arachidonoyl-GPC (18:2/20:4n6) levels	Simple mode	21	0.0284781	0.115024	0.806979
RA	1-linoleoyl-2-arachidonoyl-GPC (18:2/20:4n6) levels	Weighted mode	21	0.14058	0.0485189	0.00890489
RA	Tetrahydrocortisol glucuronide levels	MR Egger	20	0.0101026	0.205967	0.96142
RA	Tetrahydrocortisol glucuronide levels	Weighted median	20	-0.107173	0.0767744	0.162731
RA	Tetrahydrocortisol glucuronide levels	Inverse variance weighted	20	-0.0838367	0.0586595	0.152944
RA	Tetrahydrocortisol glucuronide levels	Simple mode	20	-0.196198	0.128249	0.14254
RA	Tetrahydrocortisol glucuronide levels	Weighted mode	20	-0.161132	0.117356	0.185736
RA	Myristoleate (14:1n5) levels	MR Egger	10	-0.309792	0.355571	0.409
RA	Myristoleate (14:1n5) levels	Weighted median	10	-0.0910526	0.122158	0.456051
RA	Myristoleate (14:1n5) levels	Inverse variance weighted	10	-0.0585058	0.103849	0.573182
RA	Myristoleate (14:1n5) levels	Simple mode	10	-0.153945	0.181213	0.417613
RA	Myristoleate (14:1n5) levels	Weighted mode	10	-0.140702	0.190686	0.479389
RA	N-acetylasparagine levels	MR Egger	19	0.00124642	0.0277882	0.964746
RA	N-acetylasparagine levels	Weighted median	19	0	0.0236856	1
RA	N-acetylasparagine levels	Inverse variance weighted	19	0.00887914	0.0204202	0.663692
RA	N-acetylasparagine levels	Simple mode	19	0.0237957	0.0651842	0.719326
RA	N-acetylasparagine levels	Weighted mode	19	-0.000787526	0.0233788	0.973499
RA	Palmitoyl dihydrosphingomyelin (d18:0/16:0) levels	MR Egger	28	-0.16553	0.148521	0.275254
RA	Palmitoyl dihydrosphingomyelin (d18:0/16:0) levels	Weighted median	28	0	0.0729565	1
RA	Palmitoyl dihydrosphingomyelin (d18:0/16:0) levels	Inverse variance weighted	28	-0.0208368	0.0496754	0.674881
RA	Palmitoyl dihydrosphingomyelin (d18:0/16:0) levels	Simple mode	28	-0.177694	0.153987	0.258634
RA	Palmitoyl dihydrosphingomyelin (d18:0/16:0) levels	Weighted mode	28	-0.177694	0.149892	0.246158
RA	2,3-dihydroxy-5-methylthio-4-pentenoate (dmtpa) levels	MR Egger	23	0.0538404	0.21543	0.805077
RA	2,3-dihydroxy-5-methylthio-4-pentenoate (dmtpa) levels	Weighted median	23	0.0998649	0.0843438	0.236404
RA	2,3-dihydroxy-5-methylthio-4-pentenoate (dmtpa) levels	Inverse variance weighted	23	0.115144	0.0567121	0.0423236
RA	2,3-dihydroxy-5-methylthio-4-pentenoate (dmtpa) levels	Simple mode	23	0.0368095	0.144686	0.801542
RA	2,3-dihydroxy-5-methylthio-4-pentenoate (dmtpa) levels	Weighted mode	23	0.0627223	0.129933	0.634058
RA	X-12306 levels	MR Egger	19	0.0817874	0.152788	0.599376
RA	X-12306 levels	Weighted median	19	0	0.0764744	1
RA	X-12306 levels	Inverse variance weighted	19	-0.0202702	0.0643001	0.752577
RA	X-12306 levels	Simple mode	19	0.223222	0.139689	0.127449
RA	X-12306 levels	Weighted mode	19	0.00807747	0.0845644	0.924958
RA	Caffeine levels	MR Egger	19	-0.159645	0.14858	0.297627
RA	Caffeine levels	Weighted median	19	0	0.0805414	1
RA	Caffeine levels	Inverse variance weighted	19	-0.00515077	0.0632074	0.935052
RA	Caffeine levels	Simple mode	19	-0.00336578	0.132909	0.980075
RA	Caffeine levels	Weighted mode	19	0.0222102	0.0980145	0.823287
RA	X-12830 levels	MR Egger	20	-0.0571079	0.076214	0.463352
RA	X-12830 levels	Weighted median	20	-0.0303857	0.0506444	0.548518
RA	X-12830 levels	Inverse variance weighted	20	-0.0567633	0.0336271	0.0914069
RA	X-12830 levels	Simple mode	20	-0.0553941	0.0828736	0.511907
RA	X-12830 levels	Weighted mode	20	0.0164896	0.073477	0.824827
RA	Dihomo-linolenate (20:3n3 or n6) levels	MR Egger	15	0.0592098	0.203497	0.775671
RA	Dihomo-linolenate (20:3n3 or n6) levels	Weighted median	15	-0.126658	0.0957694	0.185993
RA	Dihomo-linolenate (20:3n3 or n6) levels	Inverse variance weighted	15	-0.0849483	0.0695361	0.221843
RA	Dihomo-linolenate (20:3n3 or n6) levels	Simple mode	15	-0.161386	0.161726	0.335265
RA	Dihomo-linolenate (20:3n3 or n6) levels	Weighted mode	15	-0.152317	0.131718	0.266874
RA	1-oleoyl-2-linoleoyl-GPE (18:1/18:2) levels	MR Egger	26	-0.0643083	0.0349818	0.0784214
RA	1-oleoyl-2-linoleoyl-GPE (18:1/18:2) levels	Weighted median	26	-0.0804283	0.024988	0.00128783
RA	1-oleoyl-2-linoleoyl-GPE (18:1/18:2) levels	Inverse variance weighted	26	-0.0737533	0.0193831	0.00014178
RA	1-oleoyl-2-linoleoyl-GPE (18:1/18:2) levels	Simple mode	26	-0.175188	0.0675155	0.0156099
RA	1-oleoyl-2-linoleoyl-GPE (18:1/18:2) levels	Weighted mode	26	-0.0825124	0.0218412	0.000874571
RA	Quinolinate levels	MR Egger	17	-0.0471852	0.195961	0.812979
RA	Quinolinate levels	Weighted median	17	0.113208	0.0786753	0.150169
RA	Quinolinate levels	Inverse variance weighted	17	0.184766	0.0649397	0.00443838
RA	Quinolinate levels	Simple mode	17	0.0667967	0.127755	0.608243
RA	Quinolinate levels	Weighted mode	17	0.0707519	0.106939	0.517635
RA	X-19438 levels	MR Egger	16	-0.287062	0.109613	0.0202201
RA	X-19438 levels	Weighted median	16	-0.125155	0.0750003	0.0951711
RA	X-19438 levels	Inverse variance weighted	16	-0.127726	0.0527514	0.0154659
RA	X-19438 levels	Simple mode	16	-0.113184	0.131394	0.402574
RA	X-19438 levels	Weighted mode	16	-0.167213	0.101979	0.121868
RA	Theophylline levels	MR Egger	19	-0.148371	0.0976884	0.147185
RA	Theophylline levels	Weighted median	19	0.0430896	0.0691106	0.532964
RA	Theophylline levels	Inverse variance weighted	19	0.0032543	0.0517012	0.949811
RA	Theophylline levels	Simple mode	19	0.0462159	0.122928	0.711341
RA	Theophylline levels	Weighted mode	19	0.0605451	0.0911232	0.514837
RA	X-13507 levels	MR Egger	11	-0.0614459	0.355027	0.866423
RA	X-13507 levels	Weighted median	11	-0.0333166	0.0943261	0.723934
RA	X-13507 levels	Inverse variance weighted	11	0.00770002	0.101683	0.939637
RA	X-13507 levels	Simple mode	11	-0.0926574	0.13632	0.512118
RA	X-13507 levels	Weighted mode	11	-0.0557995	0.124589	0.663796
RA	Carnitine to propionylcarnitine (C3) ratio	MR Egger	20	-0.171687	0.105419	0.120772
RA	Carnitine to propionylcarnitine (C3) ratio	Weighted median	20	0.000797744	0.0647311	0.990167
RA	Carnitine to propionylcarnitine (C3) ratio	Inverse variance weighted	20	0.00135567	0.0451202	0.976031
RA	Carnitine to propionylcarnitine (C3) ratio	Simple mode	20	0.114039	0.113446	0.327417
RA	Carnitine to propionylcarnitine (C3) ratio	Weighted mode	20	0.101495	0.0996332	0.32115
RA	N-acetyl leucine levels	MR Egger	14	0.00751124	0.225115	0.973931
RA	N-acetyl leucine levels	Weighted median	14	0	0.0734474	1
RA	N-acetyl leucine levels	Inverse variance weighted	14	0.0328267	0.0580677	0.571858
RA	N-acetyl leucine levels	Simple mode	14	-0.0153919	0.111047	0.891885
RA	N-acetyl leucine levels	Weighted mode	14	-0.0176584	0.106885	0.87132
RA	Pregnenolone sulfate levels	MR Egger	26	0.0589947	0.112193	0.60383
RA	Pregnenolone sulfate levels	Weighted median	26	0	0.0639267	1
RA	Pregnenolone sulfate levels	Inverse variance weighted	26	0.0047772	0.0442039	0.913939
RA	Pregnenolone sulfate levels	Simple mode	26	0.0156461	0.100841	0.877944
RA	Pregnenolone sulfate levels	Weighted mode	26	-0.0219792	0.0836034	0.794783
RA	Deoxycholic acid glucuronide levels	MR Egger	22	-0.0732789	0.0741203	0.334646
RA	Deoxycholic acid glucuronide levels	Weighted median	22	-0.0588678	0.0495775	0.235074
RA	Deoxycholic acid glucuronide levels	Inverse variance weighted	22	-0.0614456	0.0413992	0.137751
RA	Deoxycholic acid glucuronide levels	Simple mode	22	-0.123657	0.0983467	0.222429
RA	Deoxycholic acid glucuronide levels	Weighted mode	22	-0.0713415	0.0461434	0.137023
RA	Hexanoylglycine levels	MR Egger	19	-0.114187	0.103714	0.286252
RA	Hexanoylglycine levels	Weighted median	19	-0.0896119	0.0561681	0.110618
RA	Hexanoylglycine levels	Inverse variance weighted	19	-0.017036	0.0439931	0.698577
RA	Hexanoylglycine levels	Simple mode	19	0.0800392	0.126641	0.535323
RA	Hexanoylglycine levels	Weighted mode	19	-0.103012	0.0650805	0.130868
RA	3-hydroxyisobutyrate levels	MR Egger	10	-0.100721	0.23291	0.676839
RA	3-hydroxyisobutyrate levels	Weighted median	10	0.123094	0.093877	0.189781
RA	3-hydroxyisobutyrate levels	Inverse variance weighted	10	0.0599386	0.0949844	0.528017
RA	3-hydroxyisobutyrate levels	Simple mode	10	0.125346	0.124482	0.340266
RA	3-hydroxyisobutyrate levels	Weighted mode	10	0.143366	0.109471	0.222768
RA	X-24328 levels	MR Egger	30	-0.0894286	0.131987	0.503613
RA	X-24328 levels	Weighted median	30	0	0.0611223	1
RA	X-24328 levels	Inverse variance weighted	30	-0.0167996	0.0487557	0.730421
RA	X-24328 levels	Simple mode	30	0.060094	0.101773	0.55945
RA	X-24328 levels	Weighted mode	30	0.0261344	0.0713726	0.716897
RA	Adenosine 5'-diphosphate (ADP) to phosphoethanolamine ratio	MR Egger	17	-0.0256107	0.123078	0.837961
RA	Adenosine 5'-diphosphate (ADP) to phosphoethanolamine ratio	Weighted median	17	0	0.0543117	1
RA	Adenosine 5'-diphosphate (ADP) to phosphoethanolamine ratio	Inverse variance weighted	17	0.0415844	0.038673	0.282249
RA	Adenosine 5'-diphosphate (ADP) to phosphoethanolamine ratio	Simple mode	17	-0.0297761	0.0871382	0.737015
RA	Adenosine 5'-diphosphate (ADP) to phosphoethanolamine ratio	Weighted mode	17	-0.044509	0.0725735	0.548301
RA	Histidine to phosphate ratio	MR Egger	23	-0.103808	0.110194	0.356878
RA	Histidine to phosphate ratio	Weighted median	23	-0.0498839	0.0672115	0.457971
RA	Histidine to phosphate ratio	Inverse variance weighted	23	-0.0397274	0.0480314	0.408172
RA	Histidine to phosphate ratio	Simple mode	23	-0.138517	0.111096	0.225572
RA	Histidine to phosphate ratio	Weighted mode	23	-0.072439	0.0747149	0.342815
RA	X-24295 levels	MR Egger	17	0.0392235	0.150076	0.797371
RA	X-24295 levels	Weighted median	17	-0.125501	0.0804523	0.118773
RA	X-24295 levels	Inverse variance weighted	17	-0.073356	0.059868	0.220464
RA	X-24295 levels	Simple mode	17	-0.224559	0.125415	0.0923067
RA	X-24295 levels	Weighted mode	17	-0.147248	0.0988482	0.155768
RA	1-(1-enyl-oleoyl)-GPE (p-18:1) levels	MR Egger	15	0.245456	0.187311	0.212735
RA	1-(1-enyl-oleoyl)-GPE (p-18:1) levels	Weighted median	15	0	0.0990488	1
RA	1-(1-enyl-oleoyl)-GPE (p-18:1) levels	Inverse variance weighted	15	0.0471258	0.0690559	0.494967
RA	1-(1-enyl-oleoyl)-GPE (p-18:1) levels	Simple mode	15	-0.102272	0.168879	0.554478
RA	1-(1-enyl-oleoyl)-GPE (p-18:1) levels	Weighted mode	15	-0.0673596	0.158718	0.677726
RA	Adenosine 5'-monophosphate (AMP) to valine ratio	MR Egger	14	-0.222121	0.441636	0.624103
RA	Adenosine 5'-monophosphate (AMP) to valine ratio	Weighted median	14	0	0.0985591	1
RA	Adenosine 5'-monophosphate (AMP) to valine ratio	Inverse variance weighted	14	0.0122092	0.09355	0.896163
RA	Adenosine 5'-monophosphate (AMP) to valine ratio	Simple mode	14	-0.060403	0.151796	0.697145
RA	Adenosine 5'-monophosphate (AMP) to valine ratio	Weighted mode	14	-0.022736	0.131449	0.865343
RA	X-18921 levels	MR Egger	11	-0.116764	0.0548102	0.0619879
RA	X-18921 levels	Weighted median	11	-0.0386049	0.0350637	0.2709
RA	X-18921 levels	Inverse variance weighted	11	-0.023777	0.0362802	0.512228
RA	X-18921 levels	Simple mode	11	0.0145114	0.0938986	0.880256
RA	X-18921 levels	Weighted mode	11	-0.0410731	0.0364329	0.285913
RA	Eicosanedioate (C20-DC) levels	MR Egger	11	-0.128904	0.179363	0.490577
RA	Eicosanedioate (C20-DC) levels	Weighted median	11	-0.108166	0.0753679	0.151236
RA	Eicosanedioate (C20-DC) levels	Inverse variance weighted	11	-0.071997	0.0549553	0.190162
RA	Eicosanedioate (C20-DC) levels	Simple mode	11	-0.0989973	0.111685	0.39622
RA	Eicosanedioate (C20-DC) levels	Weighted mode	11	-0.110451	0.0873292	0.234634
RA	Spermidine to ornithine ratio	MR Egger	12	0.154736	0.131246	0.265699
RA	Spermidine to ornithine ratio	Weighted median	12	0.122453	0.0727714	0.0924327
RA	Spermidine to ornithine ratio	Inverse variance weighted	12	0.0747454	0.062373	0.230776
RA	Spermidine to ornithine ratio	Simple mode	12	0.159306	0.124633	0.22749
RA	Spermidine to ornithine ratio	Weighted mode	12	0.149185	0.0830547	0.0999423
RA	Bilirubin (z,z) levels	MR Egger	24	-0.0305833	0.044929	0.503162
RA	Bilirubin (z,z) levels	Weighted median	24	-0.0171932	0.0354279	0.627462
RA	Bilirubin (z,z) levels	Inverse variance weighted	24	-0.00103882	0.0298712	0.972258
RA	Bilirubin (z,z) levels	Simple mode	24	0.125428	0.105359	0.246
RA	Bilirubin (z,z) levels	Weighted mode	24	-0.0177702	0.0353941	0.620393
RA	Ornithine levels	MR Egger	22	-0.0118466	0.149326	0.937556
RA	Ornithine levels	Weighted median	22	0	0.0763283	1
RA	Ornithine levels	Inverse variance weighted	22	-0.00766392	0.056892	0.892841
RA	Ornithine levels	Simple mode	22	0.0144987	0.136627	0.916495
RA	Ornithine levels	Weighted mode	22	0.0606414	0.124097	0.630146
RA	Alpha-ketoglutarate to aspartate ratio	MR Egger	21	-0.0356625	0.113518	0.756824
RA	Alpha-ketoglutarate to aspartate ratio	Weighted median	21	0	0.0585649	1
RA	Alpha-ketoglutarate to aspartate ratio	Inverse variance weighted	21	-0.00540129	0.0412633	0.895856
RA	Alpha-ketoglutarate to aspartate ratio	Simple mode	21	-0.0232513	0.095762	0.810631
RA	Alpha-ketoglutarate to aspartate ratio	Weighted mode	21	-0.0102534	0.0534352	0.849768
RA	N-acetylarginine levels	MR Egger	26	-0.00146452	0.0289001	0.960004
RA	N-acetylarginine levels	Weighted median	26	-0.00335517	0.0243404	0.890364
RA	N-acetylarginine levels	Inverse variance weighted	26	0.00293137	0.0203343	0.885375
RA	N-acetylarginine levels	Simple mode	26	-0.0673974	0.0646557	0.3072
RA	N-acetylarginine levels	Weighted mode	26	-0.0056998	0.0235845	0.811003
RA	3-hydroxy-2-methylpyridine sulfate levels	MR Egger	15	-0.134181	0.228553	0.5672
RA	3-hydroxy-2-methylpyridine sulfate levels	Weighted median	15	0.150759	0.113236	0.183071
RA	3-hydroxy-2-methylpyridine sulfate levels	Inverse variance weighted	15	0.0637803	0.090269	0.479841
RA	3-hydroxy-2-methylpyridine sulfate levels	Simple mode	15	0.184204	0.19046	0.349877
RA	3-hydroxy-2-methylpyridine sulfate levels	Weighted mode	15	0.180216	0.153666	0.260455
RA	X-24585 levels	MR Egger	13	-0.0442198	0.229862	0.850954
RA	X-24585 levels	Weighted median	13	0.133785	0.0849432	0.115258
RA	X-24585 levels	Inverse variance weighted	13	0.0920375	0.0672449	0.171096
RA	X-24585 levels	Simple mode	13	0.15431	0.128437	0.252753
RA	X-24585 levels	Weighted mode	13	0.156778	0.102503	0.152064
RA	Phenylalanine levels	MR Egger	14	0.0938792	0.212657	0.666731
RA	Phenylalanine levels	Weighted median	14	-0.115219	0.0905429	0.203185
RA	Phenylalanine levels	Inverse variance weighted	14	-0.170596	0.0718152	0.017526
RA	Phenylalanine levels	Simple mode	14	-0.0432509	0.168006	0.800871
RA	Phenylalanine levels	Weighted mode	14	0.00843634	0.156536	0.957839
RA	Octadecadienedioate (C18:2-DC) levels	MR Egger	25	-0.044276	0.0467116	0.353055
RA	Octadecadienedioate (C18:2-DC) levels	Weighted median	25	-0.0308951	0.0342753	0.367386
RA	Octadecadienedioate (C18:2-DC) levels	Inverse variance weighted	25	-0.00946021	0.0302995	0.754871
RA	Octadecadienedioate (C18:2-DC) levels	Simple mode	25	0.0709813	0.0874961	0.425194
RA	Octadecadienedioate (C18:2-DC) levels	Weighted mode	25	-0.0213831	0.0328931	0.521816
RA	X-24306 levels	MR Egger	17	-0.0579509	0.186381	0.760136
RA	X-24306 levels	Weighted median	17	0.0885579	0.0782526	0.257764
RA	X-24306 levels	Inverse variance weighted	17	0.0966702	0.0566925	0.0881635
RA	X-24306 levels	Simple mode	17	0.0814888	0.147189	0.587483
RA	X-24306 levels	Weighted mode	17	0.0872016	0.150416	0.570167
RA	C-glycosyltryptophan levels	MR Egger	25	0.0143386	0.177248	0.936225
RA	C-glycosyltryptophan levels	Weighted median	25	-0.0301708	0.079368	0.703843
RA	C-glycosyltryptophan levels	Inverse variance weighted	25	-0.0672871	0.0615336	0.274174
RA	C-glycosyltryptophan levels	Simple mode	25	-0.0158851	0.132363	0.905472
RA	C-glycosyltryptophan levels	Weighted mode	25	-0.0210126	0.0990283	0.833752
RA	Nicotinamide levels	MR Egger	20	-0.153891	0.143127	0.296487
RA	Nicotinamide levels	Weighted median	20	-0.101025	0.0698441	0.148054
RA	Nicotinamide levels	Inverse variance weighted	20	-0.0610219	0.0502943	0.225017
RA	Nicotinamide levels	Simple mode	20	-0.0811328	0.11536	0.490399
RA	Nicotinamide levels	Weighted mode	20	-0.087848	0.0881343	0.331411
RA	Trans-urocanate levels	MR Egger	16	0.00725729	0.0943293	0.939763
RA	Trans-urocanate levels	Weighted median	16	0.0138164	0.0482112	0.774433
RA	Trans-urocanate levels	Inverse variance weighted	16	0.0478347	0.0462582	0.301099
RA	Trans-urocanate levels	Simple mode	16	0.0950798	0.113886	0.416892
RA	Trans-urocanate levels	Weighted mode	16	0.00580037	0.0492582	0.907824
RA	Glycerol to sulfate ratio	MR Egger	18	0.0659574	0.171093	0.704939
RA	Glycerol to sulfate ratio	Weighted median	18	0.00546537	0.0817245	0.946681
RA	Glycerol to sulfate ratio	Inverse variance weighted	18	0.073986	0.0604658	0.221103
RA	Glycerol to sulfate ratio	Simple mode	18	-0.0725914	0.148165	0.630441
RA	Glycerol to sulfate ratio	Weighted mode	18	0.0637061	0.124291	0.614856
RA	X-15461 levels	MR Egger	23	-0.0208525	0.205848	0.920273
RA	X-15461 levels	Weighted median	23	0.0153847	0.0685722	0.82248
RA	X-15461 levels	Inverse variance weighted	23	0.118564	0.0724649	0.101807
RA	X-15461 levels	Simple mode	23	0.0136531	0.12928	0.91685
RA	X-15461 levels	Weighted mode	23	0.0386868	0.099953	0.702438
RA	3-hydroxydecanoate levels	MR Egger	12	-0.184814	0.153828	0.257266
RA	3-hydroxydecanoate levels	Weighted median	12	-0.0950671	0.0645093	0.140563
RA	3-hydroxydecanoate levels	Inverse variance weighted	12	-0.120578	0.0652052	0.0644276
RA	3-hydroxydecanoate levels	Simple mode	12	-0.0261107	0.148082	0.863242
RA	3-hydroxydecanoate levels	Weighted mode	12	-0.081524	0.0659387	0.242073
RA	X-26111 levels	MR Egger	12	-0.0573052	0.120027	0.643314
RA	X-26111 levels	Weighted median	12	-0.0457257	0.0594484	0.441794
RA	X-26111 levels	Inverse variance weighted	12	-0.0471562	0.0578466	0.414961
RA	X-26111 levels	Simple mode	12	-0.25858	0.136724	0.0852016
RA	X-26111 levels	Weighted mode	12	-0.0462607	0.0638407	0.48381
RA	X-12411 levels	MR Egger	11	-0.0145328	0.17205	0.934533
RA	X-12411 levels	Weighted median	11	-0.0416795	0.0926434	0.652789
RA	X-12411 levels	Inverse variance weighted	11	-0.102699	0.07196	0.15353
RA	X-12411 levels	Simple mode	11	-0.0713685	0.146965	0.637703
RA	X-12411 levels	Weighted mode	11	-0.0487366	0.119951	0.693078
RA	Cortolone glucuronide (1) levels	MR Egger	20	-0.151047	0.175629	0.401078
RA	Cortolone glucuronide (1) levels	Weighted median	20	-0.0833712	0.0822591	0.310812
RA	Cortolone glucuronide (1) levels	Inverse variance weighted	20	-0.0664994	0.0644313	0.302027
RA	Cortolone glucuronide (1) levels	Simple mode	20	-0.0601668	0.125927	0.638249
RA	Cortolone glucuronide (1) levels	Weighted mode	20	-0.0849059	0.102237	0.416581
RA	2-hydroxyarachidate levels	MR Egger	20	0.210547	0.164517	0.216868
RA	2-hydroxyarachidate levels	Weighted median	20	0	0.0811278	1
RA	2-hydroxyarachidate levels	Inverse variance weighted	20	0.0414836	0.0650917	0.523923
RA	2-hydroxyarachidate levels	Simple mode	20	0.13938	0.147875	0.35774
RA	2-hydroxyarachidate levels	Weighted mode	20	0.13938	0.136428	0.319784
RA	Glycine to pyridoxal ratio	MR Egger	11	-0.108858	0.148488	0.482147
RA	Glycine to pyridoxal ratio	Weighted median	11	-0.0927758	0.0641559	0.148149
RA	Glycine to pyridoxal ratio	Inverse variance weighted	11	-0.0252048	0.0840796	0.76435
RA	Glycine to pyridoxal ratio	Simple mode	11	-0.0310851	0.159042	0.848954
RA	Glycine to pyridoxal ratio	Weighted mode	11	-0.117689	0.0663198	0.10636
RA	Xanthurenate levels	MR Egger	22	0.0287322	0.138651	0.837928
RA	Xanthurenate levels	Weighted median	22	-0.0692896	0.0594491	0.243806
RA	Xanthurenate levels	Inverse variance weighted	22	-0.00947562	0.0434149	0.827229
RA	Xanthurenate levels	Simple mode	22	-0.0926734	0.0893142	0.311252
RA	Xanthurenate levels	Weighted mode	22	-0.0715116	0.0549442	0.207175
RA	N-carbamoylalanine levels	MR Egger	18	0.364912	0.154555	0.031245
RA	N-carbamoylalanine levels	Weighted median	18	0.184288	0.0726238	0.0111626
RA	N-carbamoylalanine levels	Inverse variance weighted	18	0.128387	0.0510602	0.0119225
RA	N-carbamoylalanine levels	Simple mode	18	0.218336	0.123359	0.0946733
RA	N-carbamoylalanine levels	Weighted mode	18	0.206725	0.114786	0.0894748
RA	Xylose levels	MR Egger	22	-0.0535421	0.108729	0.627774
RA	Xylose levels	Weighted median	22	0	0.0661325	1
RA	Xylose levels	Inverse variance weighted	22	0.00490759	0.0478711	0.918346
RA	Xylose levels	Simple mode	22	0.0387362	0.0952492	0.688356
RA	Xylose levels	Weighted mode	22	0.0228491	0.0838525	0.787906
RA	N-stearoyl-sphingadienine (d18:2/18:0) levels	MR Egger	12	-0.111389	0.13563	0.430635
RA	N-stearoyl-sphingadienine (d18:2/18:0) levels	Weighted median	12	-0.082827	0.0683576	0.225638
RA	N-stearoyl-sphingadienine (d18:2/18:0) levels	Inverse variance weighted	12	0.00611607	0.0564789	0.913766
RA	N-stearoyl-sphingadienine (d18:2/18:0) levels	Simple mode	12	0.112539	0.1011	0.289379
RA	N-stearoyl-sphingadienine (d18:2/18:0) levels	Weighted mode	12	-0.102784	0.0747019	0.196212
RA	Caffeine to theophylline ratio	MR Egger	18	-0.190267	0.134574	0.17657
RA	Caffeine to theophylline ratio	Weighted median	18	0	0.0685434	1
RA	Caffeine to theophylline ratio	Inverse variance weighted	18	-0.0106938	0.0535482	0.841712
RA	Caffeine to theophylline ratio	Simple mode	18	0.0296004	0.107952	0.787235
RA	Caffeine to theophylline ratio	Weighted mode	18	0.0296004	0.0733806	0.691695
RA	Arginine to phosphate ratio	MR Egger	18	0.100429	0.166051	0.553788
RA	Arginine to phosphate ratio	Weighted median	18	0.0882074	0.0760078	0.245843
RA	Arginine to phosphate ratio	Inverse variance weighted	18	0.0654233	0.0572034	0.25275
RA	Arginine to phosphate ratio	Simple mode	18	0.00107303	0.134036	0.993706
RA	Arginine to phosphate ratio	Weighted mode	18	0.0682759	0.107692	0.534526
RA	Caffeine to theobromine ratio	MR Egger	16	-0.290488	0.213949	0.196028
RA	Caffeine to theobromine ratio	Weighted median	16	0.00193408	0.101428	0.984786
RA	Caffeine to theobromine ratio	Inverse variance weighted	16	-0.00589669	0.0812122	0.942118
RA	Caffeine to theobromine ratio	Simple mode	16	0.205691	0.169786	0.244455
RA	Caffeine to theobromine ratio	Weighted mode	16	0.186876	0.161695	0.26587
RA	1-stearoyl-2-linoleoyl-GPE (18:0/18:2) levels	MR Egger	23	-0.0852753	0.0542908	0.131195
RA	1-stearoyl-2-linoleoyl-GPE (18:0/18:2) levels	Weighted median	23	-0.0689146	0.0351653	0.0500271
RA	1-stearoyl-2-linoleoyl-GPE (18:0/18:2) levels	Inverse variance weighted	23	-0.0699897	0.0252691	0.00560957
RA	1-stearoyl-2-linoleoyl-GPE (18:0/18:2) levels	Simple mode	23	0.0594645	0.0712963	0.413219
RA	1-stearoyl-2-linoleoyl-GPE (18:0/18:2) levels	Weighted mode	23	-0.0756766	0.025077	0.0063283
RA	Sphingosine 1-phosphate levels	MR Egger	15	0.0660649	0.245968	0.792459
RA	Sphingosine 1-phosphate levels	Weighted median	15	0.038844	0.0924352	0.674318
RA	Sphingosine 1-phosphate levels	Inverse variance weighted	15	0.0442695	0.0708419	0.532033
RA	Sphingosine 1-phosphate levels	Simple mode	15	0.0532949	0.138451	0.706069
RA	Sphingosine 1-phosphate levels	Weighted mode	15	0.0479723	0.124329	0.705409
RA	Acetylcarnitine levels (Biocrates platform)	MR Egger	12	-0.140804	0.153829	0.38156
RA	Acetylcarnitine levels (Biocrates platform)	Weighted median	12	-0.0498939	0.0836239	0.550743
RA	Acetylcarnitine levels (Biocrates platform)	Inverse variance weighted	12	-0.0598803	0.0637605	0.347657
RA	Acetylcarnitine levels (Biocrates platform)	Simple mode	12	-0.0383075	0.109561	0.733208
RA	Acetylcarnitine levels (Biocrates platform)	Weighted mode	12	-0.0456698	0.0948576	0.639627
RA	Linoleoyl-arachidonoyl-glycerol (18:2/20:4) [2] levels	MR Egger	30	0.0456262	0.0850045	0.59568
RA	Linoleoyl-arachidonoyl-glycerol (18:2/20:4) [2] levels	Weighted median	30	0.074359	0.0417078	0.07461
RA	Linoleoyl-arachidonoyl-glycerol (18:2/20:4) [2] levels	Inverse variance weighted	30	0.0158383	0.0403746	0.694849
RA	Linoleoyl-arachidonoyl-glycerol (18:2/20:4) [2] levels	Simple mode	30	0.0358451	0.0896812	0.69231
RA	Linoleoyl-arachidonoyl-glycerol (18:2/20:4) [2] levels	Weighted mode	30	0.0859027	0.0402982	0.0416325
RA	Ribitol levels	MR Egger	27	-0.0580735	0.0734513	0.436591
RA	Ribitol levels	Weighted median	27	-0.0213921	0.0604135	0.723267
RA	Ribitol levels	Inverse variance weighted	27	-0.0108395	0.0436462	0.803865
RA	Ribitol levels	Simple mode	27	-0.0317341	0.114535	0.783918
RA	Ribitol levels	Weighted mode	27	-0.0228546	0.0589765	0.701526
RA	Adenosine 5'-monophosphate (AMP) to tryptophan ratio	MR Egger	23	-0.153611	0.173963	0.387228
RA	Adenosine 5'-monophosphate (AMP) to tryptophan ratio	Weighted median	23	-0.131214	0.0738375	0.0755572
RA	Adenosine 5'-monophosphate (AMP) to tryptophan ratio	Inverse variance weighted	23	-0.0400811	0.0611367	0.512083
RA	Adenosine 5'-monophosphate (AMP) to tryptophan ratio	Simple mode	23	-0.177	0.133876	0.199713
RA	Adenosine 5'-monophosphate (AMP) to tryptophan ratio	Weighted mode	23	-0.172516	0.107928	0.124212
RA	5-oxoproline to citrate ratio	MR Egger	16	-0.0260349	0.0536297	0.634861
RA	5-oxoproline to citrate ratio	Weighted median	16	0	0.0446376	1
RA	5-oxoproline to citrate ratio	Inverse variance weighted	16	0.0349208	0.0365388	0.339215
RA	5-oxoproline to citrate ratio	Simple mode	16	0.142357	0.117264	0.24352
RA	5-oxoproline to citrate ratio	Weighted mode	16	0.00262861	0.0491218	0.95803
RA	Homoarginine levels	MR Egger	22	-0.0102064	0.0718091	0.888397
RA	Homoarginine levels	Weighted median	22	-0.0137552	0.0510956	0.787771
RA	Homoarginine levels	Inverse variance weighted	22	0.0069237	0.0374258	0.853231
RA	Homoarginine levels	Simple mode	22	0.0290557	0.10532	0.785337
RA	Homoarginine levels	Weighted mode	22	-0.00634207	0.0502837	0.900832
RA	3-phenylpropionate hydrocinnamate levels	MR Egger	17	0.307709	0.185877	0.118601
RA	3-phenylpropionate hydrocinnamate levels	Weighted median	17	0.0546113	0.0903518	0.545558
RA	3-phenylpropionate hydrocinnamate levels	Inverse variance weighted	17	0.052692	0.061603	0.392359
RA	3-phenylpropionate hydrocinnamate levels	Simple mode	17	0.0986681	0.129757	0.458072
RA	3-phenylpropionate hydrocinnamate levels	Weighted mode	17	0.130562	0.132602	0.339467
RA	1,3-dimethylurate levels	MR Egger	23	-0.121501	0.172397	0.488692
RA	1,3-dimethylurate levels	Weighted median	23	-0.126232	0.070626	0.0738843
RA	1,3-dimethylurate levels	Inverse variance weighted	23	-0.0828236	0.0541838	0.126372
RA	1,3-dimethylurate levels	Simple mode	23	-0.254629	0.139008	0.0805631
RA	1,3-dimethylurate levels	Weighted mode	23	-0.178573	0.129029	0.180247
RA	1-stearoyl-2-arachidonoyl-gpc (18:0/20:4) levels	MR Egger	28	0.0851392	0.037976	0.0337184
RA	1-stearoyl-2-arachidonoyl-gpc (18:0/20:4) levels	Weighted median	28	0.0787783	0.0228477	0.000564797
RA	1-stearoyl-2-arachidonoyl-gpc (18:0/20:4) levels	Inverse variance weighted	28	0.0654196	0.0271044	0.0157953
RA	1-stearoyl-2-arachidonoyl-gpc (18:0/20:4) levels	Simple mode	28	0.173056	0.0861119	0.0545577
RA	1-stearoyl-2-arachidonoyl-gpc (18:0/20:4) levels	Weighted mode	28	0.0825905	0.0223726	0.00099479
RA	Campesterol levels	MR Egger	17	-0.0965774	0.0583538	0.118685
RA	Campesterol levels	Weighted median	17	-0.0197297	0.0381601	0.605138
RA	Campesterol levels	Inverse variance weighted	17	0.0251469	0.0306137	0.411402
[truncated: 8,651 more rows]

## Sheet: Table 6
Supplementary Table 6: The SNPs used for MR analysis.
SNP	effect_allele.exposure	other_allele.exposure	effect_allele.outcome	other_allele.outcome	beta.exposure	beta.outcome	eaf.exposure	eaf.outcome	remove	palindromic	ambiguous	id.outcome	chr.outcome	pos.outcome	pval.outcome	se.outcome	samplesize.outcome	outcome	mr_keep.outcome	pval_origin.outcome	chr.exposure	pos.exposure	se.exposure	pval.exposure	samplesize.exposure	exposure	mr_keep.exposure	pval_origin.exposure	id.exposure	R2	F	action	SNP_index	mr_keep
rs10000291	T	C	T	C	0.0954508	0	0.377733	NA	FALSE	FALSE	FALSE	EBI-a-GCST002318	4	171034742	0.8	0.015081	57284	EBI-a-GCST002318	TRUE	reported	4	170113591	0.0151521	2.98559e-10	8256	3-formylindole levels	TRUE	reported	xoPuMf	0.00478367	39.6742	2	1	TRUE
rs1007889	G	T	G	T	0.0741001	0.0202027	0.331625	NA	FALSE	FALSE	FALSE	EBI-a-GCST002318	22	24239243	0.31	0.0158625	57284	EBI-a-GCST002318	TRUE	reported	22	23897056	0.0155021	1.75304e-06	8256	3-formylindole levels	TRUE	reported	xoPuMf	0.00275986	22.8429	2	1	TRUE
rs10839612	T	C	T	C	0.0651796	0	0.51448	NA	FALSE	FALSE	FALSE	EBI-a-GCST002318	11	6782438	0.89	0.015081	57284	EBI-a-GCST002318	TRUE	reported	11	6761207	0.0145466	7.4379e-06	8256	3-formylindole levels	TRUE	reported	xoPuMf	0.00242592	20.0722	2	1	TRUE
rs11056372	A	G	A	G	-0.165652	-0.040822	0.0441194	NA	FALSE	FALSE	FALSE	EBI-a-GCST002318	12	15302837	0.42	0.0505566	57284	EBI-a-GCST002318	TRUE	reported	12	15149903	0.035379	2.83795e-06	8256	3-formylindole levels	TRUE	reported	xoPuMf	0.00264838	21.9178	2	1	TRUE
rs11647808	A	C	A	C	0.177857	0.00995033	0.0790336	NA	FALSE	FALSE	FALSE	EBI-a-GCST002318	16	58770881	0.82	0.0341891	57284	EBI-a-GCST002318	TRUE	reported	16	58736977	0.026839	3.42996e-11	8256	3-formylindole levels	TRUE	reported	xoPuMf	0.00529097	43.904	2	1	TRUE
rs1165211	C	T	C	T	0.0995025	0.0100503	0.301662	NA	FALSE	FALSE	FALSE	EBI-a-GCST002318	6	25800922	0.450001	0.0156998	57284	EBI-a-GCST002318	TRUE	reported	6	25800694	0.015874	3.65099e-10	8256	3-formylindole levels	TRUE	reported	xoPuMf	0.00473657	39.2817	2	1	TRUE
rs1230319	G	A	G	A	-0.198879	0.0833816	0.971829	NA	FALSE	FALSE	FALSE	EBI-a-GCST002318	6	163898797	0.23	0.0713071	57284	EBI-a-GCST002318	TRUE	reported	6	163477765	0.0448536	9.25219e-06	8256	3-formylindole levels	TRUE	reported	xoPuMf	0.00237564	19.6552	2	1	TRUE
rs13056495	T	C	T	C	-0.0923429	0.00995033	0.142201	NA	FALSE	FALSE	FALSE	EBI-a-GCST002318	22	24774418	0.7	0.029443	57284	EBI-a-GCST002318	TRUE	reported	22	24378450	0.0208025	9.03645e-06	8256	3-formylindole levels	TRUE	reported	xoPuMf	0.00238106	19.7002	2	1	TRUE
rs13220495	T	C	T	C	-0.11514	0.0392207	0.0870224	NA	FALSE	FALSE	FALSE	EBI-a-GCST002318	6	26441640	0.15	0.0286171	57284	EBI-a-GCST002318	TRUE	reported	6	26441412	0.0256205	6.98831e-06	8256	3-formylindole levels	TRUE	reported	xoPuMf	0.00244032	20.1917	2	1	TRUE
rs1431143	G	A	G	A	0.0730795	0.0100503	0.708171	NA	FALSE	FALSE	FALSE	EBI-a-GCST002318	1	190935277	0.719999	0.0156998	57284	EBI-a-GCST002318	TRUE	reported	1	190966147	0.0159185	4.41412e-06	8256	3-formylindole levels	TRUE	reported	xoPuMf	0.0025463	21.0708	2	1	TRUE
rs149767042	A	G	A	G	0.214721	-0.105361	0.0237342	NA	FALSE	FALSE	FALSE	EBI-a-GCST002318	2	234520774	0.28	0.0930212	57284	EBI-a-GCST002318	TRUE	reported	2	233612128	0.0478784	7.3014e-06	8256	3-formylindole levels	TRUE	reported	xoPuMf	0.00243021	20.1078	2	1	TRUE
rs2517664	T	C	T	C	-0.0940444	0.0582689	0.167234	NA	FALSE	FALSE	FALSE	EBI-a-GCST002318	6	30073259	0.000790005	0.0188986	57284	EBI-a-GCST002318	TRUE	reported	6	30105482	0.0194602	1.34728e-06	8256	3-formylindole levels	TRUE	reported	xoPuMf	0.00282082	23.3489	2	1	TRUE
rs2977995	G	A	G	A	0.275053	0.0202027	0.747545	NA	FALSE	FALSE	FALSE	EBI-a-GCST002318	9	131584245	0.2	0.0212616	57284	EBI-a-GCST002318	TRUE	reported	9	128821966	0.0164742	1.403e-62	8256	3-formylindole levels	TRUE	reported	xoPuMf	0.0326613	278.688	2	1	TRUE
rs34396849	C	A	C	A	-0.136057	0.040822	0.0929654	NA	FALSE	FALSE	FALSE	EBI-a-GCST002318	6	28250955	0.12	0.0272901	57284	EBI-a-GCST002318	TRUE	reported	6	28283178	0.0248241	4.23326e-08	8256	3-formylindole levels	TRUE	reported	xoPuMf	0.00362533	30.0324	2	1	TRUE
rs34546498	T	C	T	C	-0.11784	0.0392207	0.0872862	NA	FALSE	FALSE	FALSE	EBI-a-GCST002318	6	26961280	0.24	0.0332343	57284	EBI-a-GCST002318	TRUE	reported	6	26993501	0.0255944	4.14176e-06	8256	3-formylindole levels	TRUE	reported	xoPuMf	0.00256102	21.1929	2	1	TRUE
rs35715914	T	C	T	C	-0.126745	0.0295588	0.0910745	NA	FALSE	FALSE	FALSE	EBI-a-GCST002318	6	27592003	0.23	0.0288872	57284	EBI-a-GCST002318	TRUE	reported	6	27624224	0.0250227	4.08003e-07	8256	3-formylindole levels	TRUE	reported	xoPuMf	0.00309796	25.65	2	1	TRUE
rs437955	C	T	C	T	-0.123569	0.0512933	0.10377	NA	FALSE	FALSE	FALSE	EBI-a-GCST002318	6	29375802	0.0669993	0.0275853	57284	EBI-a-GCST002318	TRUE	reported	6	29408025	0.0237056	1.86168e-07	8256	3-formylindole levels	TRUE	reported	xoPuMf	0.00328035	27.1651	2	1	TRUE
rs4444498	T	C	T	C	-0.268342	0.0487902	0.0148831	NA	FALSE	FALSE	FALSE	EBI-a-GCST002318	2	217811188	0.79	0.19208	57284	EBI-a-GCST002318	TRUE	reported	2	216946465	0.0598574	7.3596e-06	8256	3-formylindole levels	TRUE	reported	xoPuMf	0.00242838	20.0926	2	1	TRUE
rs4502257	T	C	T	C	0.148732	-0.0100503	0.0497817	NA	FALSE	FALSE	FALSE	EBI-a-GCST002318	17	64413396	0.82	0.0348568	57284	EBI-a-GCST002318	TRUE	reported	17	66417278	0.0331573	7.2696e-06	8256	3-formylindole levels	TRUE	reported	xoPuMf	0.00243122	20.1162	2	1	TRUE
rs510402	A	G	A	G	-0.195605	0.0198026	0.0332808	NA	FALSE	FALSE	FALSE	EBI-a-GCST002318	3	8175740	0.67	0.0567478	57284	EBI-a-GCST002318	TRUE	reported	3	8134053	0.0401108	1.07919e-06	8256	3-formylindole levels	TRUE	reported	xoPuMf	0.00287222	23.7756	2	1	TRUE
rs55973025	A	G	A	G	-0.11599	0.0198026	0.0857715	NA	FALSE	FALSE	FALSE	EBI-a-GCST002318	15	26823199	0.51	0.0338648	57284	EBI-a-GCST002318	TRUE	reported	15	26578052	0.0260638	8.57847e-06	8256	3-formylindole levels	TRUE	reported	xoPuMf	0.00239307	19.7998	2	1	TRUE
rs5751777	T	C	T	C	0.382782	-0.0202027	0.590567	NA	FALSE	FALSE	FALSE	EBI-a-GCST002318	22	24267047	0.27	0.0153842	57284	EBI-a-GCST002318	TRUE	reported	22	23924860	0.0141867	2.41856e-160	8256	3-formylindole levels	TRUE	reported	xoPuMf	0.0810345	727.839	2	1	TRUE
rs57909274	A	C	A	C	-0.0772349	-0.040822	0.240042	NA	FALSE	FALSE	FALSE	EBI-a-GCST002318	8	135240795	0.0860003	0.0259042	57284	EBI-a-GCST002318	TRUE	reported	8	134228552	0.0170737	6.0791e-06	8256	3-formylindole levels	TRUE	reported	xoPuMf	0.00247245	20.4582	2	1	TRUE
rs58487738	A	G	A	G	0.163359	-0.0100503	0.0475669	NA	FALSE	FALSE	FALSE	EBI-a-GCST002318	7	146050136	0.91	0.0490959	57284	EBI-a-GCST002318	TRUE	reported	7	146353044	0.0340601	1.617e-06	8256	3-formylindole levels	TRUE	reported	xoPuMf	0.00277854	22.9979	2	1	TRUE
rs678624	A	G	A	G	0.0764794	-0.0202027	0.744319	NA	FALSE	FALSE	FALSE	EBI-a-GCST002318	17	75245309	0.43	0.0253885	57284	EBI-a-GCST002318	TRUE	reported	17	77249227	0.0165692	3.91669e-06	8256	3-formylindole levels	TRUE	reported	xoPuMf	0.00257393	21.3001	2	1	TRUE
rs72674255	C	T	C	T	0.262222	0.0100503	0.0214702	NA	FALSE	FALSE	FALSE	EBI-a-GCST002318	14	38066052	0.9	0.0838281	57284	EBI-a-GCST002318	TRUE	reported	14	37596847	0.0502074	1.76249e-07	8256	3-formylindole levels	TRUE	reported	xoPuMf	0.00329307	27.2708	2	1	TRUE
rs73141535	C	T	C	T	0.0906226	-0.00995033	0.154104	NA	FALSE	FALSE	FALSE	EBI-a-GCST002318	3	85652697	0.630001	0.0206171	57284	EBI-a-GCST002318	TRUE	reported	3	85603547	0.0203134	8.1492e-06	8256	3-formylindole levels	TRUE	reported	xoPuMf	0.00240487	19.8977	2	1	TRUE
rs76466844	C	T	C	T	0.232961	-0.0295588	0.0200874	NA	FALSE	FALSE	FALSE	EBI-a-GCST002318	2	119420722	0.88	0.175648	57284	EBI-a-GCST002318	TRUE	reported	2	118663146	0.05168	6.55184e-06	8256	3-formylindole levels	TRUE	reported	xoPuMf	0.00245518	20.315	2	1	TRUE
rs77599898	A	G	A	G	0.160659	0	0.0418537	NA	FALSE	FALSE	FALSE	EBI-a-GCST002318	16	9904728	0.96	0.0757245	57284	EBI-a-GCST002318	TRUE	reported	16	9810871	0.0360271	8.21922e-06	8256	3-formylindole levels	TRUE	reported	xoPuMf	0.00240291	19.8814	2	1	TRUE
rs77904614	G	A	G	A	-0.105802	0.0100503	0.110707	NA	FALSE	FALSE	FALSE	EBI-a-GCST002318	12	132216344	0.709999	0.0210423	57284	EBI-a-GCST002318	TRUE	reported	12	131731799	0.0233965	6.12257e-06	8256	3-formylindole levels	TRUE	reported	xoPuMf	0.00247082	20.4447	2	1	TRUE
rs7842755	C	A	C	A	0.084209	0	0.181997	NA	FALSE	FALSE	FALSE	EBI-a-GCST002318	8	6749770	0.88	0.0155404	57284	EBI-a-GCST002318	TRUE	reported	8	6892248	0.0189131	8.49049e-06	8256	3-formylindole levels	TRUE	reported	xoPuMf	0.00239541	19.8192	2	1	TRUE
rs10212037	A	G	A	G	0.141588	-0.0202027	0.0472388	NA	FALSE	FALSE	FALSE	EBI-a-GCST002318	22	26438107	0.38	0.0253885	57284	EBI-a-GCST002318	TRUE	reported	22	26042141	0.0317246	8.08096e-06	8235	Glycerol to carnitine ratio	TRUE	reported	MLyg4F	0.00241295	19.9138	2	1	TRUE
rs11107955	T	C	T	C	-0.112289	-0.0202027	0.0983696	NA	FALSE	FALSE	FALSE	EBI-a-GCST002318	12	95649952	0.4	0.0204109	57284	EBI-a-GCST002318	TRUE	reported	12	95256176	0.0226006	6.74978e-07	8235	Glycerol to carnitine ratio	TRUE	reported	MLyg4F	0.00298862	24.6791	2	1	TRUE
rs116820418	T	C	T	C	0.234256	-0.0304592	0.0192237	NA	FALSE	FALSE	FALSE	EBI-a-GCST002318	1	112622702	0.709999	0.0823916	57284	EBI-a-GCST002318	TRUE	reported	1	112080080	0.0494205	2.1365e-06	8235	Glycerol to carnitine ratio	TRUE	reported	MLyg4F	0.00272095	22.4627	2	1	TRUE
rs117127331	T	C	T	C	-0.0915435	0.0487902	0.126645	NA	FALSE	FALSE	FALSE	EBI-a-GCST002318	6	148789059	0.0439997	0.0237347	57284	EBI-a-GCST002318	TRUE	reported	6	148467923	0.0201292	5.42135e-06	8235	Glycerol to carnitine ratio	TRUE	reported	MLyg4F	0.00250524	20.6774	2	1	TRUE
rs1171616	T	G	T	G	-0.118696	-0.0100503	0.770884	NA	FALSE	FALSE	FALSE	EBI-a-GCST002318	10	61468589	0.6	0.0251383	57284	EBI-a-GCST002318	TRUE	reported	10	59708831	0.0163384	3.73543e-13	8235	Glycerol to carnitine ratio	TRUE	reported	MLyg4F	0.00636818	52.7652	2	1	TRUE
rs12505581	G	A	G	A	0.111117	0.0202027	0.0949506	NA	FALSE	FALSE	FALSE	EBI-a-GCST002318	4	152948812	0.44	0.0212616	57284	EBI-a-GCST002318	TRUE	reported	4	152027660	0.0229816	1.33108e-06	8235	Glycerol to carnitine ratio	TRUE	reported	MLyg4F	0.00283078	23.372	2	1	TRUE
rs1632215	A	G	A	G	-0.0648507	-0.0100503	0.659275	NA	FALSE	FALSE	FALSE	EBI-a-GCST002318	13	27311246	0.53	0.0152311	57284	EBI-a-GCST002318	TRUE	reported	13	26737109	0.0145924	8.8245e-06	8235	Glycerol to carnitine ratio	TRUE	reported	MLyg4F	0.00239261	19.7456	2	1	TRUE
rs184286424	A	C	A	C	-0.224617	0.0487902	0.0181918	NA	FALSE	FALSE	FALSE	EBI-a-GCST002318	4	65540400	0.74	0.143119	57284	EBI-a-GCST002318	TRUE	reported	4	64674682	0.0502389	7.78633e-06	8235	Glycerol to carnitine ratio	TRUE	reported	MLyg4F	0.00242152	19.9848	2	1	TRUE
rs1888859	G	T	G	T	0.0614912	-0.00995033	0.49314	NA	FALSE	FALSE	FALSE	EBI-a-GCST002318	9	12921644	0.55	0.0153842	57284	EBI-a-GCST002318	TRUE	reported	9	12921645	0.0136716	6.86816e-06	8235	Glycerol to carnitine ratio	TRUE	reported	MLyg4F	0.00245052	20.2247	2	1	TRUE
rs2229322	T	C	T	C	0.098218	-0.040822	0.104296	NA	FALSE	FALSE	FALSE	EBI-a-GCST002318	16	11016045	0.11	0.0259042	57284	EBI-a-GCST002318	TRUE	reported	16	10922188	0.0220845	8.69281e-06	8235	Glycerol to carnitine ratio	TRUE	reported	MLyg4F	0.00239608	19.7743	2	1	TRUE
rs2299168	C	T	C	T	0.215748	-0.00995033	0.0200146	NA	FALSE	FALSE	FALSE	EBI-a-GCST002318	7	81923113	0.780001	0.0366458	57284	EBI-a-GCST002318	TRUE	reported	7	82293797	0.047884	6.61749e-06	8235	Glycerol to carnitine ratio	TRUE	reported	MLyg4F	0.00245912	20.2958	2	1	TRUE
rs34437475	A	G	A	G	0.0757113	0.00995033	0.199538	NA	FALSE	FALSE	FALSE	EBI-a-GCST002318	21	28274812	0.82	0.0246523	57284	EBI-a-GCST002318	TRUE	reported	21	26902493	0.0167952	6.54716e-06	8235	Glycerol to carnitine ratio	TRUE	reported	MLyg4F	0.0024616	20.3163	2	1	TRUE
rs35298690	C	T	C	T	0.0815	-0.0392207	0.214627	NA	FALSE	FALSE	FALSE	EBI-a-GCST002318	15	24450721	0.13	0.0251383	57284	EBI-a-GCST002318	TRUE	reported	15	24205574	0.0162866	5.61205e-07	8235	Glycerol to carnitine ratio	TRUE	reported	MLyg4F	0.0030316	25.0351	2	1	TRUE
rs61621666	G	A	G	A	0.145927	-0.0295588	0.0522407	NA	FALSE	FALSE	FALSE	EBI-a-GCST002318	4	38983613	0.57	0.0466501	57284	EBI-a-GCST002318	TRUE	reported	4	38981993	0.0303121	1.4783e-06	8235	Glycerol to carnitine ratio	TRUE	reported	MLyg4F	0.00280644	23.1704	2	1	TRUE
rs62116851	G	A	G	A	-0.109047	0.0512933	0.0917547	NA	FALSE	FALSE	FALSE	EBI-a-GCST002318	19	16187810	0.24	0.044882	57284	EBI-a-GCST002318	TRUE	reported	19	16077000	0.0238058	4.63465e-06	8235	Glycerol to carnitine ratio	TRUE	reported	MLyg4F	0.00254152	20.9776	2	1	TRUE
rs72819866	C	T	C	T	0.115998	0	0.0725468	NA	FALSE	FALSE	FALSE	EBI-a-GCST002318	2	81922171	0.97	0.0481177	57284	EBI-a-GCST002318	TRUE	reported	2	81695047	0.026146	9.14064e-06	8235	Glycerol to carnitine ratio	TRUE	reported	MLyg4F	0.00238446	19.6782	2	1	TRUE
rs7327786	G	A	G	A	0.102037	0.040822	0.097912	NA	FALSE	FALSE	FALSE	EBI-a-GCST002318	13	31579567	0.0830004	0.0217141	57284	EBI-a-GCST002318	TRUE	reported	13	31005430	0.0224847	5.67724e-06	8235	Glycerol to carnitine ratio	TRUE	reported	MLyg4F	0.00249455	20.589	2	1	TRUE
rs75960481	A	G	A	G	0.251149	-0.0512933	0.0158624	NA	FALSE	FALSE	FALSE	EBI-a-GCST002318	1	181477261	0.58	0.088526	57284	EBI-a-GCST002318	TRUE	reported	1	181508125	0.0535661	2.75104e-06	8235	Glycerol to carnitine ratio	TRUE	reported	MLyg4F	0.00266233	21.9775	2	1	TRUE
rs7705826	G	T	G	T	-0.0959775	-0.0295588	0.833721	NA	FALSE	FALSE	FALSE	EBI-a-GCST002318	5	131732456	0.0940005	0.0202087	57284	EBI-a-GCST002318	TRUE	reported	5	132396764	0.018058	1.06691e-07	8235	Glycerol to carnitine ratio	TRUE	reported	MLyg4F	0.0034186	28.2419	2	1	TRUE
rs78819701	C	T	C	T	0.171753	0.139262	0.0366715	NA	FALSE	FALSE	FALSE	EBI-a-GCST002318	5	81580790	0.0140001	0.0557139	57284	EBI-a-GCST002318	TRUE	reported	5	82284971	0.0357783	1.58287e-06	8235	Glycerol to carnitine ratio	TRUE	reported	MLyg4F	0.00279056	23.039	2	1	TRUE
rs8061003	G	A	G	A	0.066051	0.0202027	0.352254	NA	FALSE	FALSE	FALSE	EBI-a-GCST002318	16	26243311	0.2	0.0158625	57284	EBI-a-GCST002318	TRUE	reported	16	26231990	0.0141994	3.29253e-06	8235	Glycerol to carnitine ratio	TRUE	reported	MLyg4F	0.00262069	21.6328	2	1	TRUE
rs1000136	T	C	T	C	-0.0733014	-0.0100503	0.45395	NA	FALSE	FALSE	FALSE	EBI-a-GCST002318	7	157644121	0.630001	0.0202087	57284	EBI-a-GCST002318	TRUE	reported	7	157851429	0.0156064	2.64178e-06	5582	17alpha-hydroxypregnanolone glucuronide levels	TRUE	reported	jM75Lu	0.00393655	22.0528	2	1	TRUE
rs113723915	C	T	C	T	0.14444	0.0725707	0.0642636	NA	FALSE	FALSE	FALSE	EBI-a-GCST002318	3	103126008	0.0739997	0.045892	57284	EBI-a-GCST002318	TRUE	reported	3	103407164	0.0321638	7.09744e-06	5582	17alpha-hydroxypregnanolone glucuronide levels	TRUE	reported	jM75Lu	0.00359985	20.1597	2	1	TRUE
rs117242229	C	A	C	A	-0.282721	-0.0676586	0.0175707	NA	FALSE	FALSE	FALSE	EBI-a-GCST002318	20	22906716	0.55	0.117438	57284	EBI-a-GCST002318	TRUE	reported	20	22926079	0.0592917	1.85781e-06	5582	17alpha-hydroxypregnanolone glucuronide levels	TRUE	reported	jM75Lu	0.0040567	22.7286	2	1	TRUE
rs118134155	C	A	C	A	-0.232265	0	0.0262732	NA	FALSE	FALSE	FALSE	EBI-a-GCST002318	15	84508221	0.99	0.0652211	57284	EBI-a-GCST002318	TRUE	reported	15	83839469	0.0483736	1.57489e-06	5582	17alpha-hydroxypregnanolone glucuronide levels	TRUE	reported	jM75Lu	0.00411312	23.046	2	1	TRUE
rs12372336	G	T	G	T	-0.0757041	0.0202027	0.310307	NA	FALSE	FALSE	FALSE	EBI-a-GCST002318	12	43399180	0.35	0.0158625	57284	EBI-a-GCST002318	TRUE	reported	12	43005377	0.0169643	8.09843e-06	5582	17alpha-hydroxypregnanolone glucuronide levels	TRUE	reported	jM75Lu	0.00355493	19.9073	2	1	TRUE
rs12989207	T	C	T	C	0.108214	0.00995033	0.132746	NA	FALSE	FALSE	FALSE	EBI-a-GCST002318	2	65196474	0.68	0.029443	57284	EBI-a-GCST002318	TRUE	reported	2	64969340	0.0228032	2.07921e-06	5582	17alpha-hydroxypregnanolone glucuronide levels	TRUE	reported	jM75Lu	0.00401825	22.5123	2	1	TRUE
rs142131421	A	G	A	G	0.681648	-0.0100503	0.0707877	NA	FALSE	FALSE	FALSE	EBI-a-GCST002318	11	62818385	0.79	0.0443936	57284	EBI-a-GCST002318	TRUE	reported	11	63050913	0.0290974	2.30179e-121	5582	17alpha-hydroxypregnanolone glucuronide levels	TRUE	reported	jM75Lu	0.0895148	548.601	2	1	TRUE
rs145323940	C	T	C	T	-0.347083	0.0943107	0.0104317	NA	FALSE	FALSE	FALSE	EBI-a-GCST002318	3	121811013	0.39	0.105507	57284	EBI-a-GCST002318	TRUE	reported	3	122092166	0.0758077	4.68388e-06	5582	17alpha-hydroxypregnanolone glucuronide levels	TRUE	reported	jM75Lu	0.0037413	20.9548	2	1	TRUE
rs1574706	G	A	G	A	0.221115	0.0512933	0.974909	NA	FALSE	FALSE	FALSE	EBI-a-GCST002318	2	138470344	0.0449997	0.0219476	57284	EBI-a-GCST002318	TRUE	reported	2	137712774	0.0499215	9.45612e-06	5582	17alpha-hydroxypregnanolone glucuronide levels	TRUE	reported	jM75Lu	0.00350225	19.6113	2	1	TRUE
rs17678628	C	T	C	T	0.195708	0.0833816	0.0409262	NA	FALSE	FALSE	FALSE	EBI-a-GCST002318	2	144561374	0.17	0.0587088	57284	EBI-a-GCST002318	TRUE	reported	2	143803805	0.0398777	9.21537e-07	5582	17alpha-hydroxypregnanolone glucuronide levels	TRUE	reported	jM75Lu	0.00429633	24.0769	2	1	TRUE
rs17719944	G	A	G	A	0.130072	0.0100503	0.0879488	NA	FALSE	FALSE	FALSE	EBI-a-GCST002318	17	26729453	0.84	0.0374139	57284	EBI-a-GCST002318	TRUE	reported	17	28402435	0.0277789	2.83536e-06	5582	17alpha-hydroxypregnanolone glucuronide levels	TRUE	reported	jM75Lu	0.00391242	21.917	2	1	TRUE
rs191145320	T	C	T	C	-0.300691	-0.0100503	0.013533	NA	FALSE	FALSE	FALSE	EBI-a-GCST002318	1	215973135	0.95	0.131077	57284	EBI-a-GCST002318	TRUE	reported	1	215799793	0.0671361	7.50524e-06	5582	17alpha-hydroxypregnanolone glucuronide levels	TRUE	reported	jM75Lu	0.00358081	20.0527	2	1	TRUE
rs2433279	G	T	G	T	-0.109732	0.0100503	0.884817	NA	FALSE	FALSE	FALSE	EBI-a-GCST002318	1	93907909	0.61	0.0210423	57284	EBI-a-GCST002318	TRUE	reported	1	93442352	0.0243898	6.82455e-06	5582	17alpha-hydroxypregnanolone glucuronide levels	TRUE	reported	jM75Lu	0.00361317	20.2346	2	1	TRUE
rs2468872	A	G	A	G	-0.0764143	-0.0100503	0.555169	NA	FALSE	FALSE	FALSE	EBI-a-GCST002318	8	114933628	0.37	0.0152311	57284	EBI-a-GCST002318	TRUE	reported	8	113921399	0.0158682	1.46774e-06	5582	17alpha-hydroxypregnanolone glucuronide levels	TRUE	reported	jM75Lu	0.00413717	23.1813	2	1	TRUE
rs37482	A	G	A	G	0.111391	-0.0618754	0.117377	NA	FALSE	FALSE	FALSE	EBI-a-GCST002318	5	89841346	0.00280001	0.0212616	57284	EBI-a-GCST002318	TRUE	reported	5	90545529	0.0236813	2.55425e-06	5582	17alpha-hydroxypregnanolone glucuronide levels	TRUE	reported	jM75Lu	0.00394804	22.1174	2	1	TRUE
rs3785912	T	C	T	C	-0.0787216	0	0.342628	NA	FALSE	FALSE	FALSE	EBI-a-GCST002318	17	48756937	0.85	0.0200106	57284	EBI-a-GCST002318	TRUE	reported	17	50679576	0.0165527	1.97643e-06	5582	17alpha-hydroxypregnanolone glucuronide levels	TRUE	reported	jM75Lu	0.00403556	22.6097	2	1	TRUE
rs4713420	T	G	T	G	-0.100635	0.0676586	0.162442	NA	FALSE	FALSE	FALSE	EBI-a-GCST002318	6	30993567	2.90001e-05	0.0187252	57284	EBI-a-GCST002318	TRUE	reported	6	31025790	0.0211232	1.89609e-06	5582	17alpha-hydroxypregnanolone glucuronide levels	TRUE	reported	jM75Lu	0.00404973	22.6894	2	1	TRUE
rs540582	C	T	C	T	-0.0993954	0	0.581372	NA	FALSE	FALSE	FALSE	EBI-a-GCST002318	11	63079770	0.75	0.0103075	57284	EBI-a-GCST002318	TRUE	reported	11	63312298	0.0157566	2.82314e-10	5582	17alpha-hydroxypregnanolone glucuronide levels	TRUE	reported	jM75Lu	0.00707836	39.7788	2	1	TRUE
rs60865673	C	T	C	T	0.120178	0.0512933	0.0920981	NA	FALSE	FALSE	FALSE	EBI-a-GCST002318	11	45619645	0.0669993	0.0275853	57284	EBI-a-GCST002318	TRUE	reported	11	45598095	0.0268285	7.48208e-06	5582	17alpha-hydroxypregnanolone glucuronide levels	TRUE	reported	jM75Lu	0.00358186	20.0586	2	1	TRUE
rs62084022	T	C	T	C	-0.0804557	-0.0304592	0.304011	NA	FALSE	FALSE	FALSE	EBI-a-GCST002318	18	3583716	0.26	0.0256438	57284	EBI-a-GCST002318	TRUE	reported	18	3583718	0.017639	5.08527e-06	5582	17alpha-hydroxypregnanolone glucuronide levels	TRUE	reported	jM75Lu	0.0037133	20.7974	2	1	TRUE
rs7171867	G	T	G	T	-0.115576	0.0100503	0.105424	NA	FALSE	FALSE	FALSE	EBI-a-GCST002318	15	90434413	0.7	0.0210423	57284	EBI-a-GCST002318	TRUE	reported	15	89891181	0.0252425	4.6806e-06	5582	17alpha-hydroxypregnanolone glucuronide levels	TRUE	reported	jM75Lu	0.00374156	20.9563	2	1	TRUE
rs73194752	T	C	T	C	-0.103398	0.0295588	0.140129	NA	FALSE	FALSE	FALSE	EBI-a-GCST002318	4	4914578	0.23	0.0288872	57284	EBI-a-GCST002318	TRUE	reported	4	4912851	0.0224304	4.03185e-06	5582	17alpha-hydroxypregnanolone glucuronide levels	TRUE	reported	jM75Lu	0.00379237	21.242	2	1	TRUE
rs9527	T	C	T	C	0.0891597	0.0392207	0.246771	NA	FALSE	FALSE	FALSE	EBI-a-GCST002318	10	104623578	0.017	0.0145092	57284	EBI-a-GCST002318	TRUE	reported	10	102863821	0.0179007	6.33283e-07	5582	17alpha-hydroxypregnanolone glucuronide levels	TRUE	reported	jM75Lu	0.00442468	24.7994	2	1	TRUE
rs1000141	T	C	T	C	0.0734663	-0.0202027	0.513366	NA	FALSE	FALSE	FALSE	EBI-a-GCST002318	2	234242347	0.0990011	0.0103075	57284	EBI-a-GCST002318	TRUE	reported	2	233333701	0.0154065	1.85579e-06	8233	3-methyl-2-oxovalerate to 4-methyl-2-oxopentanoate ratio	TRUE	reported	pOVp9a	0.00275431	22.7333	2	1	TRUE
rs113732730	T	G	T	G	0.161064	0.0198026	0.0488924	NA	FALSE	FALSE	FALSE	EBI-a-GCST002318	3	73969159	0.36	0.0291625	57284	EBI-a-GCST002318	TRUE	reported	3	73920008	0.0357767	6.73436e-06	8233	3-methyl-2-oxovalerate to 4-methyl-2-oxopentanoate ratio	TRUE	reported	pOVp9a	0.00245567	20.2624	2	1	TRUE
rs116919726	A	C	A	C	0.122495	-0.0512933	0.0873296	NA	FALSE	FALSE	FALSE	EBI-a-GCST002318	8	112790441	0.22	0.0412511	57284	EBI-a-GCST002318	TRUE	reported	8	111778212	0.0274008	7.80343e-06	8233	3-methyl-2-oxovalerate to 4-methyl-2-oxopentanoate ratio	TRUE	reported	pOVp9a	0.00242158	19.9804	2	1	TRUE
rs12417993	C	T	C	T	-0.0885577	-0.0392207	0.186986	NA	FALSE	FALSE	FALSE	EBI-a-GCST002318	11	128318491	0.0280001	0.0200106	57284	EBI-a-GCST002318	TRUE	reported	11	128448596	0.0197457	7.29481e-06	8233	3-methyl-2-oxovalerate to 4-methyl-2-oxopentanoate ratio	TRUE	reported	pOVp9a	0.00243719	20.1095	2	1	TRUE
rs12737655	A	G	A	G	-0.148867	-0.0100503	0.0568951	NA	FALSE	FALSE	FALSE	EBI-a-GCST002318	1	52846324	0.91	0.0719789	57284	EBI-a-GCST002318	TRUE	reported	1	52380652	0.0332605	7.61288e-06	8233	3-methyl-2-oxovalerate to 4-methyl-2-oxopentanoate ratio	TRUE	reported	pOVp9a	0.00242731	20.0278	2	1	TRUE
rs13381382	T	C	T	C	-0.0748896	0.0295588	0.352041	NA	FALSE	FALSE	FALSE	EBI-a-GCST002318	18	43144653	0.061	0.014648	57284	EBI-a-GCST002318	TRUE	reported	18	45564688	0.0162225	3.90436e-06	8233	3-methyl-2-oxovalerate to 4-methyl-2-oxopentanoate ratio	TRUE	reported	pOVp9a	0.00258182	21.306	2	1	TRUE
rs141588879	G	A	G	A	0.178622	-0.00995033	0.0373535	NA	FALSE	FALSE	FALSE	EBI-a-GCST002318	4	159910794	0.85	0.0761288	57284	EBI-a-GCST002318	TRUE	reported	4	158989642	0.0401743	8.74053e-06	8233	3-methyl-2-oxovalerate to 4-methyl-2-oxopentanoate ratio	TRUE	reported	pOVp9a	0.00239538	19.7637	2	1	TRUE
rs142722792	T	C	T	C	0.227479	-0.0100503	0.0272163	NA	FALSE	FALSE	FALSE	EBI-a-GCST002318	11	82603234	0.9	0.0808522	57284	EBI-a-GCST002318	TRUE	reported	11	82892192	0.0473106	1.52294e-06	8233	3-methyl-2-oxovalerate to 4-methyl-2-oxopentanoate ratio	TRUE	reported	pOVp9a	0.0028002	23.1132	2	1	TRUE
rs191675623	T	C	T	C	0.145929	0.0676586	0.0706432	NA	FALSE	FALSE	FALSE	EBI-a-GCST002318	3	1715149	0.26	0.054232	57284	EBI-a-GCST002318	TRUE	reported	3	1673465	0.0305448	1.77437e-06	8233	3-methyl-2-oxovalerate to 4-methyl-2-oxopentanoate ratio	TRUE	reported	pOVp9a	0.0027647	22.8193	2	1	TRUE
rs2164029	G	A	G	A	-0.0733352	-0.00995033	0.36929	NA	FALSE	FALSE	FALSE	EBI-a-GCST002318	18	20831009	0.34	0.0102044	57284	EBI-a-GCST002318	TRUE	reported	18	23251045	0.0162919	6.75265e-06	8233	3-methyl-2-oxovalerate to 4-methyl-2-oxopentanoate ratio	TRUE	reported	pOVp9a	0.00245502	20.257	2	1	TRUE
rs2395845	A	C	A	C	-0.121801	-0.0202027	0.0902297	NA	FALSE	FALSE	FALSE	EBI-a-GCST002318	2	222993315	0.59	0.0352004	57284	EBI-a-GCST002318	TRUE	reported	2	222128596	0.0269548	6.22104e-06	8233	3-methyl-2-oxovalerate to 4-methyl-2-oxopentanoate ratio	TRUE	reported	pOVp9a	0.00247398	20.4138	2	1	TRUE
rs4689805	A	G	A	G	0.0821165	0	0.228364	NA	FALSE	FALSE	FALSE	EBI-a-GCST002318	4	7625907	0.91	0.015081	57284	EBI-a-GCST002318	TRUE	reported	4	7624180	0.0183677	7.79603e-06	8233	3-methyl-2-oxovalerate to 4-methyl-2-oxopentanoate ratio	TRUE	reported	pOVp9a	0.00242181	19.9823	2	1	TRUE
rs73102110	C	A	C	A	-0.219967	0.0618754	0.0270419	NA	FALSE	FALSE	FALSE	EBI-a-GCST002318	3	69546748	0.4	0.0822797	57284	EBI-a-GCST002318	TRUE	reported	3	69497597	0.0475091	3.6565e-06	8233	3-methyl-2-oxovalerate to 4-methyl-2-oxopentanoate ratio	TRUE	reported	pOVp9a	0.00259701	21.4317	2	1	TRUE
rs73225991	A	G	A	G	-0.095493	0.0198026	0.156934	NA	FALSE	FALSE	FALSE	EBI-a-GCST002318	4	12604788	0.27	0.0196257	57284	EBI-a-GCST002318	TRUE	reported	4	12603164	0.0212534	7.02045e-06	8233	3-methyl-2-oxovalerate to 4-methyl-2-oxopentanoate ratio	TRUE	reported	pOVp9a	0.00244605	20.1828	2	1	TRUE
rs75204119	A	G	A	G	0.280451	0.0582689	0.015205	NA	FALSE	FALSE	FALSE	EBI-a-GCST002318	11	94307891	0.0920005	0.0326269	57284	EBI-a-GCST002318	TRUE	reported	11	94574725	0.0629614	8.41518e-06	8233	3-methyl-2-oxovalerate to 4-methyl-2-oxopentanoate ratio	TRUE	reported	pOVp9a	0.00240415	19.8363	2	1	TRUE
rs76178213	T	C	T	C	-0.279018	0.165514	0.0150262	NA	FALSE	FALSE	FALSE	EBI-a-GCST002318	20	58552871	0.0409996	0.0798822	57284	EBI-a-GCST002318	TRUE	reported	20	59977816	0.0630683	9.68677e-06	8233	3-methyl-2-oxovalerate to 4-methyl-2-oxopentanoate ratio	TRUE	reported	pOVp9a	0.00237166	19.5676	2	1	TRUE
rs7779635	C	T	C	T	-0.0756897	0	0.713041	NA	FALSE	FALSE	FALSE	EBI-a-GCST002318	7	80532504	0.79	0.0208275	57284	EBI-a-GCST002318	TRUE	reported	7	80903188	0.0168741	7.27274e-06	8233	3-methyl-2-oxovalerate to 4-methyl-2-oxopentanoate ratio	TRUE	reported	pOVp9a	0.00243789	20.1153	2	1	TRUE
rs8030711	C	T	C	T	-0.0949177	-0.0295588	0.153818	NA	FALSE	FALSE	FALSE	EBI-a-GCST002318	15	88491843	0.14	0.0202087	57284	EBI-a-GCST002318	TRUE	reported	15	87948612	0.0213963	9.15717e-06	8233	3-methyl-2-oxovalerate to 4-methyl-2-oxopentanoate ratio	TRUE	reported	pOVp9a	0.00238464	19.6749	2	1	TRUE
rs1000156	G	A	G	A	-0.0892357	-0.00995033	0.20765	NA	FALSE	FALSE	FALSE	EBI-a-GCST002318	8	103951061	0.73	0.0206171	57284	EBI-a-GCST002318	TRUE	reported	8	102938833	0.0188882	2.30793e-06	8222	Glycerate levels	TRUE	reported	NgN7R0	0.00270733	22.3147	2	1	TRUE
rs1133621	T	G	T	G	0.107914	-0.0202027	0.885566	NA	FALSE	FALSE	FALSE	EBI-a-GCST002318	8	126761459	0.709999	0.0589351	57284	EBI-a-GCST002318	TRUE	reported	8	125749215	0.0240638	7.30891e-06	8222	Glycerate levels	TRUE	reported	NgN7R0	0.00243999	20.1058	2	1	TRUE
rs11766962	C	T	C	T	-0.0899609	0.0304592	0.225559	NA	FALSE	FALSE	FALSE	EBI-a-GCST002318	7	126493379	0.21	0.0214855	57284	EBI-a-GCST002318	TRUE	reported	7	126853325	0.0186233	1.36156e-06	8222	Glycerate levels	TRUE	reported	NgN7R0	0.00283	23.3286	2	1	TRUE
rs117731450	A	G	A	G	-0.244065	-0.274437	0.0197224	NA	FALSE	FALSE	FALSE	EBI-a-GCST002318	13	31078796	0.34	0.28934	57284	EBI-a-GCST002318	TRUE	reported	13	30504659	0.0551232	9.52758e-06	8222	Glycerate levels	TRUE	reported	NgN7R0	0.00237865	19.5991	2	1	TRUE
rs138250602	G	T	G	T	-0.156885	0.0304592	0.0491492	NA	FALSE	FALSE	FALSE	EBI-a-GCST002318	4	22124722	0.760001	0.111226	57284	EBI-a-GCST002318	TRUE	reported	4	22123099	0.0354448	9.59188e-06	8222	Glycerate levels	TRUE	reported	NgN7R0	0.0023771	19.5863	2	1	TRUE
rs1449141	C	A	C	A	-0.0794245	-0.0295588	0.28231	NA	FALSE	FALSE	FALSE	EBI-a-GCST002318	2	232383884	0.0850002	0.015081	57284	EBI-a-GCST002318	TRUE	reported	2	231519173	0.0170941	3.37909e-06	8222	Glycerate levels	TRUE	reported	NgN7R0	0.00261879	21.583	2	1	TRUE
rs149160598	A	G	A	G	-0.317679	-0.0618754	0.0164095	NA	FALSE	FALSE	FALSE	EBI-a-GCST002318	2	102397896	0.43	0.0801967	57284	EBI-a-GCST002318	TRUE	reported	2	101781434	0.06091	1.83279e-07	8222	Glycerate levels	TRUE	reported	NgN7R0	0.00329752	27.1953	2	1	TRUE
rs183630170	C	A	C	A	0.305391	-0.10436	0.0134093	NA	FALSE	FALSE	FALSE	EBI-a-GCST002318	7	91883738	0.6	0.200021	57284	EBI-a-GCST002318	TRUE	reported	7	92254424	0.0668327	4.88928e-06	8222	Glycerate levels	TRUE	reported	NgN7R0	0.00253312	20.8751	2	1	TRUE
rs2279694	C	T	C	T	0.0737581	0	0.671949	NA	FALSE	FALSE	FALSE	EBI-a-GCST002318	11	133520207	0.93	0.0208275	57284	EBI-a-GCST002318	TRUE	reported	11	133650312	0.016588	8.72972e-06	8222	Glycerate levels	TRUE	reported	NgN7R0	0.00239889	19.7663	2	1	TRUE
rs2394872	C	A	C	A	-0.129378	-0.00995033	0.0928764	NA	FALSE	FALSE	FALSE	EBI-a-GCST002318	7	98212745	0.84	0.0312467	57284	EBI-a-GCST002318	TRUE	reported	7	98583433	0.0263373	8.99835e-07	8222	Glycerate levels	TRUE	reported	NgN7R0	0.00292636	24.1253	2	1	TRUE
rs2540970	C	T	C	T	0.0731367	-0.00995033	0.339805	NA	FALSE	FALSE	FALSE	EBI-a-GCST002318	2	65255099	0.47	0.0153842	57284	EBI-a-GCST002318	TRUE	reported	2	65027965	0.0162715	6.96423e-06	8222	Glycerate levels	TRUE	reported	NgN7R0	0.00245116	20.1981	2	1	TRUE
rs3733487	A	C	A	C	-0.309579	-0.18633	0.986892	NA	FALSE	FALSE	FALSE	EBI-a-GCST002318	4	71684416	0.015	0.0795257	57284	EBI-a-GCST002318	TRUE	reported	4	70818699	0.0682205	5.68122e-06	8222	Glycerate levels	TRUE	reported	NgN7R0	0.00249833	20.5877	2	1	TRUE
rs3814027	T	C	T	C	0.0822872	-0.0304592	0.525613	NA	FALSE	FALSE	FALSE	EBI-a-GCST002318	2	112641854	0.3	0.0306214	57284	EBI-a-GCST002318	TRUE	reported	2	111884277	0.0158679	2.15145e-07	8222	Glycerate levels	TRUE	reported	NgN7R0	0.00326009	26.8856	2	1	TRUE
rs4523130	G	A	G	A	-0.188253	-0.19062	0.0338044	NA	FALSE	FALSE	FALSE	EBI-a-GCST002318	6	6815354	0.0629999	0.102383	57284	EBI-a-GCST002318	TRUE	reported	6	6815121	0.0424813	9.36148e-06	8222	Glycerate levels	TRUE	reported	NgN7R0	0.00238273	19.6328	2	1	TRUE
rs55836930	G	T	G	T	0.230304	0.0100503	0.0248808	NA	FALSE	FALSE	FALSE	EBI-a-GCST002318	12	119418504	0.92	0.0777901	57284	EBI-a-GCST002318	TRUE	reported	12	118980699	0.0491907	2.84279e-06	8222	Glycerate levels	TRUE	reported	NgN7R0	0.00265891	21.9145	2	1	TRUE
rs62381198	T	C	T	C	-0.252861	0.00995033	0.0256878	NA	FALSE	FALSE	FALSE	EBI-a-GCST002318	5	138179171	0.93	0.104674	57284	EBI-a-GCST002318	TRUE	reported	5	138843482	0.0482457	1.59603e-07	8222	Glycerate levels	TRUE	reported	NgN7R0	0.00332982	27.4625	2	1	TRUE
rs62381616	T	C	T	C	-0.275712	-0.0304592	0.0307627	NA	FALSE	FALSE	FALSE	EBI-a-GCST002318	5	138681033	0.47	0.0452694	57284	EBI-a-GCST002318	TRUE	reported	5	139345344	0.044263	4.69543e-10	8222	Glycerate levels	TRUE	reported	NgN7R0	0.00469686	38.7904	2	1	TRUE
rs6554022	A	C	A	C	-0.116404	-0.0100503	0.107208	NA	FALSE	FALSE	FALSE	EBI-a-GCST002318	4	32327311	0.62	0.0202087	57284	EBI-a-GCST002318	TRUE	reported	4	32325689	0.0250231	3.28947e-06	8222	Glycerate levels	TRUE	reported	NgN7R0	0.00262503	21.6346	2	1	TRUE
rs756874	G	A	G	A	0.074803	0.0512933	0.366725	NA	FALSE	FALSE	FALSE	EBI-a-GCST002318	15	91717237	0.0189998	0.0219476	57284	EBI-a-GCST002318	TRUE	reported	15	91174007	0.0159593	2.77104e-06	8222	Glycerate levels	TRUE	reported	NgN7R0	0.00266486	21.9637	2	1	TRUE
rs9808439	T	C	T	C	-0.197404	0.00995033	0.0316533	NA	FALSE	FALSE	FALSE	EBI-a-GCST002318	2	218676321	0.86	0.029443	57284	EBI-a-GCST002318	TRUE	reported	2	217811598	0.0438208	6.64367e-06	8222	Glycerate levels	TRUE	reported	NgN7R0	0.00246209	20.2883	2	1	TRUE
rs10003807	C	T	C	T	-0.214142	0.0202027	0.0380592	NA	FALSE	FALSE	FALSE	EBI-a-GCST002318	4	181182365	0.53	0.0378102	57284	EBI-a-GCST002318	TRUE	reported	4	180261212	0.0423463	4.2609e-07	7286	3-methoxycatechol sulfate (2) levels	TRUE	reported	7BR4NF	0.00349753	25.5655	2	1	TRUE
rs11724679	G	A	G	A	-0.152964	0.0304592	0.0704986	NA	FALSE	FALSE	FALSE	EBI-a-GCST002318	4	143800361	0.36	0.038215	57284	EBI-a-GCST002318	TRUE	reported	4	142879208	0.0318999	1.62568e-06	7286	3-methoxycatechol sulfate (2) levels	TRUE	reported	7BR4NF	0.00314588	22.9869	2	1	TRUE
rs2027378	G	T	G	T	0.0986684	-0.0392207	0.83805	NA	FALSE	FALSE	FALSE	EBI-a-GCST002318	10	6940378	0.0690001	0.0200106	57284	EBI-a-GCST002318	TRUE	reported	10	6898416	0.022123	8.19651e-06	7286	3-methoxycatechol sulfate (2) levels	TRUE	reported	7BR4NF	0.00272267	19.8861	2	1	TRUE
rs2112460	A	G	A	G	0.0767993	0	0.487295	NA	FALSE	FALSE	FALSE	EBI-a-GCST002318	19	13590412	0.88	0.015081	57284	EBI-a-GCST002318	TRUE	reported	19	13479598	0.0162018	2.13543e-06	7286	3-methoxycatechol sulfate (2) levels	TRUE	reported	7BR4NF	0.00307441	22.4631	2	1	TRUE
rs4611006	C	T	C	T	0.0782356	0.0202027	0.316411	NA	FALSE	FALSE	FALSE	EBI-a-GCST002318	1	223545114	0.28	0.0158625	57284	EBI-a-GCST002318	TRUE	reported	1	223371772	0.0175621	8.39715e-06	7286	3-methoxycatechol sulfate (2) levels	TRUE	reported	7BR4NF	0.00271635	19.8398	2	1	TRUE
rs56681315	T	C	T	C	0.120369	-0.0202027	0.111959	NA	FALSE	FALSE	FALSE	EBI-a-GCST002318	14	33910777	0.36	0.0204109	57284	EBI-a-GCST002318	TRUE	reported	14	33441571	0.0264445	5.32027e-06	7286	3-methoxycatechol sulfate (2) levels	TRUE	reported	7BR4NF	0.00283554	20.7128	2	1	TRUE
rs62428058	A	G	A	G	0.134476	-0.0304592	0.0877132	NA	FALSE	FALSE	FALSE	EBI-a-GCST002318	6	122052090	0.44	0.035551	57284	EBI-a-GCST002318	TRUE	reported	6	121730944	0.0291841	4.06839e-06	7286	3-methoxycatechol sulfate (2) levels	TRUE	reported	7BR4NF	0.00290565	21.2265	2	1	TRUE
rs73006493	C	T	C	T	-0.149264	0.0100503	0.0623104	NA	FALSE	FALSE	FALSE	EBI-a-GCST002318	11	109237272	0.81	0.0318981	57284	EBI-a-GCST002318	TRUE	reported	11	109366546	0.0336821	9.35548e-06	7286	3-methoxycatechol sulfate (2) levels	TRUE	reported	7BR4NF	0.00268815	19.6333	2	1	TRUE
rs7665238	A	G	A	G	0.0854025	0.00995033	0.747536	NA	FALSE	FALSE	FALSE	EBI-a-GCST002318	4	124329732	0.760001	0.0149339	57284	EBI-a-GCST002318	TRUE	reported	4	123408577	0.0187425	5.19845e-06	7286	3-methoxycatechol sulfate (2) levels	TRUE	reported	7BR4NF	0.00284159	20.7571	2	1	TRUE
rs7935436	C	T	C	T	0.0796945	0	0.338448	NA	FALSE	FALSE	FALSE	EBI-a-GCST002318	11	81258898	0.97	0.0155404	57284	EBI-a-GCST002318	TRUE	reported	11	81547856	0.0172088	3.63849e-06	7286	3-methoxycatechol sulfate (2) levels	TRUE	reported	7BR4NF	0.00293488	21.4406	2	1	TRUE
rs10004304	T	C	T	C	0.0952775	0	0.183266	NA	FALSE	FALSE	FALSE	EBI-a-GCST002318	4	5344005	0.94	0.0200106	57284	EBI-a-GCST002318	TRUE	reported	4	5342278	0.0202523	2.54455e-06	8053	X-24241 levels	TRUE	reported	jhIqwf	0.00274083	22.1271	2	1	TRUE
rs1050152	T	C	T	C	-0.107399	-0.0304592	0.430152	NA	FALSE	FALSE	FALSE	EBI-a-GCST002318	5	131676320	0.0790005	0.0155404	57284	EBI-a-GCST002318	TRUE	reported	5	132340627	0.0156755	7.31396e-12	8053	X-24241 levels	TRUE	reported	jhIqwf	0.0057953	46.9299	2	1	TRUE
rs10929472	A	G	A	G	0.081388	0.00995033	0.251137	NA	FALSE	FALSE	FALSE	EBI-a-GCST002318	2	7374639	0.55	0.0149339	57284	EBI-a-GCST002318	TRUE	reported	2	7234508	0.0179791	5.98794e-06	8053	X-24241 levels	TRUE	reported	jhIqwf	0.00253819	20.4869	2	1	TRUE
rs115566627	C	T	C	T	-0.285575	-0.10436	0.0156757	NA	FALSE	FALSE	FALSE	EBI-a-GCST002318	6	13772330	0.23	0.0902708	57284	EBI-a-GCST002318	TRUE	reported	6	13772098	0.0626037	5.07556e-06	8053	X-24241 levels	TRUE	reported	jhIqwf	0.00257728	20.8033	2	1	TRUE
rs1171614	C	T	C	T	0.163222	-0.00995033	0.770896	NA	FALSE	FALSE	FALSE	EBI-a-GCST002318	10	61469538	0.66	0.0259042	57284	EBI-a-GCST002318	TRUE	reported	10	59709780	0.0188775	5.31586e-18	8053	X-24241 levels	TRUE	reported	jhIqwf	0.00919809	74.7413	2	1	TRUE
rs11743851	C	T	C	T	-0.0722142	-0.0198026	0.382492	NA	FALSE	FALSE	FALSE	EBI-a-GCST002318	5	130613600	0.48	0.0256438	57284	EBI-a-GCST002318	TRUE	reported	5	131277907	0.01597	6.12991e-06	8053	X-24241 levels	TRUE	reported	jhIqwf	0.00253266	20.4422	2	1	TRUE
rs117908981	C	T	C	T	-0.295735	0.105361	0.0175537	NA	FALSE	FALSE	FALSE	EBI-a-GCST002318	6	160030077	0.34	0.113849	57284	EBI-a-GCST002318	TRUE	reported	6	159609045	0.0595348	6.78441e-07	8053	X-24241 levels	TRUE	reported	jhIqwf	0.00305476	24.6692	2	1	TRUE
rs12208357	T	C	T	C	-0.190394	0.0392207	0.069401	NA	FALSE	FALSE	FALSE	EBI-a-GCST002318	6	160543148	0.3	0.0332343	57284	EBI-a-GCST002318	TRUE	reported	6	160122116	0.0303378	3.47857e-10	8053	X-24241 levels	TRUE	reported	jhIqwf	0.004867	39.3759	2	1	TRUE
rs12427077	G	A	G	A	-0.0971084	0	0.164684	NA	FALSE	FALSE	FALSE	EBI-a-GCST002318	12	13659461	0.94	0.0208275	57284	EBI-a-GCST002318	TRUE	reported	12	13506527	0.0210017	3.76719e-06	8053	X-24241 levels	TRUE	reported	jhIqwf	0.00264786	21.3745	2	1	TRUE
rs12903952	T	C	T	C	0.0961508	-0.0202027	0.189405	NA	FALSE	FALSE	FALSE	EBI-a-GCST002318	15	93706481	0.32	0.0204109	57284	EBI-a-GCST002318	TRUE	reported	15	93163252	0.0201602	1.84834e-06	8053	X-24241 levels	TRUE	reported	jhIqwf	0.00281665	22.7409	2	1	TRUE
rs139160	C	T	C	T	0.0776784	-0.00995033	0.720477	NA	FALSE	FALSE	FALSE	EBI-a-GCST002318	22	44597504	0.62	0.0153842	57284	EBI-a-GCST002318	TRUE	reported	22	44201624	0.0174627	8.65777e-06	8053	X-24241 levels	TRUE	reported	jhIqwf	0.00245106	19.782	2	1	TRUE
rs151285077	A	G	A	G	0.131983	0	0.0751057	NA	FALSE	FALSE	FALSE	EBI-a-GCST002318	17	40570421	0.95	0.0200106	57284	EBI-a-GCST002318	TRUE	reported	17	42418403	0.029454	7.43049e-06	8053	X-24241 levels	TRUE	reported	jhIqwf	0.00248719	20.0743	2	1	TRUE
rs1939293	C	T	C	T	0.13579	-0.0392207	0.0761631	NA	FALSE	FALSE	FALSE	EBI-a-GCST002318	11	96866947	0.12	0.0251383	57284	EBI-a-GCST002318	TRUE	reported	11	96995947	0.0292177	3.35919e-06	8053	X-24241 levels	TRUE	reported	jhIqwf	0.00267499	21.5941	2	1	TRUE
rs34059508	A	G	A	G	-0.33036	0	0.0256028	NA	FALSE	FALSE	FALSE	EBI-a-GCST002318	6	160575837	0.96	0.080104	57284	EBI-a-GCST002318	TRUE	reported	6	160154805	0.0489551	1.49658e-11	8053	X-24241 levels	TRUE	reported	jhIqwf	0.00562306	45.5272	2	1	TRUE
rs424029	A	G	A	G	-0.178391	-0.0618754	0.0430884	NA	FALSE	FALSE	FALSE	EBI-a-GCST002318	3	85010039	0.18	0.0466501	57284	EBI-a-GCST002318	TRUE	reported	3	84960888	0.0379512	2.59491e-06	8053	X-24241 levels	TRUE	reported	jhIqwf	0.0027362	22.0896	2	1	TRUE
rs60177389	C	A	C	A	0.146051	-0.0487902	0.0617138	NA	FALSE	FALSE	FALSE	EBI-a-GCST002318	18	26990134	0.29	0.0457205	57284	EBI-a-GCST002318	TRUE	reported	18	29410169	0.0319185	4.74494e-06	8053	X-24241 levels	TRUE	reported	jhIqwf	0.00259322	20.9323	2	1	TRUE
rs7234351	A	C	A	C	0.0721651	0.00995033	0.462574	NA	FALSE	FALSE	FALSE	EBI-a-GCST002318	18	65686626	0.630001	0.0149339	57284	EBI-a-GCST002318	TRUE	reported	18	68019389	0.0159329	5.91753e-06	8053	X-24241 levels	TRUE	reported	jhIqwf	0.00254099	20.5096	2	1	TRUE
rs75747525	A	G	A	G	0.0905312	-0.0100503	0.183348	NA	FALSE	FALSE	FALSE	EBI-a-GCST002318	2	185456897	0.75	0.0202087	57284	EBI-a-GCST002318	TRUE	reported	2	184592170	0.0203929	9.02317e-06	8053	X-24241 levels	TRUE	reported	jhIqwf	0.00244129	19.7029	2	1	TRUE
rs77010315	A	C	A	C	-0.391863	0.0198026	0.0120572	NA	FALSE	FALSE	FALSE	EBI-a-GCST002318	5	150723155	0.92	0.186459	57284	EBI-a-GCST002318	TRUE	reported	5	151343594	0.0711089	3.57303e-08	8053	X-24241 levels	TRUE	reported	jhIqwf	0.00375689	30.3608	2	1	TRUE
rs77874869	G	A	G	A	-0.172359	0.0943107	0.0421229	NA	FALSE	FALSE	FALSE	EBI-a-GCST002318	12	20288286	0.34	0.0919011	57284	EBI-a-GCST002318	TRUE	reported	12	20135352	0.0383688	7.0502e-06	8053	X-24241 levels	TRUE	reported	jhIqwf	0.00249958	20.1745	2	1	TRUE
rs10004542	G	A	G	A	0.0814848	0.0100503	0.340258	NA	FALSE	FALSE	FALSE	EBI-a-GCST002318	4	4720455	0.760001	0.0156998	57284	EBI-a-GCST002318	TRUE	reported	4	4718728	0.0176888	4.09376e-06	7099	Tartarate levels	TRUE	reported	koJ1ty	0.00298032	21.2146	2	1	TRUE
rs10247649	G	A	G	A	-0.0826258	0	0.344838	NA	FALSE	FALSE	FALSE	EBI-a-GCST002318	7	95216247	1	0.0155404	57284	EBI-a-GCST002318	TRUE	reported	7	95586935	0.0178465	3.65988e-06	7099	Tartarate levels	TRUE	reported	koJ1ty	0.00301036	21.429	2	1	TRUE
rs10945808	T	C	T	C	-0.130904	0.0295588	0.0976838	NA	FALSE	FALSE	FALSE	EBI-a-GCST002318	6	162720194	0.22	0.0241848	57284	EBI-a-GCST002318	TRUE	reported	6	162299162	0.0285309	4.47212e-06	7099	Tartarate levels	TRUE	reported	koJ1ty	0.00295659	21.0452	2	1	TRUE
rs117483011	A	G	A	G	-0.157832	-0.105361	0.0595121	NA	FALSE	FALSE	FALSE	EBI-a-GCST002318	8	3196910	0.02	0.0434479	57284	EBI-a-GCST002318	TRUE	reported	8	3339388	0.0354548	8.52127e-06	7099	Tartarate levels	TRUE	reported	koJ1ty	0.00278376	19.8115	2	1	TRUE
rs13089230	A	G	A	G	0.0825424	0	0.621953	NA	FALSE	FALSE	FALSE	EBI-a-GCST002318	3	177554204	0.91	0.015081	57284	EBI-a-GCST002318	TRUE	reported	3	177836416	0.0175787	2.65821e-06	7099	Tartarate levels	TRUE	reported	koJ1ty	0.00309626	22.0424	2	1	TRUE
rs141660852	T	C	T	C	0.228649	0	0.029224	NA	FALSE	FALSE	FALSE	EBI-a-GCST002318	18	60032338	0.95	0.0713071	57284	EBI-a-GCST002318	TRUE	reported	18	62365105	0.0493121	3.53868e-06	7099	Tartarate levels	TRUE	reported	koJ1ty	0.0030194	21.4936	2	1	TRUE
rs142959592	T	C	T	C	-0.373738	0.122218	0.0106022	NA	FALSE	FALSE	FALSE	EBI-a-GCST002318	11	76832372	0.29	0.116551	57284	EBI-a-GCST002318	TRUE	reported	11	77121326	0.0817952	4.89608e-06	7099	Tartarate levels	TRUE	reported	koJ1ty	0.00293229	20.8716	2	1	TRUE
rs17026163	T	C	T	C	-0.223964	-0.0100503	0.032701	NA	FALSE	FALSE	FALSE	EBI-a-GCST002318	2	102445645	0.86	0.0443936	57284	EBI-a-GCST002318	TRUE	reported	2	101829183	0.0470413	1.92634e-06	7099	Tartarate levels	TRUE	reported	koJ1ty	0.00318285	22.6608	2	1	TRUE
rs298392	T	C	T	C	0.087711	-0.0100503	0.28972	NA	FALSE	FALSE	FALSE	EBI-a-GCST002318	5	73847897	0.77	0.0202087	57284	EBI-a-GCST002318	TRUE	reported	5	74552072	0.0186612	2.59941e-06	7099	Tartarate levels	TRUE	reported	koJ1ty	0.00310229	22.0855	2	1	TRUE
rs628038	C	T	C	T	-0.0783007	0.0202027	0.386617	NA	FALSE	FALSE	FALSE	EBI-a-GCST002318	6	74325257	0.2	0.0158625	57284	EBI-a-GCST002318	TRUE	reported	6	73615534	0.0170337	4.2902e-06	7099	Tartarate levels	TRUE	reported	koJ1ty	0.00296774	21.1247	2	1	TRUE
rs73247410	A	G	A	G	0.3081	0.14842	0.0148725	NA	FALSE	FALSE	FALSE	EBI-a-GCST002318	6	164173386	0.0329997	0.069775	57284	EBI-a-GCST002318	TRUE	reported	6	163752354	0.069439	9.12266e-06	7099	Tartarate levels	TRUE	reported	koJ1ty	0.00276552	19.6813	2	1	TRUE
rs75583177	G	A	G	A	-0.145169	0	0.0701345	NA	FALSE	FALSE	FALSE	EBI-a-GCST002318	2	140644704	0.91	0.02617	57284	EBI-a-GCST002318	TRUE	reported	2	139887135	0.032432	7.60113e-06	7099	Tartarate levels	TRUE	reported	koJ1ty	0.00281436	20.0299	2	1	TRUE
rs76501568	T	C	T	C	-0.267429	0.0392207	0.02066	NA	FALSE	FALSE	FALSE	EBI-a-GCST002318	2	199959803	0.66	0.081444	57284	EBI-a-GCST002318	TRUE	reported	2	199095080	0.0587195	5.2548e-06	7099	Tartarate levels	TRUE	reported	koJ1ty	0.00291332	20.7362	2	1	TRUE
rs77798428	A	G	A	G	-0.318661	-0.0202027	0.0184793	NA	FALSE	FALSE	FALSE	EBI-a-GCST002318	15	58668401	0.53	0.0400365	57284	EBI-a-GCST002318	TRUE	reported	15	58376202	0.0614021	2.10597e-07	7099	Tartarate levels	TRUE	reported	koJ1ty	0.00377963	26.9258	2	1	TRUE
rs79983252	A	C	A	C	0.236427	0.00995033	0.0301043	NA	FALSE	FALSE	FALSE	EBI-a-GCST002318	1	175585513	0.86	0.0793694	57284	EBI-a-GCST002318	TRUE	reported	1	175616377	0.0486249	1.16058e-06	7099	Tartarate levels	TRUE	reported	koJ1ty	0.00331922	23.6349	2	1	TRUE
rs9948951	A	G	A	G	-0.0971868	0.0295588	0.184827	NA	FALSE	FALSE	FALSE	EBI-a-GCST002318	18	8592788	0.25	0.0241848	57284	EBI-a-GCST002318	TRUE	reported	18	8592790	0.0214343	5.78302e-06	7099	Tartarate levels	TRUE	reported	koJ1ty	0.00288764	20.5529	2	1	TRUE
rs1000533	C	T	C	T	-0.0744348	-0.00995033	0.350884	NA	FALSE	FALSE	FALSE	EBI-a-GCST002318	1	168282491	0.48	0.0153842	57284	EBI-a-GCST002318	TRUE	reported	1	168313253	0.016144	4.01341e-06	8200	3-methyl-2-oxovalerate to 3-methyl-2-oxobutyrate ratio	TRUE	reported	q8zH8G	0.00258578	21.2532	2	1	TRUE
rs111948662	A	G	A	G	-0.229599	0	0.0255551	NA	FALSE	FALSE	FALSE	EBI-a-GCST002318	11	122459660	1	0.0930212	57284	EBI-a-GCST002318	TRUE	reported	11	122588952	0.0481402	1.84786e-06	8200	3-methyl-2-oxovalerate to 3-methyl-2-oxobutyrate ratio	TRUE	reported	q8zH8G	0.00276635	22.7415	2	1	TRUE
rs11612260	G	A	G	A	0.231322	-0.0198026	0.0235527	NA	FALSE	FALSE	FALSE	EBI-a-GCST002318	12	56806686	0.8	0.0695594	57284	EBI-a-GCST002318	TRUE	reported	12	56412902	0.0502245	4.10972e-06	8200	3-methyl-2-oxovalerate to 3-methyl-2-oxobutyrate ratio	TRUE	reported	q8zH8G	0.00258028	21.2079	2	1	TRUE
rs12584035	G	A	G	A	0.101695	0.0100503	0.132434	NA	FALSE	FALSE	FALSE	EBI-a-GCST002318	13	51710956	0.6	0.0264414	57284	EBI-a-GCST002318	TRUE	reported	13	51136820	0.0223658	5.44436e-06	8200	3-methyl-2-oxovalerate to 3-methyl-2-oxobutyrate ratio	TRUE	reported	q8zH8G	0.00251491	20.6692	2	1	TRUE
rs12676561	C	T	C	T	-0.0736734	0.0202027	0.308162	NA	FALSE	FALSE	FALSE	EBI-a-GCST002318	8	134977914	0.24	0.0158625	57284	EBI-a-GCST002318	TRUE	reported	8	133965671	0.0164069	7.1094e-06	8200	3-methyl-2-oxovalerate to 3-methyl-2-oxobutyrate ratio	TRUE	reported	q8zH8G	0.00245295	20.1587	2	1	TRUE
rs140189036	C	T	C	T	0.20402	0.0100503	0.0285872	NA	FALSE	FALSE	FALSE	EBI-a-GCST002318	6	166801595	0.87	0.0659244	57284	EBI-a-GCST002318	TRUE	reported	6	166388107	0.0457611	8.25831e-06	8200	3-methyl-2-oxovalerate to 3-methyl-2-oxobutyrate ratio	TRUE	reported	q8zH8G	0.00241817	19.8722	2	1	TRUE
rs140845471	G	A	G	A	-0.243385	0	0.0207387	NA	FALSE	FALSE	FALSE	EBI-a-GCST002318	1	218014202	0.99	0.0769505	57284	EBI-a-GCST002318	TRUE	reported	1	217840860	0.0530137	4.4115e-06	8200	3-methyl-2-oxovalerate to 3-methyl-2-oxobutyrate ratio	TRUE	reported	q8zH8G	0.00256379	21.072	2	1	TRUE
rs147577716	A	G	A	G	-0.140896	-0.0512933	0.0622859	NA	FALSE	FALSE	FALSE	EBI-a-GCST002318	5	40337596	0.0299999	0.0210423	57284	EBI-a-GCST002318	TRUE	reported	5	40337494	0.0313165	6.82448e-06	8200	3-methyl-2-oxovalerate to 3-methyl-2-oxobutyrate ratio	TRUE	reported	q8zH8G	0.00246244	20.2369	2	1	TRUE
rs17697795	A	G	A	G	-0.0740641	0.0295588	0.326638	NA	FALSE	FALSE	FALSE	EBI-a-GCST002318	16	87159799	0.15	0.014648	57284	EBI-a-GCST002318	TRUE	reported	16	87126193	0.0164114	6.39252e-06	8200	3-methyl-2-oxovalerate to 3-methyl-2-oxobutyrate ratio	TRUE	reported	q8zH8G	0.00247761	20.3619	2	1	TRUE
rs2164029	G	A	G	A	-0.0763181	-0.00995033	0.369143	NA	FALSE	FALSE	FALSE	EBI-a-GCST002318	18	20831009	0.34	0.0102044	57284	EBI-a-GCST002318	TRUE	reported	18	23251045	0.0160576	2.0066e-06	8200	3-methyl-2-oxovalerate to 3-methyl-2-oxobutyrate ratio	TRUE	reported	q8zH8G	0.00274717	22.5833	2	1	TRUE
rs4847350	C	T	C	T	-0.0726322	0.0100503	0.343336	NA	FALSE	FALSE	FALSE	EBI-a-GCST002318	1	95190365	0.56	0.0156998	57284	EBI-a-GCST002318	TRUE	reported	1	94724809	0.0160796	6.27065e-06	8200	3-methyl-2-oxovalerate to 3-methyl-2-oxobutyrate ratio	TRUE	reported	q8zH8G	0.00248207	20.3987	2	1	TRUE
rs55714514	C	T	C	T	-0.0859672	-0.0198026	0.806544	NA	FALSE	FALSE	FALSE	EBI-a-GCST002318	9	86658762	0.44	0.0256438	57284	EBI-a-GCST002318	TRUE	reported	9	84043847	0.0193239	8.63728e-06	8200	3-methyl-2-oxovalerate to 3-methyl-2-oxobutyrate ratio	TRUE	reported	q8zH8G	0.00240777	19.7865	2	1	TRUE
rs56299996	C	T	C	T	0.114589	-0.00995033	0.103744	NA	FALSE	FALSE	FALSE	EBI-a-GCST002318	12	86337109	0.73	0.0312467	57284	EBI-a-GCST002318	TRUE	reported	12	85943330	0.0247027	3.50579e-06	8200	3-methyl-2-oxovalerate to 3-methyl-2-oxobutyrate ratio	TRUE	reported	q8zH8G	0.00261725	21.5125	2	1	TRUE
rs72695489	C	T	C	T	0.0995737	0	0.158553	NA	FALSE	FALSE	FALSE	EBI-a-GCST002318	14	82464443	0.85	0.02617	57284	EBI-a-GCST002318	TRUE	reported	14	81998099	0.0210433	2.22497e-06	8200	3-methyl-2-oxovalerate to 3-methyl-2-oxobutyrate ratio	TRUE	reported	q8zH8G	0.0027231	22.3849	2	1	TRUE
rs76665747	A	G	A	G	-0.166812	0.0487902	0.0454212	NA	FALSE	FALSE	FALSE	EBI-a-GCST002318	7	76957153	0.19	0.037463	57284	EBI-a-GCST002318	TRUE	reported	7	77327836	0.0359952	3.58181e-06	8200	3-methyl-2-oxovalerate to 3-methyl-2-oxobutyrate ratio	TRUE	reported	q8zH8G	0.00261226	21.4714	2	1	TRUE
rs78177403	C	A	C	A	0.321817	-0.0392207	0.0192331	NA	FALSE	FALSE	FALSE	EBI-a-GCST002318	1	108015234	0.33	0.0408381	57284	EBI-a-GCST002318	TRUE	reported	1	107472612	0.0549034	4.58653e-09	8200	3-methyl-2-oxovalerate to 3-methyl-2-oxobutyrate ratio	TRUE	reported	q8zH8G	0.00417244	34.349	2	1	TRUE
rs79434713	A	C	A	C	-0.151492	-0.0833816	0.0538674	NA	FALSE	FALSE	FALSE	EBI-a-GCST002318	19	6700982	0.48	0.122646	57284	EBI-a-GCST002318	TRUE	reported	19	6700971	0.0340111	8.42111e-06	8200	3-methyl-2-oxovalerate to 3-methyl-2-oxobutyrate ratio	TRUE	reported	q8zH8G	0.00241365	19.835	2	1	TRUE
rs10005620	A	C	A	C	0.0863954	0.00995033	0.196623	NA	FALSE	FALSE	FALSE	EBI-a-GCST002318	4	53622471	0.77	0.0198162	57284	EBI-a-GCST002318	TRUE	reported	4	52756304	0.019471	9.11692e-06	7982	X-21471 levels	TRUE	reported	nXATsE	0.0024605	19.6832	2	1	TRUE
rs1057868	T	C	T	C	0.081922	0.0487902	0.283896	NA	FALSE	FALSE	FALSE	EBI-a-GCST002318	7	75615006	0.00309999	0.0190753	57284	EBI-a-GCST002318	TRUE	reported	7	75985688	0.0171193	1.70673e-06	7982	X-21471 levels	TRUE	reported	nXATsE	0.00286071	22.8939	2	1	TRUE
rs116576599	T	C	T	C	0.151742	0	0.058263	NA	FALSE	FALSE	FALSE	EBI-a-GCST002318	16	80870655	0.99	0.0486276	57284	EBI-a-GCST002318	TRUE	reported	16	80836758	0.0332013	4.86864e-06	7982	X-21471 levels	TRUE	reported	nXATsE	0.00261009	20.883	2	1	TRUE
rs117222455	C	T	C	T	-0.237521	-0.113329	0.022232	NA	FALSE	FALSE	FALSE	EBI-a-GCST002318	7	19303920	0.0350002	0.0527441	57284	EBI-a-GCST002318	TRUE	reported	7	19264297	0.0526376	6.41025e-06	7982	X-21471 levels	TRUE	reported	nXATsE	0.00254445	20.3565	2	1	TRUE
rs117988718	A	G	A	G	0.233337	-0.040822	0.0227933	NA	FALSE	FALSE	FALSE	EBI-a-GCST002318	7	49251249	0.67	0.096552	57284	EBI-a-GCST002318	TRUE	reported	7	49211653	0.0520922	7.48857e-06	7982	X-21471 levels	TRUE	reported	nXATsE	0.00250738	20.0592	2	1	TRUE
rs1260333	G	A	G	A	-0.0833185	0	0.541269	NA	FALSE	FALSE	FALSE	EBI-a-GCST002318	2	27748624	0.83	0.0155404	57284	EBI-a-GCST002318	TRUE	reported	2	27525757	0.0155065	7.73736e-08	7982	X-21471 levels	TRUE	reported	nXATsE	0.00360392	28.8633	2	1	TRUE
rs148544135	G	A	G	A	0.333838	0.0618754	0.010363	NA	FALSE	FALSE	FALSE	EBI-a-GCST002318	14	77428125	0.630001	0.122056	57284	EBI-a-GCST002318	TRUE	reported	14	76961782	0.0753431	9.38383e-06	7982	X-21471 levels	TRUE	reported	nXATsE	0.00245361	19.628	2	1	TRUE
rs212100	C	T	C	T	0.331612	0.0304592	0.841223	NA	FALSE	FALSE	FALSE	EBI-a-GCST002318	19	48376995	0.27	0.0270012	57284	EBI-a-GCST002318	TRUE	reported	19	47873738	0.0210966	1.12539e-55	7982	X-21471 levels	TRUE	reported	nXATsE	0.0300251	247.017	2	1	TRUE
rs2178720	T	C	T	C	-0.084673	0.0198026	0.249968	NA	FALSE	FALSE	FALSE	EBI-a-GCST002318	16	7269847	0.33	0.0147896	57284	EBI-a-GCST002318	TRUE	reported	16	7219846	0.0179583	2.4174e-06	7982	X-21471 levels	TRUE	reported	nXATsE	0.00277741	22.2255	2	1	TRUE
rs3789505	T	C	T	C	0.171932	-0.0100503	0.0442048	NA	FALSE	FALSE	FALSE	EBI-a-GCST002318	1	6342345	0.66	0.0300207	57284	EBI-a-GCST002318	TRUE	reported	1	6282285	0.0375928	4.79544e-06	7982	X-21471 levels	TRUE	reported	nXATsE	0.0026137	20.912	2	1	TRUE
rs6876434	C	T	C	T	0.0889546	-0.00995033	0.704043	NA	FALSE	FALSE	FALSE	EBI-a-GCST002318	5	54317840	0.79	0.0206171	57284	EBI-a-GCST002318	TRUE	reported	5	55022012	0.0174087	3.22557e-07	7982	X-21471 levels	TRUE	reported	nXATsE	0.00326042	26.1033	2	1	TRUE
rs72838129	C	T	C	T	-0.580097	0.0304592	0.0572486	NA	FALSE	FALSE	FALSE	EBI-a-GCST002318	10	101604481	0.52	0.0439156	57284	EBI-a-GCST002318	TRUE	reported	10	99844724	0.0327696	4.0247e-70	7982	X-21471 levels	TRUE	reported	nXATsE	0.0377766	313.293	2	1	TRUE
rs75369470	T	C	T	C	0.230255	-0.0304592	0.0240918	NA	FALSE	FALSE	FALSE	EBI-a-GCST002318	16	10197951	0.62	0.0687853	57284	EBI-a-GCST002318	TRUE	reported	16	10104094	0.0503223	4.74838e-06	7982	X-21471 levels	TRUE	reported	nXATsE	0.00261606	20.9309	2	1	TRUE
rs7713886	T	C	T	C	-0.0945293	-0.0202027	0.801235	NA	FALSE	FALSE	FALSE	EBI-a-GCST002318	5	148025158	0.42	0.0253885	57284	EBI-a-GCST002318	TRUE	reported	5	148645595	0.0200122	2.31723e-06	7982	X-21471 levels	TRUE	reported	nXATsE	0.00278753	22.3067	2	1	TRUE
rs841217	C	T	C	T	-0.0767432	0.0100503	0.534665	NA	FALSE	FALSE	FALSE	EBI-a-GCST002318	16	4746392	0.61	0.0156998	57284	EBI-a-GCST002318	TRUE	reported	16	4696391	0.0157658	1.12908e-06	7982	X-21471 levels	TRUE	reported	nXATsE	0.00295971	23.6886	2	1	TRUE
rs10005957	T	C	T	C	-0.184216	-0.0304592	0.0416212	NA	FALSE	FALSE	FALSE	EBI-a-GCST002318	4	114258996	0.25	0.0256438	57284	EBI-a-GCST002318	TRUE	reported	4	113337840	0.0378129	1.10597e-06	8260	Hydroxypalmitoyl sphingomyelin (d18:1/16:0(OH)) levels	TRUE	reported	I5s8E7	0.00286516	23.7285	2	1	TRUE
rs113583332	A	G	A	G	0.193077	-0.040822	0.0355654	NA	FALSE	FALSE	FALSE	EBI-a-GCST002318	11	92855082	0.53	0.0694552	57284	EBI-a-GCST002318	TRUE	reported	11	93121916	0.0408548	2.29073e-06	8260	Hydroxypalmitoyl sphingomyelin (d18:1/16:0(OH)) levels	TRUE	reported	I5s8E7	0.00269663	22.329	2	1	TRUE
rs12338432	C	T	C	T	-0.276198	-0.076961	0.0147291	NA	FALSE	FALSE	FALSE	EBI-a-GCST002318	9	23133105	0.35	0.0818075	57284	EBI-a-GCST002318	TRUE	reported	9	23133106	0.0625174	9.96423e-06	8260	Hydroxypalmitoyl sphingomyelin (d18:1/16:0(OH)) levels	TRUE	reported	I5s8E7	0.0023574	19.5135	2	1	TRUE
rs1260326	C	T	C	T	0.0849292	0.0100503	0.587611	NA	FALSE	FALSE	FALSE	EBI-a-GCST002318	2	27730940	0.57	0.0104127	57284	EBI-a-GCST002318	TRUE	reported	2	27508073	0.0153285	3.01404e-08	8260	Hydroxypalmitoyl sphingomyelin (d18:1/16:0(OH)) levels	TRUE	reported	I5s8E7	0.00370274	30.6909	2	1	TRUE
rs1461729	G	A	G	A	0.110054	-0.0198026	0.89731	NA	FALSE	FALSE	FALSE	EBI-a-GCST002318	8	9187242	0.46	0.0256438	57284	EBI-a-GCST002318	TRUE	reported	8	9329732	0.0248065	9.143e-06	8260	Hydroxypalmitoyl sphingomyelin (d18:1/16:0(OH)) levels	TRUE	reported	I5s8E7	0.00237721	19.6778	2	1	TRUE
rs17159433	G	A	G	A	0.259131	0.0100503	0.0176035	NA	FALSE	FALSE	FALSE	EBI-a-GCST002318	7	84522476	0.649999	0.0264414	57284	EBI-a-GCST002318	TRUE	reported	7	84893160	0.0574328	6.42494e-06	8260	Hydroxypalmitoyl sphingomyelin (d18:1/16:0(OH)) levels	TRUE	reported	I5s8E7	0.0024585	20.3523	2	1	TRUE
rs174568	T	C	T	C	0.281473	-0.040822	0.338794	NA	FALSE	FALSE	FALSE	EBI-a-GCST002318	11	61593816	0.0015	0.01052	57284	EBI-a-GCST002318	TRUE	reported	11	61826344	0.0156069	1.03188e-72	8260	Hydroxypalmitoyl sphingomyelin (d18:1/16:0(OH)) levels	TRUE	reported	I5s8E7	0.0378867	325.188	2	1	TRUE
rs2117347	C	T	C	T	0.0697622	0	0.489268	NA	FALSE	FALSE	FALSE	EBI-a-GCST002318	7	1557967	0.79	0.0155404	57284	EBI-a-GCST002318	TRUE	reported	7	1518331	0.0150425	3.5234e-06	8260	Hydroxypalmitoyl sphingomyelin (d18:1/16:0(OH)) levels	TRUE	reported	I5s8E7	0.00259711	21.5028	2	1	TRUE
rs2240466	A	G	A	G	0.11771	-0.0304592	0.119411	NA	FALSE	FALSE	FALSE	EBI-a-GCST002318	7	72856269	0.14	0.0206171	57284	EBI-a-GCST002318	TRUE	reported	7	73441939	0.0230896	3.43328e-07	8260	Hydroxypalmitoyl sphingomyelin (d18:1/16:0(OH)) levels	TRUE	reported	I5s8E7	0.00313653	25.983	2	1	TRUE
rs2315065	A	C	A	C	0.129803	0.0295588	0.0876365	NA	FALSE	FALSE	FALSE	EBI-a-GCST002318	6	161108144	0.69	0.0606435	57284	EBI-a-GCST002318	TRUE	reported	6	160687112	0.0268117	1.28997e-06	8260	Hydroxypalmitoyl sphingomyelin (d18:1/16:0(OH)) levels	TRUE	reported	I5s8E7	0.0028295	23.4323	2	1	TRUE
rs2433416	T	C	T	C	-0.0746174	0	0.300988	NA	FALSE	FALSE	FALSE	EBI-a-GCST002318	11	86412880	0.89	0.015081	57284	EBI-a-GCST002318	TRUE	reported	11	86701838	0.0163138	4.78767e-06	8260	Hydroxypalmitoyl sphingomyelin (d18:1/16:0(OH)) levels	TRUE	reported	I5s8E7	0.00252634	20.9153	2	1	TRUE
rs3736228	T	C	T	C	-0.111867	-0.0202027	0.145273	NA	FALSE	FALSE	FALSE	EBI-a-GCST002318	11	68201295	0.18	0.0153842	57284	EBI-a-GCST002318	TRUE	reported	11	68433827	0.0213966	1.71121e-07	8260	Hydroxypalmitoyl sphingomyelin (d18:1/16:0(OH)) levels	TRUE	reported	I5s8E7	0.00329837	27.3281	2	1	TRUE
rs3756963	C	T	C	T	-0.0846737	-0.0198026	0.247179	NA	FALSE	FALSE	FALSE	EBI-a-GCST002318	6	11022154	0.37	0.0204109	57284	EBI-a-GCST002318	TRUE	reported	6	11021921	0.017413	1.1582e-06	8260	Hydroxypalmitoyl sphingomyelin (d18:1/16:0(OH)) levels	TRUE	reported	I5s8E7	0.00285449	23.6398	2	1	TRUE
rs375938	A	G	A	G	0.0686571	-0.0100503	0.403623	NA	FALSE	FALSE	FALSE	EBI-a-GCST002318	17	15245157	0.630001	0.0152311	57284	EBI-a-GCST002318	TRUE	reported	17	15341840	0.0153336	7.55037e-06	8260	Hydroxypalmitoyl sphingomyelin (d18:1/16:0(OH)) levels	TRUE	reported	I5s8E7	0.00242131	20.0437	2	1	TRUE
rs4742750	A	G	A	G	0.111966	0.0198026	0.143065	NA	FALSE	FALSE	FALSE	EBI-a-GCST002318	9	101725919	0.59	0.0291625	57284	EBI-a-GCST002318	TRUE	reported	9	98963637	0.0214244	1.73139e-07	8260	Hydroxypalmitoyl sphingomyelin (d18:1/16:0(OH)) levels	TRUE	reported	I5s8E7	0.00329565	27.3055	2	1	TRUE
rs482282	A	G	A	G	0.0680071	0	0.506247	NA	FALSE	FALSE	FALSE	EBI-a-GCST002318	18	51765409	0.81	0.015081	57284	EBI-a-GCST002318	TRUE	reported	18	54239039	0.0151632	7.29085e-06	8260	Hydroxypalmitoyl sphingomyelin (d18:1/16:0(OH)) levels	TRUE	reported	I5s8E7	0.00242935	20.1104	2	1	TRUE
rs56052006	A	G	A	G	0.26461	0.0392207	0.0165796	NA	FALSE	FALSE	FALSE	EBI-a-GCST002318	8	125573647	0.649999	0.0979036	57284	EBI-a-GCST002318	TRUE	reported	8	124561406	0.0588982	7.03374e-06	8260	Hydroxypalmitoyl sphingomyelin (d18:1/16:0(OH)) levels	TRUE	reported	I5s8E7	0.00243763	20.1792	2	1	TRUE
rs59771628	C	A	C	A	0.0717336	0.0100503	0.466226	NA	FALSE	FALSE	FALSE	EBI-a-GCST002318	3	100219086	0.7	0.0156998	57284	EBI-a-GCST002318	TRUE	reported	3	100500242	0.0150877	1.99012e-06	8260	Hydroxypalmitoyl sphingomyelin (d18:1/16:0(OH)) levels	TRUE	reported	I5s8E7	0.00272918	22.5992	2	1	TRUE
rs6471322	A	G	A	G	-0.0810044	0.00995033	0.635432	NA	FALSE	FALSE	FALSE	EBI-a-GCST002318	8	93162375	0.630001	0.0198162	57284	EBI-a-GCST002318	TRUE	reported	8	92150147	0.015584	2.01536e-07	8260	Hydroxypalmitoyl sphingomyelin (d18:1/16:0(OH)) levels	TRUE	reported	I5s8E7	0.00326033	27.0118	2	1	TRUE
rs6937870	T	C	T	C	0.0783475	0	0.263694	NA	FALSE	FALSE	FALSE	EBI-a-GCST002318	6	107927883	0.8	0.0200106	57284	EBI-a-GCST002318	TRUE	reported	6	107606679	0.0169493	3.79224e-06	8260	Hydroxypalmitoyl sphingomyelin (d18:1/16:0(OH)) levels	TRUE	reported	I5s8E7	0.00258015	21.362	2	1	TRUE
rs74473137	A	G	A	G	-0.249778	0	0.0199708	NA	FALSE	FALSE	FALSE	EBI-a-GCST002318	6	82287176	0.96	0.0972553	57284	EBI-a-GCST002318	TRUE	reported	6	81577459	0.0536481	3.22636e-06	8260	Hydroxypalmitoyl sphingomyelin (d18:1/16:0(OH)) levels	TRUE	reported	I5s8E7	0.00261747	21.6718	2	1	TRUE
rs79209503	T	C	T	C	-0.221151	0.0295588	0.0246051	NA	FALSE	FALSE	FALSE	EBI-a-GCST002318	7	25967928	0.73	0.0693651	57284	EBI-a-GCST002318	TRUE	reported	7	25928308	0.0485036	5.12829e-06	8260	Hydroxypalmitoyl sphingomyelin (d18:1/16:0(OH)) levels	TRUE	reported	I5s8E7	0.00251049	20.7838	2	1	TRUE
rs80321804	G	A	G	A	-0.177044	0.0202027	0.037356	NA	FALSE	FALSE	FALSE	EBI-a-GCST002318	1	35224842	0.760001	0.0549136	57284	EBI-a-GCST002318	TRUE	reported	1	34759241	0.0393603	6.85855e-06	8260	Hydroxypalmitoyl sphingomyelin (d18:1/16:0(OH)) levels	TRUE	reported	I5s8E7	0.00244345	20.2274	2	1	TRUE
rs9502890	C	A	C	A	0.202193	0	0.971552	NA	FALSE	FALSE	FALSE	EBI-a-GCST002318	6	1313121	0.93	0.02617	57284	EBI-a-GCST002318	TRUE	reported	6	1312886	0.0450345	7.13102e-06	8260	Hydroxypalmitoyl sphingomyelin (d18:1/16:0(OH)) levels	TRUE	reported	I5s8E7	0.00243446	20.1528	2	1	TRUE
rs10006032	G	A	G	A	-0.15194	-0.0295588	0.0573319	NA	FALSE	FALSE	FALSE	EBI-a-GCST002318	4	160840985	0.56	0.0521069	57284	EBI-a-GCST002318	TRUE	reported	4	159919833	0.0334117	5.42817e-06	8212	1-linoleoylglycerol (18:2) levels	TRUE	reported	lBFPAs	0.00251192	20.6748	2	1	TRUE
rs10072491	T	C	T	C	-0.17568	0.00995033	0.0420795	NA	FALSE	FALSE	FALSE	EBI-a-GCST002318	5	4715497	0.82	0.0341891	57284	EBI-a-GCST002318	TRUE	reported	5	4715384	0.038446	4.88843e-06	8212	1-linoleoylglycerol (18:2) levels	TRUE	reported	lBFPAs	0.00253624	20.8755	2	1	TRUE
rs11033752	T	C	T	C	-0.0907355	0.0198026	0.17797	NA	FALSE	FALSE	FALSE	EBI-a-GCST002318	11	36729709	0.33	0.0196257	57284	EBI-a-GCST002318	TRUE	reported	11	36708159	0.0204967	9.56226e-06	8212	1-linoleoylglycerol (18:2) levels	TRUE	reported	lBFPAs	0.00238069	19.5921	2	1	TRUE
rs114473062	T	C	T	C	0.226158	-0.0512933	0.025608	NA	FALSE	FALSE	FALSE	EBI-a-GCST002318	4	32421085	0.61	0.0974772	57284	EBI-a-GCST002318	TRUE	reported	4	32419463	0.049117	4.135e-06	8212	1-linoleoylglycerol (18:2) levels	TRUE	reported	lBFPAs	0.00257508	21.196	2	1	TRUE
rs114705742	A	G	A	G	0.28799	-0.235722	0.0157831	NA	FALSE	FALSE	FALSE	EBI-a-GCST002318	2	111828347	0.0530005	0.120266	57284	EBI-a-GCST002318	TRUE	reported	2	111070770	0.0624623	4.01461e-06	8212	1-linoleoylglycerol (18:2) levels	TRUE	reported	lBFPAs	0.00258195	21.2526	2	1	TRUE
rs117168942	C	T	C	T	0.191261	-0.076961	0.0332722	NA	FALSE	FALSE	FALSE	EBI-a-GCST002318	10	21990316	0.21	0.0600934	57284	EBI-a-GCST002318	TRUE	reported	10	21701387	0.0431454	9.29617e-06	8212	1-linoleoylglycerol (18:2) levels	TRUE	reported	lBFPAs	0.00238724	19.6462	2	1	TRUE
rs12447287	C	T	C	T	0.081903	-0.00995033	0.245284	NA	FALSE	FALSE	FALSE	EBI-a-GCST002318	16	56937998	0.75	0.0206171	57284	EBI-a-GCST002318	TRUE	reported	16	56904086	0.0180828	5.91739e-06	8212	1-linoleoylglycerol (18:2) levels	TRUE	reported	lBFPAs	0.00249193	20.5098	2	1	TRUE
rs12858688	T	C	T	C	-0.22125	0	0.0249358	NA	FALSE	FALSE	FALSE	EBI-a-GCST002318	13	70356464	0.99	0.105619	57284	EBI-a-GCST002318	TRUE	reported	13	69782332	0.0491192	6.65784e-06	8212	1-linoleoylglycerol (18:2) levels	TRUE	reported	lBFPAs	0.00246458	20.2842	2	1	TRUE
rs17070236	G	A	G	A	-0.0699853	0.0202027	0.434985	NA	FALSE	FALSE	FALSE	EBI-a-GCST002318	13	61836793	0.22	0.0158625	57284	EBI-a-GCST002318	TRUE	reported	13	61262660	0.0156632	7.88997e-06	8212	1-linoleoylglycerol (18:2) levels	TRUE	reported	lBFPAs	0.00242521	19.9594	2	1	TRUE
rs17410962	A	G	A	G	-0.11411	0.00995033	0.120383	NA	FALSE	FALSE	FALSE	EBI-a-GCST002318	8	19848080	0.56	0.0198162	57284	EBI-a-GCST002318	TRUE	reported	8	19990569	0.0235805	1.30378e-06	8212	1-linoleoylglycerol (18:2) levels	TRUE	reported	lBFPAs	0.00284352	23.4118	2	1	TRUE
rs2943179	T	C	T	C	-0.0822174	0.00995033	0.221974	NA	FALSE	FALSE	FALSE	EBI-a-GCST002318	8	88125316	0.54	0.0246523	57284	EBI-a-GCST002318	TRUE	reported	8	87113088	0.0185161	8.98228e-06	8212	1-linoleoylglycerol (18:2) levels	TRUE	reported	lBFPAs	0.00239518	19.7116	2	1	TRUE
rs56354314	A	G	A	G	0.235446	-0.040822	0.022346	NA	FALSE	FALSE	FALSE	EBI-a-GCST002318	12	106673935	0.649999	0.0831835	57284	EBI-a-GCST002318	TRUE	reported	12	106280157	0.0519464	5.82959e-06	8212	1-linoleoylglycerol (18:2) levels	TRUE	reported	lBFPAs	0.00249539	20.5384	2	1	TRUE
rs62385039	G	A	G	A	-0.258001	-0.076961	0.0201079	NA	FALSE	FALSE	FALSE	EBI-a-GCST002318	6	895420	0.33	0.0818075	57284	EBI-a-GCST002318	TRUE	reported	6	895419	0.0552286	2.98985e-06	8212	1-linoleoylglycerol (18:2) levels	TRUE	reported	lBFPAs	0.00265041	21.8177	2	1	TRUE
rs75445316	T	C	T	C	0.241198	0.300105	0.024875	NA	FALSE	FALSE	FALSE	EBI-a-GCST002318	2	115033746	0.0569994	0.15799	57284	EBI-a-GCST002318	TRUE	reported	2	114276169	0.049473	1.0862e-06	8212	1-linoleoylglycerol (18:2) levels	TRUE	reported	lBFPAs	0.00288607	23.7632	2	1	TRUE
rs77982886	G	A	G	A	0.316857	0	0.0152346	NA	FALSE	FALSE	FALSE	EBI-a-GCST002318	4	64972393	0.99	0.17474	57284	EBI-a-GCST002318	TRUE	reported	4	64106675	0.0635267	6.10775e-07	8212	1-linoleoylglycerol (18:2) levels	TRUE	reported	lBFPAs	0.00302031	24.8719	2	1	TRUE
rs9894638	C	T	C	T	0.0857298	-0.0198026	0.211593	NA	FALSE	FALSE	FALSE	EBI-a-GCST002318	17	44912901	0.25	0.0152311	57284	EBI-a-GCST002318	TRUE	reported	17	46835535	0.0192292	8.2607e-06	8212	1-linoleoylglycerol (18:2) levels	TRUE	reported	lBFPAs	0.00241458	19.8717	2	1	TRUE
rs10006132	A	G	A	G	0.106176	-0.0202027	0.813906	NA	FALSE	FALSE	FALSE	EBI-a-GCST002318	4	114743647	0.34	0.0253885	57284	EBI-a-GCST002318	TRUE	reported	4	113822491	0.0198888	9.37219e-08	8255	X-12680 levels	TRUE	reported	7W1iLn	0.0034405	28.4925	2	1	TRUE
rs10066747	C	T	C	T	0.0855072	0	0.197322	NA	FALSE	FALSE	FALSE	EBI-a-GCST002318	5	168270244	0.86	0.0155404	57284	EBI-a-GCST002318	TRUE	reported	5	168843239	0.0191468	7.97423e-06	8255	X-12680 levels	TRUE	reported	7W1iLn	0.00241017	19.9392	2	1	TRUE
rs113949763	A	G	A	G	-0.0880563	-0.0100503	0.182187	NA	FALSE	FALSE	FALSE	EBI-a-GCST002318	1	106546416	0.780001	0.0300207	57284	EBI-a-GCST002318	TRUE	reported	1	106003794	0.019815	8.83339e-06	8255	X-12680 levels	TRUE	reported	7W1iLn	0.00238659	19.7437	2	1	TRUE
rs11790084	T	C	T	C	-0.116759	0.00995033	0.11494	NA	FALSE	FALSE	FALSE	EBI-a-GCST002318	9	466528	0.77	0.0198162	57284	EBI-a-GCST002318	TRUE	reported	9	466528	0.0239886	1.13151e-06	8255	X-12680 levels	TRUE	reported	7W1iLn	0.0028616	23.6846	2	1	TRUE
rs1232965	G	A	G	A	0.125759	0.0100503	0.899571	NA	FALSE	FALSE	FALSE	EBI-a-GCST002318	12	47960471	0.84	0.0210423	57284	EBI-a-GCST002318	TRUE	reported	12	47566688	0.0257188	1.00949e-06	8255	X-12680 levels	TRUE	reported	7W1iLn	0.00288804	23.9041	2	1	TRUE
rs12438406	C	T	C	T	0.0880515	-0.00995033	0.192031	NA	FALSE	FALSE	FALSE	EBI-a-GCST002318	15	61069471	0.57	0.0206171	57284	EBI-a-GCST002318	TRUE	reported	15	60777272	0.0198886	9.54517e-06	8255	X-12680 levels	TRUE	reported	7W1iLn	0.00236874	19.5957	2	1	TRUE
rs1323591	C	T	C	T	-0.0792506	0.0100503	0.661126	NA	FALSE	FALSE	FALSE	EBI-a-GCST002318	9	8456020	0.68	0.0210423	57284	EBI-a-GCST002318	TRUE	reported	9	8456020	0.0168826	2.6763e-06	8255	X-12680 levels	TRUE	reported	7W1iLn	0.00266227	22.0303	2	1	TRUE
rs201928	T	C	T	C	0.0707048	0.00995033	0.413	NA	FALSE	FALSE	FALSE	EBI-a-GCST002318	20	17524903	0.7	0.0149339	57284	EBI-a-GCST002318	TRUE	reported	20	17544258	0.0156961	6.64943e-06	8255	X-12680 levels	TRUE	reported	7W1iLn	0.00245206	20.2866	2	1	TRUE
rs468720	A	G	A	G	0.0807866	0.00995033	0.697158	NA	FALSE	FALSE	FALSE	EBI-a-GCST002318	13	56685870	0.57	0.0149339	57284	EBI-a-GCST002318	TRUE	reported	13	56111736	0.0169477	1.87164e-06	8255	X-12680 levels	TRUE	reported	7W1iLn	0.00274502	22.717	2	1	TRUE
rs62	C	T	C	T	-0.0719258	0	0.518744	NA	FALSE	FALSE	FALSE	EBI-a-GCST002318	7	11621157	0.93	0.0155404	57284	EBI-a-GCST002318	TRUE	reported	7	11581530	0.0161188	8.11101e-06	8255	X-12680 levels	TRUE	reported	7W1iLn	0.00240625	19.9067	2	1	TRUE
rs62278649	A	G	A	G	-0.0812349	0	0.40421	NA	FALSE	FALSE	FALSE	EBI-a-GCST002318	3	157166855	0.81	0.015081	57284	EBI-a-GCST002318	TRUE	reported	3	157449066	0.0161594	4.97939e-07	8255	X-12680 levels	TRUE	reported	7W1iLn	0.00305204	25.2656	2	1	TRUE
rs6888519	C	T	C	T	-0.181717	0.0304592	0.0387277	NA	FALSE	FALSE	FALSE	EBI-a-GCST002318	5	172171643	0.55	0.0496807	57284	EBI-a-GCST002318	TRUE	reported	5	172744640	0.0397152	4.75097e-06	8255	X-12680 levels	TRUE	reported	7W1iLn	0.00252965	20.9302	2	1	TRUE
rs73164485	T	C	T	C	0.200171	-0.0304592	0.0424964	NA	FALSE	FALSE	FALSE	EBI-a-GCST002318	13	22602733	0.6	0.0548063	57284	EBI-a-GCST002318	TRUE	reported	13	22028594	0.0381791	1.58034e-07	8255	X-12680 levels	TRUE	reported	7W1iLn	0.00331887	27.4818	2	1	TRUE
rs75693448	T	C	T	C	-0.118346	-0.0304592	0.106522	NA	FALSE	FALSE	FALSE	EBI-a-GCST002318	19	16995072	0.42	0.0404334	57284	EBI-a-GCST002318	TRUE	reported	19	16884261	0.0250911	2.39758e-06	8255	X-12680 levels	TRUE	reported	7W1iLn	0.00268771	22.2414	2	1	TRUE
rs10006723	T	G	T	G	0.170956	-0.127833	0.052858	NA	FALSE	FALSE	FALSE	EBI-a-GCST002318	4	102673734	0.0379997	0.0600934	57284	EBI-a-GCST002318	TRUE	reported	4	101752577	0.0345341	7.40711e-07	8192	Carnitine levels	TRUE	reported	qa4mJQ	0.00298253	24.5	2	1	TRUE
rs10900223	C	T	C	T	-0.105448	0.0100503	0.250122	NA	FALSE	FALSE	FALSE	EBI-a-GCST002318	10	46021631	0.42	0.0210423	57284	EBI-a-GCST002318	TRUE	reported	10	45526183	0.0176162	2.15271e-09	8192	Carnitine levels	TRUE	reported	qa4mJQ	0.00435479	35.8217	2	1	TRUE
rs1171617	T	G	T	G	0.443332	-0.0100503	0.770118	NA	FALSE	FALSE	FALSE	EBI-a-GCST002318	10	61467182	0.66	0.0251383	57284	EBI-a-GCST002318	TRUE	reported	10	59707424	0.0179927	4.75726e-134	8192	Carnitine levels	TRUE	reported	qa4mJQ	0.0689965	606.959	2	1	TRUE
rs11871125	T	C	T	C	0.072665	-0.0100503	0.394949	NA	FALSE	FALSE	FALSE	EBI-a-GCST002318	17	19432393	0.58	0.0202087	57284	EBI-a-GCST002318	TRUE	reported	17	19529080	0.0157893	4.1814e-06	8192	Carnitine levels	TRUE	reported	qa4mJQ	0.00257878	21.1748	2	1	TRUE
rs13026148	A	G	A	G	-0.0706059	0	0.378223	NA	FALSE	FALSE	FALSE	EBI-a-GCST002318	2	215514568	0.97	0.0200106	57284	EBI-a-GCST002318	TRUE	reported	2	214649844	0.0158653	8.57356e-06	8192	Carnitine levels	TRUE	reported	qa4mJQ	0.00241183	19.8006	2	1	TRUE
rs13247874	T	C	T	C	-0.103668	-0.0202027	0.190234	NA	FALSE	FALSE	FALSE	EBI-a-GCST002318	7	73010442	0.23	0.0153842	57284	EBI-a-GCST002318	TRUE	reported	7	73596112	0.0195859	1.20324e-07	8192	Carnitine levels	TRUE	reported	qa4mJQ	0.00340824	28.0089	2	1	TRUE
rs13357247	T	C	T	C	-0.198899	-0.0833816	0.0499694	NA	FALSE	FALSE	FALSE	EBI-a-GCST002318	5	130137357	0.0599998	0.0425416	57284	EBI-a-GCST002318	TRUE	reported	5	130801664	0.0349697	1.28725e-08	8192	Carnitine levels	TRUE	reported	qa4mJQ	0.00393351	32.3426	2	1	TRUE
rs147117425	A	G	A	G	-0.388454	-0.127833	0.0247004	NA	FALSE	FALSE	FALSE	EBI-a-GCST002318	5	130890358	0.14	0.0852317	57284	EBI-a-GCST002318	TRUE	reported	5	131554665	0.0488147	1.75219e-15	8192	Carnitine levels	TRUE	reported	qa4mJQ	0.00767085	63.3099	2	1	TRUE
rs147994823	A	G	A	G	-0.246641	0.113329	0.0200171	NA	FALSE	FALSE	FALSE	EBI-a-GCST002318	5	129567037	0.18	0.0876787	57284	EBI-a-GCST002318	TRUE	reported	5	130231344	0.0542227	5.3986e-06	8192	Carnitine levels	TRUE	reported	qa4mJQ	0.00251932	20.6853	2	1	TRUE
rs149235996	G	A	G	A	-0.56909	0.0202027	0.0120372	NA	FALSE	FALSE	FALSE	EBI-a-GCST002318	5	150719909	0.92	0.186459	57284	EBI-a-GCST002318	TRUE	reported	5	151340348	0.0700396	4.46387e-16	8192	Carnitine levels	TRUE	reported	qa4mJQ	0.00799464	66.0037	2	1	TRUE
rs1511808	T	C	T	C	-0.0697692	0	0.615503	NA	FALSE	FALSE	FALSE	EBI-a-GCST002318	4	189345908	0.98	0.015081	57284	EBI-a-GCST002318	TRUE	reported	4	188424754	0.0157378	9.28299e-06	8192	Carnitine levels	TRUE	reported	qa4mJQ	0.00239336	19.6487	2	1	TRUE
rs1765260	A	G	A	G	-0.0999797	-0.0100503	0.153343	NA	FALSE	FALSE	FALSE	EBI-a-GCST002318	15	79866347	0.75	0.0251383	57284	EBI-a-GCST002318	TRUE	reported	15	79574005	0.0211507	2.27832e-06	8192	Carnitine levels	TRUE	reported	qa4mJQ	0.0027202	22.3392	2	1	TRUE
rs2512510	A	G	A	G	-0.0870239	-0.0304592	0.216759	NA	FALSE	FALSE	FALSE	EBI-a-GCST002318	11	80113567	0.1	0.0206171	57284	EBI-a-GCST002318	TRUE	reported	11	80402523	0.0186419	3.03877e-06	8192	Carnitine levels	TRUE	reported	qa4mJQ	0.0026531	21.7867	2	1	TRUE
rs2625939	T	C	T	C	0.0859678	-0.0100503	0.228206	NA	FALSE	FALSE	FALSE	EBI-a-GCST002318	12	95017410	0.8	0.0251383	57284	EBI-a-GCST002318	TRUE	reported	12	94623634	0.0183528	2.81073e-06	8192	Carnitine levels	TRUE	reported	qa4mJQ	0.00267126	21.9362	2	1	TRUE
rs3781098	T	G	T	G	0.150913	-0.0100503	0.0536283	NA	FALSE	FALSE	FALSE	EBI-a-GCST002318	10	27304609	0.6	0.0202087	57284	EBI-a-GCST002318	TRUE	reported	10	27015680	0.0341624	9.98486e-06	8192	Carnitine levels	TRUE	reported	qa4mJQ	0.00237648	19.5097	2	1	TRUE
rs55775057	A	G	A	G	-0.0960378	-0.0202027	0.150493	NA	FALSE	FALSE	FALSE	EBI-a-GCST002318	11	20167908	0.53	0.0303181	57284	EBI-a-GCST002318	TRUE	reported	11	20146362	0.0215564	8.38207e-06	8192	Carnitine levels	TRUE	reported	qa4mJQ	0.00241708	19.8438	2	1	TRUE
rs6948330	C	T	C	T	0.124109	-0.0953102	0.0898691	NA	FALSE	FALSE	FALSE	EBI-a-GCST002318	7	64056732	0.00690001	0.0335466	57284	EBI-a-GCST002318	TRUE	reported	7	64596354	0.0267901	3.61045e-06	8192	Carnitine levels	TRUE	reported	qa4mJQ	0.00261295	21.4562	2	1	TRUE
rs72836546	T	C	T	C	-0.0906795	0	0.23482	NA	FALSE	FALSE	FALSE	EBI-a-GCST002318	6	14093319	0.86	0.0248929	57284	EBI-a-GCST002318	TRUE	reported	6	14093088	0.0180707	5.22043e-07	8192	Carnitine levels	TRUE	reported	qa4mJQ	0.0030644	25.1746	2	1	TRUE
rs73025372	G	A	G	A	0.157569	0.0100503	0.0515375	NA	FALSE	FALSE	FALSE	EBI-a-GCST002318	3	15314364	0.83	0.0318981	57284	EBI-a-GCST002318	TRUE	reported	3	15272857	0.0346167	5.31831e-06	8192	Carnitine levels	TRUE	reported	qa4mJQ	0.0025228	20.714	2	1	TRUE
rs7537155	A	G	A	G	-0.0900652	-0.0304592	0.199113	NA	FALSE	FALSE	FALSE	EBI-a-GCST002318	1	19206621	0.44	0.035551	57284	EBI-a-GCST002318	TRUE	reported	1	18880127	0.019229	2.81588e-06	8192	Carnitine levels	TRUE	reported	qa4mJQ	0.00267085	21.9328	2	1	TRUE
rs76187828	G	A	G	A	-0.117619	0	0.0930578	NA	FALSE	FALSE	FALSE	EBI-a-GCST002318	10	34051881	0.98	0.02617	57284	EBI-a-GCST002318	TRUE	reported	10	33762953	0.0264472	8.69448e-06	8192	Carnitine levels	TRUE	reported	qa4mJQ	0.00240856	19.7738	2	1	TRUE
rs7705826	G	T	G	T	0.199276	-0.0295588	0.833702	NA	FALSE	FALSE	FALSE	EBI-a-GCST002318	5	131732456	0.0940005	0.0202087	57284	EBI-a-GCST002318	TRUE	reported	5	132396764	0.0204928	2.37787e-22	8192	Carnitine levels	TRUE	reported	qa4mJQ	0.0114112	94.5369	2	1	TRUE
rs78428648	A	G	A	G	0.179162	0.0295588	0.0377174	NA	FALSE	FALSE	FALSE	EBI-a-GCST002318	8	116049077	0.29	0.0288872	57284	EBI-a-GCST002318	TRUE	reported	8	115036848	0.0400467	7.68304e-06	8192	Carnitine levels	TRUE	reported	qa4mJQ	0.0024373	20.0102	2	1	TRUE
rs79717472	G	A	G	A	-0.218081	0.0202027	0.0280471	NA	FALSE	FALSE	FALSE	EBI-a-GCST002318	9	123616161	0.61	0.0378102	57284	EBI-a-GCST002318	TRUE	reported	9	120853883	0.0461728	2.32235e-06	8192	Carnitine levels	TRUE	reported	qa4mJQ	0.00271577	22.3027	2	1	TRUE
rs10006729	G	A	G	A	-0.069881	0.0202027	0.468575	NA	FALSE	FALSE	FALSE	EBI-a-GCST002318	4	148510796	0.24	0.0158625	57284	EBI-a-GCST002318	TRUE	reported	4	147589644	0.0146229	1.76268e-06	8298	Isoleucine to phosphate ratio	TRUE	reported	8OaKyv	0.00274463	22.8321	2	1	TRUE
rs10227729	C	T	C	T	0.097048	0.0202027	0.16595	NA	FALSE	FALSE	FALSE	EBI-a-GCST002318	7	25505757	0.47	0.0212616	57284	EBI-a-GCST002318	TRUE	reported	7	25466138	0.0197725	9.18965e-07	8298	Isoleucine to phosphate ratio	TRUE	reported	8OaKyv	0.00289479	24.0849	2	1	TRUE
rs11066875	T	C	T	C	0.152119	-0.0202027	0.0657736	NA	FALSE	FALSE	FALSE	EBI-a-GCST002318	12	114434848	0.47	0.0253885	57284	EBI-a-GCST002318	TRUE	reported	12	113997043	0.0290453	1.62954e-07	8298	Isoleucine to phosphate ratio	TRUE	reported	8OaKyv	0.00329464	27.4227	2	1	TRUE
rs113979038	A	G	A	G	-0.203458	-0.0618754	0.0368039	NA	FALSE	FALSE	FALSE	EBI-a-GCST002318	9	90495700	0.22	0.0515797	57284	EBI-a-GCST002318	TRUE	reported	9	87880785	0.0384395	1.20367e-07	8298	Isoleucine to phosphate ratio	TRUE	reported	8OaKyv	0.00336478	28.0085	2	1	TRUE
rs114600258	A	G	A	G	0.279245	0.182322	0.0153252	NA	FALSE	FALSE	FALSE	EBI-a-GCST002318	2	241079807	0.2	0.146777	57284	EBI-a-GCST002318	TRUE	reported	2	240140390	0.0589082	2.13364e-06	8298	Isoleucine to phosphate ratio	TRUE	reported	8OaKyv	0.00270067	22.4654	2	1	TRUE
rs11626897	A	G	A	G	0.157981	-0.0833816	0.0526703	NA	FALSE	FALSE	FALSE	EBI-a-GCST002318	14	102879098	0.18	0.0625522	57284	EBI-a-GCST002318	TRUE	reported	14	102412761	0.0328327	1.49652e-06	8298	Isoleucine to phosphate ratio	TRUE	reported	8OaKyv	0.00278236	23.1468	2	1	TRUE
rs11661293	T	C	T	C	0.0931655	-0.040822	0.149473	NA	FALSE	FALSE	FALSE	EBI-a-GCST002318	18	65377835	0.0530005	0.0208275	57284	EBI-a-GCST002318	TRUE	reported	18	67710598	0.0202932	4.41195e-06	8298	Isoleucine to phosphate ratio	TRUE	reported	8OaKyv	0.00253358	21.0719	2	1	TRUE
rs12918636	C	A	C	A	0.106738	0.0202027	0.125459	NA	FALSE	FALSE	FALSE	EBI-a-GCST002318	16	77901144	0.6	0.0267184	57284	EBI-a-GCST002318	TRUE	reported	16	77867247	0.0227824	2.79787e-06	8298	Isoleucine to phosphate ratio	TRUE	reported	8OaKyv	0.00263827	21.9449	2	1	TRUE
rs17558155	A	C	A	C	0.117099	0.0582689	0.0956644	NA	FALSE	FALSE	FALSE	EBI-a-GCST002318	10	9337376	0.08	0.0280917	57284	EBI-a-GCST002318	TRUE	reported	10	9295413	0.0248651	2.48485e-06	8298	Isoleucine to phosphate ratio	TRUE	reported	8OaKyv	0.00266559	22.1728	2	1	TRUE
rs2591078	C	T	C	T	-0.0720375	-0.0392207	0.475678	NA	FALSE	FALSE	FALSE	EBI-a-GCST002318	14	76583775	0.0369999	0.0200106	57284	EBI-a-GCST002318	TRUE	reported	14	76117432	0.0145929	7.95487e-07	8298	Isoleucine to phosphate ratio	TRUE	reported	8OaKyv	0.00292811	24.3629	2	1	TRUE
rs62093367	A	G	A	G	0.0957318	-0.0202027	0.133088	NA	FALSE	FALSE	FALSE	EBI-a-GCST002318	18	48900980	0.37	0.0253885	57284	EBI-a-GCST002318	TRUE	reported	18	51374610	0.0215811	9.16852e-06	8298	Isoleucine to phosphate ratio	TRUE	reported	8OaKyv	0.00236572	19.6725	2	1	TRUE
rs6942431	G	A	G	A	-0.0681398	0.0100503	0.355248	NA	FALSE	FALSE	FALSE	EBI-a-GCST002318	7	41015761	0.48	0.0156998	57284	EBI-a-GCST002318	TRUE	reported	7	40976163	0.0153805	9.41207e-06	8298	Isoleucine to phosphate ratio	TRUE	reported	8OaKyv	0.00235972	19.6226	2	1	TRUE
rs7324755	C	T	C	T	-0.117451	-0.0295588	0.0799537	NA	FALSE	FALSE	FALSE	EBI-a-GCST002318	13	90190575	0.34	0.0306214	57284	EBI-a-GCST002318	TRUE	reported	13	89538321	0.0265195	9.47417e-06	8298	Isoleucine to phosphate ratio	TRUE	reported	8OaKyv	0.00235822	19.61	2	1	TRUE
rs73271806	T	C	T	C	-0.113331	-0.0618754	0.110005	NA	FALSE	FALSE	FALSE	EBI-a-GCST002318	20	50080983	0.08	0.0366458	57284	EBI-a-GCST002318	TRUE	reported	20	51464446	0.0232157	1.0519e-06	8298	Isoleucine to phosphate ratio	TRUE	reported	8OaKyv	0.00286362	23.8248	2	1	TRUE
rs75847252	C	T	C	T	0.253807	-0.00995033	0.0183104	NA	FALSE	FALSE	FALSE	EBI-a-GCST002318	9	71483481	0.96	0.125343	57284	EBI-a-GCST002318	TRUE	reported	9	68868565	0.0541714	2.79605e-06	8298	Isoleucine to phosphate ratio	TRUE	reported	8OaKyv	0.00263843	21.9464	2	1	TRUE
rs77275380	T	C	T	C	0.308325	0.14842	0.0111272	NA	FALSE	FALSE	FALSE	EBI-a-GCST002318	2	178869476	0.13	0.0995764	57284	EBI-a-GCST002318	TRUE	reported	2	178004749	0.0690998	8.11854e-06	8298	Isoleucine to phosphate ratio	TRUE	reported	8OaKyv	0.00239359	19.9049	2	1	TRUE
rs7779835	C	T	C	T	0.22396	0.0512933	0.0219102	NA	FALSE	FALSE	FALSE	EBI-a-GCST002318	7	79686983	0.16	0.033286	57284	EBI-a-GCST002318	TRUE	reported	7	80057667	0.0495221	6.11328e-06	8298	Isoleucine to phosphate ratio	TRUE	reported	8OaKyv	0.00245867	20.4474	2	1	TRUE
rs78145602	T	C	T	C	-0.17984	0.0582689	0.0429735	NA	FALSE	FALSE	FALSE	EBI-a-GCST002318	8	64850419	0.23	0.0459955	57284	EBI-a-GCST002318	TRUE	reported	8	63937862	0.0355643	4.26464e-07	8298	Isoleucine to phosphate ratio	TRUE	reported	8OaKyv	0.00307209	25.5646	2	1	TRUE
rs80084508	T	G	T	G	-0.121794	0.0582689	0.0806452	NA	FALSE	FALSE	FALSE	EBI-a-GCST002318	8	3473315	0.52	0.0881851	57284	EBI-a-GCST002318	TRUE	reported	8	3615793	0.0270413	6.66881e-06	8298	Isoleucine to phosphate ratio	TRUE	reported	8OaKyv	0.00243872	20.2811	2	1	TRUE
rs80197269	G	A	G	A	-0.152764	0.0943107	0.0495468	NA	FALSE	FALSE	FALSE	EBI-a-GCST002318	6	91505161	0.08	0.059393	57284	EBI-a-GCST002318	TRUE	reported	6	90795443	0.0331395	4.03211e-06	8298	Isoleucine to phosphate ratio	TRUE	reported	8OaKyv	0.00255427	21.2444	2	1	TRUE
rs9643611	G	T	G	T	0.076665	0	0.24828	NA	FALSE	FALSE	FALSE	EBI-a-GCST002318	8	70809973	0.9	0.0155404	57284	EBI-a-GCST002318	TRUE	reported	8	69897738	0.0168616	5.4487e-06	8298	Isoleucine to phosphate ratio	TRUE	reported	8OaKyv	0.00248509	20.6677	2	1	TRUE
rs1000768	T	G	T	G	0.0683876	-0.0100503	0.549981	NA	FALSE	FALSE	FALSE	EBI-a-GCST002318	11	34513932	0.51	0.0152311	57284	EBI-a-GCST002318	TRUE	reported	11	34492385	0.0154364	9.41139e-06	8232	Glycosyl-N-behenoyl-sphingadienine (d18:2/22:0) levels	TRUE	reported	JynOXh	0.00237861	19.6226	2	1	TRUE
rs10511533	C	T	C	T	-0.179238	0.0833816	0.0405208	NA	FALSE	FALSE	FALSE	EBI-a-GCST002318	9	10115598	0.0879995	0.0464142	57284	EBI-a-GCST002318	TRUE	reported	9	10115598	0.0382674	2.81562e-06	8232	Glycosyl-N-behenoyl-sphingadienine (d18:2/22:0) levels	TRUE	reported	JynOXh	0.00265791	21.9329	2	1	TRUE
rs10823631	G	A	G	A	0.0986998	0.0100503	0.324848	NA	FALSE	FALSE	FALSE	EBI-a-GCST002318	10	72625741	0.54	0.0156998	57284	EBI-a-GCST002318	TRUE	reported	10	70865984	0.0161334	9.49297e-10	8232	Glycosyl-N-behenoyl-sphingadienine (d18:2/22:0) levels	TRUE	reported	JynOXh	0.0045259	37.4175	2	1	TRUE
rs11647674	T	G	T	G	-0.0747483	0	0.646406	NA	FALSE	FALSE	FALSE	EBI-a-GCST002318	16	78392409	1	0.0200106	57284	EBI-a-GCST002318	TRUE	reported	16	78358512	0.0159924	2.95388e-06	8232	Glycosyl-N-behenoyl-sphingadienine (d18:2/22:0) levels	TRUE	reported	JynOXh	0.00264679	21.8409	2	1	TRUE
rs11722463	A	G	A	G	0.163258	-0.0304592	0.368972	NA	FALSE	FALSE	FALSE	EBI-a-GCST002318	4	48038716	0.0280001	0.0155404	57284	EBI-a-GCST002318	TRUE	reported	4	48036699	0.015626	1.49884e-25	8232	Glycosyl-N-behenoyl-sphingadienine (d18:2/22:0) levels	TRUE	reported	JynOXh	0.0130866	109.131	2	1	TRUE
rs117394165	T	C	T	C	0.180797	0.0487902	0.0375076	NA	FALSE	FALSE	FALSE	EBI-a-GCST002318	11	66456402	0.49	0.0638587	57284	EBI-a-GCST002318	TRUE	reported	11	66688931	0.0398928	5.84101e-06	8232	Glycosyl-N-behenoyl-sphingadienine (d18:2/22:0) levels	TRUE	reported	JynOXh	0.00248889	20.5347	2	1	TRUE
rs12113068	T	G	T	G	0.17193	-0.0100503	0.0515936	NA	FALSE	FALSE	FALSE	EBI-a-GCST002318	7	155227866	0.89	0.0852317	57284	EBI-a-GCST002318	TRUE	reported	7	155435171	0.0344189	5.87723e-07	8232	Glycosyl-N-behenoyl-sphingadienine (d18:2/22:0) levels	TRUE	reported	JynOXh	0.00302197	24.9462	2	1	TRUE
rs12193198	A	G	A	G	0.0714555	-0.0100503	0.450625	NA	FALSE	FALSE	FALSE	EBI-a-GCST002318	6	169734411	0.7	0.0202087	57284	EBI-a-GCST002318	TRUE	reported	6	169334316	0.0153453	3.21615e-06	8232	Glycosyl-N-behenoyl-sphingadienine (d18:2/22:0) levels	TRUE	reported	JynOXh	0.00262708	21.6778	2	1	TRUE
rs1784494	A	G	A	G	-0.0740639	0.00995033	0.551793	NA	FALSE	FALSE	FALSE	EBI-a-GCST002318	8	107686072	0.67	0.0149339	57284	EBI-a-GCST002318	TRUE	reported	8	106673844	0.0151951	1.09251e-06	8232	Glycosyl-N-behenoyl-sphingadienine (d18:2/22:0) levels	TRUE	reported	JynOXh	0.00287772	23.752	2	1	TRUE
rs261290	C	T	C	T	-0.0760656	0.0100503	0.657281	NA	FALSE	FALSE	FALSE	EBI-a-GCST002318	15	58678720	0.61	0.0104127	57284	EBI-a-GCST002318	TRUE	reported	15	58386521	0.0163746	3.3951e-06	8232	Glycosyl-N-behenoyl-sphingadienine (d18:2/22:0) levels	TRUE	reported	JynOXh	0.00261453	21.5739	2	1	TRUE
rs28416749	C	T	C	T	0.0893799	-0.0198026	0.218276	NA	FALSE	FALSE	FALSE	EBI-a-GCST002318	4	47544632	0.42	0.0256438	57284	EBI-a-GCST002318	TRUE	reported	4	47542615	0.0188068	2.00883e-06	8232	Glycosyl-N-behenoyl-sphingadienine (d18:2/22:0) levels	TRUE	reported	JynOXh	0.00273624	22.5811	2	1	TRUE
rs2989751	G	A	G	A	-0.0798624	0	0.752606	NA	FALSE	FALSE	FALSE	EBI-a-GCST002318	9	96366647	0.88	0.0155404	57284	EBI-a-GCST002318	TRUE	reported	9	93604365	0.0176439	6.00149e-06	8232	Glycosyl-N-behenoyl-sphingadienine (d18:2/22:0) levels	TRUE	reported	JynOXh	0.00248262	20.4828	2	1	TRUE
rs35818294	A	C	A	C	0.300353	0.0295588	0.176799	NA	FALSE	FALSE	FALSE	EBI-a-GCST002318	4	47545141	0.14	0.0194387	57284	EBI-a-GCST002318	TRUE	reported	4	47543124	0.0198764	1.36982e-51	8232	Glycosyl-N-behenoyl-sphingadienine (d18:2/22:0) levels	TRUE	reported	JynOXh	0.0269899	228.288	2	1	TRUE
rs3750434	A	G	A	G	0.103985	0	0.425369	NA	FALSE	FALSE	FALSE	EBI-a-GCST002318	9	35739876	0.85	0.015081	57284	EBI-a-GCST002318	TRUE	reported	9	35739879	0.0153983	1.44811e-11	8232	Glycosyl-N-behenoyl-sphingadienine (d18:2/22:0) levels	TRUE	reported	JynOXh	0.00550923	45.5922	2	1	TRUE
rs728185	G	A	G	A	-0.131589	-0.00995033	0.075142	NA	FALSE	FALSE	FALSE	EBI-a-GCST002318	8	94275977	0.75	0.0312467	57284	EBI-a-GCST002318	TRUE	reported	8	93263749	0.0293093	7.13336e-06	8232	Glycosyl-N-behenoyl-sphingadienine (d18:2/22:0) levels	TRUE	reported	JynOXh	0.00244265	20.1522	2	1	TRUE
rs7320739	G	T	G	T	-0.0952298	0.0304592	0.167324	NA	FALSE	FALSE	FALSE	EBI-a-GCST002318	13	106938049	0.11	0.0214855	57284	EBI-a-GCST002318	TRUE	reported	13	106285700	0.0204931	3.36922e-06	8232	Glycosyl-N-behenoyl-sphingadienine (d18:2/22:0) levels	TRUE	reported	JynOXh	0.0026163	21.5886	2	1	TRUE
rs7585677	G	A	G	A	0.0696798	-0.0198026	0.429949	NA	FALSE	FALSE	FALSE	EBI-a-GCST002318	2	184525038	0.19	0.0152311	57284	EBI-a-GCST002318	TRUE	reported	2	183660310	0.0155359	7.28895e-06	8232	Glycosyl-N-behenoyl-sphingadienine (d18:2/22:0) levels	TRUE	reported	JynOXh	0.00243767	20.1111	2	1	TRUE
rs76357200	C	A	C	A	0.238586	0.0512933	0.0220714	NA	FALSE	FALSE	FALSE	EBI-a-GCST002318	14	49145373	0.48	0.0813407	57284	EBI-a-GCST002318	TRUE	reported	14	48676170	0.0516857	3.9103e-06	8232	Glycosyl-N-behenoyl-sphingadienine (d18:2/22:0) levels	TRUE	reported	JynOXh	0.00258179	21.3031	2	1	TRUE
rs76560367	G	T	G	T	-0.260923	0.139262	0.0195255	NA	FALSE	FALSE	FALSE	EBI-a-GCST002318	6	27638744	0.0420001	0.0689667	57284	EBI-a-GCST002318	TRUE	reported	6	27670965	0.0549368	2.03917e-06	8232	Glycosyl-N-behenoyl-sphingadienine (d18:2/22:0) levels	TRUE	reported	JynOXh	0.00273278	22.5524	2	1	TRUE
rs7657342	T	C	T	C	0.0751754	-0.0100503	0.691694	NA	FALSE	FALSE	FALSE	EBI-a-GCST002318	4	25630015	0.450001	0.0152311	57284	EBI-a-GCST002318	TRUE	reported	4	25628393	0.0168021	7.67054e-06	8232	Glycosyl-N-behenoyl-sphingadienine (d18:2/22:0) levels	TRUE	reported	JynOXh	0.00242585	20.0133	2	1	TRUE
rs7953249	A	G	A	G	0.0706765	0	0.589212	NA	FALSE	FALSE	FALSE	EBI-a-GCST002318	12	121403724	0.760001	0.015081	57284	EBI-a-GCST002318	TRUE	reported	12	120965921	0.0154152	4.54321e-06	8232	Glycosyl-N-behenoyl-sphingadienine (d18:2/22:0) levels	TRUE	reported	JynOXh	0.00254706	21.0158	2	1	TRUE
rs8037196	G	A	G	A	0.0746057	0.0100503	0.706535	NA	FALSE	FALSE	FALSE	EBI-a-GCST002318	15	53236602	0.49	0.0156998	57284	EBI-a-GCST002318	TRUE	reported	15	52944405	0.0166957	7.87435e-06	8232	Glycosyl-N-behenoyl-sphingadienine (d18:2/22:0) levels	TRUE	reported	JynOXh	0.00241979	19.9632	2	1	TRUE
rs10007799	A	G	A	G	-0.159871	0.0392207	0.0499193	NA	FALSE	FALSE	FALSE	EBI-a-GCST002318	4	32446724	0.0569994	0.0239576	57284	EBI-a-GCST002318	TRUE	reported	4	32445102	0.0352124	5.62026e-06	8090	Carboxyethyl-gaba levels	TRUE	reported	EJk5n2	0.00254153	20.6082	2	1	TRUE
rs10226985	C	T	C	T	0.176859	-0.0295588	0.0479719	NA	FALSE	FALSE	FALSE	EBI-a-GCST002318	7	30541841	0.52	0.0466501	57284	EBI-a-GCST002318	TRUE	reported	7	30502225	0.0363456	1.13868e-06	8090	Carboxyethyl-gaba levels	TRUE	reported	EJk5n2	0.00291832	23.6725	2	1	TRUE
rs1165152	G	A	G	A	-0.137002	-0.0198026	0.554937	NA	FALSE	FALSE	FALSE	EBI-a-GCST002318	6	25818766	0.27	0.0152311	57284	EBI-a-GCST002318	TRUE	reported	6	25818538	0.0153637	4.7803e-19	8090	Carboxyethyl-gaba levels	TRUE	reported	EJk5n2	0.00973343	79.4977	2	1	TRUE
rs1213850	C	T	C	T	-0.0823861	0	0.643789	NA	FALSE	FALSE	FALSE	EBI-a-GCST002318	1	119202269	0.79	0.0155404	57284	EBI-a-GCST002318	TRUE	reported	1	118659646	0.0159727	2.49689e-07	8090	Carboxyethyl-gaba levels	TRUE	reported	EJk5n2	0.00327776	26.5977	2	1	TRUE
rs13435198	G	A	G	A	-0.070316	0	0.377507	NA	FALSE	FALSE	FALSE	EBI-a-GCST002318	4	155802606	0.98	0.0155404	57284	EBI-a-GCST002318	TRUE	reported	4	154881454	0.0158751	9.45275e-06	8090	Carboxyethyl-gaba levels	TRUE	reported	EJk5n2	0.00241922	19.6141	2	1	TRUE
rs13438347	A	C	A	C	0.115088	0	0.104751	NA	FALSE	FALSE	FALSE	EBI-a-GCST002318	7	52784785	0.99	0.0200106	57284	EBI-a-GCST002318	TRUE	reported	7	52717091	0.0251837	4.87846e-06	8090	Carboxyethyl-gaba levels	TRUE	reported	EJk5n2	0.00257486	20.8792	2	1	TRUE
rs151029871	A	G	A	G	-0.258486	0.0392207	0.0205531	NA	FALSE	FALSE	FALSE	EBI-a-GCST002318	14	64189110	0.780001	0.158896	57284	EBI-a-GCST002318	TRUE	reported	14	63722392	0.0541148	1.78269e-06	8090	Carboxyethyl-gaba levels	TRUE	reported	EJk5n2	0.00281236	22.8105	2	1	TRUE
rs17721101	C	A	C	A	-0.131607	0.0304592	0.0777241	NA	FALSE	FALSE	FALSE	EBI-a-GCST002318	12	48228821	0.46	0.0439156	57284	EBI-a-GCST002318	TRUE	reported	12	47835038	0.02852	3.93909e-06	8090	Carboxyethyl-gaba levels	TRUE	reported	EJk5n2	0.00262524	21.2888	2	1	TRUE
rs2404849	G	T	G	T	-0.104966	-0.0198026	0.87087	NA	FALSE	FALSE	FALSE	EBI-a-GCST002318	1	224272792	0.47	0.0256438	57284	EBI-a-GCST002318	TRUE	reported	1	224085090	0.0237378	9.78378e-06	8090	Carboxyethyl-gaba levels	TRUE	reported	EJk5n2	0.00241112	19.5483	2	1	TRUE
rs3744683	C	T	C	T	0.317992	-0.0582689	0.0115213	NA	FALSE	FALSE	FALSE	EBI-a-GCST002318	17	3513462	0.21	0.0452694	57284	EBI-a-GCST002318	TRUE	reported	17	3610168	0.0717051	9.21955e-06	8090	Carboxyethyl-gaba levels	TRUE	reported	EJk5n2	0.0024251	19.6619	2	1	TRUE
rs4725969	T	C	T	C	-0.115901	-0.0100503	0.332723	NA	FALSE	FALSE	FALSE	EBI-a-GCST002318	7	150558515	0.58	0.0202087	57284	EBI-a-GCST002318	TRUE	reported	7	150861427	0.01647	1.96251e-12	8090	Carboxyethyl-gaba levels	TRUE	reported	EJk5n2	0.00608399	49.5085	2	1	TRUE
rs62492368	A	G	A	G	0.146094	0	0.304096	NA	FALSE	FALSE	FALSE	EBI-a-GCST002318	7	150537635	0.85	0.015081	57284	EBI-a-GCST002318	TRUE	reported	7	150840547	0.0167314	2.50774e-18	8090	Carboxyethyl-gaba levels	TRUE	reported	EJk5n2	0.00933637	76.2242	2	1	TRUE
rs6416742	T	C	T	C	-0.0719088	0	0.348745	NA	FALSE	FALSE	FALSE	EBI-a-GCST002318	16	72149061	0.93	0.015081	57284	EBI-a-GCST002318	TRUE	reported	16	72115162	0.0159954	6.93739e-06	8090	Carboxyethyl-gaba levels	TRUE	reported	EJk5n2	0.00249196	20.2054	2	1	TRUE
rs73177136	G	A	G	A	-0.261052	0.105361	0.0184429	NA	FALSE	FALSE	FALSE	EBI-a-GCST002318	13	40215134	0.3	0.106811	57284	EBI-a-GCST002318	TRUE	reported	13	39640997	0.056199	3.39849e-06	8090	Carboxyethyl-gaba levels	TRUE	reported	EJk5n2	0.00266006	21.572	2	1	TRUE
rs7707197	T	G	T	G	-0.142409	0.00995033	0.0641425	NA	FALSE	FALSE	FALSE	EBI-a-GCST002318	5	150494130	0.8	0.0198162	57284	EBI-a-GCST002318	TRUE	reported	5	151114569	0.0311735	4.91796e-06	8090	Carboxyethyl-gaba levels	TRUE	reported	EJk5n2	0.00257298	20.8639	2	1	TRUE
rs78022645	T	C	T	C	-0.175046	-0.0202027	0.0478374	NA	FALSE	FALSE	FALSE	EBI-a-GCST002318	11	94774806	0.87	0.0990592	57284	EBI-a-GCST002318	TRUE	reported	11	95041642	0.0361585	1.29135e-06	8090	Carboxyethyl-gaba levels	TRUE	reported	EJk5n2	0.00288854	23.4302	2	1	TRUE
rs1000821	T	C	T	C	0.0955501	0	0.460226	NA	FALSE	FALSE	FALSE	EBI-a-GCST002318	17	74434003	0.92	0.0200106	57284	EBI-a-GCST002318	TRUE	reported	17	76437921	0.0152708	3.92298e-10	8246	Sphingosine 1-phosphate levels	TRUE	reported	DyFWrJ	0.0047254	39.1411	2	1	TRUE
rs10502344	G	A	G	A	0.190151	0.0100503	0.0362631	NA	FALSE	FALSE	FALSE	EBI-a-GCST002318	18	6107709	0.89	0.0486276	57284	EBI-a-GCST002318	TRUE	reported	18	6107710	0.0413987	4.36607e-06	8246	Sphingosine 1-phosphate levels	TRUE	reported	DyFWrJ	0.00255194	21.092	2	1	TRUE
rs10744901	C	T	C	T	-0.0733906	-0.00995033	0.317054	NA	FALSE	FALSE	FALSE	EBI-a-GCST002318	12	118145683	0.64	0.0206171	57284	EBI-a-GCST002318	TRUE	reported	12	117707878	0.0164198	7.83555e-06	8246	Sphingosine 1-phosphate levels	TRUE	reported	DyFWrJ	0.00241686	19.9728	2	1	TRUE
rs10960927	C	T	C	T	0.157515	0.0725707	0.0494112	NA	FALSE	FALSE	FALSE	EBI-a-GCST002318	9	13072341	0.17	0.0519299	57284	EBI-a-GCST002318	TRUE	reported	9	13072342	0.0353441	8.32674e-06	8246	Sphingosine 1-phosphate levels	TRUE	reported	DyFWrJ	0.00240282	19.8566	2	1	TRUE
rs115939317	T	C	T	C	0.27762	-0.328504	0.0153631	NA	FALSE	FALSE	FALSE	EBI-a-GCST002318	4	114651674	0.0299999	0.152064	57284	EBI-a-GCST002318	TRUE	reported	4	113730518	0.0620996	7.80146e-06	8246	Sphingosine 1-phosphate levels	TRUE	reported	DyFWrJ	0.00241785	19.9811	2	1	TRUE
rs11657811	A	G	A	G	0.0860213	0.00995033	0.221752	NA	FALSE	FALSE	FALSE	EBI-a-GCST002318	17	66535123	0.719999	0.0149339	57284	EBI-a-GCST002318	TRUE	reported	17	68538982	0.0185607	3.5765e-06	8246	Sphingosine 1-phosphate levels	TRUE	reported	DyFWrJ	0.00259807	21.4742	2	1	TRUE
rs140079282	A	C	A	C	-0.261606	0.0198026	0.0184262	NA	FALSE	FALSE	FALSE	EBI-a-GCST002318	3	99166438	0.79	0.0743428	57284	EBI-a-GCST002318	TRUE	reported	3	99447594	0.056463	3.60008e-06	8246	Sphingosine 1-phosphate levels	TRUE	reported	DyFWrJ	0.00259654	21.4616	2	1	TRUE
rs141116536	C	T	C	T	0.229382	0.0202027	0.0266543	NA	FALSE	FALSE	FALSE	EBI-a-GCST002318	6	1333169	0.88	0.150259	57284	EBI-a-GCST002318	TRUE	reported	6	1332934	0.0484838	2.233e-06	8246	Sphingosine 1-phosphate levels	TRUE	reported	DyFWrJ	0.0027071	22.3779	2	1	TRUE
rs1456759	T	C	T	C	-0.0816351	0.0198026	0.737365	NA	FALSE	FALSE	FALSE	EBI-a-GCST002318	4	31549421	0.21	0.0196257	57284	EBI-a-GCST002318	TRUE	reported	4	31547799	0.0173502	2.53695e-06	8246	Sphingosine 1-phosphate levels	TRUE	reported	DyFWrJ	0.00267755	22.133	2	1	TRUE
rs1488103	A	G	A	G	-0.0723142	-0.0202027	0.393833	NA	FALSE	FALSE	FALSE	EBI-a-GCST002318	3	168925594	0.19	0.0153842	57284	EBI-a-GCST002318	TRUE	reported	3	169207806	0.015939	5.70756e-06	8246	Sphingosine 1-phosphate levels	TRUE	reported	DyFWrJ	0.00249	20.5788	2	1	TRUE
rs41397245	A	G	A	G	-0.0776802	-0.0202027	0.378124	NA	FALSE	FALSE	FALSE	EBI-a-GCST002318	5	77170663	0.35	0.0204109	57284	EBI-a-GCST002318	TRUE	reported	5	77874839	0.0161082	1.41834e-06	8246	Sphingosine 1-phosphate levels	TRUE	reported	DyFWrJ	0.00281229	23.2499	2	1	TRUE
rs6493965	G	A	G	A	-0.0718094	0.0202027	0.644609	NA	FALSE	FALSE	FALSE	EBI-a-GCST002318	15	58186161	0.22	0.0212616	57284	EBI-a-GCST002318	TRUE	reported	15	57893963	0.0160027	7.21237e-06	8246	Sphingosine 1-phosphate levels	TRUE	reported	DyFWrJ	0.00243598	20.1312	2	1	TRUE
rs71588370	G	A	G	A	0.184415	0.105361	0.0394801	NA	FALSE	FALSE	FALSE	EBI-a-GCST002318	5	104157179	0.0560003	0.0537554	57284	EBI-a-GCST002318	TRUE	reported	5	104821478	0.0392364	2.60043e-06	8246	Sphingosine 1-phosphate levels	TRUE	reported	DyFWrJ	0.00267183	22.0856	2	1	TRUE
rs7200047	A	G	A	G	0.0725737	0	0.49245	NA	FALSE	FALSE	FALSE	EBI-a-GCST002318	16	83151469	0.97	0.015081	57284	EBI-a-GCST002318	TRUE	reported	16	83117864	0.0157374	3.99671e-06	8246	Sphingosine 1-phosphate levels	TRUE	reported	DyFWrJ	0.00257235	21.2612	2	1	TRUE
rs9360664	A	G	A	G	-0.0936889	0.0198026	0.1805	NA	FALSE	FALSE	FALSE	EBI-a-GCST002318	6	74041424	0.47	0.0196257	57284	EBI-a-GCST002318	TRUE	reported	6	73331701	0.0200697	3.03896e-06	8246	Sphingosine 1-phosphate levels	TRUE	reported	DyFWrJ	0.00263575	21.7866	2	1	TRUE
rs10960835	T	C	T	C	0.0629963	0	0.490523	NA	FALSE	FALSE	FALSE	EBI-a-GCST002318	9	12917730	0.85	0.015081	57284	EBI-a-GCST002318	TRUE	reported	9	12917731	0.014204	9.20237e-06	8176	Glycerol to sulfate ratio	TRUE	reported	Dfi00U	0.00240007	19.6654	2	1	TRUE
rs11176065	T	C	T	C	-0.0695849	0.00995033	0.349505	NA	FALSE	FALSE	FALSE	EBI-a-GCST002318	12	66551898	0.53	0.0149339	57284	EBI-a-GCST002318	TRUE	reported	12	66158118	0.0146488	2.03196e-06	8176	Glycerol to sulfate ratio	TRUE	reported	Dfi00U	0.00275225	22.559	2	1	TRUE
rs112873937	A	G	A	G	0.147286	0.0198026	0.0488346	NA	FALSE	FALSE	FALSE	EBI-a-GCST002318	8	18315905	0.67	0.0385243	57284	EBI-a-GCST002318	TRUE	reported	8	18458395	0.0326234	6.33915e-06	8176	Glycerol to sulfate ratio	TRUE	reported	Dfi00U	0.00248681	20.3778	2	1	TRUE
rs114376408	A	G	A	G	-0.111935	0.0198026	0.0838323	NA	FALSE	FALSE	FALSE	EBI-a-GCST002318	5	16576873	0.48	0.0338648	57284	EBI-a-GCST002318	TRUE	reported	5	16576764	0.0253364	9.96383e-06	8176	Glycerol to sulfate ratio	TRUE	reported	Dfi00U	0.00238158	19.5135	2	1	TRUE
rs116874771	A	C	A	C	0.187001	0.10436	0.029737	NA	FALSE	FALSE	FALSE	EBI-a-GCST002318	10	84935738	0.0649995	0.0523746	57284	EBI-a-GCST002318	TRUE	reported	10	83175982	0.0412626	5.84345e-06	8176	Glycerol to sulfate ratio	TRUE	reported	Dfi00U	0.00250579	20.5338	2	1	TRUE
rs118041812	G	A	G	A	0.308188	-0.076961	0.0123616	NA	FALSE	FALSE	FALSE	EBI-a-GCST002318	8	76274823	0.4	0.0873835	57284	EBI-a-GCST002318	TRUE	reported	8	75362588	0.0635033	1.2155e-06	8176	Glycerol to sulfate ratio	TRUE	reported	Dfi00U	0.00287243	23.5468	2	1	TRUE
rs142156573	C	A	C	A	-0.30223	0.0725707	0.0144828	NA	FALSE	FALSE	FALSE	EBI-a-GCST002318	1	8909247	0.450001	0.0897401	57284	EBI-a-GCST002318	TRUE	reported	1	8849188	0.059141	3.21587e-07	8176	Glycerol to sulfate ratio	TRUE	reported	Dfi00U	0.00318399	26.1091	2	1	TRUE
rs1632215	A	G	A	G	-0.0700727	-0.0100503	0.658984	NA	FALSE	FALSE	FALSE	EBI-a-GCST002318	13	27311246	0.53	0.0152311	57284	EBI-a-GCST002318	TRUE	reported	13	26737109	0.0151983	4.01577e-06	8176	Glycerol to sulfate ratio	TRUE	reported	Dfi00U	0.00259322	21.2521	2	1	TRUE
rs2306885	C	A	C	A	-0.115653	-0.0198026	0.0983948	NA	FALSE	FALSE	FALSE	EBI-a-GCST002318	12	95656522	0.39	0.0204109	57284	EBI-a-GCST002318	TRUE	reported	12	95262746	0.0235655	9.21306e-07	8176	Glycerol to sulfate ratio	TRUE	reported	Dfi00U	0.00293726	24.0799	2	1	TRUE
rs282729	C	A	C	A	0.079684	-0.00995033	0.234286	NA	FALSE	FALSE	FALSE	EBI-a-GCST002318	4	59481067	0.79	0.0206171	57284	EBI-a-GCST002318	TRUE	reported	4	58614902	0.0163632	1.11768e-06	8176	Glycerol to sulfate ratio	TRUE	reported	Dfi00U	0.00289206	23.7083	2	1	TRUE
rs2846070	A	C	A	C	-0.100858	-0.0512933	0.111869	NA	FALSE	FALSE	FALSE	EBI-a-GCST002318	11	76004761	0.0690001	0.02617	57284	EBI-a-GCST002318	TRUE	reported	11	76293717	0.0222178	5.63808e-06	8176	Glycerol to sulfate ratio	TRUE	reported	Dfi00U	0.00251411	20.6021	2	1	TRUE
rs34437475	A	G	A	G	0.0785341	0.00995033	0.2	NA	FALSE	FALSE	FALSE	EBI-a-GCST002318	21	28274812	0.82	0.0246523	57284	EBI-a-GCST002318	TRUE	reported	21	26902493	0.017477	7.00363e-06	8176	Glycerol to sulfate ratio	TRUE	reported	Dfi00U	0.0024636	20.1872	2	1	TRUE
rs35408848	A	G	A	G	0.0881991	0	0.166687	NA	FALSE	FALSE	FALSE	EBI-a-GCST002318	8	9809042	0.96	0.0200106	57284	EBI-a-GCST002318	TRUE	reported	8	9951532	0.0189635	3.30328e-06	8176	Glycerol to sulfate ratio	TRUE	reported	Dfi00U	0.00263878	21.6264	2	1	TRUE
rs56040563	T	C	T	C	0.111538	0.076961	0.107815	NA	FALSE	FALSE	FALSE	EBI-a-GCST002318	3	132702923	0.0309999	0.0364587	57284	EBI-a-GCST002318	TRUE	reported	3	132984079	0.0229083	1.12226e-06	8176	Glycerol to sulfate ratio	TRUE	reported	Dfi00U	0.00289109	23.7003	2	1	TRUE
rs61942622	G	T	G	T	-0.116684	0.0100503	0.0823025	NA	FALSE	FALSE	FALSE	EBI-a-GCST002318	12	111010642	0.81	0.0374139	57284	EBI-a-GCST002318	TRUE	reported	12	110572837	0.0254146	4.40667e-06	8176	Glycerol to sulfate ratio	TRUE	reported	Dfi00U	0.00257156	21.0741	2	1	TRUE
rs62018653	C	T	C	T	0.138383	-0.00995033	0.0578766	NA	FALSE	FALSE	FALSE	EBI-a-GCST002318	15	95512519	0.74	0.0312467	57284	EBI-a-GCST002318	TRUE	reported	15	94969290	0.0300104	4.00374e-06	8176	Glycerol to sulfate ratio	TRUE	reported	Dfi00U	0.0025939	21.2577	2	1	TRUE
rs6790404	T	G	T	G	0.20007	-0.0100503	0.0250308	NA	FALSE	FALSE	FALSE	EBI-a-GCST002318	3	172366647	0.94	0.0895739	57284	EBI-a-GCST002318	TRUE	reported	3	172648857	0.0445981	7.25467e-06	8176	Glycerol to sulfate ratio	TRUE	reported	Dfi00U	0.0024554	20.1199	2	1	TRUE
rs7662677	G	A	G	A	0.0627138	0.0100503	0.555888	NA	FALSE	FALSE	FALSE	EBI-a-GCST002318	4	182565693	0.450001	0.0156998	57284	EBI-a-GCST002318	TRUE	reported	4	181644540	0.014098	8.65056e-06	8176	Glycerol to sulfate ratio	TRUE	reported	Dfi00U	0.00241446	19.7836	2	1	TRUE
rs10164764	A	G	A	G	-0.173882	0.0392207	0.0418385	NA	FALSE	FALSE	FALSE	EBI-a-GCST002318	2	165462231	0.450001	0.0423454	57284	EBI-a-GCST002318	TRUE	reported	2	164605721	0.035576	1.02069e-06	8255	Myristoleate (14:1n5) levels	TRUE	reported	CjYwbe	0.00288551	23.8831	2	1	TRUE
rs1422881	T	C	T	C	-0.0701876	0.0295588	0.453304	NA	FALSE	FALSE	FALSE	EBI-a-GCST002318	5	158865801	0.0409996	0.014648	57284	EBI-a-GCST002318	TRUE	reported	5	159438793	0.0144292	1.14877e-06	8255	Myristoleate (14:1n5) levels	TRUE	reported	CjYwbe	0.00285809	23.6554	2	1	TRUE
rs143706129	A	G	A	G	-0.131294	0.00995033	0.0690223	NA	FALSE	FALSE	FALSE	EBI-a-GCST002318	2	230887128	0.9	0.0435509	57284	EBI-a-GCST002318	TRUE	reported	2	230022412	0.0278821	2.49039e-06	8255	Myristoleate (14:1n5) levels	TRUE	reported	CjYwbe	0.0026789	22.1684	2	1	TRUE
rs148890850	T	C	T	C	0.18222	-0.105361	0.0306554	NA	FALSE	FALSE	FALSE	EBI-a-GCST002318	9	33336478	0.41	0.12948	57284	EBI-a-GCST002318	TRUE	reported	9	33336480	0.0411292	9.40481e-06	8255	Myristoleate (14:1n5) levels	TRUE	reported	CjYwbe	0.00237215	19.6239	2	1	TRUE
rs2371397	A	G	A	G	-0.0705478	0	0.383953	NA	FALSE	FALSE	FALSE	EBI-a-GCST002318	7	144101502	0.91	0.015081	57284	EBI-a-GCST002318	TRUE	reported	7	144404409	0.0147874	1.83486e-06	8255	Myristoleate (14:1n5) levels	TRUE	reported	CjYwbe	0.00274961	22.7551	2	1	TRUE
rs291035	A	C	A	C	0.0867177	0.00995033	0.166768	NA	FALSE	FALSE	FALSE	EBI-a-GCST002318	15	95638952	0.59	0.0198162	57284	EBI-a-GCST002318	TRUE	reported	15	95095723	0.0190835	5.51661e-06	8255	Myristoleate (14:1n5) levels	TRUE	reported	CjYwbe	0.00249515	20.644	2	1	TRUE
rs603424	A	G	A	G	-0.0971173	0.0295588	0.175518	NA	FALSE	FALSE	FALSE	EBI-a-GCST002318	10	102075479	0.3	0.0241848	57284	EBI-a-GCST002318	TRUE	reported	10	100315722	0.0185985	1.7722e-07	8255	Myristoleate (14:1n5) levels	TRUE	reported	CjYwbe	0.00329221	27.2604	2	1	TRUE
rs621211	C	T	C	T	0.0659414	0.040822	0.408704	NA	FALSE	FALSE	FALSE	EBI-a-GCST002318	9	29535541	0.021	0.0161983	57284	EBI-a-GCST002318	TRUE	reported	9	29535543	0.0144655	5.15159e-06	8255	Myristoleate (14:1n5) levels	TRUE	reported	CjYwbe	0.00251096	20.7752	2	1	TRUE
rs78325276	C	T	C	T	-0.106697	0.0202027	0.100364	NA	FALSE	FALSE	FALSE	EBI-a-GCST002318	6	81229876	0.54	0.0322341	57284	EBI-a-GCST002318	TRUE	reported	6	80520159	0.0236829	6.62972e-06	8255	Myristoleate (14:1n5) levels	TRUE	reported	CjYwbe	0.00245274	20.2922	2	1	TRUE
rs80053496	A	G	A	G	-0.219127	-0.040822	0.0209142	NA	FALSE	FALSE	FALSE	EBI-a-GCST002318	21	40573870	0.6	0.0786483	57284	EBI-a-GCST002318	TRUE	reported	21	39201944	0.0491706	8.33207e-06	8255	Myristoleate (14:1n5) levels	TRUE	reported	CjYwbe	0.00240005	19.8553	2	1	TRUE
rs10008401	C	T	C	T	0.0800086	0.0100503	0.609542	NA	FALSE	FALSE	FALSE	EBI-a-GCST002318	4	117779937	0.34	0.0156998	57284	EBI-a-GCST002318	TRUE	reported	4	116858781	0.0170477	2.68944e-06	6902	Suberate (C8-DC) levels	TRUE	reported	mULYmV	0.00318114	22.0199	2	1	TRUE
rs11158833	G	A	G	A	-0.0922378	0.0100503	0.759084	NA	FALSE	FALSE	FALSE	EBI-a-GCST002318	14	70578411	0.54	0.0156998	57284	EBI-a-GCST002318	TRUE	reported	14	70111694	0.0196709	2.74475e-06	6902	Suberate (C8-DC) levels	TRUE	reported	mULYmV	0.00317551	21.9808	2	1	TRUE
rs11705994	T	C	T	C	0.218723	0.076961	0.0297142	NA	FALSE	FALSE	FALSE	EBI-a-GCST002318	3	73368081	0.15	0.0537554	57284	EBI-a-GCST002318	TRUE	reported	3	73318930	0.0493421	9.30183e-06	6902	Suberate (C8-DC) levels	TRUE	reported	mULYmV	0.00283886	19.6439	2	1	TRUE
rs117499033	G	A	G	A	0.30721	-0.122218	0.0142545	NA	FALSE	FALSE	FALSE	EBI-a-GCST002318	18	42578174	0.18	0.088526	57284	EBI-a-GCST002318	TRUE	reported	18	44998209	0.0691456	8.87382e-06	6902	Suberate (C8-DC) levels	TRUE	reported	mULYmV	0.00285185	19.734	2	1	TRUE
rs141183746	C	A	C	A	0.161019	-0.00995033	0.0572184	NA	FALSE	FALSE	FALSE	EBI-a-GCST002318	6	164343235	0.95	0.106327	57284	EBI-a-GCST002318	TRUE	reported	6	163922203	0.0364413	9.93437e-06	6902	Suberate (C8-DC) levels	TRUE	reported	mULYmV	0.00282075	19.5182	2	1	TRUE
rs1551619	T	C	T	C	-0.0957862	0.0582689	0.230903	NA	FALSE	FALSE	FALSE	EBI-a-GCST002318	17	73885805	0.00109999	0.0142392	57284	EBI-a-GCST002318	TRUE	reported	17	75889724	0.0197795	1.28083e-06	6902	Suberate (C8-DC) levels	TRUE	reported	mULYmV	0.00338631	23.445	2	1	TRUE
rs17738405	C	T	C	T	-0.193637	0.0100503	0.0453877	NA	FALSE	FALSE	FALSE	EBI-a-GCST002318	7	3275523	0.8	0.0659244	57284	EBI-a-GCST002318	TRUE	reported	7	3235891	0.0395206	9.60098e-07	6902	Suberate (C8-DC) levels	TRUE	reported	mULYmV	0.00346615	23.9996	2	1	TRUE
rs4689177	T	C	T	C	0.108829	-0.0202027	0.144896	NA	FALSE	FALSE	FALSE	EBI-a-GCST002318	4	4594474	0.35	0.0204109	57284	EBI-a-GCST002318	TRUE	reported	4	4592747	0.023723	4.48615e-06	6902	Suberate (C8-DC) levels	TRUE	reported	mULYmV	0.00303986	21.039	2	1	TRUE
[truncated: 31,336 more rows]

## Sheet: Table 7
Supplementary Table 7: The results of mediation analysis
[truncated: 6 more rows]

## Sheet: Table 8
Supplementary Table 8: Differential genes between groups of DC with high and low autophagy scores.
[truncated: 7,687 more rows]

[truncated: 4 more sheets: Table 9, Table 10, Table 11, Table 12]
